# Supplementary material for: Molecular and spatial profiling of the paraventricular nucleus of the thalamus
Source: eLife. 2023 Mar 3;12:e81818. doi: 10.7554/eLife.81818 (PMC10014079; doi:10.7554/eLife.81818)
Supplement: Supplementary file 1. [file elife-81818-supp1.xlsx]

## Sheet: Supplementary File 1a
Supplementary File 1a. Differential gene expression analysis for all clusters
genes	p_val	avg_log2FC	pct.1	pct.2	p_val_adj	cluster	gene	pct_ratio
Ptch1	0	42.1787	0.89	0.309	0	Astrocytes (1)	Ptch1	2.88026
A2m	0	39.6278	0.228	0.02	0	Astrocytes (1)	A2m	11.4
Wdr17	0	39.3007	0.91	0.474	0	Astrocytes (1)	Wdr17	1.91983
Phka1	0	19.8624	0.647	0.369	0	Astrocytes (1)	Phka1	1.75339
Camk2g	0	18.7035	0.833	0.354	0	Astrocytes (1)	Camk2g	2.35311
Kank1	0	17.9797	0.73	0.096	0	Astrocytes (1)	Kank1	7.60417
Sfxn5	0	17.749	0.898	0.498	0	Astrocytes (1)	Sfxn5	1.80321
Itpkb	0	14.5215	0.501	0.225	0	Astrocytes (1)	Itpkb	2.22667
Aqp4	0	13.7823	0.651	0.109	0	Astrocytes (1)	Aqp4	5.97248
Nhsl1	0	11.6733	0.782	0.192	0	Astrocytes (1)	Nhsl1	4.07292
Grk3	0	11.2249	0.845	0.427	0	Astrocytes (1)	Grk3	1.97892
Pitpnc1	0	10.9009	0.984	0.646	0	Astrocytes (1)	Pitpnc1	1.52322
Slc1a2	0	10.4735	0.981	0.708	0	Astrocytes (1)	Slc1a2	1.38559
B230323A14Rik	0	9.24522	0.671	0.057	0	Astrocytes (1)	B230323A14Rik	11.7719
Aldh1a1	0	8.91711	0.201	0.031	0	Astrocytes (1)	Aldh1a1	6.48387
Tprkb	0	8.5247	0.625	0.261	0	Astrocytes (1)	Tprkb	2.39464
Gm3764	0	7.86801	0.958	0.175	0	Astrocytes (1)	Gm3764	5.47429
Lrig1	0	7.5601	0.714	0.113	0	Astrocytes (1)	Lrig1	6.31858
Plce1	0	7.27744	0.624	0.091	0	Astrocytes (1)	Plce1	6.85714
Gm6145	0	7.19095	0.65	0.028	0	Astrocytes (1)	Gm6145	23.2143
Arhgef4	0	6.80913	0.562	0.246	0	Astrocytes (1)	Arhgef4	2.28455
Sash1	0	5.9277	0.804	0.464	0	Astrocytes (1)	Sash1	1.73276
Pcx	0	5.69094	0.493	0.214	0	Astrocytes (1)	Pcx	2.30374
Nwd1	0	5.61882	0.723	0.1	0	Astrocytes (1)	Nwd1	7.23
Acsbg1	0	5.58695	0.55	0.058	0	Astrocytes (1)	Acsbg1	9.48276
Hdac8	0	5.25785	0.88	0.642	0	Astrocytes (1)	Hdac8	1.37072
Atp13a4	0	5.09622	0.694	0.049	0	Astrocytes (1)	Atp13a4	14.1633
Appl2	0	5.05195	0.687	0.282	0	Astrocytes (1)	Appl2	2.43617
Nkx2-2os	0	5.02596	0.226	0.047	0	Astrocytes (1)	Nkx2-2os	4.80851
C030005K06Rik	0	4.99512	0.393	0.011	0	Astrocytes (1)	C030005K06Rik	35.7273
Adamts9	0	4.77309	0.217	0.043	0	Astrocytes (1)	Adamts9	5.04651
Frmpd1	0	4.74444	0.423	0.058	0	Astrocytes (1)	Frmpd1	7.2931
Rfx4	0	4.68829	0.691	0.112	0	Astrocytes (1)	Rfx4	6.16964
Pik3r1	0	4.11872	0.629	0.332	0	Astrocytes (1)	Pik3r1	1.89458
Prrx1	0	3.83134	0.356	0.035	0	Astrocytes (1)	Prrx1	10.1714
Lgi1	0	3.64858	0.747	0.436	0	Astrocytes (1)	Lgi1	1.7133
Fam20a	0	3.58816	0.714	0.326	0	Astrocytes (1)	Fam20a	2.19018
Gm9750	0	3.45532	0.215	0.021	0	Astrocytes (1)	Gm9750	10.2381
Irak2	0	3.41677	0.358	0.106	0	Astrocytes (1)	Irak2	3.37736
Arhgef26	0	3.38321	0.601	0.18	0	Astrocytes (1)	Arhgef26	3.33889
Acss1	0	3.18494	0.596	0.084	0	Astrocytes (1)	Acss1	7.09524
Fads2	0	3.17097	0.657	0.219	0	Astrocytes (1)	Fads2	3
Gm11713	0	2.93093	0.45	0.141	0	Astrocytes (1)	Gm11713	3.19149
Gm29521	0	2.93069	0.132	0.004	0	Astrocytes (1)	Gm29521	33
Gli2	0	2.72658	0.492	0.034	0	Astrocytes (1)	Gli2	14.4706
Tnfaip8	0	2.64634	0.451	0.056	0	Astrocytes (1)	Tnfaip8	8.05357
Mtss2	0	2.60244	0.502	0.124	0	Astrocytes (1)	Mtss2	4.04839
Folh1	0	2.56363	0.474	0.087	0	Astrocytes (1)	Folh1	5.44828
Gm10561	0	2.55513	0.17	0.022	0	Astrocytes (1)	Gm10561	7.72727
Gm48747	0	2.54485	0.641	0.339	0	Astrocytes (1)	Gm48747	1.89086
Cdh22	0	2.53645	0.428	0.133	0	Astrocytes (1)	Cdh22	3.21805
Gpld1	0	2.32514	0.622	0.271	0	Astrocytes (1)	Gpld1	2.2952
Gli3	0	2.30326	0.462	0.042	0	Astrocytes (1)	Gli3	11
Tcf7l1	0	2.19095	0.379	0.044	0	Astrocytes (1)	Tcf7l1	8.61364
Slc7a10	0	2.14594	0.592	0.059	0	Astrocytes (1)	Slc7a10	10.0339
Rftn2	0	2.01554	0.363	0.066	0	Astrocytes (1)	Rftn2	5.5
Dbx2	0	1.99218	0.362	0.042	0	Astrocytes (1)	Dbx2	8.61905
Slc27a1	0	1.91485	0.559	0.217	0	Astrocytes (1)	Slc27a1	2.57604
Cecr2	0	1.82362	0.416	0.067	0	Astrocytes (1)	Cecr2	6.20896
Hif3a	0	1.81904	0.254	0.027	0	Astrocytes (1)	Hif3a	9.40741
Lgr6	0	1.81468	0.409	0.028	0	Astrocytes (1)	Lgr6	14.6071
Foxo1	0	1.79889	0.445	0.126	0	Astrocytes (1)	Foxo1	3.53175
Vcl	0	1.78194	0.566	0.276	0	Astrocytes (1)	Vcl	2.05072
Adcy5	0	1.76423	0.052	0.406	0	Astrocytes (1)	Adcy5	0.128079
Cyp2j9	0	1.75496	0.493	0.051	0	Astrocytes (1)	Cyp2j9	9.66667
Rgma	0	1.69933	0.527	0.21	0	Astrocytes (1)	Rgma	2.50952
Ccdc190	0	1.6957	0.347	0.046	0	Astrocytes (1)	Ccdc190	7.54348
Sugct	0	1.62592	0.31	0.089	0	Astrocytes (1)	Sugct	3.48315
Mmp14	0	1.58206	0.287	0.039	0	Astrocytes (1)	Mmp14	7.35897
Mfge8	0	1.50894	0.332	0.064	0	Astrocytes (1)	Mfge8	5.1875
Megf10	0	1.46704	0.411	0.111	0	Astrocytes (1)	Megf10	3.7027
Fgd6	0	1.45973	0.425	0.084	0	Astrocytes (1)	Fgd6	5.05952
Tead1	0	1.40732	0.474	0.131	0	Astrocytes (1)	Tead1	3.61832
Adgrg1	0	1.38523	0.413	0.14	0	Astrocytes (1)	Adgrg1	2.95
Phkg1	0	1.37334	0.532	0.082	0	Astrocytes (1)	Phkg1	6.4878
Gramd3	0	1.33312	0.464	0.095	0	Astrocytes (1)	Gramd3	4.88421
Slc25a18	0	1.27692	0.535	0.103	0	Astrocytes (1)	Slc25a18	5.19417
Lgi4	0	1.24168	0.313	0.029	0	Astrocytes (1)	Lgi4	10.7931
Mmd2	0	1.23512	0.637	0.182	0	Astrocytes (1)	Mmd2	3.5
Cyp4f15	0	1.23318	0.349	0.028	0	Astrocytes (1)	Cyp4f15	12.4643
Gm9925	0	1.22487	0.42	0.064	0	Astrocytes (1)	Gm9925	6.5625
Acot11	0	1.22162	0.335	0.055	0	Astrocytes (1)	Acot11	6.09091
Adhfe1	0	1.20687	0.358	0.064	0	Astrocytes (1)	Adhfe1	5.59375
Aldh1l1	0	1.1925	0.321	0.042	0	Astrocytes (1)	Aldh1l1	7.64286
Smo	0	1.17932	0.35	0.05	0	Astrocytes (1)	Smo	7
Boc	0	1.16565	0.228	0.031	0	Astrocytes (1)	Boc	7.35484
Gm11266	0	1.14767	0.337	0.035	0	Astrocytes (1)	Gm11266	9.62857
Rab34	0	1.13122	0.36	0.062	0	Astrocytes (1)	Rab34	5.80645
Ednrb	0	1.12726	0.496	0.079	0	Astrocytes (1)	Ednrb	6.27848
Sox1ot	0	1.06562	0.335	0.029	0	Astrocytes (1)	Sox1ot	11.5517
Gm26703	0	0.991602	0.301	0.022	0	Astrocytes (1)	Gm26703	13.6818
Sdc4	0	0.978855	0.303	0.059	0	Astrocytes (1)	Sdc4	5.13559
Slc38a3	0	0.976126	0.279	0.042	0	Astrocytes (1)	Slc38a3	6.64286
A330076C08Rik	0	0.95516	0.22	0.019	0	Astrocytes (1)	A330076C08Rik	11.5789
Gm40578	0	0.935274	0.537	0.09	0	Astrocytes (1)	Gm40578	5.96667
Fgfr3	0	0.917746	0.66	0.078	0	Astrocytes (1)	Fgfr3	8.46154
Slc15a2	0	0.912962	0.338	0.074	0	Astrocytes (1)	Slc15a2	4.56757
Frem1	0	0.901404	0.218	0.025	0	Astrocytes (1)	Frem1	8.72
Eva1a	0	0.889904	0.278	0.032	0	Astrocytes (1)	Eva1a	8.6875
Tmem44	0	0.875167	0.217	0.035	0	Astrocytes (1)	Tmem44	6.2
Lfng	0	0.856266	0.31	0.044	0	Astrocytes (1)	Lfng	7.04545
Igsf1	0	0.843578	0.213	0.027	0	Astrocytes (1)	Igsf1	7.88889
Sh3pxd2b	0	0.821228	0.359	0.107	0	Astrocytes (1)	Sh3pxd2b	3.35514
Gli1	0	0.811379	0.24	0.018	0	Astrocytes (1)	Gli1	13.3333
9330188P03Rik	0	0.756889	0.2	0.016	0	Astrocytes (1)	9330188P03Rik	12.5
Gm45025	0	0.755099	0.205	0.022	0	Astrocytes (1)	Gm45025	9.31818
Paqr6	0	0.754442	0.257	0.034	0	Astrocytes (1)	Paqr6	7.55882
Slc30a10	0	0.752143	0.364	0.077	0	Astrocytes (1)	Slc30a10	4.72727
Gm20646	0	0.743043	0.197	0.024	0	Astrocytes (1)	Gm20646	8.20833
Frem2	0	0.716551	0.2	0.022	0	Astrocytes (1)	Frem2	9.09091
Btbd17	0	0.659546	0.418	0.078	0	Astrocytes (1)	Btbd17	5.35897
Arap2	0	0.657588	0.645	0.256	0	Astrocytes (1)	Arap2	2.51953
Tlcd1	0	0.626497	0.308	0.052	0	Astrocytes (1)	Tlcd1	5.92308
Egfros	0	0.618409	0.137	0.008	0	Astrocytes (1)	Egfros	17.125
Gm13266	0	0.613771	0.131	0.008	0	Astrocytes (1)	Gm13266	16.375
Slc13a5	0	0.603683	0.22	0.032	0	Astrocytes (1)	Slc13a5	6.875
Entpd2	0	0.575615	0.145	0.008	0	Astrocytes (1)	Entpd2	18.125
Cyp2d22	0	0.56836	0.205	0.029	0	Astrocytes (1)	Cyp2d22	7.06897
Pipox	0	0.529051	0.173	0.015	0	Astrocytes (1)	Pipox	11.5333
Pantr2	0	0.525339	0.178	0.02	0	Astrocytes (1)	Pantr2	8.9
2310022B05Rik	0	0.520436	0.33	0.096	0	Astrocytes (1)	2310022B05Rik	3.4375
Notch1	0	0.507768	0.285	0.058	0	Astrocytes (1)	Notch1	4.91379
Psd2	5.52518e-306	5.80241	0.434	0.179	1.85105e-301	Astrocytes (1)	Psd2	2.42458
Gm26512	5.11937e-305	1.34938	0.14	0.014	1.71509e-300	Astrocytes (1)	Gm26512	10
Aox1	1.08008e-303	0.75964	0.15	0.018	3.61847e-299	Astrocytes (1)	Aox1	8.33333
Gm11714	9.09494e-303	1.07361	0.235	0.054	3.04699e-298	Astrocytes (1)	Gm11714	4.35185
Myo10	1.97708e-292	0.581989	0.523	0.247	6.62361e-288	Astrocytes (1)	Myo10	2.11741
Pnpla7	4.75707e-290	1.4795	0.419	0.172	1.59371e-285	Astrocytes (1)	Pnpla7	2.43605
Gsap	3.01455e-286	1.91581	0.25	0.064	1.00993e-281	Astrocytes (1)	Gsap	3.90625
4932438H23Rik	3.27809e-281	1.29284	0.204	0.043	1.09823e-276	Astrocytes (1)	4932438H23Rik	4.74419
Insyn2a	2.92502e-274	0.969025	0.223	0.053	9.7994e-270	Astrocytes (1)	Insyn2a	4.20755
Pdzph1	1.25627e-271	0.988789	0.13	0.014	4.20875e-267	Astrocytes (1)	Pdzph1	9.28571
Rdh5	7.10506e-270	1.03194	0.209	0.047	2.38034e-265	Astrocytes (1)	Rdh5	4.44681
Gm26862	1.90819e-269	0.710232	0.14	0.018	6.39283e-265	Astrocytes (1)	Gm26862	7.77778
Il18	5.64798e-269	1.81173	0.428	0.184	1.89219e-264	Astrocytes (1)	Il18	2.32609
Ttc23	1.89563e-266	0.818488	0.273	0.081	6.35073e-262	Astrocytes (1)	Ttc23	3.37037
Eps15	1.18022e-265	2.35216	0.7	0.458	3.95398e-261	Astrocytes (1)	Eps15	1.52838
Gm42836	1.31078e-264	0.650106	0.104	0.007	4.39137e-260	Astrocytes (1)	Gm42836	14.8571
Gpam	1.03037e-262	2.21783	0.381	0.157	3.45193e-258	Astrocytes (1)	Gpam	2.42675
Ppara	3.53778e-261	0.684036	0.166	0.029	1.18523e-256	Astrocytes (1)	Ppara	5.72414
Ttyh1	8.99265e-247	0.94118	0.827	0.567	3.01272e-242	Astrocytes (1)	Ttyh1	1.45855
Myo6	3.24524e-240	3.83973	0.744	0.514	1.08722e-235	Astrocytes (1)	Myo6	1.44747
Soat1	2.91491e-231	0.707214	0.397	0.174	9.76552e-227	Astrocytes (1)	Soat1	2.28161
Fam228b	2.44093e-229	1.09624	0.437	0.209	8.1776e-225	Astrocytes (1)	Fam228b	2.09091
Meis1	2.586e-223	0.954891	0.241	0.074	8.66363e-219	Astrocytes (1)	Meis1	3.25676
A330093E20Rik	5.84346e-221	2.04535	0.204	0.055	1.95768e-216	Astrocytes (1)	A330093E20Rik	3.70909
Smox	1.50311e-210	0.665585	0.294	0.11	5.03574e-206	Astrocytes (1)	Smox	2.67273
Tmc7	1.28202e-209	1.93589	0.429	0.212	4.29503e-205	Astrocytes (1)	Tmc7	2.02358
C330002G04Rik	1.1706e-204	1.25293	0.176	0.044	3.92175e-200	Astrocytes (1)	C330002G04Rik	4
Adra1a	2.18461e-204	0.986552	0.202	0.057	7.31887e-200	Astrocytes (1)	Adra1a	3.54386
Il17rd	2.96593e-203	0.576063	0.184	0.048	9.93646e-199	Astrocytes (1)	Il17rd	3.83333
Abcd2	1.66319e-201	0.781902	0.279	0.103	5.57202e-197	Astrocytes (1)	Abcd2	2.70874
Adk	3.42936e-199	4.55471	0.779	0.568	1.1489e-194	Astrocytes (1)	Adk	1.37148
Znrf3	2.04049e-198	9.73334	0.72	0.495	6.83606e-194	Astrocytes (1)	Znrf3	1.45455
Tpcn1	2.88732e-197	1.13749	0.389	0.185	9.67309e-193	Astrocytes (1)	Tpcn1	2.1027
Celrr	6.10602e-187	0.609059	0.187	0.053	2.04564e-182	Astrocytes (1)	Celrr	3.5283
Abhd3	7.33204e-185	0.585557	0.336	0.147	2.45638e-180	Astrocytes (1)	Abhd3	2.28571
Emb	1.43601e-183	0.912434	0.037	0.223	4.81093e-179	Astrocytes (1)	Emb	0.165919
Utp14b	3.8435e-180	1.17921	0.281	0.112	1.28765e-175	Astrocytes (1)	Utp14b	2.50893
Cdyl	1.35865e-178	3.95802	0.123	0.33	4.55176e-174	Astrocytes (1)	Cdyl	0.372727
Phf21b	2.18552e-178	0.50864	0.183	0.053	7.32194e-174	Astrocytes (1)	Phf21b	3.45283
Vegfa	1.12096e-169	1.03587	0.323	0.147	3.75544e-165	Astrocytes (1)	Vegfa	2.19728
Sall2	1.48494e-169	0.574996	0.235	0.086	4.97485e-165	Astrocytes (1)	Sall2	2.73256
Son	1.74593e-165	3.23249	0.95	0.855	5.84921e-161	Astrocytes (1)	Son	1.11111
Hes1	5.42286e-164	1.68376	0.156	0.042	1.81677e-159	Astrocytes (1)	Hes1	3.71429
Slc6a9	7.11665e-150	0.634375	0.362	0.185	2.38422e-145	Astrocytes (1)	Slc6a9	1.95676
Slc1a4	6.44714e-149	0.68361	0.341	0.168	2.15992e-144	Astrocytes (1)	Slc1a4	2.02976
Trmt9b	7.59934e-138	0.553862	0.224	0.089	2.54593e-133	Astrocytes (1)	Trmt9b	2.51685
Gm14858	1.12422e-137	7.34636	0.376	0.202	3.76635e-133	Astrocytes (1)	Gm14858	1.86139
Rhoq	1.71957e-116	1.12907	0.384	0.222	5.76092e-112	Astrocytes (1)	Rhoq	1.72973
Stard13	1.80007e-113	4.22096	0.318	0.167	6.03059e-109	Astrocytes (1)	Stard13	1.90419
Gm15601	7.29232e-111	0.565425	0.186	0.075	2.44307e-106	Astrocytes (1)	Gm15601	2.48
Lifr	1.25857e-110	0.923605	0.287	0.146	4.21645e-106	Astrocytes (1)	Lifr	1.96575
Gm31356	7.35915e-106	1.65202	0.176	0.07	2.46546e-101	Astrocytes (1)	Gm31356	2.51429
Prex1	1.39616e-101	0.63177	0.335	0.188	4.67743e-97	Astrocytes (1)	Prex1	1.78191
Nim1k	1.05906e-94	1.57251	0.424	0.27	3.54806e-90	Astrocytes (1)	Nim1k	1.57037
Mettl24	1.4068e-93	0.523585	0.214	0.1	4.71307e-89	Astrocytes (1)	Mettl24	2.14
Per3	4.80901e-87	1.12585	0.339	0.199	1.61111e-82	Astrocytes (1)	Per3	1.70352
Hacd2	2.35985e-85	0.605687	0.518	0.366	7.90598e-81	Astrocytes (1)	Hacd2	1.4153
Ppp1r14c	7.53457e-72	1.21212	0.398	0.262	2.52423e-67	Astrocytes (1)	Ppp1r14c	1.51908
Tmem164	3.00841e-70	1.97551	0.689	0.527	1.00788e-65	Astrocytes (1)	Tmem164	1.3074
Elmo2	1.58101e-68	0.82243	0.338	0.216	5.2967e-64	Astrocytes (1)	Elmo2	1.56481
Tsc22d3	2.95198e-68	0.995433	0.214	0.113	9.88972e-64	Astrocytes (1)	Tsc22d3	1.89381
Peli2	4.32289e-66	0.913301	0.322	0.201	1.44825e-61	Astrocytes (1)	Peli2	1.60199
Rapgef3	4.99816e-64	0.634833	0.349	0.23	1.67448e-59	Astrocytes (1)	Rapgef3	1.51739
Atl2	4.98516e-63	0.867712	0.389	0.263	1.67013e-58	Astrocytes (1)	Atl2	1.47909
Phyhd1	1.05734e-60	0.534718	0.225	0.127	3.54231e-56	Astrocytes (1)	Phyhd1	1.77165
9630028H03Rik	1.03709e-56	7.92228	0.383	0.262	3.47445e-52	Astrocytes (1)	9630028H03Rik	1.46183
Pcolce2	5.87846e-55	8.68743	0.208	0.333	1.9694e-50	Astrocytes (1)	Pcolce2	0.624625
Zswim5	6.365e-54	1.90764	0.321	0.212	2.1324e-49	Astrocytes (1)	Zswim5	1.51415
Gm12239	1.13362e-53	4.14647	0.425	0.297	3.79787e-49	Astrocytes (1)	Gm12239	1.43098
Smad3	5.64735e-43	3.23884	0.262	0.171	1.89198e-38	Astrocytes (1)	Smad3	1.53216
Dtx1	7.97061e-41	1.18158	0.32	0.225	2.67032e-36	Astrocytes (1)	Dtx1	1.42222
Efhd1	6.80491e-36	1.09955	0.112	0.058	2.27978e-31	Astrocytes (1)	Efhd1	1.93103
Gm16541	2.42695e-29	0.84133	0.08	0.143	8.13075e-25	Astrocytes (1)	Gm16541	0.559441
Gm11146	3.86848e-18	0.666851	0.17	0.121	1.29602e-13	Astrocytes (1)	Gm11146	1.40496
Mras	1.33362e-16	1.12755	0.351	0.286	4.4679e-12	Astrocytes (1)	Mras	1.22727
Sertad2	2.25435e-16	3.94855	0.364	0.297	7.55252e-12	Astrocytes (1)	Sertad2	1.22559
Thbs3	2.58209e-14	1.31049	0.13	0.092	8.65053e-10	Astrocytes (1)	Thbs3	1.41304
Plpp3	0	45.1142	0.982	0.525	0	Astrocytes (2)	Plpp3	1.87048
Sparcl1	0	37.9577	0.996	0.549	0	Astrocytes (2)	Sparcl1	1.81421
Slc1a3	0	30.2981	0.959	0.385	0	Astrocytes (2)	Slc1a3	2.49091
Slc6a11	0	20.6788	0.986	0.387	0	Astrocytes (2)	Slc6a11	2.5478
Gja1	0	16.762	0.959	0.283	0	Astrocytes (2)	Gja1	3.38869
Ntsr2	0	10.7645	0.896	0.244	0	Astrocytes (2)	Ntsr2	3.67213
Gjb6	0	10.15	0.762	0.138	0	Astrocytes (2)	Gjb6	5.52174
Id3	0	9.69399	0.575	0.097	0	Astrocytes (2)	Id3	5.92784
Tril	0	8.14017	0.668	0.135	0	Astrocytes (2)	Tril	4.94815
Cldn10	0	7.77364	0.797	0.171	0	Astrocytes (2)	Cldn10	4.66082
Pla2g7	0	7.67313	0.944	0.279	0	Astrocytes (2)	Pla2g7	3.38351
Agt	0	6.7915	0.973	0.287	0	Astrocytes (2)	Agt	3.39024
Id2	0	6.47611	0.575	0.096	0	Astrocytes (2)	Id2	5.98958
Itih3	0	6.19117	0.889	0.251	0	Astrocytes (2)	Itih3	3.54183
Hes5	0	6.17955	0.553	0.088	0	Astrocytes (2)	Hes5	6.28409
F3	0	5.32096	0.741	0.184	0	Astrocytes (2)	F3	4.02717
Slc7a101	0	3.739	0.705	0.159	0	Astrocytes (2)	Slc7a10	4.43396
Btbd171	0	3.71317	0.672	0.136	0	Astrocytes (2)	Btbd17	4.94118
Sdc41	0	2.99145	0.588	0.097	0	Astrocytes (2)	Sdc4	6.06186
Gpr37l1	0	2.84368	0.916	0.248	0	Astrocytes (2)	Gpr37l1	3.69355
Tlcd11	0	2.7617	0.541	0.093	0	Astrocytes (2)	Tlcd1	5.8172
Tst	0	2.75158	0.485	0.054	0	Astrocytes (2)	Tst	8.98148
Mfge81	0	2.41887	0.612	0.107	0	Astrocytes (2)	Mfge8	5.71963
Fam181b	0	2.12842	0.45	0.039	0	Astrocytes (2)	Fam181b	11.5385
Fxyd1	0	2.10982	0.494	0.069	0	Astrocytes (2)	Fxyd1	7.15942
Cxcl14	0	1.97175	0.463	0.071	0	Astrocytes (2)	Cxcl14	6.52113
Lfng1	0	1.91422	0.519	0.089	0	Astrocytes (2)	Lfng	5.83146
Mtss1l	0	1.5985	0.544	0.081	0	Astrocytes (2)	Mtss1l	6.71605
AI464131	0	0.87545	0.228	0.01	0	Astrocytes (2)	AI464131	22.8
S1pr1	0	0.857495	0.63	0.121	0	Astrocytes (2)	S1pr1	5.20661
Sox1	3.35332e-307	2.1511	0.377	0.047	1.12343e-302	Astrocytes (2)	Sox1	8.02128
Ednrb1	7.33239e-306	5.12713	0.668	0.154	2.4565e-301	Astrocytes (2)	Ednrb	4.33766
Fabp7	1.03562e-296	4.04919	0.484	0.083	3.46952e-292	Astrocytes (2)	Fabp7	5.83133
Slc4a4	4.91831e-284	35.0242	0.979	0.425	1.64773e-279	Astrocytes (2)	Slc4a4	2.30353
Fgfr31	1.16586e-282	4.90302	0.72	0.19	3.90585e-278	Astrocytes (2)	Fgfr3	3.78947
2310022B05Rik1	5.46604e-278	3.58724	0.591	0.133	1.83123e-273	Astrocytes (2)	2310022B05Rik	4.44361
Kcnj10	1.14602e-261	17.2593	0.821	0.297	3.83939e-257	Astrocytes (2)	Kcnj10	2.76431
Htra1	1.21899e-258	18.1541	0.73	0.208	4.08386e-254	Astrocytes (2)	Htra1	3.50962
Slc39a12	4.35166e-253	0.92646	0.797	0.25	1.45789e-248	Astrocytes (2)	Slc39a12	3.188
Mdk	9.74682e-252	1.40616	0.384	0.059	3.26538e-247	Astrocytes (2)	Mdk	6.50847
Hepacam	1.6337e-247	4.63072	0.821	0.29	5.47321e-243	Astrocytes (2)	Hepacam	2.83103
Lcat	4.08559e-246	1.49962	0.346	0.049	1.36875e-241	Astrocytes (2)	Lcat	7.06122
Mmd21	3.4024e-243	4.60131	0.778	0.266	1.13987e-238	Astrocytes (2)	Mmd2	2.92481
Lppos	5.78194e-243	0.687351	0.187	0.013	1.93707e-238	Astrocytes (2)	Lppos	14.3846
Slc6a1	2.08571e-236	6.13684	0.831	0.316	6.98756e-232	Astrocytes (2)	Slc6a1	2.62975
Atp1b2	1.07943e-231	8.37882	0.834	0.374	3.6163e-227	Astrocytes (2)	Atp1b2	2.22995
Ccdc1901	1.22207e-229	1.01498	0.488	0.1	4.09416e-225	Astrocytes (2)	Ccdc190	4.88
Cd63	9.78375e-221	1.26249	0.698	0.217	3.27775e-216	Astrocytes (2)	Cd63	3.21659
Slc25a181	1.64166e-216	3.62515	0.64	0.184	5.49989e-212	Astrocytes (2)	Slc25a18	3.47826
Ndrg2	1.81123e-213	4.78249	0.862	0.43	6.06799e-209	Astrocytes (2)	Ndrg2	2.00465
Etnppl	8.63419e-206	16.1184	0.629	0.181	2.89263e-201	Astrocytes (2)	Etnppl	3.47514
Eva1a1	1.70557e-196	1.23261	0.394	0.076	5.714e-192	Astrocytes (2)	Eva1a	5.18421
Fam107a	3.60898e-196	0.717463	0.435	0.093	1.20908e-191	Astrocytes (2)	Fam107a	4.67742
Thrsp	1.46526e-192	1.36369	0.278	0.04	4.90891e-188	Astrocytes (2)	Thrsp	6.95
Lxn	1.47216e-191	0.780501	0.253	0.033	4.93205e-187	Astrocytes (2)	Lxn	7.66667
Dbx21	1.98165e-190	2.08275	0.451	0.102	6.63894e-186	Astrocytes (2)	Dbx2	4.42157
Asrgl1	1.82608e-188	3.12071	0.724	0.28	6.11773e-184	Astrocytes (2)	Asrgl1	2.58571
Gadd45g	2.38974e-183	2.05615	0.329	0.058	8.00611e-179	Astrocytes (2)	Gadd45g	5.67241
Pou3f2	6.17879e-178	1.08854	0.346	0.064	2.07002e-173	Astrocytes (2)	Pou3f2	5.40625
Paqr61	2.58219e-172	0.980582	0.368	0.074	8.65085e-168	Astrocytes (2)	Paqr6	4.97297
Cyp2j91	3.0723e-171	2.42466	0.509	0.137	1.02928e-166	Astrocytes (2)	Cyp2j9	3.71533
Cyp4f151	1.39721e-167	1.23147	0.402	0.089	4.68093e-163	Astrocytes (2)	Cyp4f15	4.51685
6430573F11Rik	8.40733e-165	0.838565	0.229	0.031	2.81662e-160	Astrocytes (2)	6430573F11Rik	7.3871
Slc30a101	8.38033e-162	2.7133	0.48	0.129	2.80758e-157	Astrocytes (2)	Slc30a10	3.72093
Hes11	1.89131e-159	0.707802	0.314	0.059	6.33628e-155	Astrocytes (2)	Hes1	5.32203
Prex2	8.72523e-156	13.1835	0.768	0.313	2.92313e-151	Astrocytes (2)	Prex2	2.45367
Acss11	4.32821e-154	2.4214	0.579	0.185	1.45004e-149	Astrocytes (2)	Acss1	3.12973
Atp13a41	1.01646e-153	0.80731	0.586	0.179	3.40535e-149	Astrocytes (2)	Atp13a4	3.27374
Foxb1	5.95285e-152	2.58231	0.215	0.03	1.99432e-147	Astrocytes (2)	Foxb1	7.16667
Adgrg11	7.1402e-148	1.56149	0.567	0.188	2.39211e-143	Astrocytes (2)	Adgrg1	3.01596
Gm99251	2.70981e-146	2.48193	0.467	0.132	9.07839e-142	Astrocytes (2)	Gm9925	3.53788
Gstm5	8.57341e-139	0.879819	0.617	0.246	2.87226e-134	Astrocytes (2)	Gstm5	2.50813
Mmp141	2.93324e-138	0.977073	0.363	0.085	9.82692e-134	Astrocytes (2)	Mmp14	4.27059
Igsf11	1.43204e-137	1.42842	0.3	0.061	4.79761e-133	Astrocytes (2)	Igsf1	4.91803
Slc15a21	3.50857e-137	2.00783	0.439	0.122	1.17544e-132	Astrocytes (2)	Slc15a2	3.59836
Ppp1r3c	5.14317e-135	0.842606	0.25	0.044	1.72306e-130	Astrocytes (2)	Ppp1r3c	5.68182
Rab341	7.084e-133	1.97219	0.423	0.118	2.37328e-128	Astrocytes (2)	Rab34	3.58475
Lgi41	1.7585e-129	1.07567	0.35	0.084	5.89133e-125	Astrocytes (2)	Lgi4	4.16667
Cyp2d221	2.1437e-128	0.837439	0.291	0.061	7.18182e-124	Astrocytes (2)	Cyp2d22	4.77049
Kcnj16	1.44613e-125	0.969806	0.3	0.065	4.84482e-121	Astrocytes (2)	Kcnj16	4.61538
Phkg11	1.54282e-123	1.3886	0.511	0.171	5.16874e-119	Astrocytes (2)	Phkg1	2.9883
Slc38a31	1.77958e-123	0.637584	0.35	0.086	5.96195e-119	Astrocytes (2)	Slc38a3	4.06977
Nkx6-2	1.38129e-122	4.03548	0.307	0.071	4.62758e-118	Astrocytes (2)	Nkx6-2	4.32394
Slitrk2	2.41013e-121	0.880061	0.325	0.078	8.07441e-117	Astrocytes (2)	Slitrk2	4.16667
Emp2	9.6598e-121	0.544595	0.239	0.044	3.23622e-116	Astrocytes (2)	Emp2	5.43182
Pxmp2	5.7902e-120	0.5894	0.201	0.032	1.93983e-115	Astrocytes (2)	Pxmp2	6.28125
Aldh1l11	4.09371e-118	0.862942	0.363	0.095	1.37148e-113	Astrocytes (2)	Aldh1l1	3.82105
Fzd10	1.89633e-116	0.84692	0.225	0.041	6.35308e-112	Astrocytes (2)	Fzd10	5.4878
Ddit4	1.26534e-114	0.765553	0.235	0.045	4.23914e-110	Astrocytes (2)	Ddit4	5.22222
Slc14a1	3.58205e-113	0.767822	0.233	0.044	1.20006e-108	Astrocytes (2)	Slc14a1	5.29545
Sat1	2.7925e-112	5.59736	0.581	0.239	9.35543e-108	Astrocytes (2)	Sat1	2.43096
Pik3ip1	4.6876e-111	1.90131	0.453	0.151	1.57044e-106	Astrocytes (2)	Pik3ip1	3
Cdc42ep4	9.87434e-111	1.19826	0.263	0.057	3.3081e-106	Astrocytes (2)	Cdc42ep4	4.61404
Tsc22d31	3.31154e-107	2.6474	0.399	0.126	1.10943e-102	Astrocytes (2)	Tsc22d3	3.16667
Acsl3	6.12216e-107	7.9913	0.923	0.687	2.05105e-102	Astrocytes (2)	Acsl3	1.34352
Fbln5	1.2467e-106	6.83461	0.399	0.125	4.17669e-102	Astrocytes (2)	Fbln5	3.192
Paqr8	5.15009e-106	8.49491	0.716	0.361	1.72538e-101	Astrocytes (2)	Paqr8	1.98338
Gli21	1.46109e-105	2.01915	0.414	0.127	4.89494e-101	Astrocytes (2)	Gli2	3.25984
Fjx1	4.15313e-105	1.9817	0.488	0.18	1.39138e-100	Astrocytes (2)	Fjx1	2.71111
Lgr61	3.15445e-104	4.21923	0.368	0.105	1.05681e-99	Astrocytes (2)	Lgr6	3.50476
Lama2	7.84725e-103	4.44515	0.641	0.279	2.62899e-98	Astrocytes (2)	Lama2	2.29749
Trib2	3.83716e-102	1.3252	0.329	0.09	1.28553e-97	Astrocytes (2)	Trib2	3.65556
Gpld11	3.27045e-101	2.41501	0.677	0.338	1.09567e-96	Astrocytes (2)	Gpld1	2.00296
Hsd17b11	3.60182e-101	0.983114	0.336	0.094	1.20668e-96	Astrocytes (2)	Hsd17b11	3.57447
Smo1	9.68235e-101	0.914858	0.37	0.108	3.24378e-96	Astrocytes (2)	Smo	3.42593
Scg3	2.27047e-100	1.28038	0.681	0.35	7.60651e-96	Astrocytes (2)	Scg3	1.94571
Nr1d1	2.11953e-99	1.32299	0.314	0.085	7.10084e-95	Astrocytes (2)	Nr1d1	3.69412
Slc13a51	1.09576e-97	0.923755	0.276	0.067	3.67103e-93	Astrocytes (2)	Slc13a5	4.1194
Slc41a1	5.6483e-95	1.05873	0.349	0.105	1.89229e-90	Astrocytes (2)	Slc41a1	3.32381
Ttyh11	1.336e-94	1.8517	0.875	0.616	4.47585e-90	Astrocytes (2)	Ttyh1	1.42045
Gdf10	5.19637e-93	0.777311	0.153	0.024	1.74089e-88	Astrocytes (2)	Gdf10	6.375
Sall21	6.75962e-92	1.31567	0.357	0.111	2.26461e-87	Astrocytes (2)	Sall2	3.21622
Rdh51	4.35683e-91	0.707237	0.288	0.076	1.45963e-86	Astrocytes (2)	Rdh5	3.78947
Adhfe11	1.05981e-90	1.41103	0.376	0.121	3.55057e-86	Astrocytes (2)	Adhfe1	3.10744
Gstt1	8.7821e-89	0.666943	0.27	0.069	2.94218e-84	Astrocytes (2)	Gstt1	3.91304
Notch11	1.92805e-88	0.779747	0.335	0.1	6.45935e-84	Astrocytes (2)	Notch1	3.35
Srebf1	2.02448e-88	0.77617	0.398	0.136	6.7824e-84	Astrocytes (2)	Srebf1	2.92647
Slc9a3r1	3.45873e-88	0.505462	0.226	0.051	1.15874e-83	Astrocytes (2)	Slc9a3r1	4.43137
Pou3f3	7.22379e-88	0.950751	0.307	0.087	2.42012e-83	Astrocytes (2)	Pou3f3	3.52874
Gli31	1.00453e-87	2.69021	0.384	0.127	3.36537e-83	Astrocytes (2)	Gli3	3.02362
1110008F13Rik	6.50036e-86	0.529954	0.219	0.049	2.17775e-81	Astrocytes (2)	1110008F13Rik	4.46939
Slc27a11	4.20109e-84	1.96707	0.589	0.283	1.40745e-79	Astrocytes (2)	Slc27a1	2.08127
Rftn21	5.79765e-84	1.29851	0.371	0.124	1.94233e-79	Astrocytes (2)	Rftn2	2.99194
Slc6a91	7.58437e-83	1.37053	0.505	0.215	2.54091e-78	Astrocytes (2)	Slc6a9	2.34884
Rgma1	9.30756e-83	4.44296	0.578	0.27	3.11822e-78	Astrocytes (2)	Rgma	2.14074
Gm405781	9.56807e-83	0.692947	0.464	0.18	3.2055e-78	Astrocytes (2)	Gm40578	2.57778
Pantr1	7.53783e-81	0.546174	0.291	0.083	2.52533e-76	Astrocytes (2)	Pantr1	3.50602
Cbs	9.21156e-81	0.670153	0.284	0.081	3.08606e-76	Astrocytes (2)	Cbs	3.50617
Ctso	4.00249e-77	0.878139	0.307	0.095	1.34091e-72	Astrocytes (2)	Ctso	3.23158
Msmo1	7.64976e-77	1.27642	0.74	0.465	2.56282e-72	Astrocytes (2)	Msmo1	1.5914
Gli11	1.66414e-75	0.525945	0.239	0.062	5.57519e-71	Astrocytes (2)	Gli1	3.85484
Glud1	7.24029e-75	6.59608	0.774	0.542	2.42564e-70	Astrocytes (2)	Glud1	1.42804
Gpr179	1.04704e-74	0.920791	0.197	0.045	3.50781e-70	Astrocytes (2)	Gpr179	4.37778
Cd302	6.46658e-74	0.856924	0.252	0.069	2.16643e-69	Astrocytes (2)	Cd302	3.65217
Abhd31	1.23461e-73	1.15104	0.439	0.181	4.1362e-69	Astrocytes (2)	Abhd3	2.42541
Gm112661	2.3381e-73	1.03135	0.304	0.096	7.83309e-69	Astrocytes (2)	Gm11266	3.16667
Pax6	1.04308e-72	0.722349	0.252	0.069	3.49451e-68	Astrocytes (2)	Pax6	3.65217
Arhgef261	2.58532e-71	1.65501	0.56	0.264	8.66134e-67	Astrocytes (2)	Arhgef26	2.12121
Pmm1	1.2699e-70	2.10657	0.423	0.171	4.25442e-66	Astrocytes (2)	Pmm1	2.47368
Folh11	3.31878e-70	1.16359	0.416	0.165	1.11186e-65	Astrocytes (2)	Folh1	2.52121
Nat8f1	5.07146e-69	1.00362	0.267	0.082	1.69904e-64	Astrocytes (2)	Nat8f1	3.2561
Gramd31	4.16686e-68	0.911737	0.421	0.169	1.39598e-63	Astrocytes (2)	Gramd3	2.49112
Dbp	1.40271e-65	0.837041	0.361	0.141	4.69935e-61	Astrocytes (2)	Dbp	2.56028
Dhrs3	7.43719e-65	0.530996	0.233	0.066	2.49161e-60	Astrocytes (2)	Dhrs3	3.5303
Slc12a4	8.12098e-65	0.546267	0.221	0.06	2.72069e-60	Astrocytes (2)	Slc12a4	3.68333
Gpr146	2.20679e-64	0.628927	0.249	0.075	7.3932e-60	Astrocytes (2)	Gpr146	3.32
Itgb8	3.12675e-64	2.5934	0.504	0.233	1.04752e-59	Astrocytes (2)	Itgb8	2.16309
Slc1a41	2.18263e-60	1.46797	0.436	0.199	7.31224e-56	Astrocytes (2)	Slc1a4	2.19095
Acot111	3.26499e-59	0.696511	0.309	0.111	1.09384e-54	Astrocytes (2)	Acot11	2.78378
Ggh	1.78529e-56	0.525155	0.294	0.105	5.98108e-52	Astrocytes (2)	Ggh	2.8
Soat11	1.19226e-55	0.751882	0.454	0.216	3.99432e-51	Astrocytes (2)	Soat1	2.10185
Fads21	1.35831e-55	0.758286	0.581	0.307	4.55061e-51	Astrocytes (2)	Fads2	1.89251
Tead11	3.03365e-53	1.03819	0.435	0.199	1.01633e-48	Astrocytes (2)	Tead1	2.18593
Selenos	2.26354e-51	0.711519	0.525	0.289	7.5833e-47	Astrocytes (2)	Selenos	1.81661
Scd1	3.71781e-49	1.15214	0.308	0.124	1.24554e-44	Astrocytes (2)	Scd1	2.48387
Atp6v0e	4.32088e-49	0.915088	0.459	0.232	1.44758e-44	Astrocytes (2)	Atp6v0e	1.97845
Smox1	3.09905e-48	0.879548	0.339	0.144	1.03824e-43	Astrocytes (2)	Smox	2.35417
Proca1	4.12997e-48	0.647018	0.204	0.065	1.38362e-43	Astrocytes (2)	Proca1	3.13846
Pgm2	7.21704e-47	0.664035	0.276	0.106	2.41785e-42	Astrocytes (2)	Pgm2	2.60377
Pttg1ip	2.41159e-46	0.799636	0.354	0.16	8.07931e-42	Astrocytes (2)	Pttg1ip	2.2125
Arxes2	7.25298e-46	1.6916	0.422	0.208	2.42989e-41	Astrocytes (2)	Arxes2	2.02885
Cep85l	3.47421e-44	8.98738	0.669	0.449	1.16393e-39	Astrocytes (2)	Cep85l	1.48998
D030047H15Rik	1.58524e-41	0.925375	0.245	0.094	5.31088e-37	Astrocytes (2)	D030047H15Rik	2.60638
St3gal4	1.37952e-40	3.45375	0.546	0.353	4.62168e-36	Astrocytes (2)	St3gal4	1.54674
Mpp6	1.74392e-40	1.25938	0.819	0.613	5.84247e-36	Astrocytes (2)	Mpp6	1.33605
Gm33680	3.78016e-40	0.973071	0.214	0.076	1.26643e-35	Astrocytes (2)	Gm33680	2.81579
A330076C08Rik1	4.63588e-40	0.84323	0.184	0.06	1.55311e-35	Astrocytes (2)	A330076C08Rik	3.06667
Celrr1	9.21125e-40	1.06608	0.217	0.078	3.08595e-35	Astrocytes (2)	Celrr	2.78205
Megf101	2.87006e-39	0.882235	0.36	0.172	9.61529e-35	Astrocytes (2)	Megf10	2.09302
Eci2	6.10327e-38	0.840689	0.297	0.132	2.04472e-33	Astrocytes (2)	Eci2	2.25
Gna13	4.77964e-37	2.34801	0.435	0.242	1.60127e-32	Astrocytes (2)	Gna13	1.79752
Baalc	2.15833e-35	0.582055	0.283	0.126	7.23084e-31	Astrocytes (2)	Baalc	2.24603
Arap21	1.61455e-34	3.04586	0.553	0.336	5.40907e-30	Astrocytes (2)	Arap2	1.64583
Tpmt	3.46695e-33	0.507023	0.197	0.075	1.1615e-28	Astrocytes (2)	Tpmt	2.62667
Tbc1d10a	1.22106e-32	0.660895	0.246	0.106	4.09079e-28	Astrocytes (2)	Tbc1d10a	2.32075
Fgd61	3.45154e-32	2.03887	0.318	0.155	1.15634e-27	Astrocytes (2)	Fgd6	2.05161
Zfp36l2	7.68281e-32	0.749033	0.232	0.098	2.57389e-27	Astrocytes (2)	Zfp36l2	2.36735
Nat8f3	3.65099e-31	0.864442	0.165	0.059	1.22315e-26	Astrocytes (2)	Nat8f3	2.79661
Dock1	3.86257e-31	2.68567	0.558	0.345	1.29404e-26	Astrocytes (2)	Dock1	1.61739
Slc30a9	1.40434e-30	13.1874	0.222	0.425	4.70483e-26	Astrocytes (2)	Slc30a9	0.522353
Cdk8	2.28527e-29	17.7832	0.783	0.765	7.6561e-25	Astrocytes (2)	Cdk8	1.02353
Abcd21	8.98406e-29	1.54881	0.284	0.137	3.00984e-24	Astrocytes (2)	Abcd2	2.07299
Adamts91	1.66001e-26	1.81736	0.19	0.078	5.56137e-22	Astrocytes (2)	Adamts9	2.4359
Ddhd1	1.13496e-23	7.76232	0.771	0.646	3.80235e-19	Astrocytes (2)	Ddhd1	1.1935
Abhd14b	2.6736e-23	0.654871	0.335	0.191	8.95709e-19	Astrocytes (2)	Abhd14b	1.75393
Lamp2	4.6328e-21	1.30138	0.572	0.417	1.55208e-16	Astrocytes (2)	Lamp2	1.3717
Nim1k1	7.89173e-21	1.32204	0.456	0.299	2.64389e-16	Astrocytes (2)	Nim1k	1.52508
Vezf1	1.01795e-20	0.669717	0.377	0.234	3.41032e-16	Astrocytes (2)	Vezf1	1.61111
Tmc71	3.55793e-19	3.10983	0.394	0.256	1.19198e-14	Astrocytes (2)	Tmc7	1.53906
2023-03-02	6.08635e-19	0.521667	0.262	0.145	2.03905e-14	Astrocytes (2)	2023-03-02	1.8069
Slc20a2	3.90521e-18	2.00349	0.53	0.381	1.30832e-13	Astrocytes (2)	Slc20a2	1.39108
Tmed5	1.70593e-17	1.34941	0.374	0.241	5.7152e-13	Astrocytes (2)	Tmed5	1.55187
Cadm4	2.67768e-17	0.522353	0.36	0.227	8.97075e-13	Astrocytes (2)	Cadm4	1.5859
Cyp7b1	1.0479e-16	1.10906	0.449	0.298	3.51068e-12	Astrocytes (2)	Cyp7b1	1.50671
Gm10069	2.75706e-16	8.61888	0.03	0.134	9.23672e-12	Astrocytes (2)	Gm10069	0.223881
Slc25a33	1.05133e-15	0.569438	0.246	0.141	3.52218e-11	Astrocytes (2)	Slc25a33	1.74468
Elmo21	1.53986e-15	0.586177	0.361	0.239	5.15883e-11	Astrocytes (2)	Elmo2	1.51046
Tob2	1.99113e-15	0.657452	0.211	0.113	6.67069e-11	Astrocytes (2)	Tob2	1.86726
Grb2	6.78775e-15	0.972629	0.172	0.302	2.27403e-10	Astrocytes (2)	Grb2	0.569536
Nufip2	6.85152e-15	11.9448	0.319	0.451	2.2954e-10	Astrocytes (2)	Nufip2	0.707317
Hacd21	6.71665e-14	2.93983	0.523	0.396	2.25021e-09	Astrocytes (2)	Hacd2	1.32071
Them4	8.70118e-14	4.5779	0.204	0.115	2.91507e-09	Astrocytes (2)	Them4	1.77391
Ahcyl1	1.30242e-13	2.97999	0.681	0.572	4.36336e-09	Astrocytes (2)	Ahcyl1	1.19056
Ivd	6.81123e-13	1.17104	0.447	0.334	2.2819e-08	Astrocytes (2)	Ivd	1.33832
Ube2s	1.48398e-12	4.26883	0.058	0.153	4.97161e-08	Astrocytes (2)	Ube2s	0.379085
1110004F10Rik	4.48302e-12	1.06887	0.414	0.302	1.5019e-07	Astrocytes (2)	1110004F10Rik	1.37086
Rhoq1	2.35329e-09	0.791617	0.352	0.255	7.884e-05	Astrocytes (2)	Rhoq	1.38039
Gm48099	7.30952e-09	7.00457	0.184	0.113	0.000244883	Astrocytes (2)	Gm48099	1.62832
Ncan	1.59683e-08	0.562133	0.304	0.217	0.000534971	Astrocytes (2)	Ncan	1.40092
Adk1	1.6677e-08	1.90287	0.713	0.611	0.000558711	Astrocytes (2)	Adk	1.16694
Magt1	8.79894e-08	0.501743	0.236	0.162	0.00294782	Astrocytes (2)	Magt1	1.45679
Apopt1	5.64525e-07	0.629071	0.142	0.219	0.0189127	Astrocytes (2)	Apopt1	0.648402
Flt1	0	204.137	0.888	0.005	0	Endothelial	Flt1	177.6
Slco1a4	0	108.991	0.809	0.004	0	Endothelial	Slco1a4	202.25
Slco1c1	0	78.6177	0.781	0.034	0	Endothelial	Slco1c1	22.9706
Abcb1a	0	75.8399	0.73	0.009	0	Endothelial	Abcb1a	81.1111
Cldn5	0	75.8168	0.795	0.002	0	Endothelial	Cldn5	397.5
Ptprb	0	73.3614	0.679	0.023	0	Endothelial	Ptprb	29.5217
Adgrl4	0	64.3737	0.735	0.004	0	Endothelial	Adgrl4	183.75
Fli1	0	55.9694	0.628	0.047	0	Endothelial	Fli1	13.3617
Mecom	0	49.367	0.74	0.013	0	Endothelial	Mecom	56.9231
Itm2a	0	47.5784	0.605	0.009	0	Endothelial	Itm2a	67.2222
Hmcn1	0	42.6274	0.656	0.019	0	Endothelial	Hmcn1	34.5263
Rgs5	0	36.8756	0.409	0.004	0	Endothelial	Rgs5	102.25
Adgrf5	0	36.2121	0.66	0.015	0	Endothelial	Adgrf5	44
Ly6c1	0	27.338	0.549	0.001	0	Endothelial	Ly6c1	549
Ndnf	0	26.3714	0.367	0.005	0	Endothelial	Ndnf	73.4
Eng	0	25.3831	0.544	0.014	0	Endothelial	Eng	38.8571
Ly6a	0	24.0681	0.451	0.001	0	Endothelial	Ly6a	451
Ets1	0	23.7787	0.526	0.02	0	Endothelial	Ets1	26.3
Kdr	0	22.5385	0.433	0.003	0	Endothelial	Kdr	144.333
Itga1	0	22.1967	0.507	0.025	0	Endothelial	Itga1	20.28
Jcad	0	20.0392	0.535	0.019	0	Endothelial	Jcad	28.1579
Klf2	0	15.8397	0.493	0.008	0	Endothelial	Klf2	61.625
Slc22a8	0	15.4328	0.586	0.005	0	Endothelial	Slc22a8	117.2
Zfp366	0	15.3475	0.521	0.001	0	Endothelial	Zfp366	521
Slc40a1	0	15.2538	0.447	0.014	0	Endothelial	Slc40a1	31.9286
Emcn	0	14.3027	0.465	0.006	0	Endothelial	Emcn	77.5
Cavin1	0	13.797	0.265	0.007	0	Endothelial	Cavin1	37.8571
Id1	0	13.696	0.442	0.016	0	Endothelial	Id1	27.625
Nostrin	0	13.5142	0.595	0.005	0	Endothelial	Nostrin	119
Palmd	0	12.602	0.516	0.02	0	Endothelial	Palmd	25.8
Pecam1	0	11.6039	0.577	0.032	0	Endothelial	Pecam1	18.0312
Car4	0	11.3481	0.447	0.011	0	Endothelial	Car4	40.6364
Cd93	0	11.1916	0.265	0.001	0	Endothelial	Cd93	265
Cgnl1	0	11.1611	0.46	0.009	0	Endothelial	Cgnl1	51.1111
Podxl	0	11.1214	0.516	0.016	0	Endothelial	Podxl	32.25
Esam	0	9.60134	0.512	0.013	0	Endothelial	Esam	39.3846
4930578C19Rik	0	9.56782	0.153	0	0	Endothelial	4930578C19Rik	Inf
Slfn5	0	8.41758	0.381	0.005	0	Endothelial	Slfn5	76.2
Clec2d	0	7.62525	0.437	0.008	0	Endothelial	Clec2d	54.625
Nes	0	7.20033	0.321	0.004	0	Endothelial	Nes	80.25
Ndufa4l2	0	7.07609	0.158	0.002	0	Endothelial	Ndufa4l2	79
Osmr	0	6.89622	0.26	0.002	0	Endothelial	Osmr	130
Fcgrt	0	6.70825	0.307	0.009	0	Endothelial	Fcgrt	34.1111
Fgd5	0	6.44482	0.53	0.031	0	Endothelial	Fgd5	17.0968
Higd1b	0	6.24854	0.158	0.002	0	Endothelial	Higd1b	79
Srgn	0	5.98411	0.335	0.007	0	Endothelial	Srgn	47.8571
Erg	0	5.83399	0.451	0.003	0	Endothelial	Erg	150.333
Cav1	0	5.69956	0.326	0.007	0	Endothelial	Cav1	46.5714
Itih5	0	5.57203	0.605	0.042	0	Endothelial	Itih5	14.4048
Xdh	0	5.48947	0.298	0.008	0	Endothelial	Xdh	37.25
Klf4	0	5.47152	0.284	0.008	0	Endothelial	Klf4	35.5
Apcdd1	0	5.40268	0.488	0.024	0	Endothelial	Apcdd1	20.3333
Ctla2a	0	5.22068	0.158	0.001	0	Endothelial	Ctla2a	158
Cd34	0	4.67697	0.4	0.012	0	Endothelial	Cd34	33.3333
Acvrl1	0	4.53139	0.372	0.014	0	Endothelial	Acvrl1	26.5714
Sp100	0	4.45287	0.335	0.006	0	Endothelial	Sp100	55.8333
Cdh5	0	4.45029	0.428	0.003	0	Endothelial	Cdh5	142.667
Tie1	0	4.27885	0.307	0.001	0	Endothelial	Tie1	307
Foxq1	0	4.16634	0.27	0.001	0	Endothelial	Foxq1	270
Dipk2b	0	3.02213	0.135	0	0	Endothelial	Dipk2b	Inf
Gch1	0	2.87831	0.237	0.003	0	Endothelial	Gch1	79
Tnfsf10	0	2.81836	0.214	0.003	0	Endothelial	Tnfsf10	71.3333
Sox17	0	2.69467	0.251	0	0	Endothelial	Sox17	Inf
Tbx3	0	2.46994	0.237	0.001	0	Endothelial	Tbx3	237
Ushbp1	0	2.41954	0.34	0.011	0	Endothelial	Ushbp1	30.9091
C130074G19Rik	0	2.28432	0.265	0.001	0	Endothelial	C130074G19Rik	265
Gimap6	0	2.25389	0.237	0.002	0	Endothelial	Gimap6	118.5
She	0	2.24427	0.265	0.001	0	Endothelial	She	265
Paqr5	0	2.21709	0.409	0.018	0	Endothelial	Paqr5	22.7222
Robo4	0	2.18814	0.247	0.001	0	Endothelial	Robo4	247
Layn	0	2.08434	0.302	0.009	0	Endothelial	Layn	33.5556
Vwf	0	1.99982	0.2	0.002	0	Endothelial	Vwf	100
Slc38a5	0	1.97626	0.177	0	0	Endothelial	Slc38a5	Inf
Srarp	0	1.89543	0.265	0	0	Endothelial	Srarp	Inf
Gbp3	0	1.51994	0.163	0.002	0	Endothelial	Gbp3	81.5
Icam2	0	1.37904	0.186	0	0	Endothelial	Icam2	Inf
Wfdc1	0	1.36312	0.279	0.005	0	Endothelial	Wfdc1	55.8
1700018A04Rik	0	1.35145	0.251	0.001	0	Endothelial	1700018A04Rik	251
Adcy4	0	1.31683	0.167	0	0	Endothelial	Adcy4	Inf
Abcc6	0	1.24452	0.177	0.001	0	Endothelial	Abcc6	177
Sox18	0	1.15527	0.144	0	0	Endothelial	Sox18	Inf
Gata2	0	1.07393	0.177	0	0	Endothelial	Gata2	Inf
Slc35f2	0	1.03151	0.2	0.003	0	Endothelial	Slc35f2	66.6667
Tinagl1	0	1.01826	0.186	0	0	Endothelial	Tinagl1	Inf
AW112010	0	0.874525	0.144	0.001	0	Endothelial	AW112010	144
Ccm2l	0	0.778649	0.167	0.001	0	Endothelial	Ccm2l	167
AU021092	0	0.68062	0.205	0.001	0	Endothelial	AU021092	205
Iigp1	0	0.62453	0.121	0.001	0	Endothelial	Iigp1	121
Tbx1	0	0.584303	0.121	0	0	Endothelial	Tbx1	Inf
Foxf2	0	0.5825	0.177	0.001	0	Endothelial	Foxf2	177
Rasip1	5.88717e-306	5.41481	0.386	0.018	1.97232e-301	Endothelial	Rasip1	21.4444
Grap	1.02592e-305	0.845969	0.186	0.003	3.43703e-301	Endothelial	Grap	62
Bvht	7.93166e-303	1.02545	0.126	0.001	2.65726e-298	Endothelial	Bvht	126
Ahnak	9.44063e-302	2.29019	0.428	0.022	3.1628e-297	Endothelial	Ahnak	19.4545
Flt4	7.44099e-299	0.596976	0.195	0.004	2.49288e-294	Endothelial	Flt4	48.75
Abcg2	8.78751e-290	16.6763	0.619	0.053	2.94399e-285	Endothelial	Abcg2	11.6792
Gm20631	1.23914e-284	1.79774	0.214	0.005	4.15137e-280	Endothelial	Gm20631	42.8
Clec14a	1.27671e-281	1.34746	0.205	0.005	4.27723e-277	Endothelial	Clec14a	41
Ebf1	2.78047e-274	12.3358	0.791	0.091	9.31513e-270	Endothelial	Ebf1	8.69231
Rnf125	1.02072e-272	0.590533	0.177	0.003	3.41963e-268	Endothelial	Rnf125	59
Edn1	4.94021e-267	0.544729	0.102	0.001	1.65507e-262	Endothelial	Edn1	102
Ramp2	3.10314e-263	14.1668	0.409	0.024	1.03961e-258	Endothelial	Ramp2	17.0417
Foxc1	4.3323e-262	1.62087	0.214	0.006	1.45141e-257	Endothelial	Foxc1	35.6667
Thbd	8.06185e-261	0.896059	0.158	0.003	2.70088e-256	Endothelial	Thbd	52.6667
Lsr	6.4311e-257	4.6556	0.367	0.019	2.15455e-252	Endothelial	Lsr	19.3158
Gm609	7.67529e-254	0.552412	0.116	0.001	2.57137e-249	Endothelial	Gm609	116
Vtn	1.47117e-251	59.9422	0.251	0.009	4.92871e-247	Endothelial	Vtn	27.8889
Mill2	1.70422e-250	2.61009	0.349	0.018	5.70949e-246	Endothelial	Mill2	19.3889
Pgm5	1.99986e-242	3.79397	0.293	0.013	6.69994e-238	Endothelial	Pgm5	22.5385
Grrp1	3.85292e-234	0.670351	0.181	0.004	1.2908e-229	Endothelial	Grrp1	45.25
Nos3	6.20006e-233	1.91524	0.312	0.015	2.07714e-228	Endothelial	Nos3	20.8
Rab11fip1	1.06321e-230	2.03968	0.209	0.006	3.56198e-226	Endothelial	Rab11fip1	34.8333
Kcnj8	2.59791e-229	8.32819	0.112	0.001	8.70351e-225	Endothelial	Kcnj8	112
Scarf1	1.1911e-228	0.53899	0.172	0.004	3.99043e-224	Endothelial	Scarf1	43
Gm35572	8.97978e-226	1.13676	0.116	0.002	3.00841e-221	Endothelial	Gm35572	58
Bcam	1.08079e-224	2.70527	0.256	0.01	3.62085e-220	Endothelial	Bcam	25.6
Pglyrp1	8.76241e-222	13.0721	0.409	0.029	2.93558e-217	Endothelial	Pglyrp1	14.1034
Flvcr2	7.99584e-210	1.48085	0.26	0.011	2.67876e-205	Endothelial	Flvcr2	23.6364
Tbx3os1	2.2179e-207	4.57519	0.167	0.004	7.43042e-203	Endothelial	Tbx3os1	41.75
Tagln2	1.04353e-205	1.17018	0.237	0.01	3.49603e-201	Endothelial	Tagln2	23.7
B630019A10Rik	2.4144e-205	0.647751	0.167	0.004	8.08873e-201	Endothelial	B630019A10Rik	41.75
Rbpms	1.09199e-203	10.1562	0.474	0.042	3.65839e-199	Endothelial	Rbpms	11.2857
Cxcl12	5.53612e-203	48.4849	0.493	0.047	1.85471e-198	Endothelial	Cxcl12	10.4894
Hspb1	8.89916e-203	2.11618	0.321	0.019	2.9814e-198	Endothelial	Hspb1	16.8947
Egfl7	5.71558e-200	19.587	0.367	0.025	1.91483e-195	Endothelial	Egfl7	14.68
Adgre5	9.63863e-199	2.35452	0.367	0.025	3.22913e-194	Endothelial	Adgre5	14.68
Thsd1	4.13949e-183	7.92139	0.363	0.027	1.38681e-178	Endothelial	Thsd1	13.4444
Anxa3	8.74452e-183	2.60437	0.395	0.031	2.92959e-178	Endothelial	Anxa3	12.7419
Rsad2	4.87707e-179	1.87429	0.116	0.002	1.63392e-174	Endothelial	Rsad2	58
Arhgap29	9.6733e-179	21.0514	0.493	0.053	3.24075e-174	Endothelial	Arhgap29	9.30189
Abcc4	2.00203e-177	8.62092	0.647	0.093	6.70719e-173	Endothelial	Abcc4	6.95699
Hmgcs2	5.51987e-177	1.59563	0.2	0.008	1.84927e-172	Endothelial	Hmgcs2	25
Proser2	9.56164e-177	1.01712	0.177	0.006	3.20334e-172	Endothelial	Proser2	29.5
Car5a	1.03373e-175	0.672274	0.121	0.003	3.4632e-171	Endothelial	Car5a	40.3333
Samd9l	2.76968e-173	1.0345	0.205	0.008	9.27898e-169	Endothelial	Samd9l	25.625
Clic5	2.21195e-169	6.45466	0.4	0.036	7.41047e-165	Endothelial	Clic5	11.1111
Igsf5	1.24683e-166	0.598383	0.121	0.003	4.17712e-162	Endothelial	Igsf5	40.3333
Tns1	2.49238e-166	16.4541	0.498	0.058	8.34996e-162	Endothelial	Tns1	8.58621
Acer2	2.54541e-166	4.44068	0.293	0.019	8.52762e-162	Endothelial	Acer2	15.4211
Slc2a1	4.21806e-165	6.41758	0.679	0.117	1.41314e-160	Endothelial	Slc2a1	5.80342
Arhgap31	7.43177e-165	16.2145	0.614	0.09	2.48979e-160	Endothelial	Arhgap31	6.82222
Gjc1	7.40298e-164	3.34225	0.312	0.022	2.48015e-159	Endothelial	Gjc1	14.1818
Slc7a5	3.14791e-160	15.3384	0.526	0.067	1.05461e-155	Endothelial	Slc7a5	7.85075
Kank3	1.72483e-158	9.63721	0.451	0.049	5.77852e-154	Endothelial	Kank3	9.20408
Fzd6	1.87879e-158	12.2523	0.414	0.041	6.29431e-154	Endothelial	Fzd6	10.0976
Grasp	2.22738e-157	2.06444	0.256	0.015	7.46217e-153	Endothelial	Grasp	17.0667
Tek	3.48149e-153	13.7095	0.544	0.075	1.16637e-148	Endothelial	Tek	7.25333
Carmn	2.38332e-152	4.10773	0.126	0.003	7.98461e-148	Endothelial	Carmn	42
Ifitm1	1.03454e-151	1.04485	0.116	0.003	3.46591e-147	Endothelial	Ifitm1	38.6667
Ddc	3.00288e-144	3.36569	0.316	0.026	1.00602e-139	Endothelial	Ddc	12.1538
Gbp5	1.35629e-142	0.570375	0.107	0.003	4.54385e-138	Endothelial	Gbp5	35.6667
Cnn2	3.16528e-142	1.23361	0.167	0.007	1.06043e-137	Endothelial	Cnn2	23.8571
Notch4	1.15929e-140	0.517836	0.149	0.005	3.88385e-136	Endothelial	Notch4	29.8
Epas1	5.53993e-138	28.5464	0.535	0.081	1.85599e-133	Endothelial	Epas1	6.60494
Vwa1	3.15188e-132	10.9107	0.372	0.039	1.05594e-127	Endothelial	Vwa1	9.53846
Sema7a	8.32889e-132	2.23418	0.386	0.042	2.79034e-127	Endothelial	Sema7a	9.19048
Ly6e	1.52947e-131	6.58222	0.558	0.092	5.12404e-127	Endothelial	Ly6e	6.06522
Apold1	4.16424e-131	13.352	0.251	0.018	1.3951e-126	Endothelial	Apold1	13.9444
Pik3r6	7.75871e-131	0.642597	0.195	0.01	2.59932e-126	Endothelial	Pik3r6	19.5
Gbp7	3.97863e-128	1.827	0.186	0.01	1.33292e-123	Endothelial	Gbp7	18.6
Cavin2	9.10653e-128	10.8572	0.247	0.018	3.05087e-123	Endothelial	Cavin2	13.7222
Afap1l1	6.04512e-126	5.79935	0.484	0.068	2.02524e-121	Endothelial	Afap1l1	7.11765
Tspo	1.95267e-125	1.89929	0.214	0.013	6.54183e-121	Endothelial	Tspo	16.4615
Arap3	6.94116e-124	0.880816	0.214	0.013	2.32543e-119	Endothelial	Arap3	16.4615
Def6	2.38761e-121	0.82993	0.163	0.008	7.99896e-117	Endothelial	Def6	20.375
Nfkbia	2.6005e-121	4.64118	0.395	0.048	8.71218e-117	Endothelial	Nfkbia	8.22917
Slc39a8	5.82743e-121	1.24459	0.172	0.009	1.95231e-116	Endothelial	Slc39a8	19.1111
Lama4	1.68848e-120	5.33492	0.302	0.028	5.65674e-116	Endothelial	Lama4	10.7857
Fas	1.86119e-118	0.877036	0.177	0.01	6.23534e-114	Endothelial	Fas	17.7
Net1	8.13703e-117	2.76555	0.27	0.023	2.72607e-112	Endothelial	Net1	11.7391
Rasgrp3	3.98464e-116	21.7211	0.516	0.083	1.33493e-111	Endothelial	Rasgrp3	6.21687
Gm9946	6.2569e-114	1.0351	0.102	0.003	2.09619e-109	Endothelial	Gm9946	34
Tgm2	7.55048e-114	0.764313	0.191	0.012	2.52956e-109	Endothelial	Tgm2	15.9167
Vamp5	2.06832e-113	0.823663	0.26	0.022	6.92929e-109	Endothelial	Vamp5	11.8182
Gcnt2	3.4758e-113	5.75527	0.34	0.037	1.16446e-108	Endothelial	Gcnt2	9.18919
Abcc9	9.70056e-112	10.6705	0.163	0.009	3.24988e-107	Endothelial	Abcc9	18.1111
Swap70	1.13263e-111	3.14981	0.26	0.022	3.79453e-107	Endothelial	Swap70	11.8182
Ocln	1.16015e-111	3.83588	0.4	0.053	3.88674e-107	Endothelial	Ocln	7.54717
Trim25	3.36972e-111	1.85446	0.209	0.014	1.12892e-106	Endothelial	Trim25	14.9286
Cox4i2	2.36462e-107	8.18672	0.112	0.004	7.92197e-103	Endothelial	Cox4i2	28
BC028528	2.14615e-106	2.29097	0.27	0.025	7.19005e-102	Endothelial	BC028528	10.8
Hspa12b	5.19937e-106	3.20192	0.377	0.049	1.74189e-101	Endothelial	Hspa12b	7.69388
Lnx2	6.06331e-103	1.97461	0.316	0.035	2.03133e-98	Endothelial	Lnx2	9.02857
Cmtm8	3.1329e-101	2.39623	0.251	0.023	1.04958e-96	Endothelial	Cmtm8	10.913
Pdgfd	1.18591e-100	9.15925	0.484	0.082	3.97304e-96	Endothelial	Pdgfd	5.90244
Dock6	3.39228e-99	6.24469	0.358	0.047	1.13648e-94	Endothelial	Dock6	7.61702
St3gal6	1.21597e-96	1.12164	0.623	0.148	4.07376e-92	Endothelial	St3gal6	4.20946
Hspg2	1.8059e-95	0.892049	0.195	0.015	6.05012e-91	Endothelial	Hspg2	13
St8sia4	2.26721e-95	13.4151	0.507	0.1	7.59562e-91	Endothelial	St8sia4	5.07
Tmem204	1.85797e-94	4.60483	0.302	0.035	6.22457e-90	Endothelial	Tmem204	8.62857
Cyyr1	2.19831e-94	5.11733	0.642	0.159	7.36478e-90	Endothelial	Cyyr1	4.03774
Fzd4	1.26333e-89	1.33283	0.186	0.014	4.23242e-85	Endothelial	Fzd4	13.2857
Mmp28	4.63193e-89	1.06069	0.186	0.014	1.55179e-84	Endothelial	Mmp28	13.2857
St6galnac2	8.30061e-89	0.664653	0.214	0.019	2.78087e-84	Endothelial	St6galnac2	11.2632
Eogt	2.53646e-88	5.65691	0.479	0.091	8.49766e-84	Endothelial	Eogt	5.26374
Crip1	4.09786e-87	7.81422	0.158	0.01	1.37287e-82	Endothelial	Crip1	15.8
Lama5	1.11529e-86	0.563109	0.181	0.014	3.73644e-82	Endothelial	Lama5	12.9286
Slc9a3r2	3.02589e-86	8.47207	0.395	0.065	1.01374e-81	Endothelial	Slc9a3r2	6.07692
Calcrl	3.07312e-86	4.50715	0.363	0.053	1.02956e-81	Endothelial	Calcrl	6.84906
Ucp2	1.8762e-84	2.82323	0.242	0.025	6.28566e-80	Endothelial	Ucp2	9.68
H2-D1	2.31261e-84	4.34257	0.381	0.062	7.7477e-80	Endothelial	H2-D1	6.14516
Ctsh	5.77694e-84	0.516951	0.316	0.042	1.93539e-79	Endothelial	Ctsh	7.52381
Rnf144b	2.46077e-83	2.35366	0.33	0.047	8.24409e-79	Endothelial	Rnf144b	7.02128
Ptpn14	3.80873e-83	2.17119	0.214	0.02	1.276e-78	Endothelial	Ptpn14	10.7
Ly75	1.22669e-81	1.00785	0.172	0.013	4.10964e-77	Endothelial	Ly75	13.2308
Mfsd2a	1.68017e-81	1.29414	0.302	0.04	5.62889e-77	Endothelial	Mfsd2a	7.55
Lamb2	1.65448e-80	4.12496	0.279	0.035	5.54283e-76	Endothelial	Lamb2	7.97143
Cobll1	1.31244e-79	45.3632	0.577	0.151	4.39693e-75	Endothelial	Cobll1	3.82119
Ccdc141	3.40495e-79	66.8735	0.684	0.225	1.14073e-74	Endothelial	Ccdc141	3.04
Heg1	5.51102e-79	18.0202	0.586	0.159	1.8463e-74	Endothelial	Heg1	3.68553
Ddx60	9.19698e-79	0.525846	0.153	0.011	3.08117e-74	Endothelial	Ddx60	13.9091
4930523C07Rik	1.66331e-78	1.38344	0.158	0.012	5.57242e-74	Endothelial	4930523C07Rik	13.1667
Cav2	1.11184e-76	1.04561	0.26	0.032	3.72489e-72	Endothelial	Cav2	8.125
Rai14	3.3619e-75	2.04992	0.349	0.056	1.1263e-70	Endothelial	Rai14	6.23214
Slc7a1	5.77881e-75	20.3164	0.53	0.131	1.93602e-70	Endothelial	Slc7a1	4.0458
Slc19a3	5.8386e-75	0.917494	0.205	0.02	1.95605e-70	Endothelial	Slc19a3	10.25
Rhoj	1.69416e-73	4.33405	0.358	0.061	5.67579e-69	Endothelial	Rhoj	5.86885
Msn	6.6569e-73	1.31134	0.284	0.039	2.2302e-68	Endothelial	Msn	7.28205
Adgra2	7.90521e-73	1.04602	0.284	0.039	2.6484e-68	Endothelial	Adgra2	7.28205
Myl12a	4.13309e-72	1.48486	0.251	0.032	1.38467e-67	Endothelial	Myl12a	7.84375
Mmrn2	2.73322e-69	1.07703	0.205	0.022	9.15683e-65	Endothelial	Mmrn2	9.31818
Tmem140	7.0025e-69	1.01333	0.14	0.01	2.34598e-64	Endothelial	Tmem140	14
Kif26a	2.93955e-68	1.04903	0.195	0.02	9.84809e-64	Endothelial	Kif26a	9.75
Lrrc8c	4.88873e-68	1.69723	0.335	0.057	1.63782e-63	Endothelial	Lrrc8c	5.87719
Eva1b	1.5082e-67	1.81426	0.153	0.013	5.05278e-63	Endothelial	Eva1b	11.7692
Il10rb	1.85724e-67	6.57189	0.265	0.037	6.22212e-63	Endothelial	Il10rb	7.16216
Map3k20	8.23805e-67	4.82111	0.381	0.075	2.75991e-62	Endothelial	Map3k20	5.08
Tns2	5.22956e-65	0.914561	0.163	0.015	1.75201e-60	Endothelial	Tns2	10.8667
Cdkn1c	3.2362e-64	1.04439	0.116	0.008	1.08419e-59	Endothelial	Cdkn1c	14.5
Piezo1	3.93288e-64	0.584916	0.163	0.015	1.31759e-59	Endothelial	Piezo1	10.8667
Rras	6.6351e-64	1.01077	0.153	0.014	2.22289e-59	Endothelial	Rras	10.9286
Nod1	8.7259e-63	0.86738	0.214	0.026	2.92335e-58	Endothelial	Nod1	8.23077
Ier2	2.70677e-62	2.6632	0.223	0.029	9.06821e-58	Endothelial	Ier2	7.68966
Ddit4l	8.29665e-62	0.970184	0.116	0.008	2.77954e-57	Endothelial	Ddit4l	14.5
Fam129a	6.47078e-61	0.775261	0.135	0.011	2.16784e-56	Endothelial	Fam129a	12.2727
Afap1l2	1.13079e-60	1.40704	0.344	0.065	3.78839e-56	Endothelial	Afap1l2	5.29231
Itpr3	3.40831e-60	0.652049	0.126	0.01	1.14185e-55	Endothelial	Itpr3	12.6
Lgals9	4.79098e-60	0.79802	0.167	0.017	1.60507e-55	Endothelial	Lgals9	9.82353
Kank2	5.35392e-60	2.80002	0.237	0.033	1.79367e-55	Endothelial	Kank2	7.18182
Bsg	6.8258e-60	208.703	0.814	0.478	2.28678e-55	Endothelial	Bsg	1.70293
Utrn	1.38422e-58	55.6815	0.753	0.38	4.63742e-54	Endothelial	Utrn	1.98158
Lhfpl2	2.17153e-57	3.2174	0.405	0.092	7.27505e-53	Endothelial	Lhfpl2	4.40217
Parp14	1.88129e-56	0.508686	0.163	0.017	6.30269e-52	Endothelial	Parp14	9.58824
Gsta4	1.17987e-55	1.52747	0.251	0.039	3.95279e-51	Endothelial	Gsta4	6.4359
Golim4	1.41378e-55	4.22154	0.428	0.109	4.73643e-51	Endothelial	Golim4	3.92661
Lrrk1	4.26223e-55	1.71626	0.251	0.039	1.42793e-50	Endothelial	Lrrk1	6.4359
Lmo2	2.14129e-54	10.7534	0.335	0.069	7.17377e-50	Endothelial	Lmo2	4.85507
H2-K1	3.77931e-54	3.26394	0.344	0.072	1.26614e-49	Endothelial	H2-K1	4.77778
Klhl6	2.20212e-53	0.586541	0.13	0.012	7.37754e-49	Endothelial	Klhl6	10.8333
Pdgfb	3.58265e-53	2.81998	0.335	0.07	1.20026e-48	Endothelial	Pdgfb	4.78571
Ifih1	4.7553e-53	1.13303	0.163	0.018	1.59312e-48	Endothelial	Ifih1	9.05556
Kcp	5.43061e-53	0.671167	0.135	0.013	1.81936e-48	Endothelial	Kcp	10.3846
Itga6	1.33754e-52	17.5628	0.567	0.194	4.48103e-48	Endothelial	Itga6	2.92268
Slc30a1	1.68259e-51	3.36352	0.367	0.084	5.63701e-47	Endothelial	Slc30a1	4.36905
Rgs12	3.70497e-50	4.24137	0.386	0.096	1.24124e-45	Endothelial	Rgs12	4.02083
Plscr4	4.10943e-50	4.98874	0.316	0.065	1.37674e-45	Endothelial	Plscr4	4.86154
Sema3c	8.83706e-47	29.5728	0.637	0.269	2.96059e-42	Endothelial	Sema3c	2.36803
Ctsc	1.8111e-46	0.509558	0.186	0.026	6.06754e-42	Endothelial	Ctsc	7.15385
Ephx1	6.21846e-46	0.599049	0.177	0.024	2.08331e-41	Endothelial	Ephx1	7.375
Pon2	2.65902e-45	1.4681	0.265	0.051	8.90823e-41	Endothelial	Pon2	5.19608
Nid1	1.64902e-44	2.13685	0.116	0.011	5.52454e-40	Endothelial	Nid1	10.5455
Itpripl2	5.733e-44	1.15911	0.13	0.014	1.92067e-39	Endothelial	Itpripl2	9.28571
Dennd3	1.76366e-43	1.89793	0.307	0.069	5.9086e-39	Endothelial	Dennd3	4.44928
Atox1	2.35351e-43	2.78997	0.381	0.105	7.88472e-39	Endothelial	Atox1	3.62857
Pear1	3.0689e-43	0.538081	0.158	0.02	1.02814e-38	Endothelial	Pear1	7.9
Xaf1	5.44889e-43	0.532471	0.153	0.019	1.82549e-38	Endothelial	Xaf1	8.05263
Rhoc	6.9424e-43	1.23186	0.158	0.021	2.32584e-38	Endothelial	Rhoc	7.52381
Polk	1.24393e-42	11.8459	0.53	0.196	4.16741e-38	Endothelial	Polk	2.70408
Fxyd5	2.09958e-42	2.01996	0.265	0.054	7.03401e-38	Endothelial	Fxyd5	4.90741
Smad6	6.51948e-42	0.536983	0.135	0.016	2.18415e-37	Endothelial	Smad6	8.4375
Crybg3	5.35081e-41	2.51353	0.302	0.07	1.79263e-36	Endothelial	Crybg3	4.31429
Plat	7.84515e-41	2.21183	0.293	0.066	2.62828e-36	Endothelial	Plat	4.43939
Rin3	7.87668e-41	0.62075	0.163	0.023	2.63885e-36	Endothelial	Rin3	7.08696
Tdrp	9.79616e-41	1.07877	0.228	0.042	3.28191e-36	Endothelial	Tdrp	5.42857
Hip1	1.99685e-40	20.3026	0.647	0.32	6.68985e-36	Endothelial	Hip1	2.02188
Sgms1	2.7165e-40	36.8232	0.795	0.533	9.10082e-36	Endothelial	Sgms1	1.49156
Elk3	3.33723e-40	2.13077	0.4	0.119	1.11804e-35	Endothelial	Elk3	3.36134
Slc39a10	5.77847e-40	41.057	0.647	0.332	1.9359e-35	Endothelial	Slc39a10	1.9488
Smco4	1.38213e-39	0.600621	0.172	0.026	4.63042e-35	Endothelial	Smco4	6.61538
Tpm4	2.21887e-39	2.45151	0.321	0.081	7.43365e-35	Endothelial	Tpm4	3.96296
Ltbp4	2.56491e-39	11.8287	0.409	0.126	8.59295e-35	Endothelial	Ltbp4	3.24603
Gpcpd1	3.57595e-38	48.1098	0.758	0.502	1.19802e-33	Endothelial	Gpcpd1	1.50996
Stard8	5.26568e-38	0.938213	0.223	0.043	1.76411e-33	Endothelial	Stard8	5.18605
S1pr11	5.46819e-38	7.6607	0.428	0.135	1.83195e-33	Endothelial	S1pr1	3.17037
Tmem123	2.75937e-37	1.12244	0.228	0.045	9.24444e-33	Endothelial	Tmem123	5.06667
Igf1r	8.45138e-37	85.6351	0.833	0.67	2.83138e-32	Endothelial	Igf1r	1.24328
Ier3	1.71065e-36	1.12407	0.158	0.024	5.73102e-32	Endothelial	Ier3	6.58333
Igfbp7	2.59864e-36	3.8604	0.521	0.205	8.70598e-32	Endothelial	Igfbp7	2.54146
Jun	6.56159e-36	1.10709	0.302	0.077	2.19826e-31	Endothelial	Jun	3.92208
Clic4	1.78873e-35	5.85179	0.474	0.177	5.9926e-31	Endothelial	Clic4	2.67797
Tnfrsf19	2.85e-35	3.22113	0.4	0.128	9.54806e-31	Endothelial	Tnfrsf19	3.125
Slc16a1	4.76424e-35	5.56017	0.326	0.092	1.59612e-30	Endothelial	Slc16a1	3.54348
Notch12	2.94349e-34	1.82183	0.358	0.106	9.86127e-30	Endothelial	Notch1	3.37736
Tgfbr3	3.53436e-34	3.15285	0.391	0.125	1.18408e-29	Endothelial	Tgfbr3	3.128
Mtus1	9.55904e-34	17.0389	0.479	0.188	3.20247e-29	Endothelial	Mtus1	2.54787
Ceacam1	2.49596e-33	1.08385	0.13	0.018	8.36197e-29	Endothelial	Ceacam1	7.22222
Cbfa2t3	3.00995e-33	1.11426	0.2	0.039	1.00839e-28	Endothelial	Cbfa2t3	5.12821
Rasgrp2	6.55432e-33	1.11128	0.209	0.043	2.19583e-28	Endothelial	Rasgrp2	4.86047
Aqp11	9.35359e-33	0.719775	0.223	0.048	3.13364e-28	Endothelial	Aqp11	4.64583
Trim56	1.66696e-32	1.15293	0.135	0.02	5.58463e-28	Endothelial	Trim56	6.75
Sgms2	4.09181e-32	1.23868	0.26	0.065	1.37084e-27	Endothelial	Sgms2	4
Arl4a	8.35115e-32	3.22854	0.395	0.14	2.7978e-27	Endothelial	Arl4a	2.82143
Sh3bgrl	1.09967e-31	7.58086	0.381	0.124	3.68412e-27	Endothelial	Sh3bgrl	3.07258
Ehd2	2.52497e-31	1.16639	0.121	0.017	8.45917e-27	Endothelial	Ehd2	7.11765
Trim47	3.20654e-31	0.500184	0.13	0.019	1.07425e-26	Endothelial	Trim47	6.84211
Tbc1d4	3.49515e-31	36.4102	0.521	0.229	1.17095e-26	Endothelial	Tbc1d4	2.27511
Zic3	4.34786e-31	0.543238	0.209	0.044	1.45662e-26	Endothelial	Zic3	4.75
Il1r1	1.23572e-30	6.59523	0.191	0.038	4.1399e-26	Endothelial	Il1r1	5.02632
Cebpd	1.3516e-30	0.627921	0.112	0.014	4.52812e-26	Endothelial	Cebpd	8
Atp10a	2.44265e-30	24.8257	0.66	0.338	8.18336e-26	Endothelial	Atp10a	1.95266
Hes12	2.66778e-30	1.11672	0.26	0.065	8.93759e-26	Endothelial	Hes1	4
Mxra7	2.49203e-29	0.74805	0.186	0.038	8.3488e-25	Endothelial	Mxra7	4.89474
Ism1	2.70413e-29	2.03781	0.135	0.021	9.05937e-25	Endothelial	Ism1	6.42857
Jam2	4.51391e-29	2.23582	0.451	0.175	1.51225e-24	Endothelial	Jam2	2.57714
Fmnl3	4.55946e-29	1.88747	0.326	0.102	1.52751e-24	Endothelial	Fmnl3	3.19608
Ptprg	6.85367e-29	67.1498	0.842	0.64	2.29612e-24	Endothelial	Ptprg	1.31562
Col4a1	1.08129e-28	5.44195	0.414	0.158	3.62253e-24	Endothelial	Col4a1	2.62025
Serpinb9	1.75787e-28	0.564369	0.116	0.017	5.88922e-24	Endothelial	Serpinb9	6.82353
Slc16a12	2.28139e-28	9.50585	0.116	0.017	7.6431e-24	Endothelial	Slc16a12	6.82353
Zbtb46	2.29313e-28	1.06767	0.274	0.076	7.68246e-24	Endothelial	Zbtb46	3.60526
Shroom4	2.46502e-28	1.71952	0.386	0.133	8.25831e-24	Endothelial	Shroom4	2.90226
Sipa1	5.00465e-28	0.838682	0.209	0.048	1.67666e-23	Endothelial	Sipa1	4.35417
Gpr1461	8.66534e-28	0.932359	0.279	0.079	2.90306e-23	Endothelial	Gpr146	3.53165
Slc6a6	8.75194e-28	55.7658	0.693	0.432	2.93208e-23	Endothelial	Slc6a6	1.60417
Cd59a	1.68938e-27	1.03788	0.205	0.046	5.65976e-23	Endothelial	Cd59a	4.45652
Rhobtb1	2.11796e-27	4.38101	0.414	0.158	7.09557e-23	Endothelial	Rhobtb1	2.62025
Kank4	6.1144e-27	0.88614	0.112	0.016	2.04845e-22	Endothelial	Kank4	7
Myo101	2.36779e-26	7.04919	0.577	0.306	7.93256e-22	Endothelial	Myo10	1.88562
Colgalt2	2.84364e-26	2.51694	0.251	0.068	9.52676e-22	Endothelial	Colgalt2	3.69118
Prkd2	5.73957e-26	1.67637	0.26	0.073	1.92287e-21	Endothelial	Prkd2	3.56164
Ldlrad3	1.46083e-25	3.71996	0.535	0.264	4.89407e-21	Endothelial	Ldlrad3	2.02652
Kctd10	1.55999e-25	0.796782	0.177	0.038	5.22627e-21	Endothelial	Kctd10	4.65789
Serpinh1	3.14813e-24	0.792868	0.205	0.051	1.05469e-19	Endothelial	Serpinh1	4.01961
Abhd2	4.1659e-24	7.41919	0.563	0.299	1.39566e-19	Endothelial	Abhd2	1.88294
Rbms2	1.54445e-23	3.7672	0.242	0.069	5.1742e-19	Endothelial	Rbms2	3.50725
Col4a3bp	3.9126e-23	26.2113	0.637	0.415	1.3108e-18	Endothelial	Col4a3bp	1.53494
Dusp1	1.00603e-22	3.40261	0.247	0.073	3.37041e-18	Endothelial	Dusp1	3.38356
Cpt1a	1.77505e-22	1.66738	0.209	0.056	5.94678e-18	Endothelial	Cpt1a	3.73214
Nrp1	8.36009e-22	10.8771	0.437	0.2	2.8008e-17	Endothelial	Nrp1	2.185
Rpl29	1.1388e-21	3.15997	0.358	0.145	3.81522e-17	Endothelial	Rpl29	2.46897
Mindy1	1.27601e-21	1.61133	0.223	0.064	4.27488e-17	Endothelial	Mindy1	3.48438
A4galt	4.17077e-21	1.06733	0.181	0.045	1.39729e-16	Endothelial	A4galt	4.02222
Ostf1	7.94093e-21	1.40401	0.251	0.081	2.66037e-16	Endothelial	Ostf1	3.09877
Egflam	1.15355e-20	12.3189	0.251	0.081	3.86463e-16	Endothelial	Egflam	3.09877
Tfrc	2.00526e-20	7.02434	0.507	0.261	6.71803e-16	Endothelial	Tfrc	1.94253
Cp	6.91636e-20	8.87541	0.265	0.09	2.31712e-15	Endothelial	Cp	2.94444
Gbe1	9.70605e-20	3.56125	0.349	0.145	3.25172e-15	Endothelial	Gbe1	2.4069
Nr2f2	2.53586e-19	5.94891	0.177	0.048	8.49564e-15	Endothelial	Nr2f2	3.6875
Sh3tc2	3.34504e-19	1.52343	0.13	0.028	1.12066e-14	Endothelial	Sh3tc2	4.64286
Ifnar1	3.81595e-19	7.67826	0.34	0.142	1.27842e-14	Endothelial	Ifnar1	2.39437
Isyna1	4.08351e-19	1.13811	0.2	0.058	1.36806e-14	Endothelial	Isyna1	3.44828
Cd151	4.10438e-19	0.831166	0.191	0.054	1.37505e-14	Endothelial	Cd151	3.53704
Prkd3	5.78639e-19	1.00132	0.251	0.084	1.93856e-14	Endothelial	Prkd3	2.9881
Gnai2	6.67979e-19	6.55935	0.451	0.245	2.23786e-14	Endothelial	Gnai2	1.84082
Sptbn1	7.49754e-19	80.1335	0.898	0.775	2.51183e-14	Endothelial	Sptbn1	1.15871
Cfh	1.32413e-18	3.42029	0.177	0.046	4.4361e-14	Endothelial	Cfh	3.84783
Ankrd50	1.48963e-18	0.702303	0.191	0.055	4.99055e-14	Endothelial	Ankrd50	3.47273
Cast	1.94036e-18	8.7837	0.293	0.111	6.50059e-14	Endothelial	Cast	2.63964
Arhgef3	2.75331e-18	8.35159	0.321	0.13	9.22413e-14	Endothelial	Arhgef3	2.46923
Nmi	2.91563e-18	0.598768	0.13	0.029	9.76796e-14	Endothelial	Nmi	4.48276
Slc38a32	3.52674e-18	1.53868	0.265	0.093	1.18153e-13	Endothelial	Slc38a3	2.84946
Ackr3	3.52801e-18	2.80595	0.172	0.047	1.18195e-13	Endothelial	Ackr3	3.65957
Hmg20b	1.24739e-17	0.854687	0.191	0.056	4.17899e-13	Endothelial	Hmg20b	3.41071
Myl6	3.23418e-17	0.796797	0.535	0.339	1.08352e-12	Endothelial	Myl6	1.57817
Mcl1	3.99339e-17	3.20973	0.321	0.136	1.33786e-12	Endothelial	Mcl1	2.36029
Ccdc85b	5.91043e-17	1.80875	0.33	0.139	1.98011e-12	Endothelial	Ccdc85b	2.3741
Eif2ak2	1.41043e-16	1.38687	0.195	0.061	4.72523e-12	Endothelial	Eif2ak2	3.19672
Map3k1	1.7453e-16	1.70238	0.363	0.163	5.84711e-12	Endothelial	Map3k1	2.22699
Gpd2	1.80716e-16	11.1969	0.451	0.24	6.05433e-12	Endothelial	Gpd2	1.87917
Ifnar2	1.91657e-16	2.00055	0.344	0.153	6.42088e-12	Endothelial	Ifnar2	2.24837
Ddx58	2.36201e-16	0.71485	0.149	0.039	7.91322e-12	Endothelial	Ddx58	3.82051
4931406P16Rik	2.92818e-16	7.78168	0.507	0.3	9.80998e-12	Endothelial	4931406P16Rik	1.69
Ednra	7.39392e-16	1.51462	0.107	0.023	2.47711e-11	Endothelial	Ednra	4.65217
Degs2	7.60362e-16	1.07134	0.279	0.111	2.54737e-11	Endothelial	Degs2	2.51351
Trim12a	8.92533e-16	1.66949	0.163	0.046	2.99016e-11	Endothelial	Trim12a	3.54348
Pls3	1.24479e-15	3.00274	0.437	0.228	4.17029e-11	Endothelial	Pls3	1.91667
Nampt	1.71981e-15	8.05093	0.33	0.149	5.7617e-11	Endothelial	Nampt	2.21477
Arhgap27	2.25649e-15	0.621862	0.172	0.052	7.55969e-11	Endothelial	Arhgap27	3.30769
Syf2	2.70561e-15	0.643618	0.26	0.101	9.06435e-11	Endothelial	Syf2	2.57426
Rundc3b	3.94283e-15	23.9962	0.581	0.357	1.32093e-10	Endothelial	Rundc3b	1.62745
Pdgfrb	5.00737e-15	14.7659	0.181	0.06	1.67757e-10	Endothelial	Pdgfrb	3.01667
Arhgef15	5.2961e-15	0.921866	0.251	0.096	1.7743e-10	Endothelial	Arhgef15	2.61458
Psmb10	5.59706e-15	1.02988	0.181	0.057	1.87513e-10	Endothelial	Psmb10	3.17544
Smtn	6.90339e-15	0.96381	0.112	0.026	2.31277e-10	Endothelial	Smtn	4.30769
Gm40271	1.18365e-14	0.609413	0.149	0.042	3.96545e-10	Endothelial	Gm40271	3.54762
Myh9	1.70457e-14	13.7192	0.428	0.244	5.71063e-10	Endothelial	Myh9	1.7541
Gpx1	1.82058e-14	0.856543	0.195	0.067	6.09932e-10	Endothelial	Gpx1	2.91045
Rflnb	2.31135e-14	2.94959	0.279	0.119	7.74348e-10	Endothelial	Rflnb	2.34454
Crispld1	2.4039e-14	0.64496	0.13	0.034	8.05356e-10	Endothelial	Crispld1	3.82353
Alas1	2.72671e-14	1.36893	0.274	0.115	9.13504e-10	Endothelial	Alas1	2.38261
Rin2	4.06782e-14	3.51052	0.405	0.215	1.3628e-09	Endothelial	Rin2	1.88372
Lima1	5.21348e-14	0.849932	0.321	0.146	1.74662e-09	Endothelial	Lima1	2.19863
Adap2	6.00892e-14	4.48009	0.144	0.041	2.01311e-09	Endothelial	Adap2	3.5122
Wwc2	8.18239e-14	2.85424	0.437	0.25	2.74126e-09	Endothelial	Wwc2	1.748
Pald1	1.13815e-13	0.903382	0.149	0.045	3.81303e-09	Endothelial	Pald1	3.31111
Rps12-ps3	1.14228e-13	0.567501	0.153	0.047	3.82687e-09	Endothelial	Rps12-ps3	3.25532
Alpl	1.14342e-13	0.934592	0.121	0.032	3.83068e-09	Endothelial	Alpl	3.78125
Ets2	1.54456e-13	1.1431	0.2	0.071	5.1746e-09	Endothelial	Ets2	2.8169
Tnfaip1	1.74507e-13	1.74772	0.247	0.101	5.84635e-09	Endothelial	Tnfaip1	2.44554
Eif3f	1.95772e-13	1.09593	0.288	0.128	6.55875e-09	Endothelial	Eif3f	2.25
Il34	2.20753e-13	1.55376	0.144	0.043	7.39567e-09	Endothelial	Il34	3.34884
1700020I14Rik	4.18587e-13	2.15374	0.219	0.085	1.40235e-08	Endothelial	1700020I14Rik	2.57647
St6galnac3	4.92806e-13	2.61207	0.735	0.521	1.651e-08	Endothelial	St6galnac3	1.41075
Gm2000	5.09258e-13	0.827201	0.13	0.037	1.70612e-08	Endothelial	Gm2000	3.51351
AU020206	5.61713e-13	3.60316	0.102	0.024	1.88185e-08	Endothelial	AU020206	4.25
Klf3	5.77565e-13	2.51851	0.293	0.133	1.93496e-08	Endothelial	Klf3	2.20301
Mospd1	7.04486e-13	1.83291	0.181	0.064	2.36017e-08	Endothelial	Mospd1	2.82812
Slc38a11	8.2572e-13	15.4407	0.153	0.05	2.76633e-08	Endothelial	Slc38a11	3.06
Wasf2	1.07008e-12	5.0339	0.447	0.272	3.58498e-08	Endothelial	Wasf2	1.64338
Rcsd1	1.29784e-12	1.43471	0.195	0.072	4.34803e-08	Endothelial	Rcsd1	2.70833
Blvrb	1.89128e-12	0.74272	0.14	0.042	6.33615e-08	Endothelial	Blvrb	3.33333
Spock2	2.3605e-12	58.4875	0.777	0.601	7.90813e-08	Endothelial	Spock2	1.29285
Dusp3	2.75743e-12	3.45529	0.344	0.177	9.23794e-08	Endothelial	Dusp3	1.9435
Sox13	2.76712e-12	1.35423	0.195	0.072	9.27042e-08	Endothelial	Sox13	2.70833
Gm10036	3.62127e-12	2.14261	0.181	0.066	1.2132e-07	Endothelial	Gm10036	2.74242
Rnf213	9.76415e-12	9.2185	0.195	0.075	3.27119e-07	Endothelial	Rnf213	2.6
Tmem51	1.05581e-11	2.14898	0.149	0.049	3.53718e-07	Endothelial	Tmem51	3.04082
Irf2bpl	1.67985e-11	0.973074	0.242	0.105	5.62785e-07	Endothelial	Irf2bpl	2.30476
Nkd1	1.93803e-11	0.537533	0.358	0.186	6.4928e-07	Endothelial	Nkd1	1.92473
Elf1	4.51137e-11	2.71135	0.307	0.154	1.5114e-06	Endothelial	Elf1	1.99351
Shisa5	6.06414e-11	0.587194	0.167	0.061	2.03161e-06	Endothelial	Shisa5	2.7377
Elk4	8.95075e-11	0.750186	0.223	0.096	2.99868e-06	Endothelial	Elk4	2.32292
Parp4	1.17184e-10	1.04609	0.181	0.069	3.92589e-06	Endothelial	Parp4	2.62319
Cdc42ep1	2.04483e-10	0.525164	0.144	0.049	6.85059e-06	Endothelial	Cdc42ep1	2.93878
Klhl5	3.13434e-10	1.76629	0.367	0.21	1.05006e-05	Endothelial	Klhl5	1.74762
Arhgef5	5.07438e-10	0.784143	0.14	0.048	1.70002e-05	Endothelial	Arhgef5	2.91667
Hnrnpab	7.00802e-10	3.59242	0.233	0.104	2.34783e-05	Endothelial	Hnrnpab	2.24038
Rhoa	7.50888e-10	7.03338	0.451	0.303	2.51562e-05	Endothelial	Rhoa	1.48845
Smim11	1.55856e-09	0.79969	0.14	0.05	5.2215e-05	Endothelial	Smim11	2.8
Stard131	1.95224e-09	1.99936	0.358	0.199	6.54038e-05	Endothelial	Stard13	1.79899
Dazap2	2.08496e-09	0.732409	0.195	0.084	6.98502e-05	Endothelial	Dazap2	2.32143
Tspan5	2.48276e-09	21.1512	0.693	0.571	8.31775e-05	Endothelial	Tspan5	1.21366
Emp21	2.66057e-09	0.77541	0.14	0.05	8.91344e-05	Endothelial	Emp2	2.8
Psme1	3.15508e-09	1.14667	0.167	0.067	0.000105702	Endothelial	Psme1	2.49254
Gm11808	3.56477e-09	7.66072	0.256	0.137	0.000119427	Endothelial	Gm11808	1.86861
Mkl2	4.11919e-09	3.63046	0.293	0.155	0.000138001	Endothelial	Mkl2	1.89032
Tln1	5.23849e-09	1.45239	0.298	0.163	0.0001755	Endothelial	Tln1	1.82822
Ldha	5.57228e-09	0.741977	0.26	0.134	0.000186683	Endothelial	Ldha	1.9403
Col4a2	1.2866e-08	2.1575	0.353	0.213	0.000431036	Endothelial	Col4a2	1.65728
Tapbp	1.30839e-08	0.501117	0.177	0.076	0.000438337	Endothelial	Tapbp	2.32895
Shroom2	1.32751e-08	0.821221	0.237	0.118	0.000444743	Endothelial	Shroom2	2.00847
Dock11	1.67035e-08	4.48555	0.512	0.351	0.000559601	Endothelial	Dock1	1.45869
Rpsa	1.9867e-08	0.756354	0.507	0.384	0.000665585	Endothelial	Rpsa	1.32031
Prdm5	2.98596e-08	1.44395	0.274	0.143	0.00100036	Endothelial	Prdm5	1.91608
Herc6	3.68078e-08	0.743646	0.163	0.068	0.00123313	Endothelial	Herc6	2.39706
Ntn1	3.90786e-08	5.76137	0.112	0.038	0.00130921	Endothelial	Ntn1	2.94737
Arhgdia	3.93984e-08	1.52405	0.251	0.135	0.00131993	Endothelial	Arhgdia	1.85926
Akap12	4.56199e-08	4.06932	0.33	0.198	0.00152836	Endothelial	Akap12	1.66667
Ptbp3	4.92872e-08	1.19338	0.372	0.229	0.00165122	Endothelial	Ptbp3	1.62445
Slc31a1	7.26601e-08	0.664006	0.214	0.104	0.00243426	Endothelial	Slc31a1	2.05769
Zdhhc6	1.07446e-07	1.55151	0.074	0.228	0.00359967	Endothelial	Zdhhc6	0.324561
Brd9	1.40252e-07	3.49071	0.205	0.374	0.00469871	Endothelial	Brd9	0.548128
Arhgap10	1.41042e-07	4.85359	0.112	0.041	0.0047252	Endothelial	Arhgap10	2.73171
Tbc1d16	1.51932e-07	0.705958	0.098	0.254	0.00509001	Endothelial	Tbc1d16	0.385827
Nfe2l2	1.57943e-07	1.60764	0.214	0.108	0.0052914	Endothelial	Nfe2l2	1.98148
Aff1	2.14371e-07	2.06716	0.284	0.161	0.00718185	Endothelial	Aff1	1.76398
Tmod3	2.15788e-07	2.04667	0.381	0.243	0.00722933	Endothelial	Tmod3	1.5679
Cdkn1b	2.25769e-07	0.756971	0.186	0.088	0.00756373	Endothelial	Cdkn1b	2.11364
Maoa	2.4627e-07	4.36412	0.419	0.284	0.00825054	Endothelial	Maoa	1.47535
Rif1	2.87452e-07	0.556193	0.209	0.38	0.00963023	Endothelial	Rif1	0.55
St8sia6	3.40589e-07	1.17536	0.167	0.075	0.0114104	Endothelial	St8sia6	2.22667
Ier5	3.5182e-07	0.651222	0.153	0.068	0.0117867	Endothelial	Ier5	2.25
Itga4	4.60595e-07	1.60695	0.102	0.037	0.0154309	Endothelial	Itga4	2.75676
Cflar	6.02937e-07	1.57426	0.237	0.129	0.0201996	Endothelial	Cflar	1.83721
Klf6	7.14724e-07	8.64958	0.307	0.189	0.0239447	Endothelial	Klf6	1.62434
Ecm2	7.41075e-07	3.94784	0.126	0.052	0.0248275	Endothelial	Ecm2	2.42308
Alas2	7.59415e-07	3.03494	0.023	0.142	0.0254419	Endothelial	Alas2	0.161972
Jag1	9.55444e-07	2.65365	0.121	0.049	0.0320093	Endothelial	Jag1	2.46939
Eci21	1.36218e-06	1.0934	0.247	0.136	0.0456357	Endothelial	Eci2	1.81618
Dnah12	0	250.257	0.804	0.024	0	Ependymal	Dnah12	33.5
Rarres2	0	228.966	0.597	0.056	0	Ependymal	Rarres2	10.6607
Tmem212	0	213.122	0.817	0.033	0	Ependymal	Tmem212	24.7576
Spag16	0	170.519	0.774	0.096	0	Ependymal	Spag16	8.0625
Adamts20	0	133.628	0.751	0.157	0	Ependymal	Adamts20	4.78344
Dnah6	0	131.014	0.751	0.015	0	Ependymal	Dnah6	50.0667
Spef2	0	126.547	0.748	0.046	0	Ependymal	Spef2	16.2609
Cfap299	0	120.749	0.525	0.022	0	Ependymal	Cfap299	23.8636
Ccdc153	0	115.26	0.663	0.037	0	Ependymal	Ccdc153	17.9189
3300002A11Rik	0	107.838	0.731	0.048	0	Ependymal	3300002A11Rik	15.2292
Hydin	0	107.666	0.761	0.056	0	Ependymal	Hydin	13.5893
Ccdc162	0	96.3298	0.746	0.134	0	Ependymal	Ccdc162	5.56716
Cfap44	0	95.598	0.753	0.113	0	Ependymal	Cfap44	6.66372
Ak7	0	92.008	0.731	0.025	0	Ependymal	Ak7	29.24
Wdr49	0	88.666	0.693	0.014	0	Ependymal	Wdr49	49.5
Kif6	0	87.7426	0.689	0.116	0	Ependymal	Kif6	5.93966
Ccdc146	0	77.6173	0.661	0.025	0	Ependymal	Ccdc146	26.44
Rsph1	0	76.5404	0.529	0.049	0	Ependymal	Rsph1	10.7959
Gm13481	0	74.6447	0.623	0.066	0	Ependymal	Gm13481	9.43939
Rgs22	0	74.5324	0.755	0.043	0	Ependymal	Rgs22	17.5581
Dnah11	0	73.271	0.727	0.023	0	Ependymal	Dnah11	31.6087
Dnah9	0	72.7373	0.742	0.053	0	Ependymal	Dnah9	14
Pltp	0	71.7791	0.701	0.077	0	Ependymal	Pltp	9.1039
Adgrv1	0	71.406	0.682	0.093	0	Ependymal	Adgrv1	7.33333
Ak9	0	70.443	0.678	0.011	0	Ependymal	Ak9	61.6364
Spag17	0	68.9729	0.676	0.02	0	Ependymal	Spag17	33.8
Dnah5	0	64.9619	0.663	0.043	0	Ependymal	Dnah5	15.4186
Armc4	0	63.2123	0.616	0.015	0	Ependymal	Armc4	41.0667
Gm10714	0	60.3443	0.661	0.012	0	Ependymal	Gm10714	55.0833
Lrriq1	0	58.429	0.665	0.074	0	Ependymal	Lrriq1	8.98649
Cfap61	0	58.0644	0.699	0.126	0	Ependymal	Cfap61	5.54762
Zbbx	0	57.3421	0.591	0.022	0	Ependymal	Zbbx	26.8636
Enkur	0	55.9913	0.606	0.027	0	Ependymal	Enkur	22.4444
Ccdc170	0	55.0195	0.627	0.013	0	Ependymal	Ccdc170	48.2308
Lrrc36	0	53.2126	0.678	0.007	0	Ependymal	Lrrc36	96.8571
Wdr66	0	51.5558	0.578	0.041	0	Ependymal	Wdr66	14.0976
C230072F16Rik	0	50.7121	0.631	0.005	0	Ependymal	C230072F16Rik	126.2
Wdr63	0	50.4335	0.601	0.006	0	Ependymal	Wdr63	100.167
Cfap43	0	50.1762	0.695	0.054	0	Ependymal	Cfap43	12.8704
Meig1	0	45.9085	0.418	0.021	0	Ependymal	Meig1	19.9048
Fam183b	0	45.8885	0.35	0.022	0	Ependymal	Fam183b	15.9091
Vim	0	45.7125	0.358	0.029	0	Ependymal	Vim	12.3448
Cdhr3	0	44.4769	0.644	0.011	0	Ependymal	Cdhr3	58.5455
Dnah10	0	43.0597	0.642	0.041	0	Ependymal	Dnah10	15.6585
Ttc29	0	43.0418	0.593	0.008	0	Ependymal	Ttc29	74.125
Dnah3	0	42.9357	0.665	0.029	0	Ependymal	Dnah3	22.931
Calml4	0	41.5504	0.384	0.023	0	Ependymal	Calml4	16.6957
Spata17	0	41.3951	0.627	0.054	0	Ependymal	Spata17	11.6111
1700012B09Rik	0	40.2231	0.352	0.018	0	Ependymal	1700012B09Rik	19.5556
T2	0	39.7036	0.625	0.083	0	Ependymal	T2	7.53012
Dnah7a	0	39.3594	0.612	0.085	0	Ependymal	Dnah7a	7.2
Unc5cl	0	38.9116	0.546	0.004	0	Ependymal	Unc5cl	136.5
Tm4sf1	0	38.7877	0.505	0.018	0	Ependymal	Tm4sf1	28.0556
Ezr	0	38.6474	0.448	0.033	0	Ependymal	Ezr	13.5758
Mlf1	0	37.2546	0.458	0.016	0	Ependymal	Mlf1	28.625
Armc3	0	37.2485	0.571	0.014	0	Ependymal	Armc3	40.7857
Rp1	0	37.2472	0.42	0.013	0	Ependymal	Rp1	32.3077
Rassf9	0	35.8575	0.518	0.009	0	Ependymal	Rassf9	57.5556
Cabcoco1	0	35.7814	0.475	0.016	0	Ependymal	Cabcoco1	29.6875
Drc3	0	35.5701	0.582	0.079	0	Ependymal	Drc3	7.36709
Dynlrb2	0	34.5465	0.463	0.017	0	Ependymal	Dynlrb2	27.2353
Cfap65	0	34.464	0.661	0.025	0	Ependymal	Cfap65	26.44
Vwa3a	0	34.3025	0.642	0.039	0	Ependymal	Vwa3a	16.4615
Dnah2	0	33.5856	0.646	0.067	0	Ependymal	Dnah2	9.64179
Ccdc180	0	31.5752	0.586	0.007	0	Ependymal	Ccdc180	83.7143
Hdc	0	31.5022	0.275	0.007	0	Ependymal	Hdc	39.2857
Rsph4a	0	31.4846	0.429	0.015	0	Ependymal	Rsph4a	28.6
Stpg1	0	31.4179	0.542	0.028	0	Ependymal	Stpg1	19.3571
Cfap77	0	30.4725	0.548	0.01	0	Ependymal	Cfap77	54.8
Iqca	0	30.4513	0.588	0.019	0	Ependymal	Iqca	30.9474
Fbxl13	0	30.4283	0.595	0.032	0	Ependymal	Fbxl13	18.5938
1700001C02Rik	0	30.0915	0.33	0.006	0	Ependymal	1700001C02Rik	55
Adgb	0	30.0295	0.535	0.012	0	Ependymal	Adgb	44.5833
Dthd1	0	29.6255	0.591	0.006	0	Ependymal	Dthd1	98.5
Cfap126	0	28.7454	0.335	0.016	0	Ependymal	Cfap126	20.9375
Gm19935	0	28.6694	0.399	0.017	0	Ependymal	Gm19935	23.4706
2010001K21Rik	0	28.6282	0.424	0.004	0	Ependymal	2010001K21Rik	106
Dnaic1	0	28.4107	0.548	0.059	0	Ependymal	Dnaic1	9.28814
Ttll8	0	28.2698	0.576	0.068	0	Ependymal	Ttll8	8.47059
Ttc21a	0	27.1532	0.586	0.014	0	Ependymal	Ttc21a	41.8571
Efcab11	0	27.068	0.399	0.017	0	Ependymal	Efcab11	23.4706
Sntn	0	25.7457	0.38	0.006	0	Ependymal	Sntn	63.3333
Gm12695	0	25.7452	0.412	0.002	0	Ependymal	Gm12695	206
Frmpd2	0	25.4541	0.623	0.08	0	Ependymal	Frmpd2	7.7875
Ecrg4	0	24.4533	0.215	0.009	0	Ependymal	Ecrg4	23.8889
Aebp1	0	24.3683	0.429	0.026	0	Ependymal	Aebp1	16.5
4833427G06Rik	0	24.2812	0.522	0.005	0	Ependymal	4833427G06Rik	104.4
Lrrc9	0	24.0616	0.539	0.06	0	Ependymal	Lrrc9	8.98333
1700016K19Rik	0	22.8508	0.256	0.006	0	Ependymal	1700016K19Rik	42.6667
Cfap100	0	22.8481	0.574	0.026	0	Ependymal	Cfap100	22.0769
Cfap206	0	22.8292	0.49	0.014	0	Ependymal	Cfap206	35
Gm4681	0	22.6349	0.441	0.045	0	Ependymal	Gm4681	9.8
Cd24a	0	22.4772	0.29	0.009	0	Ependymal	Cd24a	32.2222
1700024G13Rik	0	21.4501	0.277	0.008	0	Ependymal	1700024G13Rik	34.625
Crocc2	0	21.414	0.55	0.005	0	Ependymal	Crocc2	110
Musk	0	21.4032	0.365	0.007	0	Ependymal	Musk	52.1429
Cfap70	0	21.2643	0.493	0.042	0	Ependymal	Cfap70	11.7381
Lrrc23	0	20.9155	0.478	0.037	0	Ependymal	Lrrc23	12.9189
Iqub	0	20.8319	0.478	0.039	0	Ependymal	Iqub	12.2564
Maats1	0	20.7149	0.501	0.019	0	Ependymal	Maats1	26.3684
Cfap52	0	20.7063	0.458	0.023	0	Ependymal	Cfap52	19.913
Ccdc114	0	20.4721	0.561	0.033	0	Ependymal	Ccdc114	17
Cfap45	0	20.1119	0.448	0.018	0	Ependymal	Cfap45	24.8889
Foxj1	0	19.9575	0.333	0.011	0	Ependymal	Foxj1	30.2727
Tekt1	0	19.9272	0.356	0.023	0	Ependymal	Tekt1	15.4783
Lrguk	0	19.8564	0.535	0.045	0	Ependymal	Lrguk	11.8889
Lmntd1	0	19.8061	0.557	0.034	0	Ependymal	Lmntd1	16.3824
Ccdc60	0	19.4792	0.531	0.047	0	Ependymal	Ccdc60	11.2979
Dnali1	0	19.0426	0.394	0.007	0	Ependymal	Dnali1	56.2857
Lrrc74b	0	18.707	0.471	0.007	0	Ependymal	Lrrc74b	67.2857
Ccdc113	0	18.6798	0.36	0.02	0	Ependymal	Ccdc113	18
Cfap161	0	18.5723	0.367	0.011	0	Ependymal	Cfap161	33.3636
Gm867	0	18.4856	0.401	0.006	0	Ependymal	Gm867	66.8333
Slc24a4	0	18.3791	0.384	0.025	0	Ependymal	Slc24a4	15.36
Cdkl4	0	17.0073	0.452	0.026	0	Ependymal	Cdkl4	17.3846
Rfx2	0	16.9807	0.456	0.038	0	Ependymal	Rfx2	12
Endog	0	16.9521	0.52	0.053	0	Ependymal	Endog	9.81132
Lrrc71	0	16.0958	0.505	0.008	0	Ependymal	Lrrc71	63.125
Tctex1d4	0	15.8721	0.371	0.004	0	Ependymal	Tctex1d4	92.75
Ect2l	0	15.8356	0.473	0.013	0	Ependymal	Ect2l	36.3846
Daw1	0	15.7049	0.522	0.011	0	Ependymal	Daw1	47.4545
Lrrc6	0	15.6491	0.469	0.007	0	Ependymal	Lrrc6	67
Gm16201	0	15.6244	0.313	0.016	0	Ependymal	Gm16201	19.5625
Ppp1r36	0	15.3641	0.414	0.006	0	Ependymal	Ppp1r36	69
Ankub1	0	15.1739	0.458	0.045	0	Ependymal	Ankub1	10.1778
1700028P14Rik	0	14.9852	0.469	0.012	0	Ependymal	1700028P14Rik	39.0833
Efhb	0	14.9393	0.475	0.029	0	Ependymal	Efhb	16.3793
Drc7	0	14.322	0.352	0.011	0	Ependymal	Drc7	32
Erich2	0	14.2966	0.42	0.008	0	Ependymal	Erich2	52.5
2410004P03Rik	0	14.2059	0.275	0.005	0	Ependymal	2410004P03Rik	55
Sptlc3	0	14.1897	0.273	0.007	0	Ependymal	Sptlc3	39
Armh1	0	14.1683	0.412	0.018	0	Ependymal	Armh1	22.8889
Fam216b	0	13.08	0.446	0.003	0	Ependymal	Fam216b	148.667
Nek11	0	12.9947	0.529	0.068	0	Ependymal	Nek11	7.77941
Fam81b	0	12.9402	0.33	0.008	0	Ependymal	Fam81b	41.25
Nme9	0	12.841	0.399	0.01	0	Ependymal	Nme9	39.9
Spata18	0	12.8349	0.301	0.002	0	Ependymal	Spata18	150.5
Zfp474	0	12.8325	0.456	0.003	0	Ependymal	Zfp474	152
Vwa3b	0	12.8061	0.478	0.034	0	Ependymal	Vwa3b	14.0588
Cfap57	0	12.7982	0.392	0.012	0	Ependymal	Cfap57	32.6667
Tekt4	0	12.7671	0.22	0.006	0	Ependymal	Tekt4	36.6667
Gm38414	0	12.7624	0.147	0.003	0	Ependymal	Gm38414	49
Nek5	0	12.7581	0.412	0.007	0	Ependymal	Nek5	58.8571
Gm28729	0	12.7536	0.399	0.019	0	Ependymal	Gm28729	21
Fam149a	0	12.2895	0.397	0.029	0	Ependymal	Fam149a	13.6897
Igfbp2	0	12.2557	0.288	0.013	0	Ependymal	Igfbp2	22.1538
Eno4	0	11.7696	0.426	0.04	0	Ependymal	Eno4	10.65
Tsnaxip1	0	11.7149	0.384	0.023	0	Ependymal	Tsnaxip1	16.6957
Capsl	0	11.5956	0.277	0.006	0	Ependymal	Capsl	46.1667
Stoml3	0	11.5436	0.217	0.004	0	Ependymal	Stoml3	54.25
Odf3b	0	11.5302	0.35	0.008	0	Ependymal	Odf3b	43.75
Kif27	0	11.5255	0.433	0.034	0	Ependymal	Kif27	12.7353
Cfap221	0	11.5147	0.414	0.035	0	Ependymal	Cfap221	11.8286
Cdhr4	0	11.5046	0.354	0.005	0	Ependymal	Cdhr4	70.8
Lrrc43	0	11.4713	0.435	0.016	0	Ependymal	Lrrc43	27.1875
Map3k19	0	11.4439	0.486	0.047	0	Ependymal	Map3k19	10.3404
Myb	0	11.4293	0.313	0.012	0	Ependymal	Myb	26.0833
Mia	0	11.3375	0.192	0.004	0	Ependymal	Mia	48
Catip	0	11.3241	0.377	0.015	0	Ependymal	Catip	25.1333
Ccbe1	0	11.1901	0.328	0.013	0	Ependymal	Ccbe1	25.2308
Clec3b	0	10.7828	0.264	0.01	0	Ependymal	Clec3b	26.4
Gm42722	0	10.6661	0.454	0.036	0	Ependymal	Gm42722	12.6111
1700007K13Rik	0	10.3169	0.313	0.017	0	Ependymal	1700007K13Rik	18.4118
4930567H12Rik	0	9.89954	0.343	0.005	0	Ependymal	4930567H12Rik	68.6
Morn5	0	9.89002	0.237	0.007	0	Ependymal	Morn5	33.8571
Cfap53	0	9.87836	0.311	0.016	0	Ependymal	Cfap53	19.4375
Togaram2	0	9.82454	0.45	0.036	0	Ependymal	Togaram2	12.5
Iqcd	0	9.64278	0.386	0.028	0	Ependymal	Iqcd	13.7857
Casc1	0	9.48731	0.397	0.017	0	Ependymal	Casc1	23.3529
Zmynd10	0	9.00726	0.26	0.009	0	Ependymal	Zmynd10	28.8889
Ttll6	0	8.9724	0.401	0.003	0	Ependymal	Ttll6	133.667
Ankrd66	0	8.91383	0.305	0.003	0	Ependymal	Ankrd66	101.667
Ube2u	0	8.90454	0.252	0.006	0	Ependymal	Ube2u	42
Ccdc81	0	8.85138	0.356	0.023	0	Ependymal	Ccdc81	15.4783
Pih1d2	0	8.66616	0.328	0.017	0	Ependymal	Pih1d2	19.2941
Dnaic2	0	8.55225	0.284	0.018	0	Ependymal	Dnaic2	15.7778
Mdh1b	0	8.51006	0.294	0.01	0	Ependymal	Mdh1b	29.4
Cd109	0	8.46439	0.241	0.009	0	Ependymal	Cd109	26.7778
Gm47888	0	8.4291	0.377	0.005	0	Ependymal	Gm47888	75.4
Ccdc33	0	8.16937	0.288	0.004	0	Ependymal	Ccdc33	72
Ttc25	0	7.7174	0.397	0.022	0	Ependymal	Ttc25	18.0455
Efcab6	0	7.59799	0.403	0.025	0	Ependymal	Efcab6	16.12
Uox	0	7.50036	0.264	0.002	0	Ependymal	Uox	132
Ppp1r32	0	7.49577	0.203	0.004	0	Ependymal	Ppp1r32	50.75
Dnaaf3	0	7.35449	0.418	0.004	0	Ependymal	Dnaaf3	104.5
Mapk15	0	7.20098	0.343	0.004	0	Ependymal	Mapk15	85.75
Fam47e	0	7.05796	0.305	0.005	0	Ependymal	Fam47e	61
Dmkn	0	7.05015	0.269	0.005	0	Ependymal	Dmkn	53.8
Lrrc34	0	7.0123	0.2	0.005	0	Ependymal	Lrrc34	40
Ccdc121	0	6.96928	0.228	0.003	0	Ependymal	Ccdc121	76
Lbp	0	6.87973	0.405	0.006	0	Ependymal	Lbp	67.5
Paqr51	0	6.84895	0.292	0.015	0	Ependymal	Paqr5	19.4667
Gm12326	0	6.51204	0.258	0.009	0	Ependymal	Gm12326	28.6667
Efhc1	0	6.50415	0.362	0.017	0	Ependymal	Efhc1	21.2941
BC051019	0	6.39614	0.324	0.003	0	Ependymal	BC051019	108
Morn3	0	6.33307	0.309	0.01	0	Ependymal	Morn3	30.9
Wdr93	0	6.00938	0.345	0.018	0	Ependymal	Wdr93	19.1667
Dlec1	0	5.88332	0.348	0.019	0	Ependymal	Dlec1	18.3158
Cdh26	0	5.7403	0.235	0.004	0	Ependymal	Cdh26	58.75
Smim5	0	5.708	0.19	0.007	0	Ependymal	Smim5	27.1429
Ccdc150	0	5.69393	0.356	0.029	0	Ependymal	Ccdc150	12.2759
Ppp1r42	0	5.63243	0.245	0.01	0	Ependymal	Ppp1r42	24.5
Crygn	0	5.35599	0.177	0.006	0	Ependymal	Crygn	29.5
Col8a2	0	5.06904	0.292	0.011	0	Ependymal	Col8a2	26.5455
6820408C15Rik	0	5.02317	0.407	0.037	0	Ependymal	6820408C15Rik	11
Kcnmb1	0	4.92129	0.2	0.003	0	Ependymal	Kcnmb1	66.6667
Traf1	0	4.7806	0.294	0.005	0	Ependymal	Traf1	58.8
Spag8	0	4.69646	0.224	0.007	0	Ependymal	Spag8	32
Fbln7	0	4.63604	0.254	0.004	0	Ependymal	Fbln7	63.5
Gm36908	0	4.52144	0.326	0.007	0	Ependymal	Gm36908	46.5714
Trp73	0	4.46218	0.277	0.003	0	Ependymal	Trp73	92.3333
Lrrc46	0	4.44851	0.224	0.006	0	Ependymal	Lrrc46	37.3333
Lpar3	0	4.24827	0.156	0.003	0	Ependymal	Lpar3	52
Folr1	0	4.02576	0.222	0.002	0	Ependymal	Folr1	111
Tcp11	0	3.82649	0.209	0.003	0	Ependymal	Tcp11	69.6667
Barx2	0	3.75812	0.245	0.006	0	Ependymal	Barx2	40.8333
Dpy19l2	0	3.69062	0.316	0.007	0	Ependymal	Dpy19l2	45.1429
Got1l1	0	3.66372	0.198	0.003	0	Ependymal	Got1l1	66
Celsr1	0	3.63238	0.32	0.013	0	Ependymal	Celsr1	24.6154
Acot5	0	3.48433	0.16	0.001	0	Ependymal	Acot5	160
Prelp	0	3.26373	0.33	0.016	0	Ependymal	Prelp	20.625
Gm14280	0	3.2596	0.16	0.002	0	Ependymal	Gm14280	80
Dnah14	0	3.24568	0.284	0.011	0	Ependymal	Dnah14	25.8182
Hc	0	3.14904	0.228	0.004	0	Ependymal	Hc	57
5330413P13Rik	0	3.09124	0.179	0.005	0	Ependymal	5330413P13Rik	35.8
Dydc1	0	3.07129	0.207	0.007	0	Ependymal	Dydc1	29.5714
Crb2	0	3.02053	0.35	0.025	0	Ependymal	Crb2	14
Car9	0	2.92778	0.213	0.002	0	Ependymal	Car9	106.5
Tcte1	0	2.87462	0.279	0.006	0	Ependymal	Tcte1	46.5
Dnajb13	0	2.70215	0.188	0.001	0	Ependymal	Dnajb13	188
Pih1h3b	0	2.60222	0.215	0.002	0	Ependymal	Pih1h3b	107.5
Msx1	0	2.55226	0.19	0.004	0	Ependymal	Msx1	47.5
Layn1	0	2.52954	0.198	0.007	0	Ependymal	Layn	28.2857
Jhy	0	2.52896	0.232	0.006	0	Ependymal	Jhy	38.6667
Scnn1a	0	2.41059	0.196	0.004	0	Ependymal	Scnn1a	49
Stmnd1	0	2.31118	0.136	0.002	0	Ependymal	Stmnd1	68
Cfap73	0	2.20392	0.217	0.005	0	Ependymal	Cfap73	43.4
Gm29538	0	2.04637	0.22	0.001	0	Ependymal	Gm29538	220
Olah	0	2.04596	0.211	0.007	0	Ependymal	Olah	30.1429
Ccdc3	0	1.94846	0.226	0.007	0	Ependymal	Ccdc3	32.2857
1700020G17Rik	0	1.75413	0.203	0.002	0	Ependymal	1700020G17Rik	101.5
Dytn	0	1.70333	0.179	0.003	0	Ependymal	Dytn	59.6667
Gm11992	0	1.63891	0.154	0.004	0	Ependymal	Gm11992	38.5
Cpn1	0	1.56616	0.194	0.002	0	Ependymal	Cpn1	97
Tekt3	0	1.42278	0.134	0.001	0	Ependymal	Tekt3	134
Rd3	0	1.37504	0.136	0.001	0	Ependymal	Rd3	136
Gm35611	0	1.21329	0.16	0.002	0	Ependymal	Gm35611	80
Gm49896	0	1.20952	0.126	0.001	0	Ependymal	Gm49896	126
Dnaaf1	0	1.20866	0.188	0.003	0	Ependymal	Dnaaf1	62.6667
1810020O05Rik	0	1.09267	0.249	0.003	0	Ependymal	1810020O05Rik	83
Hkdc1	0	1.07119	0.171	0.003	0	Ependymal	Hkdc1	57
Gm48500	0	1.03619	0.19	0	0	Ependymal	Gm48500	Inf
Gm36033	0	0.936812	0.228	0.002	0	Ependymal	Gm36033	114
Prr29	0	0.847333	0.139	0.001	0	Ependymal	Prr29	139
6430531B16Rik	0	0.820107	0.181	0.006	0	Ependymal	6430531B16Rik	30.1667
Hp	0	0.529272	0.122	0.001	0	Ependymal	Hp	122
Gm40761	0	0.523841	0.102	0.001	0	Ependymal	Gm40761	102
Gm19301	0	0.520182	0.115	0	0	Ependymal	Gm19301	Inf
Saxo2	2.9984e-307	15.5625	0.418	0.042	1.00452e-302	Ependymal	Saxo2	9.95238
Cfap58	2.51426e-303	1.70784	0.145	0.003	8.42329e-299	Ependymal	Cfap58	48.3333
Fank1	4.18119e-303	7.38637	0.452	0.05	1.40078e-298	Ependymal	Fank1	9.04
Agbl2	2.17194e-302	3.38526	0.2	0.008	7.27642e-298	Ependymal	Agbl2	25
Col5a3	2.50967e-301	2.92492	0.324	0.024	8.40791e-297	Ependymal	Col5a3	13.5
Chia1	1.19915e-300	0.648504	0.149	0.004	4.01739e-296	Ependymal	Chia1	37.25
Myo7a	1.1019e-297	7.21102	0.343	0.028	3.69158e-293	Ependymal	Myo7a	12.25
Fhad1	2.40184e-297	32.4519	0.614	0.101	8.04666e-293	Ependymal	Fhad1	6.07921
Caps2	2.06288e-294	2.33321	0.151	0.004	6.91107e-290	Ependymal	Caps2	37.75
Bbox1	1.9993e-293	28.3925	0.478	0.059	6.69805e-289	Ependymal	Bbox1	8.10169
Ttc34	2.13246e-291	4.50155	0.26	0.016	7.14418e-287	Ependymal	Ttc34	16.25
Gcnt1	2.29555e-289	2.35688	0.245	0.014	7.69056e-285	Ependymal	Gcnt1	17.5
Cep128	1.91425e-285	29.2209	0.58	0.092	6.41313e-281	Ependymal	Cep128	6.30435
Npnt	1.88492e-283	3.28887	0.249	0.015	6.31485e-279	Ependymal	Npnt	16.6
Gm16006	7.335e-283	7.13526	0.164	0.005	2.45737e-278	Ependymal	Gm16006	32.8
Cckbr	4.60215e-282	2.13508	0.173	0.006	1.54181e-277	Ependymal	Cckbr	28.8333
Cfap46	2.94944e-280	51.7287	0.725	0.166	9.88123e-276	Ependymal	Cfap46	4.36747
Spef1	2.70742e-279	5.46287	0.252	0.015	9.0704e-275	Ependymal	Spef1	16.8
Dnah7c	5.95805e-278	25.3718	0.518	0.075	1.99607e-273	Ependymal	Dnah7c	6.90667
Tgfbr2	3.75928e-277	22.4193	0.454	0.055	1.25943e-272	Ependymal	Tgfbr2	8.25455
Pawr	5.37717e-276	4.02531	0.258	0.016	1.80146e-271	Ependymal	Pawr	16.125
B3gnt4	1.50644e-274	0.77316	0.168	0.006	5.04686e-270	Ependymal	B3gnt4	28
Ttll10	3.12778e-268	0.859162	0.143	0.004	1.04787e-263	Ependymal	Ttll10	35.75
2023-03-01	1.015e-266	0.555688	0.111	0.002	3.40046e-262	Ependymal	2023-03-01	55.5
Mamdc2	4.0192e-265	1.48931	0.22	0.012	1.34651e-260	Ependymal	Mamdc2	18.3333
Cfap54	5.9557e-265	120.214	0.802	0.225	1.99528e-260	Ependymal	Cfap54	3.56444
Nuf2	1.0417e-261	1.45256	0.139	0.004	3.48989e-257	Ependymal	Nuf2	34.75
Ahnak1	1.30268e-260	9.49994	0.279	0.021	4.36426e-256	Ependymal	Ahnak	13.2857
Tmem232	3.26983e-260	55.6769	0.546	0.087	1.09546e-255	Ependymal	Tmem232	6.27586
Ccdc78	5.04601e-259	7.06122	0.348	0.034	1.69051e-254	Ependymal	Ccdc78	10.2353
Gm5737	6.10654e-259	0.557245	0.102	0.002	2.04581e-254	Ependymal	Gm5737	51
1700007G11Rik	1.05104e-258	182.409	0.286	0.023	3.52119e-254	Ependymal	1700007G11Rik	12.4348
Oxgr1	3.00155e-258	0.528348	0.124	0.003	1.00558e-253	Ependymal	Oxgr1	41.3333
Fam92b	3.66821e-256	2.32129	0.209	0.011	1.22892e-251	Ependymal	Fam92b	19
Gm15587	9.27636e-256	0.622957	0.151	0.005	3.10777e-251	Ependymal	Gm15587	30.2
Crip11	2.74054e-254	4.1608	0.181	0.008	9.18137e-250	Ependymal	Crip1	22.625
P2rx6	7.69653e-253	1.18848	0.243	0.016	2.57849e-248	Ependymal	P2rx6	15.1875
Ankfn1	1.10578e-252	71.7431	0.706	0.15	3.70459e-248	Ependymal	Ankfn1	4.70667
Gm37381	6.10995e-252	8.44091	0.107	0.002	2.04695e-247	Ependymal	Gm37381	53.5
Wdr95	2.36035e-250	13.7577	0.384	0.044	7.90766e-246	Ependymal	Wdr95	8.72727
Gmnc	2.44655e-249	1.94452	0.111	0.002	8.19644e-245	Ependymal	Gmnc	55.5
1500015O10Rik	3.00536e-245	83.2045	0.249	0.018	1.00686e-240	Ependymal	1500015O10Rik	13.8333
Fam166b	6.26349e-243	12.7706	0.188	0.009	2.09839e-238	Ependymal	Fam166b	20.8889
Spa17	1.83648e-237	17.2321	0.309	0.029	6.15257e-233	Ependymal	Spa17	10.6552
Glipr1l1	1.12578e-236	1.13197	0.109	0.002	3.7716e-232	Ependymal	Glipr1l1	54.5
Stk33	3.20497e-235	32.038	0.535	0.093	1.07373e-230	Ependymal	Stk33	5.75269
Ttll9	5.16799e-235	1.16302	0.211	0.013	1.73138e-230	Ependymal	Ttll9	16.2308
Kif9	1.10834e-234	41.0982	0.569	0.108	3.71314e-230	Ependymal	Kif9	5.26852
Efcab10	9.72634e-234	19.938	0.241	0.017	3.25852e-229	Ependymal	Efcab10	14.1765
5830408C22Rik	1.74941e-229	1.36861	0.134	0.004	5.86087e-225	Ependymal	5830408C22Rik	33.5
Spaca9	1.77084e-228	4.56529	0.166	0.008	5.93268e-224	Ependymal	Spaca9	20.75
Arhgap6	5.31101e-228	28.4955	0.456	0.068	1.7793e-223	Ependymal	Arhgap6	6.70588
Pcp4l1	7.44866e-228	43.8311	0.452	0.067	2.49545e-223	Ependymal	Pcp4l1	6.74627
Mns1	2.2963e-223	33.1409	0.535	0.097	7.69307e-219	Ependymal	Mns1	5.51546
Hspa2	5.00839e-222	28.5359	0.32	0.034	1.67791e-217	Ependymal	Hspa2	9.41176
E130006D01Rik	4.12992e-221	0.66674	0.117	0.003	1.3836e-216	Ependymal	E130006D01Rik	39
Ccdc40	7.05538e-221	6.76464	0.399	0.053	2.36369e-216	Ependymal	Ccdc40	7.5283
Cfap99	1.7594e-218	4.95775	0.294	0.028	5.89435e-214	Ependymal	Cfap99	10.5
Lrrc18	2.86326e-214	3.63883	0.124	0.004	9.59251e-210	Ependymal	Lrrc18	31
9530026P05Rik	1.96454e-210	55.8406	0.708	0.186	6.58162e-206	Ependymal	9530026P05Rik	3.80645
Iqcg	2.32122e-208	23.0254	0.407	0.059	7.77654e-204	Ependymal	Iqcg	6.89831
Pifo	1.93921e-207	14.2312	0.316	0.035	6.49675e-203	Ependymal	Pifo	9.02857
Ttc12	1.83364e-206	16.8714	0.377	0.05	6.14306e-202	Ependymal	Ttc12	7.54
Iqck	1.09796e-205	29.2307	0.586	0.128	3.67839e-201	Ependymal	Iqck	4.57812
Fsip1	2.26655e-205	18.4323	0.29	0.03	7.59339e-201	Ependymal	Fsip1	9.66667
Ptpn20	1.70838e-201	3.30435	0.2	0.014	5.72341e-197	Ependymal	Ptpn20	14.2857
1700088E04Rik	5.3469e-201	12.48	0.484	0.087	1.79132e-196	Ependymal	1700088E04Rik	5.56322
Serpinb6b	5.25651e-200	4.23039	0.124	0.004	1.76103e-195	Ependymal	Serpinb6b	31
Dcdc2a	8.76749e-200	10.5279	0.394	0.056	2.93728e-195	Ependymal	Dcdc2a	7.03571
Acot6	2.27904e-199	7.34145	0.279	0.028	7.63523e-195	Ependymal	Acot6	9.96429
Cryzl2	9.09207e-194	5.01823	0.273	0.027	3.04603e-189	Ependymal	Cryzl2	10.1111
Rsph10b	1.59858e-193	27.4389	0.578	0.131	5.35555e-189	Ependymal	Rsph10b	4.41221
C130026L21Rik	2.25062e-192	2.83896	0.245	0.022	7.54004e-188	Ependymal	C130026L21Rik	11.1364
Armc2	1.398e-191	22.2205	0.565	0.127	4.68357e-187	Ependymal	Armc2	4.44882
Ccdc151	5.32511e-189	2.69798	0.307	0.036	1.78402e-184	Ependymal	Ccdc151	8.52778
Anxa2	7.73248e-189	24.1221	0.303	0.035	2.59054e-184	Ependymal	Anxa2	8.65714
Asb14	4.24743e-188	8.39656	0.245	0.023	1.42298e-183	Ependymal	Asb14	10.6522
Gm16499	9.97726e-186	7.5107	0.292	0.033	3.34258e-181	Ependymal	Gm16499	8.84848
Gm29571	5.44837e-185	1.55763	0.226	0.019	1.82531e-180	Ependymal	Gm29571	11.8947
Nme5	1.83435e-184	14.4389	0.461	0.085	6.14544e-180	Ependymal	Nme5	5.42353
Ccdc96	7.04733e-183	3.55887	0.181	0.012	2.361e-178	Ependymal	Ccdc96	15.0833
Smkr-ps	5.60114e-182	0.769802	0.104	0.003	1.87649e-177	Ependymal	Smkr-ps	34.6667
Gm973	3.26448e-181	92.8955	0.708	0.222	1.09367e-176	Ependymal	Gm973	3.18919
Csrp2	3.64572e-180	24.3588	0.281	0.032	1.22139e-175	Ependymal	Csrp2	8.78125
Gm29266	5.66322e-172	11.1216	0.42	0.074	1.89729e-167	Ependymal	Gm29266	5.67568
Fam167a	1.81849e-171	1.40481	0.186	0.014	6.09231e-167	Ependymal	Fam167a	13.2857
Mak	5.34433e-171	10.9073	0.412	0.07	1.79046e-166	Ependymal	Mak	5.88571
Ddit4l1	3.32759e-170	1.04423	0.13	0.006	1.11481e-165	Ependymal	Ddit4l	21.6667
Wdr27	6.41222e-170	9.8696	0.418	0.074	2.14822e-165	Ependymal	Wdr27	5.64865
Ubxn10	4.99693e-168	2.4893	0.222	0.021	1.67407e-163	Ependymal	Ubxn10	10.5714
Ttc16	8.2553e-168	4.72889	0.301	0.038	2.76569e-163	Ependymal	Ttc16	7.92105
4933407L21Rik	4.31968e-167	2.16365	0.192	0.015	1.44718e-162	Ependymal	4933407L21Rik	12.8
Tmem107	1.52573e-166	14.3881	0.286	0.035	5.11149e-162	Ependymal	Tmem107	8.17143
Spag6l	3.7314e-166	39.2729	0.584	0.154	1.25009e-161	Ependymal	Spag6l	3.79221
Bank1	6.5661e-166	7.1543	0.247	0.026	2.19977e-161	Ependymal	Bank1	9.5
4930405D11Rik	6.82845e-162	1.34413	0.149	0.009	2.28767e-157	Ependymal	4930405D11Rik	16.5556
Plekha2	2.5714e-160	18.4159	0.284	0.036	8.6147e-156	Ependymal	Plekha2	7.88889
Rnf138rt1	3.17707e-158	3.15852	0.13	0.007	1.06438e-153	Ependymal	Rnf138rt1	18.5714
Akap14	1.38947e-157	8.87618	0.258	0.03	4.65501e-153	Ependymal	Akap14	8.6
Ccdc13	1.8467e-157	7.12494	0.324	0.048	6.1868e-153	Ependymal	Ccdc13	6.75
Riiad1	2.44422e-156	26.5595	0.45	0.093	8.18863e-152	Ependymal	Riiad1	4.83871
Cfap69	2.3515e-155	41.1902	0.706	0.25	7.878e-151	Ependymal	Cfap69	2.824
Hist1h4h	3.15842e-155	5.54902	0.194	0.017	1.05814e-150	Ependymal	Hist1h4h	11.4118
Elmod1	1.64525e-154	18.3922	0.559	0.144	5.51193e-150	Ependymal	Elmod1	3.88194
Acot1	1.92293e-149	11.9529	0.215	0.022	6.44221e-145	Ependymal	Acot1	9.77273
Cxcr4	4.09119e-149	0.504608	0.117	0.006	1.37063e-144	Ependymal	Cxcr4	19.5
Mycbpap	1.91583e-147	8.54487	0.333	0.053	6.41841e-143	Ependymal	Mycbpap	6.28302
9230114K14Rik	4.28283e-147	3.33183	0.277	0.037	1.43483e-142	Ependymal	9230114K14Rik	7.48649
Lrrc51	1.51538e-145	19.7143	0.443	0.096	5.07684e-141	Ependymal	Lrrc51	4.61458
Synm	2.1498e-145	22.6859	0.328	0.053	7.20225e-141	Ependymal	Synm	6.18868
Plin5	4.42488e-145	0.881844	0.13	0.008	1.48242e-140	Ependymal	Plin5	16.25
Esrrg	6.35007e-145	7.97104	0.623	0.189	2.1274e-140	Ependymal	Esrrg	3.2963
Ttll3	3.583e-144	14.1028	0.599	0.186	1.20038e-139	Ependymal	Ttll3	3.22043
Srl	2.9394e-142	6.97289	0.222	0.024	9.84759e-138	Ependymal	Srl	9.25
1110017D15Rik	8.01167e-142	40.1486	0.354	0.063	2.68407e-137	Ependymal	1110017D15Rik	5.61905
Gcnt21	2.63147e-141	1.91015	0.267	0.035	8.81596e-137	Ependymal	Gcnt2	7.62857
1300017J02Rik	5.39944e-141	1.48677	0.262	0.034	1.80892e-136	Ependymal	1300017J02Rik	7.70588
4932443I19Rik	6.18028e-141	8.37899	0.192	0.019	2.07052e-136	Ependymal	4932443I19Rik	10.1053
Pbxip1	1.02333e-140	28.1154	0.516	0.135	3.42837e-136	Ependymal	Pbxip1	3.82222
Gprc5c	2.61485e-140	1.18208	0.139	0.009	8.76028e-136	Ependymal	Gprc5c	15.4444
Cphx3	7.11705e-140	7.227	0.164	0.013	2.38435e-135	Ependymal	Cphx3	12.6154
Cfap97d2	1.04893e-139	7.92408	0.294	0.044	3.51412e-135	Ependymal	Cfap97d2	6.68182
Pir	4.17013e-138	11.2624	0.318	0.052	1.39708e-133	Ependymal	Pir	6.11538
S100a11	4.09757e-136	11.7136	0.158	0.013	1.37277e-131	Ependymal	S100a11	12.1538
Pgpep1l	6.8015e-136	1.61427	0.183	0.017	2.27864e-131	Ependymal	Pgpep1l	10.7647
Tagln21	4.23028e-135	1.69607	0.134	0.009	1.41723e-130	Ependymal	Tagln2	14.8889
Cdk6	5.74836e-135	2.69334	0.369	0.069	1.92582e-130	Ependymal	Cdk6	5.34783
Casq2	5.93573e-135	1.85054	0.143	0.01	1.98859e-130	Ependymal	Casq2	14.3
Vit	7.18455e-135	9.50705	0.431	0.094	2.40697e-130	Ependymal	Vit	4.58511
Kif11	9.23388e-135	0.621023	0.134	0.009	3.09353e-130	Ependymal	Kif11	14.8889
Agbl3	2.44431e-134	20.256	0.49	0.128	8.18893e-130	Ependymal	Agbl3	3.82812
Ccdc189	1.0416e-133	2.85774	0.226	0.027	3.48958e-129	Ependymal	Ccdc189	8.37037
Afap1l21	2.66576e-133	4.70432	0.343	0.061	8.93083e-129	Ependymal	Afap1l2	5.62295
Dsg2	3.55377e-133	6.05563	0.262	0.036	1.19058e-128	Ependymal	Dsg2	7.27778
St3gal61	4.145e-133	10.848	0.525	0.144	1.38866e-128	Ependymal	St3gal6	3.64583
Hhatl	7.19616e-132	3.45499	0.2	0.021	2.41086e-127	Ependymal	Hhatl	9.52381
Pde6h	1.85898e-131	9.0631	0.267	0.038	6.22796e-127	Ependymal	Pde6h	7.02632
Ccdc187	3.94327e-131	4.477	0.345	0.062	1.32107e-126	Ependymal	Ccdc187	5.56452
Gm5617	5.00384e-131	5.82001	0.188	0.019	1.67639e-126	Ependymal	Gm5617	9.89474
Gm29508	4.4185e-130	0.859029	0.126	0.008	1.48029e-125	Ependymal	Gm29508	15.75
Ak8	3.95627e-129	4.54146	0.371	0.073	1.32543e-124	Ependymal	Ak8	5.08219
Nudt4	8.79619e-129	109.429	0.561	0.172	2.9469e-124	Ependymal	Nudt4	3.26163
Wdr78	2.57764e-127	47.0778	0.625	0.219	8.63562e-123	Ependymal	Wdr78	2.85388
Zmynd12	7.36495e-125	11.6456	0.367	0.073	2.46741e-120	Ependymal	Zmynd12	5.0274
Dnah1	1.51749e-124	8.96586	0.388	0.083	5.08391e-120	Ependymal	Dnah1	4.6747
1700001L19Rik	2.6295e-124	4.88206	0.16	0.014	8.80934e-120	Ependymal	1700001L19Rik	11.4286
Ascc1	1.81697e-122	36.7124	0.505	0.143	6.08722e-118	Ependymal	Ascc1	3.53147
Drc1	3.2173e-121	28.0331	0.482	0.129	1.07786e-116	Ependymal	Drc1	3.73643
Cd55	7.84599e-120	5.92845	0.256	0.038	2.62856e-115	Ependymal	Cd55	6.73684
Ribc2	1.13488e-119	1.08423	0.209	0.025	3.80207e-115	Ependymal	Ribc2	8.36
Gm17225	1.94131e-117	0.948483	0.156	0.014	6.50378e-113	Ependymal	Gm17225	11.1429
Lrrc56	5.4297e-117	0.647241	0.156	0.014	1.81906e-112	Ependymal	Lrrc56	11.1429
Fam84b	9.26736e-114	5.6322	0.13	0.01	3.10475e-109	Ependymal	Fam84b	13
Slc2a11	1.24491e-113	5.55928	0.441	0.115	4.1707e-109	Ependymal	Slc2a1	3.83478
Tppp3	1.50299e-113	27.0658	0.362	0.079	5.03531e-109	Ependymal	Tppp3	4.58228
Elof1	5.55275e-113	54.2728	0.397	0.095	1.86028e-108	Ependymal	Elof1	4.17895
Npy2r	6.91798e-113	1.30184	0.215	0.029	2.31766e-108	Ependymal	Npy2r	7.41379
Mro	1.25381e-112	10.7316	0.478	0.133	4.20052e-108	Ependymal	Mro	3.59398
Cdc14a	1.27041e-111	21.3695	0.452	0.122	4.25613e-107	Ependymal	Cdc14a	3.70492
1700003E16Rik	1.04837e-110	3.55827	0.228	0.033	3.51223e-106	Ependymal	1700003E16Rik	6.90909
Ddo	3.7897e-110	31.0034	0.623	0.229	1.26963e-105	Ependymal	Ddo	2.72052
Plch1	6.26517e-110	15.2436	0.484	0.138	2.09896e-105	Ependymal	Plch1	3.50725
Dbi	1.28474e-109	476.572	0.746	0.381	4.30415e-105	Ependymal	Dbi	1.95801
1700030J22Rik	1.04874e-108	0.993567	0.183	0.022	3.51349e-104	Ependymal	1700030J22Rik	8.31818
Ccdc39	4.01937e-108	26.1823	0.588	0.218	1.34657e-103	Ependymal	Ccdc39	2.69725
Crocc	6.98873e-107	15.0993	0.478	0.142	2.34136e-102	Ependymal	Crocc	3.3662
Ccdc173	7.75517e-107	10.4555	0.458	0.131	2.59814e-102	Ependymal	Ccdc173	3.49618
Wwtr1	1.22128e-105	23.5505	0.407	0.1	4.09153e-101	Ependymal	Wwtr1	4.07
Baiap2	3.29837e-105	4.68275	0.328	0.068	1.10502e-100	Ependymal	Baiap2	4.82353
Ppil6	4.30704e-105	19.51	0.595	0.233	1.44295e-100	Ependymal	Ppil6	2.55365
Antxr2	1.29474e-104	4.26009	0.179	0.021	4.33762e-100	Ependymal	Antxr2	8.52381
Chaf1a	2.78114e-103	2.72988	0.198	0.026	9.31736e-99	Ependymal	Chaf1a	7.61538
Txnip	1.73018e-102	11.832	0.245	0.04	5.79644e-98	Ependymal	Txnip	6.125
Ccpg1os	1.08081e-101	4.88421	0.228	0.035	3.62094e-97	Ependymal	Ccpg1os	6.51429
2310014F06Rik	2.72591e-101	2.51981	0.136	0.013	9.13235e-97	Ependymal	2310014F06Rik	10.4615
Ttll13	4.22065e-101	0.537342	0.122	0.01	1.414e-96	Ependymal	Ttll13	12.2
Iqgap2	6.15532e-101	20.4318	0.42	0.112	2.06215e-96	Ependymal	Iqgap2	3.75
S100b	2.20009e-100	14.6639	0.512	0.165	7.37075e-96	Ependymal	S100b	3.10303
Ttc6	4.92071e-100	0.799715	0.119	0.01	1.64853e-95	Ependymal	Ttc6	11.9
Deup1	5.05041e-100	0.758445	0.132	0.012	1.69199e-95	Ependymal	Deup1	11
Acss3	3.92921e-98	9.30114	0.375	0.091	1.31636e-93	Ependymal	Acss3	4.12088
Stk36	7.57753e-98	1.9862	0.29	0.057	2.53862e-93	Ependymal	Stk36	5.08772
4930550C14Rik	2.03763e-97	0.84155	0.128	0.012	6.82647e-93	Ependymal	4930550C14Rik	10.6667
Pdlim4	4.21336e-97	8.90637	0.273	0.052	1.41156e-92	Ependymal	Pdlim4	5.25
Clic1	8.01566e-97	5.24315	0.222	0.035	2.68541e-92	Ependymal	Clic1	6.34286
Flacc1	3.27108e-96	0.84561	0.136	0.014	1.09588e-91	Ependymal	Flacc1	9.71429
Slc25a21	4.27202e-96	9.13634	0.288	0.057	1.43121e-91	Ependymal	Slc25a21	5.05263
Zfp36l1	3.83764e-95	30.951	0.443	0.131	1.28569e-90	Ependymal	Zfp36l1	3.38168
Crip2	1.5335e-94	21.4113	0.286	0.058	5.13752e-90	Ependymal	Crip2	4.93103
Scn7a	2.58969e-94	0.722149	0.147	0.016	8.67599e-90	Ependymal	Scn7a	9.1875
Xylb	4.22357e-94	1.61697	0.168	0.021	1.41498e-89	Ependymal	Xylb	8
Dnaja4	2.74415e-93	16.7035	0.311	0.068	9.19344e-89	Ependymal	Dnaja4	4.57353
Vegfd	1.35369e-92	0.942179	0.156	0.018	4.53515e-88	Ependymal	Vegfd	8.66667
Ttc30b	5.66735e-92	0.951774	0.107	0.009	1.89868e-87	Ependymal	Ttc30b	11.8889
A430108G06Rik	1.70314e-91	0.522101	0.104	0.008	5.70585e-87	Ependymal	A430108G06Rik	13
Dusp18	4.01198e-91	3.84471	0.188	0.027	1.34409e-86	Ependymal	Dusp18	6.96296
Ankrd9	4.89766e-91	3.21096	0.239	0.042	1.64081e-86	Ependymal	Ankrd9	5.69048
Ifi27	1.54327e-90	6.3809	0.258	0.049	5.17027e-86	Ependymal	Ifi27	5.26531
Col27a1	6.41403e-90	1.84476	0.294	0.062	2.14883e-85	Ependymal	Col27a1	4.74194
Gramd1c	1.26805e-89	6.89126	0.397	0.109	4.24822e-85	Ependymal	Gramd1c	3.6422
Bdh2	2.60506e-89	0.726684	0.139	0.015	8.72747e-85	Ependymal	Bdh2	9.26667
Dkk3	7.77552e-89	2.13363	0.243	0.044	2.60495e-84	Ependymal	Dkk3	5.52273
Ptpn141	1.64031e-88	0.868752	0.156	0.019	5.49538e-84	Ependymal	Ptpn14	8.21053
Rbp1	5.55805e-88	12.6926	0.154	0.019	1.86206e-83	Ependymal	Rbp1	8.10526
Ocln1	1.16985e-87	2.83377	0.262	0.052	3.91922e-83	Ependymal	Ocln	5.03846
Ccdc65	9.94187e-87	4.62164	0.26	0.051	3.33073e-82	Ependymal	Ccdc65	5.09804
Dnaaf4	1.2325e-86	1.38826	0.156	0.019	4.12911e-82	Ependymal	Dnaaf4	8.21053
Lrriq3	8.334e-86	1.65849	0.198	0.031	2.79206e-81	Ependymal	Lrriq3	6.3871
Rsph9	9.70779e-86	17.8383	0.362	0.097	3.25231e-81	Ependymal	Rsph9	3.73196
Ulk4	2.15627e-85	31.1228	0.635	0.297	7.22393e-81	Ependymal	Ulk4	2.13805
Sox9	1.01338e-84	30.7212	0.35	0.092	3.39501e-80	Ependymal	Sox9	3.80435
Aif1l	1.15858e-84	1.19057	0.145	0.017	3.88146e-80	Ependymal	Aif1l	8.52941
Adgre51	2.51457e-84	2.26093	0.177	0.026	8.4243e-80	Ependymal	Adgre5	6.80769
Med9os	1.99404e-83	1.30307	0.124	0.013	6.68042e-79	Ependymal	Med9os	9.53846
Spata24	2.37189e-83	11.1142	0.335	0.085	7.9463e-79	Ependymal	Spata24	3.94118
Cdkn1a	2.64273e-83	3.58676	0.122	0.012	8.85367e-79	Ependymal	Cdkn1a	10.1667
Akip1	3.99785e-83	0.792388	0.111	0.01	1.33936e-78	Ependymal	Akip1	11.1
Gm36037	7.65795e-83	17.7612	0.288	0.065	2.56557e-78	Ependymal	Gm36037	4.43077
Sap30bpos	7.67524e-83	0.934227	0.16	0.021	2.57136e-78	Ependymal	Sap30bpos	7.61905
Arhgef33	1.8251e-82	3.42639	0.337	0.086	6.11444e-78	Ependymal	Arhgef33	3.9186
Fam161a	2.24748e-82	2.44475	0.256	0.052	7.52951e-78	Ependymal	Fam161a	4.92308
Sco2	1.0815e-81	1.82507	0.256	0.052	3.62323e-77	Ependymal	Sco2	4.92308
Agmo	2.47024e-81	8.30238	0.418	0.127	8.27578e-77	Ependymal	Agmo	3.29134
Rnase4	6.00163e-81	6.03823	0.205	0.035	2.01067e-76	Ependymal	Rnase4	5.85714
Tsga10	6.26813e-81	43.6516	0.616	0.292	2.09995e-76	Ependymal	Tsga10	2.10959
Lrrc8c1	1.63715e-80	2.70188	0.262	0.055	5.48478e-76	Ependymal	Lrrc8c	4.76364
Klkb1	4.65481e-80	0.585683	0.111	0.011	1.55945e-75	Ependymal	Klkb1	10.0909
Gm35438.1	7.40648e-80	5.20434	0.267	0.058	2.48132e-75	Ependymal	Gm35438.1	4.60345
Luzp2	2.68864e-79	5.41665	0.328	0.725	9.00748e-75	Ependymal	Luzp2	0.452414
Hspb11	8.94201e-79	9.83633	0.147	0.019	2.99575e-74	Ependymal	Hspb1	7.73684
Gm3294	3.78367e-78	5.46451	0.192	0.032	1.26761e-73	Ependymal	Gm3294	6
Hipk1	2.07961e-77	61.7516	0.599	0.278	6.9671e-73	Ependymal	Hipk1	2.15468
Syne1	6.40422e-77	217.489	0.915	0.813	2.14554e-72	Ependymal	Syne1	1.12546
Tctex1d1	9.27088e-77	1.70974	0.207	0.037	3.10593e-72	Ependymal	Tctex1d1	5.59459
Cetn2	1.80588e-76	24.5284	0.288	0.07	6.05005e-72	Ependymal	Cetn2	4.11429
Dnah7b	2.97162e-76	24.3289	0.625	0.305	9.95551e-72	Ependymal	Dnah7b	2.04918
Clu	5.83436e-76	115.061	0.759	0.437	1.95463e-71	Ependymal	Clu	1.73684
Naaa	7.13895e-76	19.7523	0.299	0.074	2.39169e-71	Ependymal	Naaa	4.04054
Klhdc7a	8.37133e-76	1.31008	0.139	0.018	2.80456e-71	Ependymal	Klhdc7a	7.72222
5430403G16Rik	1.83462e-75	0.947213	0.213	0.04	6.14633e-71	Ependymal	5430403G16Rik	5.325
Ccdc30	4.20048e-75	51.5364	0.691	0.373	1.40724e-70	Ependymal	Ccdc30	1.85255
Cnn3	1.76039e-74	35.3561	0.394	0.126	5.89764e-70	Ependymal	Cnn3	3.12698
Pxdc1	8.10527e-74	0.597391	0.117	0.013	2.71543e-69	Ependymal	Pxdc1	9
Creb3l1	1.55147e-73	0.806975	0.117	0.013	5.19774e-69	Ependymal	Creb3l1	9
Ccdc74a	2.65482e-73	3.44077	0.188	0.032	8.89416e-69	Ependymal	Ccdc74a	5.875
Gpc4	3.3326e-73	0.532206	0.113	0.012	1.11649e-68	Ependymal	Gpc4	9.41667
Serpinb1b	5.37839e-73	1.22685	0.124	0.015	1.80187e-68	Ependymal	Serpinb1b	8.26667
Anxa5	5.95683e-73	40.6904	0.36	0.11	1.99566e-68	Ependymal	Anxa5	3.27273
Ccdc122	9.32509e-73	1.04395	0.181	0.03	3.12409e-68	Ependymal	Ccdc122	6.03333
Gm16083	1.46538e-72	15.7076	0.576	0.246	4.90932e-68	Ependymal	Gm16083	2.34146
Ift81	2.56083e-72	15.1118	0.557	0.243	8.57929e-68	Ependymal	Ift81	2.29218
Ccdc171	1.26252e-71	15.1434	0.431	0.15	4.2297e-67	Ependymal	Ccdc171	2.87333
Cpne8	2.21041e-71	1.18966	0.271	0.063	7.40531e-67	Ependymal	Cpne8	4.30159
BC049715	2.6044e-71	0.850398	0.134	0.017	8.72525e-67	Ependymal	BC049715	7.88235
Ctsh1	2.96665e-71	3.89163	0.211	0.04	9.93888e-67	Ependymal	Ctsh	5.275
Il12rb2	6.67488e-71	2.99311	0.194	0.035	2.23622e-66	Ependymal	Il12rb2	5.54286
Serpinh11	1.14908e-70	3.91586	0.23	0.048	3.84966e-66	Ependymal	Serpinh1	4.79167
Lekr1	1.58357e-70	18.2935	0.542	0.226	5.30528e-66	Ependymal	Lekr1	2.39823
Ccdc88c	2.73458e-70	15.5955	0.501	0.203	9.16138e-66	Ependymal	Ccdc88c	2.46798
1110004E09Rik	9.05769e-70	14.1868	0.149	0.022	3.03451e-65	Ependymal	1110004E09Rik	6.77273
Sox6	1.01212e-69	18.401	0.729	0.35	3.39079e-65	Ependymal	Sox6	2.08286
Grk4	1.63943e-69	13.7913	0.429	0.152	5.4924e-65	Ependymal	Grk4	2.82237
Katnal2	2.27975e-69	10.0449	0.452	0.163	7.63763e-65	Ependymal	Katnal2	2.77301
Fam107b	2.59481e-69	2.65339	0.207	0.04	8.69313e-65	Ependymal	Fam107b	5.175
BC006965	7.152e-69	2.23534	0.175	0.03	2.39606e-64	Ependymal	BC006965	5.83333
Ccdc191	1.02017e-68	25.9538	0.531	0.229	3.41777e-64	Ependymal	Ccdc191	2.31878
Rassf4	1.22192e-68	0.744664	0.115	0.013	4.09369e-64	Ependymal	Rassf4	8.84615
Gm16365	3.45978e-68	11.7135	0.134	0.018	1.1591e-63	Ependymal	Gm16365	7.44444
Gm16702	7.79985e-68	1.30621	0.13	0.017	2.61311e-63	Ependymal	Gm16702	7.64706
Mob3b	2.21349e-67	9.32468	0.456	0.167	7.41564e-63	Ependymal	Mob3b	2.73054
Akna	3.60445e-67	0.967633	0.136	0.019	1.20756e-62	Ependymal	Akna	7.15789
Atp2b4	4.88013e-67	6.81262	0.32	0.09	1.63494e-62	Ependymal	Atp2b4	3.55556
Wdr90	6.25674e-67	2.891	0.264	0.064	2.09613e-62	Ependymal	Wdr90	4.125
Slc38a1	7.81266e-66	84.7451	0.731	0.468	2.6174e-61	Ependymal	Slc38a1	1.56197
1700029J07Rik	1.06823e-65	8.14972	0.354	0.112	3.5788e-61	Ependymal	1700029J07Rik	3.16071
Maml2	1.26966e-65	71.7791	0.723	0.425	4.2536e-61	Ependymal	Maml2	1.70118
Rgs121	3.0696e-65	5.16031	0.324	0.094	1.02838e-60	Ependymal	Rgs12	3.44681
Frem21	4.53743e-65	2.12774	0.247	0.058	1.52013e-60	Ependymal	Frem2	4.25862
Anxa11	5.65002e-65	1.57923	0.252	0.06	1.89287e-60	Ependymal	Anxa11	4.2
Gm8186	8.77383e-65	8.59447	0.136	0.02	2.93941e-60	Ependymal	Gm8186	6.8
Amotl2	1.19787e-64	3.12344	0.207	0.043	4.01311e-60	Ependymal	Amotl2	4.81395
Efcab12	2.03112e-64	2.34327	0.26	0.064	6.80467e-60	Ependymal	Efcab12	4.0625
Ccdc138	3.0545e-64	14.6635	0.422	0.154	1.02332e-59	Ependymal	Ccdc138	2.74026
Psmc3ip	9.00076e-64	5.66285	0.109	0.013	3.01544e-59	Ependymal	Psmc3ip	8.38462
Plat1	1.12653e-63	2.37549	0.258	0.064	3.77411e-59	Ependymal	Plat	4.03125
Yap1	1.87121e-63	3.29441	0.286	0.076	6.26894e-59	Ependymal	Yap1	3.76316
Fam227a	2.17577e-63	9.06104	0.465	0.187	7.28926e-59	Ependymal	Fam227a	2.48663
Nnat	8.03064e-63	111.705	0.748	0.477	2.69043e-58	Ependymal	Nnat	1.56813
Tex26	1.30793e-62	0.512762	0.109	0.013	4.38184e-58	Ependymal	Tex26	8.38462
Gm4876	1.3912e-62	45.9896	0.659	0.364	4.6608e-58	Ependymal	Gm4876	1.81044
Slc14a2	2.1723e-62	14.1519	0.226	0.051	7.27763e-58	Ependymal	Slc14a2	4.43137
Fam126a	8.08971e-62	13.0136	0.461	0.184	2.71021e-57	Ependymal	Fam126a	2.50543
Cep126	8.1474e-62	30.4839	0.582	0.282	2.72954e-57	Ependymal	Cep126	2.06383
Gsta41	9.18468e-62	5.17845	0.19	0.038	3.07705e-57	Ependymal	Gsta4	5
Emp22	9.5576e-62	1.91724	0.215	0.047	3.20199e-57	Ependymal	Emp2	4.57447
9130017K11Rik	2.46894e-61	0.524836	0.132	0.019	8.27145e-57	Ependymal	9130017K11Rik	6.94737
Wnt4	2.95977e-61	20.7719	0.33	0.1	9.91582e-57	Ependymal	Wnt4	3.3
Gng5	3.14003e-61	35.2757	0.286	0.081	1.05197e-56	Ependymal	Gng5	3.53086
Trp63	6.33967e-61	1.56658	0.154	0.026	2.12392e-56	Ependymal	Trp63	5.92308
Syne2	1.31631e-60	10.1529	0.29	0.081	4.40991e-56	Ependymal	Syne2	3.58025
Sorbs3	1.3705e-60	1.61736	0.209	0.046	4.59146e-56	Ependymal	Sorbs3	4.54348
Bola1	2.20101e-60	8.13242	0.205	0.045	7.37382e-56	Ependymal	Bola1	4.55556
Efcab1	3.40944e-60	22.2305	0.544	0.239	1.14223e-55	Ependymal	Efcab1	2.27615
G630093K05Rik	1.18066e-59	0.509747	0.124	0.018	3.95546e-55	Ependymal	G630093K05Rik	6.88889
Tubb4b	1.25384e-59	99.2023	0.542	0.263	4.2006e-55	Ependymal	Tubb4b	2.06084
Dnal1	4.11581e-59	14.2957	0.542	0.267	1.37888e-54	Ependymal	Dnal1	2.02996
Fbxo36	6.95535e-59	9.29428	0.465	0.192	2.33018e-54	Ependymal	Fbxo36	2.42188
Wdr31	1.22987e-58	4.52777	0.258	0.067	4.12032e-54	Ependymal	Wdr31	3.85075
Rpgrip1l	5.3659e-58	17.2585	0.486	0.212	1.79768e-53	Ependymal	Rpgrip1l	2.29245
Rnf144b1	8.53173e-58	0.69398	0.207	0.046	2.8583e-53	Ependymal	Rnf144b	4.5
Spata6	9.94396e-58	10.3068	0.401	0.149	3.33143e-53	Ependymal	Spata6	2.69128
Ccdc1902	2.10755e-57	2.93459	0.339	0.108	7.06072e-53	Ependymal	Ccdc190	3.13889
Hist1h2bc	5.32465e-57	27.6918	0.275	0.079	1.78386e-52	Ependymal	Hist1h2bc	3.48101
Cfap74	1.93801e-56	12.3475	0.595	0.307	6.49273e-52	Ependymal	Cfap74	1.93811
2023-03-10	3.12625e-56	4.54493	0.237	0.06	1.04735e-51	Ependymal	2023-03-10	3.95
B9d1	3.83694e-56	3.89619	0.281	0.082	1.28545e-51	Ependymal	B9d1	3.42683
Taco1os	4.49211e-56	1.43417	0.132	0.021	1.50495e-51	Ependymal	Taco1os	6.28571
Gm49494	9.86345e-56	0.978802	0.104	0.014	3.30445e-51	Ependymal	Gm49494	7.42857
Mok	1.94133e-55	11.3325	0.422	0.169	6.50384e-51	Ependymal	Mok	2.49704
Cetn4	3.3931e-55	10.3888	0.224	0.056	1.13676e-50	Ependymal	Cetn4	4
Zc2hc1c	4.76311e-55	1.56031	0.122	0.018	1.59574e-50	Ependymal	Zc2hc1c	6.77778
Nfix	6.7046e-55	36.5683	0.467	0.203	2.24618e-50	Ependymal	Nfix	2.30049
Trp53bp2	8.9606e-55	1.55949	0.373	0.136	3.00198e-50	Ependymal	Trp53bp2	2.74265
Lca5l	9.11979e-55	3.06391	0.422	0.172	3.05531e-50	Ependymal	Lca5l	2.45349
BC051142	1.34307e-54	3.0246	0.226	0.056	4.49954e-50	Ependymal	BC051142	4.03571
Otx2	4.1027e-54	3.13314	0.256	0.07	1.37449e-49	Ependymal	Otx2	3.65714
Wdpcp	5.27008e-54	8.09852	0.576	0.305	1.76558e-49	Ependymal	Wdpcp	1.88852
Bphl	5.64082e-54	25.5179	0.437	0.182	1.88979e-49	Ependymal	Bphl	2.4011
Hmgn5	8.16767e-54	1.63238	0.113	0.016	2.73633e-49	Ependymal	Hmgn5	7.0625
Gm7173	2.22183e-53	29.807	0.2	0.048	7.44357e-49	Ependymal	Gm7173	4.16667
Ccdc57	2.33923e-53	8.76427	0.499	0.228	7.83688e-49	Ependymal	Ccdc57	2.1886
Mt3	4.00053e-53	128.046	0.638	0.381	1.34026e-48	Ependymal	Mt3	1.67454
Nxn	8.96667e-53	8.38072	0.437	0.178	3.00401e-48	Ependymal	Nxn	2.45506
Cep83	9.44099e-53	25.0275	0.529	0.262	3.16292e-48	Ependymal	Cep83	2.01908
Gm15689	1.91179e-52	1.46731	0.203	0.047	6.40488e-48	Ependymal	Gm15689	4.31915
Trim561	2.5814e-52	0.895031	0.119	0.018	8.64819e-48	Ependymal	Trim56	6.61111
2610307P16Rik	6.524e-52	16.9542	0.371	0.14	2.18567e-47	Ependymal	2610307P16Rik	2.65
Ankef1	1.01238e-51	4.01834	0.213	0.053	3.39167e-47	Ependymal	Ankef1	4.01887
Hsp90aa1	3.10599e-51	96.3065	0.821	0.629	1.04057e-46	Ependymal	Hsp90aa1	1.30525
Irx5	3.25608e-51	2.73735	0.22	0.056	1.09085e-46	Ependymal	Irx5	3.92857
Nek10	7.42167e-51	5.10625	0.527	0.247	2.48641e-46	Ependymal	Nek10	2.1336
Ubxn11	7.77539e-50	13.449	0.409	0.167	2.60491e-45	Ependymal	Ubxn11	2.4491
Wdr60	1.72173e-49	19.4192	0.537	0.273	5.76814e-45	Ependymal	Wdr60	1.96703
Syt10	2.2331e-49	16.2399	0.548	0.27	7.48133e-45	Ependymal	Syt10	2.02963
Gm34081	3.94344e-49	0.705014	0.154	0.03	1.32113e-44	Ependymal	Gm34081	5.13333
Nudc	4.51702e-49	36.9851	0.443	0.198	1.51329e-44	Ependymal	Nudc	2.23737
Gm16364.1	5.65819e-49	1.46759	0.203	0.05	1.89561e-44	Ependymal	Gm16364.1	4.06
Gm14964	5.75569e-49	11.1808	0.352	0.128	1.92827e-44	Ependymal	Gm14964	2.75
Spsb4	6.65432e-49	0.518968	0.145	0.028	2.22933e-44	Ependymal	Spsb4	5.17857
Ddr1	8.37832e-49	36.5419	0.586	0.323	2.80691e-44	Ependymal	Ddr1	1.81424
Iqch	2.12338e-48	6.1511	0.365	0.137	7.11375e-44	Ependymal	Iqch	2.66423
1700094D03Rik	3.51005e-48	16.0113	0.166	0.036	1.17594e-43	Ependymal	1700094D03Rik	4.61111
Hist1h4i	6.99861e-48	1.14505	0.113	0.018	2.34467e-43	Ependymal	Hist1h4i	6.27778
Tmem53	1.49953e-47	0.682659	0.211	0.054	5.02372e-43	Ependymal	Tmem53	3.90741
Ift88	3.76058e-47	16.8821	0.546	0.297	1.25987e-42	Ependymal	Ift88	1.83838
Pla2g16	4.121e-47	7.79792	0.168	0.038	1.38062e-42	Ependymal	Pla2g16	4.42105
Lsm14b	4.58418e-47	14.0047	0.243	0.071	1.53579e-42	Ependymal	Lsm14b	3.42254
Lrrc10b	5.79586e-47	4.46934	0.151	0.031	1.94173e-42	Ependymal	Lrrc10b	4.87097
Mlc1	5.9179e-47	24.349	0.375	0.147	1.98261e-42	Ependymal	Mlc1	2.55102
Mt2	6.7293e-47	59.1712	0.409	0.176	2.25445e-42	Ependymal	Mt2	2.32386
Ptma	9.89699e-47	18.496	0.625	0.373	3.31569e-42	Ependymal	Ptma	1.6756
Pard3b	1.01906e-46	15.2201	0.631	0.343	3.41405e-42	Ependymal	Pard3b	1.83965
Mgst1	1.31014e-46	11.1088	0.239	0.069	4.38923e-42	Ependymal	Mgst1	3.46377
Lgals3	1.42302e-46	3.08912	0.175	0.04	4.7674e-42	Ependymal	Lgals3	4.375
Pxn	4.82583e-46	3.13601	0.275	0.088	1.61675e-41	Ependymal	Pxn	3.125
Pacrg	5.82666e-46	21.835	0.67	0.464	1.95205e-41	Ependymal	Pacrg	1.44397
Cntrl	6.3089e-46	22.3389	0.48	0.237	2.11361e-41	Ependymal	Cntrl	2.02532
Tacc2	8.1621e-46	11.0417	0.514	0.252	2.73447e-41	Ependymal	Tacc2	2.03968
Oard1	1.01802e-45	3.1309	0.196	0.05	3.41057e-41	Ependymal	Oard1	3.92
Mxra8	1.76719e-45	2.19999	0.134	0.026	5.92046e-41	Ependymal	Mxra8	5.15385
Hsph1	4.35795e-45	20.7167	0.58	0.328	1.46e-40	Ependymal	Hsph1	1.76829
Plxnb2	4.75315e-45	15.3657	0.333	0.126	1.5924e-40	Ependymal	Plxnb2	2.64286
Ropn1l	5.13973e-45	0.606311	0.109	0.018	1.72191e-40	Ependymal	Ropn1l	6.05556
Cfap47	7.91265e-45	9.88222	0.362	0.148	2.6509e-40	Ependymal	Cfap47	2.44595
Coq8b	8.19196e-45	3.19695	0.348	0.134	2.74447e-40	Ependymal	Coq8b	2.59701
Antxr1	8.98106e-45	4.77399	0.435	0.196	3.00883e-40	Ependymal	Antxr1	2.21939
Ston2	1.04983e-44	19.1764	0.49	0.229	3.51712e-40	Ependymal	Ston2	2.13974
Metrn	1.26637e-44	4.03339	0.23	0.067	4.2426e-40	Ependymal	Metrn	3.43284
Ruvbl2	2.23295e-44	8.02343	0.196	0.052	7.48083e-40	Ependymal	Ruvbl2	3.76923
1810058I24Rik	4.37919e-44	15.4483	0.215	0.061	1.46712e-39	Ependymal	1810058I24Rik	3.52459
4933406C10Rik	6.77224e-44	1.25255	0.281	0.093	2.26884e-39	Ependymal	4933406C10Rik	3.02151
Rabl2	1.03158e-43	4.17009	0.375	0.153	3.45601e-39	Ependymal	Rabl2	2.45098
Chek2	1.05773e-43	6.94519	0.16	0.036	3.5436e-39	Ependymal	Chek2	4.44444
Wrn	1.42161e-43	23.9365	0.516	0.271	4.76266e-39	Ependymal	Wrn	1.90406
Rtn4rl1	1.94923e-43	0.733335	0.132	0.446	6.53031e-39	Ependymal	Rtn4rl1	0.295964
Mt1	4.47064e-43	218.936	0.633	0.409	1.49775e-38	Ependymal	Mt1	1.54768
2010300C02Rik	6.14385e-43	6.34921	0.367	0.147	2.05831e-38	Ependymal	2010300C02Rik	2.4966
Il6ra	1.84574e-42	1.64286	0.32	0.115	6.18361e-38	Ependymal	Il6ra	2.78261
Erich3	1.90235e-42	23.7706	0.448	0.212	6.37324e-38	Ependymal	Erich3	2.11321
Mr1	2.16998e-42	0.515138	0.126	0.024	7.26988e-38	Ependymal	Mr1	5.25
Wdr35	9.85469e-42	18.9309	0.452	0.218	3.30152e-37	Ependymal	Wdr35	2.07339
Ankrd44	2.14438e-41	15.017	0.631	0.391	7.18412e-37	Ependymal	Ankrd44	1.61381
Gm13830	2.73242e-41	2.77754	0.286	0.101	9.15414e-37	Ependymal	Gm13830	2.83168
Ift74	2.85996e-41	17.3837	0.505	0.262	9.58142e-37	Ependymal	Ift74	1.92748
Cpeb2	2.16995e-40	0.947087	0.164	0.473	7.26976e-36	Ependymal	Cpeb2	0.346723
Vstm4	2.3931e-40	0.68868	0.179	0.046	8.01737e-36	Ependymal	Vstm4	3.8913
Slc9a3r11	3.53096e-40	3.05341	0.194	0.054	1.18294e-35	Ependymal	Slc9a3r1	3.59259
Rwdd3	5.75662e-40	1.40255	0.222	0.066	1.92858e-35	Ependymal	Rwdd3	3.36364
Ndufaf8	5.78975e-40	3.50664	0.186	0.05	1.93968e-35	Ependymal	Ndufaf8	3.72
Gm33037	7.3249e-40	1.07818	0.134	0.028	2.45399e-35	Ependymal	Gm33037	4.78571
Slc25a182	8.95542e-40	3.8077	0.426	0.194	3.00025e-35	Ependymal	Slc25a18	2.19588
Gstm1	4.798e-39	30.9621	0.26	0.092	1.60743e-34	Ependymal	Gstm1	2.82609
Slc7a7	3.31325e-38	1.78103	0.141	0.031	1.11e-33	Ependymal	Slc7a7	4.54839
Oscp1	3.39102e-38	14.9109	0.394	0.18	1.13606e-33	Ependymal	Oscp1	2.18889
Dyrk3	3.94325e-38	0.694303	0.179	0.048	1.32107e-33	Ependymal	Dyrk3	3.72917
Pttg1	1.27364e-37	12.5069	0.252	0.087	4.26693e-33	Ependymal	Pttg1	2.89655
Ramp1	2.3391e-37	21.2692	0.399	0.185	7.83644e-33	Ependymal	Ramp1	2.15676
Ttc9	2.8279e-37	12.3984	0.286	0.107	9.47403e-33	Ependymal	Ttc9	2.6729
Abhd14a	4.24822e-37	12.0995	0.245	0.084	1.42324e-32	Ependymal	Abhd14a	2.91667
2610301B20Rik	1.07542e-36	6.44586	0.369	0.164	3.60287e-32	Ependymal	2610301B20Rik	2.25
Odc1	1.2332e-36	21.5555	0.303	0.122	4.13146e-32	Ependymal	Odc1	2.48361
Chchd10	1.46673e-36	74.8826	0.499	0.286	4.91384e-32	Ependymal	Chchd10	1.74476
Myo1e	1.63062e-36	9.73556	0.463	0.231	5.4629e-32	Ependymal	Myo1e	2.00433
Ctxn1	2.47186e-36	8.99783	0.183	0.053	8.28121e-32	Ependymal	Ctxn1	3.45283
Rhpn2	8.66806e-36	0.722034	0.149	0.037	2.90397e-31	Ependymal	Rhpn2	4.02703
Shank2	1.10531e-35	7.63633	0.714	0.464	3.703e-31	Ependymal	Shank2	1.53879
Selenbp1	1.12677e-35	0.777502	0.119	0.025	3.77489e-31	Ependymal	Selenbp1	4.76
Odf2l	1.20237e-35	7.08606	0.401	0.188	4.02817e-31	Ependymal	Odf2l	2.13298
Arl4a1	1.81016e-35	7.34232	0.328	0.138	6.06439e-31	Ependymal	Arl4a	2.37681
Gm29683	4.57398e-35	4.99766	0.128	0.029	1.53238e-30	Ependymal	Gm29683	4.41379
Intu	1.08073e-34	5.46911	0.294	0.116	3.62067e-30	Ependymal	Intu	2.53448
Rnf128	1.6964e-34	5.49509	0.151	0.039	5.68326e-30	Ependymal	Rnf128	3.87179
Plekhb1	2.15793e-34	19.4149	0.239	0.084	7.22951e-30	Ependymal	Plekhb1	2.84524
A230001M10Rik	2.55969e-34	6.70974	0.254	0.089	8.57546e-30	Ependymal	A230001M10Rik	2.85393
Itgb4	2.94112e-34	1.82501	0.124	0.027	9.85333e-30	Ependymal	Itgb4	4.59259
Nmb	7.17851e-34	1.24321	0.126	0.029	2.40495e-29	Ependymal	Nmb	4.34483
Pxk	1.03164e-33	3.22408	0.102	0.377	3.4562e-29	Ependymal	Pxk	0.270557
Efcab7	1.05621e-33	2.02219	0.258	0.095	3.53852e-29	Ependymal	Efcab7	2.71579
Lrig3	1.1847e-33	0.775914	0.188	0.056	3.96897e-29	Ependymal	Lrig3	3.35714
Kif24	1.4362e-33	1.29318	0.292	0.115	4.81154e-29	Ependymal	Kif24	2.53913
Prag1	1.48437e-33	28.482	0.493	0.277	4.97292e-29	Ependymal	Prag1	1.77978
Fgfr1	1.57235e-33	13.2333	0.369	0.172	5.26769e-29	Ependymal	Fgfr1	2.14535
Txn1	1.61364e-33	24.7296	0.316	0.139	5.40601e-29	Ependymal	Txn1	2.27338
Bok	1.8219e-33	2.19806	0.239	0.083	6.10371e-29	Ependymal	Bok	2.87952
Kremen1	3.32846e-33	1.91856	0.26	0.099	1.1151e-28	Ependymal	Kremen1	2.62626
Tango6	6.58078e-33	6.07294	0.384	0.182	2.20469e-28	Ependymal	Tango6	2.10989
Cep89	1.5561e-32	6.10052	0.367	0.169	5.21325e-28	Ependymal	Cep89	2.1716
Msn1	2.06469e-32	6.39097	0.149	0.039	6.91711e-28	Ependymal	Msn	3.82051
Plcb3	2.09341e-32	4.03185	0.115	0.025	7.01333e-28	Ependymal	Plcb3	4.6
Gm42902	2.3699e-32	0.601673	0.128	0.031	7.93964e-28	Ependymal	Gm42902	4.12903
Fbxo16	2.71366e-32	1.04676	0.305	0.126	9.09132e-28	Ependymal	Fbxo16	2.42063
Reln	3.21808e-32	4.75282	0.211	0.069	1.07812e-27	Ependymal	Reln	3.05797
Ankrd42	6.87133e-32	4.27951	0.388	0.189	2.30203e-27	Ependymal	Ankrd42	2.05291
Ift27	1.33071e-31	5.14455	0.228	0.082	4.45816e-27	Ependymal	Ift27	2.78049
Galk2	1.64504e-31	7.11622	0.539	0.309	5.51122e-27	Ependymal	Galk2	1.74434
Pdia4	1.81367e-31	16.6353	0.303	0.131	6.07616e-27	Ependymal	Pdia4	2.31298
Sec24d	3.93245e-31	9.64706	0.401	0.201	1.31745e-26	Ependymal	Sec24d	1.99502
Cep41	7.03229e-31	1.99614	0.143	0.038	2.35596e-26	Ependymal	Cep41	3.76316
2023-03-04	7.11297e-31	5.95219	0.356	0.163	2.38299e-26	Ependymal	2023-03-04	2.18405
Slc4a2	8.00249e-31	7.3117	0.237	0.087	2.68099e-26	Ependymal	Slc4a2	2.72414
Lacc1	8.27531e-31	0.508218	0.132	0.033	2.77239e-26	Ependymal	Lacc1	4
Dync2li1	8.61719e-31	4.59231	0.222	0.079	2.88693e-26	Ependymal	Dync2li1	2.81013
Efcc1	9.57619e-31	5.43491	0.166	0.048	3.20822e-26	Ependymal	Efcc1	3.45833
Cep131	9.88312e-31	2.93137	0.205	0.069	3.31104e-26	Ependymal	Cep131	2.97101
Sssca1	1.29601e-30	4.38384	0.126	0.031	4.34188e-26	Ependymal	Sssca1	4.06452
Fbxw10	1.57795e-30	1.31077	0.188	0.06	5.28644e-26	Ependymal	Fbxw10	3.13333
Cfap157	1.67538e-30	2.15489	0.205	0.07	5.61285e-26	Ependymal	Cfap157	2.92857
Mindy4	1.87204e-30	2.06098	0.296	0.124	6.27171e-26	Ependymal	Mindy4	2.3871
Zmiz1os1	1.9907e-30	3.09188	0.19	0.061	6.66924e-26	Ependymal	Zmiz1os1	3.11475
Nlrc4	2.35064e-30	5.16732	0.209	0.072	7.87512e-26	Ependymal	Nlrc4	2.90278
Ift22	2.69717e-30	10.9418	0.292	0.124	9.03607e-26	Ependymal	Ift22	2.35484
Dynll1	3.89623e-30	32.894	0.482	0.278	1.30531e-25	Ependymal	Dynll1	1.73381
Stpg2	4.06123e-30	3.53224	0.181	0.057	1.36059e-25	Ependymal	Stpg2	3.17544
Nphp1	4.40495e-30	18.0541	0.301	0.13	1.47575e-25	Ependymal	Nphp1	2.31538
Tead12	5.85415e-30	2.58915	0.409	0.203	1.96126e-25	Ependymal	Tead1	2.01478
Gas6	6.73044e-30	16.9162	0.452	0.248	2.25483e-25	Ependymal	Gas6	1.82258
Ephx11	1.0049e-29	0.650686	0.107	0.024	3.36663e-25	Ependymal	Ephx1	4.45833
Urod	1.09056e-29	0.747538	0.139	0.037	3.65361e-25	Ependymal	Urod	3.75676
Dchs1	1.28629e-29	0.957049	0.16	0.047	4.30932e-25	Ependymal	Dchs1	3.40426
Ift80	2.09268e-29	6.87357	0.352	0.168	7.0109e-25	Ependymal	Ift80	2.09524
Lrwd1	2.29126e-29	1.25328	0.179	0.057	7.67617e-25	Ependymal	Lrwd1	3.14035
Cep290	2.33153e-29	28.0655	0.501	0.306	7.81109e-25	Ependymal	Cep290	1.63725
Cyb5r3	2.76321e-29	4.59927	0.168	0.052	9.2573e-25	Ependymal	Cyb5r3	3.23077
Uckl1os	5.00668e-29	0.905812	0.145	0.04	1.67734e-24	Ependymal	Uckl1os	3.625
N4bp2l1	8.35597e-29	1.77763	0.092	0.337	2.79942e-24	Ependymal	N4bp2l1	0.272997
Nfia	1.00662e-28	14.1318	0.746	0.518	3.37239e-24	Ependymal	Nfia	1.44015
Efcab2	1.15257e-28	8.18871	0.384	0.2	3.86133e-24	Ependymal	Efcab2	1.92
Proser3	1.29292e-28	0.66498	0.124	0.031	4.33155e-24	Ependymal	Proser3	4
Lmo4	1.44403e-28	7.84632	0.279	0.12	4.83778e-24	Ependymal	Lmo4	2.325
Gm10138	1.9491e-28	0.789312	0.162	0.049	6.52986e-24	Ependymal	Gm10138	3.30612
C030037D09Rik	2.56735e-28	0.717383	0.132	0.035	8.60113e-24	Ependymal	C030037D09Rik	3.77143
Tmem47	3.22854e-28	34.0102	0.542	0.35	1.08163e-23	Ependymal	Tmem47	1.54857
Npas3	4.61634e-28	33.8116	0.817	0.631	1.54657e-23	Ependymal	Npas3	1.29477
Rsph14	6.01297e-28	6.77937	0.29	0.126	2.01446e-23	Ependymal	Rsph14	2.30159
Zfand4	2.25301e-27	6.34134	0.365	0.18	7.54805e-23	Ependymal	Zfand4	2.02778
Wwc1	3.85624e-27	50.6064	0.725	0.571	1.29192e-22	Ependymal	Wwc1	1.2697
Nrd1	6.28338e-27	9.65622	0.318	0.56	2.10506e-22	Ependymal	Nrd1	0.567857
S100a10	6.61461e-27	3.04477	0.139	0.04	2.21603e-22	Ependymal	S100a10	3.475
Gm405782	9.28302e-27	5.63872	0.371	0.186	3.11e-22	Ependymal	Gm40578	1.99462
Rps27l	1.23175e-26	5.9785	0.177	0.06	4.1266e-22	Ependymal	Rps27l	2.95
Eml4	1.7495e-26	3.66804	0.173	0.409	5.86117e-22	Ependymal	Eml4	0.422983
Phkg12	2.46979e-26	2.99341	0.365	0.178	8.27428e-22	Ependymal	Phkg1	2.05056
Sgms21	2.50305e-26	4.34761	0.186	0.064	8.3857e-22	Ependymal	Sgms2	2.90625
Fzd3	2.89279e-26	41.0601	0.493	0.301	9.69141e-22	Ependymal	Fzd3	1.63787
4430402I18Rik	3.77369e-26	10.7555	0.448	0.256	1.26426e-21	Ependymal	4430402I18Rik	1.75
Ccdc157	3.85088e-26	3.61682	0.269	0.117	1.29012e-21	Ependymal	Ccdc157	2.29915
Shroom3	4.86165e-26	12.6031	0.488	0.275	1.62875e-21	Ependymal	Shroom3	1.77455
Nck2	7.48415e-26	10.1597	0.452	0.266	2.50734e-21	Ependymal	Nck2	1.69925
Usp43	7.92649e-26	2.62573	0.177	0.059	2.65553e-21	Ependymal	Usp43	3
1700010K24Rik	1.24889e-25	0.616749	0.166	0.055	4.18403e-21	Ependymal	1700010K24Rik	3.01818
Morn1	1.48537e-25	7.63562	0.407	0.229	4.97627e-21	Ependymal	Morn1	1.77729
Arhgef12	3.03818e-25	2.07305	0.437	0.656	1.01785e-20	Ependymal	Arhgef12	0.666159
Gm9725	4.26422e-25	0.615867	0.151	0.048	1.4286e-20	Ependymal	Gm9725	3.14583
Eva1c	4.85324e-25	0.52622	0.117	0.031	1.62593e-20	Ependymal	Eva1c	3.77419
St8sia2	4.88473e-25	4.04411	0.288	0.129	1.63648e-20	Ependymal	St8sia2	2.23256
Bicc1	6.16256e-25	18.8932	0.439	0.249	2.06458e-20	Ependymal	Bicc1	1.76305
Ssh2	6.54575e-25	56.4744	0.431	0.707	2.19296e-20	Ependymal	Ssh2	0.609618
Pik3cb	8.48999e-25	13.2716	0.126	0.35	2.84432e-20	Ependymal	Pik3cb	0.36
Mdm1	8.74176e-25	6.79125	0.205	0.078	2.92866e-20	Ependymal	Mdm1	2.62821
Nat9	9.56071e-25	1.07846	0.156	0.051	3.20303e-20	Ependymal	Nat9	3.05882
Tmem67	1.09545e-24	7.72851	0.371	0.198	3.66999e-20	Ependymal	Tmem67	1.87374
Ap3m2	1.53129e-24	4.77491	0.337	0.171	5.13012e-20	Ependymal	Ap3m2	1.97076
Arhgdig	1.83268e-24	18.1562	0.269	0.123	6.13983e-20	Ependymal	Arhgdig	2.18699
Uhrf1bp1	1.94516e-24	2.83045	0.239	0.099	6.51666e-20	Ependymal	Uhrf1bp1	2.41414
Smpdl3a1	2.21116e-24	2.45987	0.217	0.086	7.40783e-20	Ependymal	Smpdl3a	2.52326
Wdr19	2.62797e-24	1.70683	0.299	0.141	8.80422e-20	Ependymal	Wdr19	2.12057
Rpgr	3.13622e-24	12.9068	0.488	0.304	1.0507e-19	Ependymal	Rpgr	1.60526
Stk11	3.26885e-24	4.07179	0.277	0.125	1.09513e-19	Ependymal	Stk11	2.216
Dnaaf5	4.3678e-24	2.80905	0.203	0.076	1.4633e-19	Ependymal	Dnaaf5	2.67105
Tgfbr31	4.39105e-24	0.662668	0.279	0.124	1.47109e-19	Ependymal	Tgfbr3	2.25
Fam114a1	4.94842e-24	0.530328	0.1	0.025	1.65782e-19	Ependymal	Fam114a1	4
Dchs2	5.55083e-24	3.54679	0.301	0.14	1.85964e-19	Ependymal	Dchs2	2.15
Fhit	6.18584e-24	45.7239	0.665	0.507	2.07238e-19	Ependymal	Fhit	1.31164
Frem11	6.35091e-24	0.813499	0.183	0.066	2.12768e-19	Ependymal	Frem1	2.77273
Cav21	6.78945e-24	0.687778	0.117	0.032	2.2746e-19	Ependymal	Cav2	3.65625
Slc35d1	7.90029e-24	16.2339	0.335	0.172	2.64676e-19	Ependymal	Slc35d1	1.94767
Pros1	9.38164e-24	5.39198	0.19	0.071	3.14304e-19	Ependymal	Pros1	2.67606
Ccdc181	1.44381e-23	3.06865	0.168	0.059	4.83707e-19	Ependymal	Ccdc181	2.84746
Ephx4	1.56936e-23	0.579687	0.181	0.065	5.25766e-19	Ependymal	Ephx4	2.78462
Rplp0	1.63554e-23	7.35159	0.339	0.177	5.47939e-19	Ependymal	Rplp0	1.91525
Rsph3b	1.895e-23	0.858762	0.217	0.087	6.34863e-19	Ependymal	Rsph3b	2.49425
Sec24a	3.83519e-23	26.9003	0.168	0.388	1.28487e-18	Ependymal	Sec24a	0.43299
Gm17018	4.04685e-23	11.3304	0.299	0.147	1.35577e-18	Ependymal	Gm17018	2.03401
Nubpl	4.66989e-23	2.70949	0.303	0.147	1.56451e-18	Ependymal	Nubpl	2.06122
Mipep	4.95613e-23	2.89884	0.318	0.159	1.6604e-18	Ependymal	Mipep	2
Bag2	4.97944e-23	1.04085	0.139	0.043	1.66821e-18	Ependymal	Bag2	3.23256
Atp1a1	8.29006e-23	9.41901	0.584	0.411	2.77733e-18	Ependymal	Atp1a1	1.42092
Zfp467	9.80503e-23	4.18762	0.222	0.093	3.28488e-18	Ependymal	Zfp467	2.3871
Tchp	1.09131e-22	1.20886	0.162	0.056	3.65611e-18	Ependymal	Tchp	2.89286
Hrh1	1.21609e-22	3.62332	0.051	0.25	4.07413e-18	Ependymal	Hrh1	0.204
Lca5	1.2898e-22	11.0982	0.443	0.269	4.32108e-18	Ependymal	Lca5	1.64684
Bbof1	1.50452e-22	9.40172	0.463	0.285	5.04045e-18	Ependymal	Bbof1	1.62456
Uhrf2	1.53423e-22	2.3805	0.23	0.457	5.13997e-18	Ependymal	Uhrf2	0.503282
Smad5	1.58879e-22	6.70383	0.29	0.141	5.32277e-18	Ependymal	Smad5	2.05674
Cbfa2t2	2.47584e-22	1.61418	0.232	0.462	8.29456e-18	Ependymal	Cbfa2t2	0.502165
Zfp521	6.72918e-22	5.28759	0.456	0.287	2.25441e-17	Ependymal	Zfp521	1.58885
Gm10076	7.08286e-22	12.0629	0.292	0.144	2.3729e-17	Ependymal	Gm10076	2.02778
Gldc	7.60244e-22	1.38644	0.145	0.048	2.54697e-17	Ependymal	Gldc	3.02083
C2cd3	7.83266e-22	4.83902	0.443	0.274	2.6241e-17	Ependymal	C2cd3	1.61679
Sugct1	8.32292e-22	5.08405	0.284	0.136	2.78834e-17	Ependymal	Sugct	2.08824
Tomm7	1.08663e-21	16.3881	0.284	0.14	3.64044e-17	Ependymal	Tomm7	2.02857
Ptges3	1.25976e-21	18.2076	0.45	0.286	4.22045e-17	Ependymal	Ptges3	1.57343
AC151836.1	1.46115e-21	11.3229	0.164	0.061	4.89515e-17	Ependymal	AC151836.1	2.68852
Ino80b	1.47354e-21	4.34434	0.192	0.076	4.93665e-17	Ependymal	Ino80b	2.52632
Cfap20	1.58121e-21	6.48879	0.403	0.237	5.29738e-17	Ependymal	Cfap20	1.70042
Mid1ip1	1.9229e-21	5.4365	0.249	0.114	6.44211e-17	Ependymal	Mid1ip1	2.18421
Fbxw9	1.97938e-21	0.621632	0.2	0.08	6.63133e-17	Ependymal	Fbxw9	2.5
Sdccag8	2.67755e-21	11.5756	0.569	0.411	8.97031e-17	Ependymal	Sdccag8	1.38443
Ngef	2.72915e-21	2.70353	0.203	0.082	9.1432e-17	Ependymal	Ngef	2.47561
Tex9	2.93339e-21	3.81253	0.369	0.204	9.82743e-17	Ependymal	Tex9	1.80882
Nr2f21	3.17585e-21	4.80671	0.141	0.047	1.06397e-16	Ependymal	Nr2f2	3
Tbc1d32	3.28707e-21	22.7271	0.478	0.299	1.10123e-16	Ependymal	Tbc1d32	1.59866
Ech1	3.73681e-21	6.85938	0.186	0.073	1.25191e-16	Ependymal	Ech1	2.54795
Rfx3	3.92946e-21	22.223	0.714	0.603	1.31645e-16	Ependymal	Rfx3	1.18408
Hist1h1c	4.46786e-21	4.18149	0.166	0.062	1.49682e-16	Ependymal	Hist1h1c	2.67742
Gm49417	4.60162e-21	9.55553	0.305	0.154	1.54164e-16	Ependymal	Gm49417	1.98052
Arl13b	5.24019e-21	6.67346	0.373	0.207	1.75557e-16	Ependymal	Arl13b	1.80193
Cavin3	5.34184e-21	2.09857	0.134	0.044	1.78962e-16	Ependymal	Cavin3	3.04545
Nsmce1	5.46998e-21	2.07097	0.136	0.045	1.83255e-16	Ependymal	Nsmce1	3.02222
Smim111	6.48011e-21	1.93095	0.143	0.048	2.17097e-16	Ependymal	Smim11	2.97917
Fkbp9	6.6282e-21	0.642245	0.164	0.06	2.22058e-16	Ependymal	Fkbp9	2.73333
Gphn	7.45033e-21	41.2777	0.84	0.936	2.49601e-16	Ependymal	Gphn	0.897436
Tbc1d31	7.98076e-21	6.42257	0.316	0.16	2.67372e-16	Ependymal	Tbc1d31	1.975
Eea1	8.07121e-21	26.3208	0.576	0.42	2.70402e-16	Ependymal	Eea1	1.37143
Hsp90ab1	8.10539e-21	81.8799	0.81	0.716	2.71547e-16	Ependymal	Hsp90ab1	1.13128
Mcee	8.22817e-21	2.04938	0.194	0.078	2.7566e-16	Ependymal	Mcee	2.48718
Plppr5	8.99782e-21	2.2954	0.072	0.264	3.01445e-16	Ependymal	Plppr5	0.272727
Hrk	1.15519e-20	0.922851	0.162	0.059	3.87012e-16	Ependymal	Hrk	2.74576
Ccng1	1.25533e-20	0.836718	0.179	0.069	4.2056e-16	Ependymal	Ccng1	2.5942
Rps14	1.48819e-20	8.81854	0.546	0.386	4.98575e-16	Ependymal	Rps14	1.41451
Sox11	1.52245e-20	2.73544	0.156	0.056	5.1005e-16	Ependymal	Sox1	2.78571
Arhgap18	2.23179e-20	13.459	0.495	0.315	7.47694e-16	Ependymal	Arhgap18	1.57143
Fam117a	2.85164e-20	0.629435	0.151	0.053	9.55356e-16	Ependymal	Fam117a	2.84906
Klhl7	3.02597e-20	2.4703	0.264	0.475	1.01376e-15	Ependymal	Klhl7	0.555789
Trp53inp1	3.25529e-20	1.55078	0.203	0.085	1.09059e-15	Ependymal	Trp53inp1	2.38824
Cd82	3.65142e-20	0.635661	0.143	0.049	1.2233e-15	Ependymal	Cd82	2.91837
Wdr38	4.33765e-20	0.60257	0.113	0.034	1.4532e-15	Ependymal	Wdr38	3.32353
Plagl1	4.65485e-20	0.576178	0.145	0.05	1.55947e-15	Ependymal	Plagl1	2.9
Cc2d2a	5.90318e-20	15.9749	0.418	0.256	1.97768e-15	Ependymal	Cc2d2a	1.63281
Pgk1	6.41133e-20	31.5273	0.388	0.233	2.14793e-15	Ependymal	Pgk1	1.66524
Grhpr	7.13708e-20	3.06285	0.209	0.089	2.39106e-15	Ependymal	Grhpr	2.34831
Tmem219	8.15054e-20	3.92096	0.262	0.127	2.73059e-15	Ependymal	Tmem219	2.06299
4932438H23Rik1	8.79772e-20	1.07	0.19	0.076	2.94741e-15	Ependymal	4932438H23Rik	2.5
Sec61b	9.49876e-20	2.59351	0.175	0.069	3.18227e-15	Ependymal	Sec61b	2.53623
Cdk5rap2	1.14605e-19	6.79211	0.452	0.293	3.83951e-15	Ependymal	Cdk5rap2	1.54266
Rnf32	1.5283e-19	6.40362	0.341	0.185	5.1201e-15	Ependymal	Rnf32	1.84324
Rpl7	1.80491e-19	13.6043	0.384	0.232	6.0468e-15	Ependymal	Rpl7	1.65517
Wnk1	1.82936e-19	13.1862	0.475	0.69	6.12873e-15	Ependymal	Wnk1	0.688406
Tcp11l2	2.31953e-19	1.74392	0.203	0.086	7.77088e-15	Ependymal	Tcp11l2	2.36047
Adgra3	2.6762e-19	0.680842	0.171	0.066	8.96579e-15	Ependymal	Adgra3	2.59091
Itga11	3.63235e-19	0.604032	0.19	0.078	1.21691e-14	Ependymal	Itga11	2.4359
1700013F07Rik	3.76712e-19	0.834598	0.179	0.072	1.26206e-14	Ependymal	1700013F07Rik	2.48611
Sod1	3.91928e-19	16.9994	0.375	0.22	1.31304e-14	Ependymal	Sod1	1.70455
Ift43	5.08635e-19	27.1735	0.465	0.3	1.70403e-14	Ependymal	Ift43	1.55
Srebf11	5.24755e-19	3.13553	0.277	0.142	1.75804e-14	Ependymal	Srebf1	1.9507
Aldh2	6.65899e-19	15.0797	0.254	0.124	2.23089e-14	Ependymal	Aldh2	2.04839
Diaph3	9.58096e-19	7.79838	0.258	0.126	3.20981e-14	Ependymal	Diaph3	2.04762
Itm2c	1.11622e-18	62.3494	0.682	0.554	3.73955e-14	Ependymal	Itm2c	1.23105
Parp41	1.17672e-18	0.792588	0.173	0.068	3.94225e-14	Ependymal	Parp4	2.54412
Cbs1	1.24867e-18	1.66161	0.198	0.085	4.18329e-14	Ependymal	Cbs	2.32941
Mif4gd	1.54212e-18	1.32563	0.151	0.057	5.16642e-14	Ependymal	Mif4gd	2.64912
Casd1	1.74244e-18	24.4967	0.486	0.328	5.83751e-14	Ependymal	Casd1	1.48171
Znhit1	1.9535e-18	4.86234	0.252	0.122	6.54461e-14	Ependymal	Znhit1	2.06557
4930522L14Rik	2.22717e-18	0.914674	0.162	0.063	7.46146e-14	Ependymal	4930522L14Rik	2.57143
Ccdc62	2.30943e-18	0.810814	0.247	0.117	7.73707e-14	Ependymal	Ccdc62	2.11111
Dalrd3	3.45855e-18	11.7549	0.403	0.246	1.15868e-13	Ependymal	Dalrd3	1.63821
Ppdpf	3.61117e-18	3.01303	0.156	0.061	1.20981e-13	Ependymal	Ppdpf	2.55738
Ruvbl1	3.73487e-18	4.068	0.213	0.098	1.25126e-13	Ependymal	Ruvbl1	2.17347
Slc22a4	3.83611e-18	3.77623	0.299	0.156	1.28517e-13	Ependymal	Slc22a4	1.91667
Jund	3.92559e-18	7.03489	0.365	0.223	1.31515e-13	Ependymal	Jund	1.63677
Ccdc148	4.81818e-18	8.06517	0.597	0.428	1.61419e-13	Ependymal	Ccdc148	1.39486
Pofut2	6.84988e-18	0.603018	0.177	0.072	2.29485e-13	Ependymal	Pofut2	2.45833
BC005624	8.20699e-18	10.8144	0.328	0.19	2.74951e-13	Ependymal	BC005624	1.72632
Hspe1	8.86237e-18	9.58415	0.311	0.177	2.96907e-13	Ependymal	Hspe1	1.75706
Galk1	8.87516e-18	2.26483	0.145	0.054	2.97335e-13	Ependymal	Galk1	2.68519
Ctnna1	9.39142e-18	22.5171	0.418	0.268	3.14631e-13	Ependymal	Ctnna1	1.5597
Gabarap	1.06346e-17	5.95347	0.339	0.201	3.5628e-13	Ependymal	Gabarap	1.68657
Dync2h1	1.67856e-17	21.3102	0.661	0.525	5.6235e-13	Ependymal	Dync2h1	1.25905
Nfatc2	1.69916e-17	0.736042	0.228	0.107	5.69253e-13	Ependymal	Nfatc2	2.13084
Tuba1b	1.81771e-17	8.58639	0.375	0.225	6.08968e-13	Ependymal	Tuba1b	1.66667
Spred1	1.90977e-17	1.82318	0.211	0.413	6.39811e-13	Ependymal	Spred1	0.510896
Rab36	2.42638e-17	2.63862	0.29	0.152	8.12886e-13	Ependymal	Rab36	1.90789
Hnrnpf	2.45815e-17	23.3862	0.367	0.228	8.23528e-13	Ependymal	Hnrnpf	1.60965
Zhx2	2.96147e-17	4.99392	0.39	0.244	9.9215e-13	Ependymal	Zhx2	1.59836
Spice1	3.24908e-17	10.875	0.258	0.129	1.08851e-12	Ependymal	Spice1	2
Stard132	3.65732e-17	2.40871	0.343	0.197	1.22528e-12	Ependymal	Stard13	1.74112
Hist1h2be	3.82466e-17	3.90515	0.258	0.132	1.28134e-12	Ependymal	Hist1h2be	1.95455
H2afv	4.20763e-17	7.17813	0.288	0.154	1.40964e-12	Ependymal	H2afv	1.87013
Tmem138	4.30146e-17	2.71693	0.262	0.133	1.44108e-12	Ependymal	Tmem138	1.96992
Plcd4	4.63094e-17	7.56765	0.279	0.148	1.55146e-12	Ependymal	Plcd4	1.88514
Rps3	5.77429e-17	15.4837	0.429	0.28	1.9345e-12	Ependymal	Rps3	1.53214
Fam213a	7.51845e-17	64.9623	0.264	0.146	2.51883e-12	Ependymal	Fam213a	1.80822
Arid4a	9.22855e-17	0.632951	0.279	0.464	3.09175e-12	Ependymal	Arid4a	0.601293
Ppfia1	9.86917e-17	10.7817	0.188	0.377	3.30637e-12	Ependymal	Ppfia1	0.498674
Ivns1abp	1.14432e-16	15.6277	0.409	0.265	3.83372e-12	Ependymal	Ivns1abp	1.5434
mt-Atp8	1.16054e-16	12.2272	0.168	0.071	3.88805e-12	Ependymal	mt-Atp8	2.3662
Kazn	2.85472e-16	2.64188	0.418	0.282	9.56388e-12	Ependymal	Kazn	1.48227
Itfg1	2.95391e-16	1.71909	0.36	0.536	9.89619e-12	Ependymal	Itfg1	0.671642
Tspan6	3.78474e-16	7.26146	0.164	0.07	1.26796e-11	Ependymal	Tspan6	2.34286
Lyrm1	5.20423e-16	1.03773	0.326	0.187	1.74352e-11	Ependymal	Lyrm1	1.74332
Sdhaf4	6.51834e-16	3.07654	0.16	0.067	2.18377e-11	Ependymal	Sdhaf4	2.38806
Avpi1	7.80362e-16	2.45121	0.164	0.071	2.61437e-11	Ependymal	Avpi1	2.30986
Serpini1	8.09013e-16	15.4844	0.055	0.204	2.71035e-11	Ependymal	Serpini1	0.269608
Cdk13	8.18024e-16	57.191	0.382	0.561	2.74055e-11	Ependymal	Cdk13	0.680927
Spata13	9.62816e-16	2.34926	0.243	0.124	3.22563e-11	Ependymal	Spata13	1.95968
Dnajc15	1.00517e-15	6.74697	0.358	0.221	3.36751e-11	Ependymal	Dnajc15	1.61991
Gatd1	1.07004e-15	1.02662	0.136	0.052	3.58485e-11	Ependymal	Gatd1	2.61538
Slc25a5	1.15355e-15	3.41196	0.277	0.15	3.86461e-11	Ependymal	Slc25a5	1.84667
Tet3	1.22319e-15	10.4856	0.247	0.424	4.09794e-11	Ependymal	Tet3	0.582547
Hspa4l	1.42294e-15	36.4899	0.552	0.411	4.76713e-11	Ependymal	Hspa4l	1.34307
Rpl14	1.43967e-15	8.26642	0.429	0.285	4.82317e-11	Ependymal	Rpl14	1.50526
Sf3b5	1.62551e-15	1.4842	0.164	0.071	5.44579e-11	Ependymal	Sf3b5	2.30986
Pbx4	1.87334e-15	1.8885	0.288	0.16	6.27608e-11	Ependymal	Pbx4	1.8
Zfp617	1.8954e-15	1.42751	0.183	0.083	6.34997e-11	Ependymal	Zfp617	2.20482
Psph	1.92963e-15	2.43922	0.177	0.079	6.46464e-11	Ependymal	Psph	2.24051
H1f0	2.00065e-15	0.912563	0.124	0.046	6.70259e-11	Ependymal	H1f0	2.69565
Ttc28	2.19663e-15	15.6681	0.695	0.603	7.35913e-11	Ependymal	Ttc28	1.15257
Ccdc34	2.25055e-15	28.0811	0.373	0.237	7.53978e-11	Ependymal	Ccdc34	1.57384
Gm16226	2.41257e-15	1.77041	0.028	0.163	8.08258e-11	Ependymal	Gm16226	0.171779
Gm17359	2.53815e-15	1.19719	0.126	0.047	8.50331e-11	Ependymal	Gm17359	2.68085
Col26a1	2.59388e-15	6.03796	0.281	0.145	8.69001e-11	Ependymal	Col26a1	1.93793
Hacl1	2.72021e-15	1.08112	0.128	0.048	9.11324e-11	Ependymal	Hacl1	2.66667
Lrrc2	2.72668e-15	0.527537	0.1	0.033	9.13491e-11	Ependymal	Lrrc2	3.0303
Etfa	2.85881e-15	10.7427	0.422	0.284	9.5776e-11	Ependymal	Etfa	1.48592
Ttc26	3.20523e-15	1.68157	0.311	0.175	1.07382e-10	Ependymal	Ttc26	1.77714
1110032A03Rik	3.24773e-15	7.38468	0.318	0.192	1.08805e-10	Ependymal	1110032A03Rik	1.65625
S1pr3	3.51024e-15	1.19427	0.126	0.047	1.176e-10	Ependymal	S1pr3	2.68085
Fam107a1	3.56934e-15	7.57925	0.211	0.103	1.1958e-10	Ependymal	Fam107a	2.04854
Slc16a11	4.5539e-15	0.753012	0.194	0.092	1.52565e-10	Ependymal	Slc16a1	2.1087
Hcfc1r1	4.62507e-15	3.70076	0.264	0.143	1.54949e-10	Ependymal	Hcfc1r1	1.84615
Romo1	4.867e-15	10.3725	0.237	0.123	1.63054e-10	Ependymal	Romo1	1.92683
Cop1	6.35683e-15	3.54433	0.294	0.465	2.12967e-10	Ependymal	Cop1	0.632258
Fam120c	6.57934e-15	0.876066	0.241	0.426	2.20421e-10	Ependymal	Fam120c	0.565728
Zfp704	7.91091e-15	15.4507	0.578	0.427	2.65031e-10	Ependymal	Zfp704	1.35363
Lamp21	1.0055e-14	0.652855	0.241	0.426	3.36862e-10	Ependymal	Lamp2	0.565728
Ubxn1	1.24008e-14	2.46374	0.252	0.135	4.15453e-10	Ependymal	Ubxn1	1.86667
2210408I21Rik	1.25799e-14	53.3153	0.682	0.578	4.21453e-10	Ependymal	2210408I21Rik	1.17993
Gnaq	1.38827e-14	8.40715	0.58	0.715	4.65099e-10	Ependymal	Gnaq	0.811189
Plpp1	1.47579e-14	14.5676	0.33	0.195	4.9442e-10	Ependymal	Plpp1	1.69231
Mdk1	1.50551e-14	0.981278	0.158	0.068	5.04375e-10	Ependymal	Mdk	2.32353
Lrp10	1.84145e-14	2.90414	0.186	0.087	6.16922e-10	Ependymal	Lrp10	2.13793
H2-K11	1.88379e-14	0.789109	0.164	0.073	6.31107e-10	Ependymal	H2-K1	2.24658
Rbm43	1.93394e-14	0.504484	0.109	0.039	6.47909e-10	Ependymal	Rbm43	2.79487
Gm100361	1.94229e-14	4.61967	0.151	0.065	6.50706e-10	Ependymal	Gm10036	2.32308
Scrn3	2.00351e-14	1.62623	0.168	0.075	6.71214e-10	Ependymal	Scrn3	2.24
Ift46	2.13249e-14	3.90037	0.273	0.151	7.14427e-10	Ependymal	Ift46	1.80795
Arvcf	2.13591e-14	3.70779	0.348	0.211	7.15572e-10	Ependymal	Arvcf	1.64929
Rdm1	2.21211e-14	0.754517	0.126	0.049	7.41101e-10	Ependymal	Rdm1	2.57143
Phf3	2.32245e-14	5.59215	0.39	0.57	7.78066e-10	Ependymal	Phf3	0.684211
Phkb	2.41939e-14	1.01175	0.35	0.516	8.10543e-10	Ependymal	Phkb	0.678295
Wbp11	2.43278e-14	5.00452	0.299	0.175	8.1503e-10	Ependymal	Wbp11	1.70857
Tmem1231	3.49651e-14	0.501184	0.119	0.046	1.1714e-09	Ependymal	Tmem123	2.58696
Prps2	3.53485e-14	0.511309	0.124	0.048	1.18425e-09	Ependymal	Prps2	2.58333
Gas2l1	3.55495e-14	2.13914	0.166	0.075	1.19098e-09	Ependymal	Gas2l1	2.21333
Rpl27-ps3	3.58798e-14	5.46952	0.181	0.086	1.20204e-09	Ependymal	Rpl27-ps3	2.10465
Pfdn5	4.10256e-14	7.48345	0.42	0.291	1.37444e-09	Ependymal	Pfdn5	1.4433
Dhrs31	4.35791e-14	1.15312	0.16	0.07	1.45999e-09	Ependymal	Dhrs3	2.28571
Ndufaf2	4.93613e-14	7.38704	0.358	0.226	1.6537e-09	Ependymal	Ndufaf2	1.58407
Cyb561	5.24156e-14	5.30159	0.267	0.146	1.75603e-09	Ependymal	Cyb561	1.82877
Kbtbd11	6.83462e-14	3.17494	0.196	0.096	2.28973e-09	Ependymal	Kbtbd11	2.04167
2023-06-01	7.64963e-14	5.26602	0.168	0.077	2.56278e-09	Ependymal	Jun	2.18182
Gpr137	1.01539e-13	5.36788	0.2	0.1	3.40177e-09	Ependymal	Gpr137	2
Cachd1	1.412e-13	11.21	0.52	0.402	4.73047e-09	Ependymal	Cachd1	1.29353
Bmpr1a	1.4556e-13	3.44256	0.284	0.457	4.87655e-09	Ependymal	Bmpr1a	0.621444
Fitm2	1.59575e-13	0.594657	0.151	0.066	5.34608e-09	Ependymal	Fitm2	2.28788
Id4	1.71332e-13	15.9901	0.488	0.349	5.73995e-09	Ependymal	Id4	1.39828
Ubc	1.80983e-13	3.97403	0.527	0.406	6.0633e-09	Ependymal	Ubc	1.29803
4933434E20Rik	1.84537e-13	73.7139	0.386	0.274	6.18235e-09	Ependymal	4933434E20Rik	1.40876
Mettl7a1	1.96038e-13	5.73505	0.281	0.167	6.56768e-09	Ependymal	Mettl7a1	1.68263
Cdc42ep41	1.96321e-13	0.718057	0.145	0.062	6.57715e-09	Ependymal	Cdc42ep4	2.33871
Lamb1	2.58586e-13	3.65784	0.168	0.077	8.66315e-09	Ependymal	Lamb1	2.18182
Flvcr1	2.70129e-13	11.3829	0.367	0.234	9.04986e-09	Ependymal	Flvcr1	1.56838
Mrpl39	3.0987e-13	0.764897	0.132	0.055	1.03813e-08	Ependymal	Mrpl39	2.4
Fgfr1op	3.40968e-13	2.10306	0.288	0.169	1.14231e-08	Ependymal	Fgfr1op	1.70414
Chmp2a	3.65442e-13	2.5789	0.241	0.135	1.2243e-08	Ependymal	Chmp2a	1.78519
Tmem116	4.71295e-13	1.48976	0.209	0.107	1.57893e-08	Ependymal	Tmem116	1.95327
Cmss1	5.95807e-13	72.7985	0.938	0.896	1.99607e-08	Ependymal	Cmss1	1.04688
Map2k1	6.2139e-13	0.651607	0.181	0.34	2.08178e-08	Ependymal	Map2k1	0.532353
Faf2	6.71082e-13	0.548883	0.171	0.327	2.24826e-08	Ependymal	Faf2	0.522936
Ptbp1	7.34942e-13	2.90774	0.171	0.081	2.4622e-08	Ependymal	Ptbp1	2.11111
Parva1	8.28177e-13	1.37981	0.19	0.094	2.77456e-08	Ependymal	Parva	2.02128
Naf1	8.4367e-13	0.886597	0.19	0.094	2.82646e-08	Ependymal	Naf1	2.02128
Acaa2	9.26712e-13	1.22987	0.119	0.048	3.10467e-08	Ependymal	Acaa2	2.47917
Sirt3	1.03338e-12	2.85097	0.294	0.174	3.46203e-08	Ependymal	Sirt3	1.68966
Pamr1	1.12699e-12	14.4293	0.309	0.185	3.77563e-08	Ependymal	Pamr1	1.67027
Airn	1.22788e-12	6.25645	0.288	0.173	4.11365e-08	Ependymal	Airn	1.66474
Foxo11	1.30133e-12	4.19459	0.318	0.195	4.3597e-08	Ependymal	Foxo1	1.63077
Pink1	1.39468e-12	8.05535	0.313	0.193	4.67244e-08	Ependymal	Pink1	1.62176
Calm1	1.44457e-12	128.028	0.878	0.843	4.83961e-08	Ependymal	Calm1	1.04152
Myh14	1.52875e-12	3.91491	0.211	0.109	5.12161e-08	Ependymal	Myh14	1.93578
Anapc13	1.6235e-12	2.11357	0.158	0.073	5.43903e-08	Ependymal	Anapc13	2.16438
Fam161b	1.66133e-12	4.15395	0.175	0.085	5.56578e-08	Ependymal	Fam161b	2.05882
Wls	2.01831e-12	28.8616	0.597	0.485	6.76174e-08	Ependymal	Wls	1.23093
Hspd1	2.11565e-12	10.0605	0.375	0.251	7.08785e-08	Ependymal	Hspd1	1.49402
Tfdp2	2.23291e-12	3.9611	0.228	0.379	7.48069e-08	Ependymal	Tfdp2	0.601583
Nck1	2.70274e-12	2.65819	0.141	0.289	9.05472e-08	Ependymal	Nck1	0.487889
Tsc22d2	2.98563e-12	0.760653	0.239	0.403	1.00025e-07	Ependymal	Tsc22d2	0.593052
Rb1	4.1038e-12	3.22666	0.348	0.516	1.37486e-07	Ependymal	Rb1	0.674419
Pou3f21	4.36212e-12	0.502563	0.156	0.072	1.4614e-07	Ependymal	Pou3f2	2.16667
Acad12	4.87279e-12	0.521314	0.111	0.044	1.63248e-07	Ependymal	Acad12	2.52273
Rpl18	5.23314e-12	6.82955	0.38	0.26	1.75321e-07	Ependymal	Rpl18	1.46154
Pcnx4	5.28854e-12	2.97311	0.318	0.203	1.77177e-07	Ependymal	Pcnx4	1.5665
Rps5	5.29889e-12	20.6827	0.356	0.24	1.77523e-07	Ependymal	Rps5	1.48333
Cpe	5.49082e-12	12.6195	0.789	0.856	1.83953e-07	Ependymal	Cpe	0.921729
9530077C05Rik	5.59457e-12	0.886572	0.252	0.145	1.87429e-07	Ependymal	9530077C05Rik	1.73793
Manf	6.36046e-12	4.01793	0.241	0.403	2.13088e-07	Ependymal	Manf	0.598015
Map1lc3a	6.38897e-12	2.77916	0.32	0.205	2.14043e-07	Ependymal	Map1lc3a	1.56098
Rest	7.34426e-12	1.26889	0.141	0.063	2.46047e-07	Ependymal	Rest	2.2381
Morn2	8.15159e-12	7.9533	0.247	0.144	2.73095e-07	Ependymal	Morn2	1.71528
Ubald2	8.19375e-12	2.06694	0.143	0.065	2.74507e-07	Ependymal	Ubald2	2.2
Eif1a	8.50317e-12	1.79533	0.213	0.114	2.84873e-07	Ependymal	Eif1a	1.86842
Snrpd2	8.84417e-12	2.71282	0.207	0.113	2.96297e-07	Ependymal	Snrpd2	1.83186
Rdh10	9.05835e-12	1.34537	0.19	0.098	3.03473e-07	Ependymal	Rdh10	1.93878
Prrt1	9.39689e-12	3.1383	0.307	0.189	3.14815e-07	Ependymal	Prrt1	1.62434
Cystm1	9.47862e-12	2.62866	0.226	0.129	3.17553e-07	Ependymal	Cystm1	1.75194
Nkain4	1.23357e-11	8.92426	0.305	0.184	4.13271e-07	Ependymal	Nkain4	1.65761
Hint2	1.26673e-11	2.24368	0.188	0.098	4.24382e-07	Ependymal	Hint2	1.91837
Ttc231	1.26933e-11	0.84578	0.222	0.122	4.25252e-07	Ependymal	Ttc23	1.81967
Agbl4	1.32021e-11	55.9097	0.806	0.659	4.42296e-07	Ependymal	Agbl4	1.22307
Il31ra	1.46831e-11	4.25922	0.318	0.205	4.91912e-07	Ependymal	Il31ra	1.55122
Canx	1.57371e-11	5.24556	0.488	0.648	5.27223e-07	Ependymal	Canx	0.753086
Eef2k	1.6574e-11	5.75354	0.373	0.262	5.55263e-07	Ependymal	Eef2k	1.42366
Matn2	1.95297e-11	1.86286	0.134	0.061	6.54285e-07	Ependymal	Matn2	2.19672
Med19	2.11085e-11	1.33982	0.194	0.104	7.07176e-07	Ependymal	Med19	1.86538
Dnajc3	2.1408e-11	27.9681	0.461	0.365	7.17211e-07	Ependymal	Dnajc3	1.26301
Cpne2	2.21721e-11	2.68926	0.348	0.229	7.4281e-07	Ependymal	Cpne2	1.51965
Ap3m1	2.68344e-11	2.5096	0.147	0.295	8.99007e-07	Ependymal	Ap3m1	0.498305
Nudcd3	2.92035e-11	2.47823	0.384	0.54	9.78377e-07	Ependymal	Nudcd3	0.711111
Cerkl	3.01492e-11	0.590973	0.111	0.046	1.01006e-06	Ependymal	Cerkl	2.41304
Rps27rt	3.14072e-11	39.0605	0.222	0.13	1.0522e-06	Ependymal	Rps27rt	1.70769
Stxbp4	3.2764e-11	12.4276	0.48	0.348	1.09766e-06	Ependymal	Stxbp4	1.37931
Spag1	3.56624e-11	0.950754	0.217	0.122	1.19476e-06	Ependymal	Spag1	1.77869
Kiz	3.74121e-11	3.94874	0.358	0.239	1.25338e-06	Ependymal	Kiz	1.49791
Sgce	3.96388e-11	2.64514	0.22	0.372	1.32798e-06	Ependymal	Sgce	0.591398
Prdx6	3.99154e-11	36.2311	0.45	0.34	1.33725e-06	Ependymal	Prdx6	1.32353
Mrpl34	4.01806e-11	1.38262	0.154	0.074	1.34613e-06	Ependymal	Mrpl34	2.08108
Hmgn1	4.14572e-11	14.164	0.294	0.189	1.3889e-06	Ependymal	Hmgn1	1.55556
Nemp1	4.16304e-11	0.808883	0.154	0.074	1.3947e-06	Ependymal	Nemp1	2.08108
Paics	4.34667e-11	1.65231	0.222	0.123	1.45622e-06	Ependymal	Paics	1.80488
Polr2i1	5.2989e-11	1.64765	0.141	0.066	1.77524e-06	Ependymal	Polr2i	2.13636
4930412C18Rik	6.41985e-11	0.643466	0.128	0.058	2.15078e-06	Ependymal	4930412C18Rik	2.2069
Scand1	6.49946e-11	6.85807	0.235	0.139	2.17745e-06	Ependymal	Scand1	1.69065
Scaf8	6.62691e-11	5.07948	0.416	0.557	2.22015e-06	Ependymal	Scaf8	0.746858
Adh5	8.84449e-11	1.15553	0.166	0.084	2.96308e-06	Ependymal	Adh5	1.97619
Nek4	9.21678e-11	1.70973	0.258	0.153	3.08781e-06	Ependymal	Nek4	1.68627
Dad1	1.24777e-10	31.8515	0.403	0.3	4.18028e-06	Ependymal	Dad1	1.34333
Lmln	1.34204e-10	1.75643	0.262	0.16	4.49611e-06	Ependymal	Lmln	1.6375
B230354K17Rik	1.40199e-10	0.574039	0.183	0.096	4.69695e-06	Ependymal	B230354K17Rik	1.90625
Dgcr6	1.41953e-10	2.23257	0.203	0.113	4.7557e-06	Ependymal	Dgcr6	1.79646
Tspan15	1.47334e-10	1.14867	0.237	0.139	4.936e-06	Ependymal	Tspan15	1.70504
Rpl4	1.51414e-10	2.55427	0.318	0.21	5.07269e-06	Ependymal	Rpl4	1.51429
Mkrn1	1.57777e-10	8.99714	0.335	0.227	5.28584e-06	Ependymal	Mkrn1	1.47577
B230118H07Rik	1.76805e-10	5.28643	0.277	0.172	5.92333e-06	Ependymal	B230118H07Rik	1.61047
Ltbp1	1.82521e-10	1.06871	0.013	0.102	6.11482e-06	Ependymal	Ltbp1	0.127451
Ift172	2.04309e-10	8.89303	0.318	0.211	6.84476e-06	Ependymal	Ift172	1.50711
Hmg20b1	2.05115e-10	0.723361	0.124	0.056	6.87176e-06	Ependymal	Hmg20b	2.21429
Lrp8	2.05448e-10	31.4447	0.49	0.39	6.88293e-06	Ependymal	Lrp8	1.25641
4930444P10Rik	2.09057e-10	1.56277	0.168	0.087	7.00381e-06	Ependymal	4930444P10Rik	1.93103
Edem3	2.09603e-10	3.50444	0.177	0.309	7.02212e-06	Ependymal	Edem3	0.572816
1810037I17Rik	2.15667e-10	5.30032	0.222	0.13	7.22527e-06	Ependymal	1810037I17Rik	1.70769
Wdr34	2.26762e-10	3.77441	0.241	0.142	7.59699e-06	Ependymal	Wdr34	1.69718
2023-03-06	2.28357e-10	5.06293	0.407	0.538	7.65043e-06	Ependymal	2023-03-06	0.756506
Ankrd45	2.50067e-10	5.65883	0.35	0.23	8.37774e-06	Ependymal	Ankrd45	1.52174
Cep164	2.72883e-10	2.10701	0.418	0.3	9.14213e-06	Ependymal	Cep164	1.39333
Clip4	2.75037e-10	2.60784	0.254	0.152	9.21429e-06	Ependymal	Clip4	1.67105
Phactr4	2.76698e-10	3.0467	0.256	0.156	9.26995e-06	Ependymal	Phactr4	1.64103
Rfc2	3.0043e-10	1.37693	0.213	0.121	1.0065e-05	Ependymal	Rfc2	1.76033
Bri3	3.24483e-10	8.85113	0.301	0.198	1.08708e-05	Ependymal	Bri3	1.5202
Fxr1	3.62971e-10	12.5429	0.397	0.534	1.21603e-05	Ependymal	Fxr1	0.743446
Rccd1	4.18431e-10	0.643174	0.177	0.093	1.40183e-05	Ependymal	Rccd1	1.90323
Rpap3	4.57668e-10	2.66597	0.239	0.143	1.53328e-05	Ependymal	Rpap3	1.67133
Sox2	4.65611e-10	14.0534	0.271	0.173	1.55989e-05	Ependymal	Sox2	1.56647
Magoh	4.65712e-10	0.624735	0.156	0.078	1.56023e-05	Ependymal	Magoh	2
Gm12296	4.75997e-10	2.26234	0.128	0.059	1.59469e-05	Ependymal	Gm12296	2.16949
Rnf114	5.15316e-10	1.89663	0.296	0.19	1.72641e-05	Ependymal	Rnf114	1.55789
Hirip3	5.21816e-10	3.5197	0.194	0.108	1.74819e-05	Ependymal	Hirip3	1.7963
Dusp14	5.25674e-10	3.09551	0.205	0.114	1.76111e-05	Ependymal	Dusp14	1.79825
Rpl22	5.88316e-10	8.62637	0.316	0.214	1.97098e-05	Ependymal	Rpl22	1.47664
Mrfap1	6.28383e-10	3.69637	0.38	0.272	2.10521e-05	Ependymal	Mrfap1	1.39706
Dhrs7	7.76696e-10	5.4207	0.211	0.124	2.60209e-05	Ependymal	Dhrs7	1.70161
Tigd2	8.93087e-10	6.81723	0.294	0.193	2.99202e-05	Ependymal	Tigd2	1.52332
Cdkl3	9.23876e-10	3.83078	0.365	0.265	3.09517e-05	Ependymal	Cdkl3	1.37736
Mdm2	1.08584e-09	4.93536	0.348	0.245	3.63777e-05	Ependymal	Mdm2	1.42041
Fbxo32	1.2148e-09	0.55853	0.156	0.08	4.06984e-05	Ependymal	Fbxo32	1.95
Thnsl1	1.29756e-09	0.737316	0.173	0.092	4.34707e-05	Ependymal	Thnsl1	1.88043
Fyttd1	1.38112e-09	3.90312	0.245	0.374	4.62702e-05	Ependymal	Fyttd1	0.65508
Slc39a121	1.40412e-09	9.16416	0.401	0.265	4.70409e-05	Ependymal	Slc39a12	1.51321
Ift122	1.44584e-09	3.91674	0.305	0.204	4.84387e-05	Ependymal	Ift122	1.4951
Slf1	1.56313e-09	8.33507	0.501	0.403	5.23681e-05	Ependymal	Slf1	1.24318
Dazap21	1.69111e-09	2.30171	0.158	0.083	5.66556e-05	Ependymal	Dazap2	1.90361
Ddt	1.69183e-09	8.09183	0.158	0.082	5.66798e-05	Ependymal	Ddt	1.92683
Dyrk2	1.7036e-09	2.3222	0.147	0.074	5.7074e-05	Ependymal	Dyrk2	1.98649
Usp2	1.81991e-09	13.6767	0.399	0.296	6.09705e-05	Ependymal	Usp2	1.34797
D3Ertd751e	1.82253e-09	6.4158	0.377	0.277	6.10584e-05	Ependymal	D3Ertd751e	1.36101
Erlec1	1.91923e-09	0.893531	0.256	0.389	6.42982e-05	Ependymal	Erlec1	0.658098
Gm17135	1.98064e-09	1.10833	0.207	0.119	6.63555e-05	Ependymal	Gm17135	1.7395
Zbtb18	2.06312e-09	0.534781	0.115	0.053	6.91186e-05	Ependymal	Zbtb18	2.16981
Nipal2	2.13634e-09	5.41618	0.518	0.386	7.15715e-05	Ependymal	Nipal2	1.34197
Fuom	2.15941e-09	1.9925	0.158	0.083	7.23447e-05	Ependymal	Fuom	1.90361
Sem1	2.59792e-09	15.8883	0.307	0.212	8.70355e-05	Ependymal	Sem1	1.44811
Xpc	2.75551e-09	3.04141	0.196	0.112	9.23151e-05	Ependymal	Xpc	1.75
Tmem56	2.88228e-09	2.30048	0.145	0.263	9.65621e-05	Ependymal	Tmem56	0.551331
Nipbl	2.99462e-09	0.847436	0.518	0.669	0.000100326	Ependymal	Nipbl	0.77429
Tmem218	3.3268e-09	0.585818	0.179	0.099	0.000111454	Ependymal	Tmem218	1.80808
Rpl8	3.58466e-09	10.6324	0.499	0.41	0.000120093	Ependymal	Rpl8	1.21707
Gprc5b	4.22393e-09	9.59346	0.386	0.277	0.00014151	Ependymal	Gprc5b	1.3935
Gnai21	5.10953e-09	5.40457	0.345	0.245	0.000171179	Ependymal	Gnai2	1.40816
Nol7	5.16151e-09	4.26368	0.267	0.172	0.000172921	Ependymal	Nol7	1.55233
Mpp1	5.75823e-09	1.30744	0.186	0.106	0.000192912	Ependymal	Mpp1	1.75472
Bmp2k	6.14854e-09	1.1077	0.365	0.261	0.000205988	Ependymal	Bmp2k	1.39847
[truncated: 14,754 more rows]

## Sheet: Supplementary File 1b
Supplementary File 1b. Differential gene expression analysis for all neurons
genes	p_val	avg_log2FC	pct.1	pct.2	p_val_adj	cluster	gene	pct_ratio
Pcsk5	0	24.7773	0.91	0.485	0	0	Pcsk5	1.87629
Hcn1	0	19.0048	0.944	0.563	0	0	Hcn1	1.67673
Gm28905	9.87295e-304	1.64199	0.958	0.663	3.30764e-299	0	Gm28905	1.44495
Gulp1	4.05121e-275	1.62499	0.882	0.515	1.35724e-270	0	Gulp1	1.71262
Sema6d	1.57506e-274	6.02319	0.968	0.75	5.27678e-270	0	Sema6d	1.29067
Kcnq5	2.51714e-252	23.2649	0.995	0.767	8.43293e-248	0	Kcnq5	1.29726
Snx31	3.67626e-246	2.25191	0.594	0.235	1.23162e-241	0	Snx31	2.52766
Syn2	2.40234e-236	34.8621	0.997	0.896	8.04832e-232	0	Syn2	1.11272
Epb41l4a	6.12762e-235	8.46181	0.849	0.543	2.05288e-230	0	Epb41l4a	1.56354
Slc30a3	3.0492e-225	2.88252	0.514	0.19	1.02154e-220	0	Slc30a3	2.70526
Egflam	2.0384e-209	3.58399	0.34	0.086	6.82905e-205	0	Egflam	3.95349
C1ql3	1.28748e-203	5.53109	0.887	0.571	4.31331e-199	0	C1ql3	1.55342
Syt17	4.80189e-202	3.94071	0.842	0.525	1.60873e-197	0	Syt17	1.60381
Brinp1	2.1025e-201	1.69493	0.991	0.892	7.04381e-197	0	Brinp1	1.11099
Astn2	7.94078e-187	2.95453	0.99	0.927	2.66032e-182	0	Astn2	1.06796
Rmst	6.12623e-186	18.8012	0.998	0.927	2.05241e-181	0	Rmst	1.07659
Lmo7	2.18931e-180	2.62423	0.847	0.578	7.33462e-176	0	Lmo7	1.4654
Atg7	9.85116e-176	4.46476	0.735	0.462	3.30034e-171	0	Atg7	1.59091
Unc5b	1.10815e-168	2.43534	0.485	0.206	3.71253e-164	0	Unc5b	2.35437
Drd2	1.91051e-159	0.594564	0.318	0.095	6.40061e-155	0	Drd2	3.34737
Gm28376	9.16979e-157	1.57274	0.648	0.35	3.07206e-152	0	Gm28376	1.85143
Fbln1	9.67085e-157	2.50115	0.624	0.337	3.23993e-152	0	Fbln1	1.85163
Rap1gap2	1.14766e-151	9.03546	0.857	0.624	3.8449e-147	0	Rap1gap2	1.3734
Oprk1	3.97047e-150	1.36697	0.534	0.256	1.33019e-145	0	Oprk1	2.08594
Plxna2	1.2317e-146	3.26794	0.822	0.585	4.12645e-142	0	Plxna2	1.40513
Slc7a8	1.45375e-139	20.6891	0.829	0.591	4.87034e-135	0	Slc7a8	1.40271
Arhgef26	2.48489e-139	2.82005	0.378	0.147	8.32488e-135	0	Arhgef26	2.57143
Slc1a2	9.1938e-134	4.14955	0.955	0.796	3.08011e-129	0	Slc1a2	1.19975
Mkx	2.98312e-132	5.21048	0.493	0.231	9.99406e-128	0	Mkx	2.1342
Mcf2	2.10761e-130	0.686073	0.564	0.296	7.06092e-126	0	Mcf2	1.90541
Magi2	7.18813e-130	43.5333	1	0.991	2.40817e-125	0	Magi2	1.00908
Gm20754	2.38952e-128	10.9983	0.963	0.772	8.00538e-124	0	Gm20754	1.24741
4933413L06Rik	1.82488e-127	0.739832	0.434	0.192	6.11371e-123	0	4933413L06Rik	2.26042
Hoga1	1.70772e-120	1.07169	0.255	0.078	5.72122e-116	0	Hoga1	3.26923
Prickle1	4.28065e-120	0.915799	0.966	0.811	1.4341e-115	0	Prickle1	1.19112
Timp4	7.16181e-116	5.85998	0.709	0.473	2.39935e-111	0	Timp4	1.49894
Lemd1	3.44448e-115	1.39995	0.526	0.282	1.15397e-110	0	Lemd1	1.86525
Sfmbt2	3.70289e-115	1.71299	0.589	0.342	1.24054e-110	0	Sfmbt2	1.72222
Plekha7	3.03838e-114	1.30306	0.776	0.538	1.01792e-109	0	Plekha7	1.44238
Mcub	5.98502e-111	1.55985	0.487	0.251	2.0051e-106	0	Mcub	1.94024
Jph1	1.22649e-110	0.952961	0.492	0.253	4.10898e-106	0	Jph1	1.94466
Sptb	9.20035e-110	4.35597	0.766	0.542	3.0823e-105	0	Sptb	1.41328
Amph	3.28351e-109	4.52802	0.98	0.907	1.10004e-104	0	Amph	1.08049
Xkr4	3.91803e-108	1.29295	1	0.97	1.31262e-103	0	Xkr4	1.03093
Cadps	7.43129e-106	7.46589	0.994	0.901	2.48963e-101	0	Cadps	1.10322
Ttc28	9.27715e-106	1.46631	0.886	0.678	3.10803e-101	0	Ttc28	1.30678
Egfl6	1.00254e-104	0.875665	0.204	0.057	3.35872e-100	0	Egfl6	3.57895
Esr1	8.39228e-104	6.51625	0.239	0.078	2.81158e-99	0	Esr1	3.0641
D030068K23Rik	1.72269e-100	3.06737	0.934	0.759	5.77137e-96	0	D030068K23Rik	1.23057
Crb1	3.70666e-100	9.11904	0.743	0.527	1.24181e-95	0	Crb1	1.40987
Prlr	5.75112e-99	2.26856	0.504	0.273	1.92674e-94	0	Prlr	1.84615
Gm1992	1.55308e-98	10.1341	0.856	0.653	5.20314e-94	0	Gm1992	1.31087
Mtnr1a	1.9119e-98	1.07943	0.254	0.09	6.40526e-94	0	Mtnr1a	2.82222
Epha3	2.36375e-97	5.49607	0.854	0.627	7.91904e-93	0	Epha3	1.36204
Ddah1	7.02995e-97	8.0105	0.859	0.657	2.35517e-92	0	Ddah1	1.30746
Gabra2	7.07174e-97	4.69564	0.978	0.905	2.36917e-92	0	Gabra2	1.08066
Ptger3	1.26273e-93	1.06514	0.359	0.166	4.23041e-89	0	Ptger3	2.16265
Sema5b	2.04478e-90	3.22208	0.37	0.173	6.85041e-86	0	Sema5b	2.13873
Prox1	7.80547e-90	7.94225	0.817	0.595	2.61499e-85	0	Prox1	1.37311
Gm15345	1.28233e-89	3.77108	0.479	0.268	4.29606e-85	0	Gm15345	1.78731
4930598N05Rik	9.16565e-86	1.95599	0.376	0.188	3.07068e-81	0	4930598N05Rik	2
Vsnl1	2.89003e-83	7.10013	0.93	0.782	9.68218e-79	0	Vsnl1	1.18926
Gm12027	1.09688e-81	1.85532	0.561	0.35	3.67475e-77	0	Gm12027	1.60286
Slc9b2	3.18893e-81	1.11247	0.466	0.265	1.06836e-76	0	Slc9b2	1.75849
Dab2ip	2.04378e-80	3.62889	0.818	0.644	6.84706e-76	0	Dab2ip	1.27019
Gm12828	2.05352e-80	5.14836	0.595	0.381	6.87969e-76	0	Gm12828	1.56168
9130019P16Rik	2.39865e-77	1.5084	0.31	0.147	8.03594e-73	0	9130019P16Rik	2.10884
Dsel	7.37598e-75	0.663141	0.572	0.372	2.4711e-70	0	Dsel	1.53763
Bdnf	2.96496e-74	11.8974	0.421	0.225	9.93319e-70	0	Bdnf	1.87111
Cfap74	1.19041e-72	3.12659	0.67	0.475	3.98812e-68	0	Cfap74	1.41053
Runx2	9.33728e-72	0.939679	0.64	0.437	3.12817e-67	0	Runx2	1.46453
Nr3c2	2.0376e-71	5.90359	0.778	0.605	6.82635e-67	0	Nr3c2	1.28595
Adgrg2	2.65262e-70	2.37911	0.301	0.143	8.88682e-66	0	Adgrg2	2.1049
Car8	8.14207e-69	0.621634	0.345	0.176	2.72775e-64	0	Car8	1.96023
Angpt2	8.39978e-69	4.07789	0.554	0.362	2.81409e-64	0	Angpt2	1.53039
Mcph1	2.64179e-68	6.3182	0.742	0.577	8.85053e-64	0	Mcph1	1.28596
Ptpn13	3.71517e-68	4.36534	0.451	0.267	1.24466e-63	0	Ptpn13	1.68914
Pbx1	6.82123e-67	43.5328	0.992	0.966	2.28525e-62	0	Pbx1	1.02692
Doc2b	3.07791e-65	1.09948	0.445	0.265	1.03116e-60	0	Doc2b	1.67925
Osbpl10	2.54906e-64	2.51298	0.76	0.593	8.53986e-60	0	Osbpl10	1.28162
Nek10	8.50965e-63	1.60574	0.625	0.416	2.8509e-58	0	Nek10	1.5024
Ust	1.23373e-62	1.45776	0.468	0.283	4.13323e-58	0	Ust	1.65371
Zfhx3	2.82471e-61	29.1063	0.996	0.888	9.46336e-57	0	Zfhx3	1.12162
Zbtb38	2.55895e-60	2.51578	0.818	0.685	8.573e-56	0	Zbtb38	1.19416
A430090L17Rik	1.69221e-59	2.74894	0.465	0.297	5.66923e-55	0	A430090L17Rik	1.56566
St6gal2	6.38458e-58	1.41489	0.724	0.561	2.13896e-53	0	St6gal2	1.29055
Grik3	7.87728e-58	1.23655	0.638	0.457	2.63905e-53	0	Grik3	1.39606
Robo2	8.5329e-58	7.25501	0.861	0.695	2.85869e-53	0	Robo2	1.23885
Gm48281	9.03955e-58	0.570557	0.247	0.114	3.02843e-53	0	Gm48281	2.16667
Ndrg1	9.9462e-58	5.81623	0.444	0.277	3.33218e-53	0	Ndrg1	1.60289
Exph5	2.76462e-56	1.73396	0.418	0.254	9.26203e-52	0	Exph5	1.64567
Iqsec1	3.05789e-55	9.49062	0.92	0.82	1.02445e-50	0	Iqsec1	1.12195
Hrh3	4.27719e-55	0.715522	0.494	0.327	1.43294e-50	0	Hrh3	1.5107
Plekha5	4.5602e-55	1.08466	0.963	0.871	1.52776e-50	0	Plekha5	1.10563
Gm32618	5.23988e-55	0.993052	0.493	0.322	1.75546e-50	0	Gm32618	1.53106
Mindy3	4.49574e-54	2.30207	0.635	0.477	1.50616e-49	0	Mindy3	1.33124
Cda	1.47169e-53	0.686078	0.33	0.181	4.93045e-49	0	Cda	1.8232
Lhx2	6.99982e-53	0.735613	0.458	0.29	2.34508e-48	0	Lhx2	1.57931
Suco	2.27481e-52	1.0831	0.759	0.627	7.62107e-48	0	Suco	1.21053
4930590L20Rik	3.31309e-52	2.12436	0.469	0.303	1.10995e-47	0	4930590L20Rik	1.54785
Cpne6	5.4407e-52	0.729758	0.523	0.355	1.82274e-47	0	Cpne6	1.47324
Tbc1d8	3.94825e-51	2.16914	0.575	0.41	1.32274e-46	0	Tbc1d8	1.40244
Ralb	4.67982e-50	0.688073	0.3	0.164	1.56783e-45	0	Ralb	1.82927
Adcyap1r1	4.50067e-49	0.539512	0.563	0.401	1.50781e-44	0	Adcyap1r1	1.40399
Pter	2.22531e-47	0.568267	0.275	0.146	7.45524e-43	0	Pter	1.88356
Slit1	9.81862e-47	10.8043	0.606	0.45	3.28943e-42	0	Slit1	1.34667
Smarca2	1.75928e-45	1.2597	0.877	0.758	5.89393e-41	0	Smarca2	1.15699
Gfod1	7.04603e-45	2.44138	0.695	0.532	2.36056e-40	0	Gfod1	1.30639
Gm48370	1.32366e-44	1.06511	0.151	0.061	4.43452e-40	0	Gm48370	2.47541
Glis1	4.60936e-44	1.89164	0.394	0.24	1.54423e-39	0	Glis1	1.64167
Insyn2b	1.70716e-43	7.15075	0.47	0.323	5.71932e-39	0	Insyn2b	1.45511
Dnajc21	2.34337e-43	1.11399	0.521	0.375	7.85074e-39	0	Dnajc21	1.38933
Dgat2	1.18181e-42	0.576794	0.408	0.266	3.95929e-38	0	Dgat2	1.53383
Brinp3	1.5371e-42	24.7759	0.974	0.845	5.1496e-38	0	Brinp3	1.15266
Gm27153	1.54049e-42	2.06026	0.47	0.321	5.16094e-38	0	Gm27153	1.46417
Dclk3	2.92616e-42	0.717645	0.406	0.261	9.80322e-38	0	Dclk3	1.55556
5830444B04Rik	1.09679e-41	0.611441	0.263	0.145	3.67447e-37	0	5830444B04Rik	1.81379
Rcan2	1.88084e-41	0.647371	0.937	0.85	6.3012e-37	0	Rcan2	1.10235
Myo1e	3.90522e-41	2.60876	0.361	0.223	1.30833e-36	0	Myo1e	1.61883
Rph3al	5.32715e-41	0.668188	0.377	0.238	1.7847e-36	0	Rph3al	1.58403
Sqle	2.55787e-40	0.831625	0.606	0.46	8.56936e-36	0	Sqle	1.31739
Snx9	3.76078e-40	2.02015	0.597	0.453	1.25994e-35	0	Snx9	1.31788
Flrt1	6.08056e-40	1.19558	0.547	0.4	2.03711e-35	0	Flrt1	1.3675
Stox1	6.32102e-40	3.00355	0.432	0.295	2.11767e-35	0	Stox1	1.46441
Ldlr	9.9753e-40	24.1681	0.597	0.451	3.34192e-35	0	Ldlr	1.32373
Gm42948	1.038e-39	1.00193	0.387	0.252	3.47751e-35	0	Gm42948	1.53571
Nectin1	3.49046e-39	0.519802	0.288	0.168	1.16937e-34	0	Nectin1	1.71429
Dpysl5	1.2225e-38	1.19135	0.809	0.687	4.09561e-34	0	Dpysl5	1.17758
Gm44643	4.30251e-37	0.821385	0.497	0.358	1.44143e-32	0	Gm44643	1.38827
BC028471	5.91648e-37	0.520011	0.225	0.12	1.98214e-32	0	BC028471	1.875
Nsf	6.3342e-37	4.11297	0.968	0.912	2.12208e-32	0	Nsf	1.0614
Galnt16	2.26718e-36	3.25144	0.712	0.582	7.59551e-32	0	Galnt16	1.22337
Arhgap17	8.22247e-36	0.51967	0.661	0.532	2.75469e-31	0	Arhgap17	1.24248
Greb1l	3.46083e-35	8.35705	0.246	0.376	1.15945e-30	0	Greb1l	0.654255
Prrg1	1.39837e-34	2.44616	0.287	0.172	4.68483e-30	0	Prrg1	1.6686
Tns3	3.25459e-34	0.55212	0.213	0.115	1.09035e-29	0	Tns3	1.85217
Gm19303	3.53513e-34	4.55709	0.448	0.306	1.18434e-29	0	Gm19303	1.46405
Idh2	1.53464e-33	0.989658	0.501	0.374	5.14136e-29	0	Idh2	1.33957
Fam210b	5.99693e-33	0.670639	0.365	0.244	2.00909e-28	0	Fam210b	1.4959
Gm48321	8.99854e-32	6.02069	0.52	0.384	3.01469e-27	0	Gm48321	1.35417
Unc5c	1.69407e-31	56.447	0.996	0.898	5.67546e-27	0	Unc5c	1.10913
Pcmtd2	2.21756e-31	0.907303	0.715	0.595	7.42927e-27	0	Pcmtd2	1.20168
Gm45645	3.38003e-31	1.59284	0.459	0.335	1.13238e-26	0	Gm45645	1.37015
Dpy19l3	3.82859e-31	0.844157	0.508	0.38	1.28265e-26	0	Dpy19l3	1.33684
Znrf3	2.53928e-30	1.12433	0.71	0.595	8.50711e-26	0	Znrf3	1.19328
Gnaq	1.08916e-29	1.15982	0.899	0.809	3.64891e-25	0	Gnaq	1.11125
Lrrc1	2.56653e-29	0.610303	0.5	0.374	8.59838e-25	0	Lrrc1	1.3369
Galnt11	2.92929e-29	1.17935	0.681	0.568	9.81372e-25	0	Galnt11	1.19894
Chst10	4.30299e-29	0.944916	0.566	0.446	1.44159e-24	0	Chst10	1.26906
Pgm2l1	6.05178e-29	1.17312	0.701	0.587	2.02747e-24	0	Pgm2l1	1.19421
Exoc6	9.67735e-29	0.657441	0.663	0.544	3.24211e-24	0	Exoc6	1.21875
Sesn3	2.81138e-28	0.724834	0.694	0.575	9.41869e-24	0	Sesn3	1.20696
Cbln4	3.02326e-28	5.2563	0.232	0.138	1.01285e-23	0	Cbln4	1.68116
Scn3b	5.50502e-28	0.591688	0.627	0.515	1.84429e-23	0	Scn3b	1.21748
Herc3	1.95874e-27	3.26304	0.655	0.528	6.56218e-23	0	Herc3	1.24053
Tiparp	2.00193e-27	2.91083	0.446	0.328	6.70685e-23	0	Tiparp	1.35976
4833422C13Rik	3.07706e-27	0.785614	0.343	0.233	1.03088e-22	0	4833422C13Rik	1.4721
Fdft1	4.30901e-27	1.60871	0.573	0.454	1.4436e-22	0	Fdft1	1.26211
Ankrd46	4.42458e-27	0.517887	0.323	0.219	1.48232e-22	0	Ankrd46	1.47489
Gm13584	1.69727e-26	0.517785	0.209	0.122	5.6862e-22	0	Gm13584	1.71311
Diaph2	1.75572e-26	2.38284	0.596	0.669	5.88203e-22	0	Diaph2	0.890882
Gckr	2.01927e-26	0.593106	0.303	0.198	6.76496e-22	0	Gckr	1.5303
Klf8	5.60464e-26	2.42221	0.632	0.515	1.87767e-21	0	Klf8	1.22718
Gabrg2	7.43436e-26	1.8223	0.839	0.75	2.49066e-21	0	Gabrg2	1.11867
Peli1	7.98038e-26	6.4287	0.585	0.473	2.67359e-21	0	Peli1	1.23679
Lclat1	3.44552e-25	0.845458	0.549	0.438	1.15432e-20	0	Lclat1	1.25342
1500035N22Rik	3.87698e-25	0.688383	0.28	0.183	1.29887e-20	0	1500035N22Rik	1.53005
Dnah7b	9.14174e-25	7.74508	0.486	0.368	3.06267e-20	0	Dnah7b	1.32065
Cstf2	2.06808e-24	0.709694	0.587	0.475	6.92847e-20	0	Cstf2	1.23579
Pde4a	4.22346e-24	3.54632	0.603	0.492	1.41494e-19	0	Pde4a	1.22561
Ap2a2	6.45929e-24	2.81662	0.807	0.714	2.16399e-19	0	Ap2a2	1.13025
Insig2	7.35337e-24	0.664631	0.52	0.416	2.46352e-19	0	Insig2	1.25
Cask	1.12077e-23	1.22776	0.904	0.832	3.75481e-19	0	Cask	1.08654
Hsd17b7	2.78686e-23	0.65588	0.321	0.223	9.33655e-19	0	Hsd17b7	1.43946
Gm20275	3.21095e-23	2.89112	0.842	0.772	1.07573e-18	0	Gm20275	1.09067
Gm50214	4.03528e-23	0.587888	0.148	0.08	1.3519e-18	0	Gm50214	1.85
Synrg	6.20353e-23	4.05618	0.688	0.587	2.07831e-18	0	Synrg	1.17206
Ldlrad3	8.00344e-23	4.46214	0.433	0.328	2.68131e-18	0	Ldlrad3	1.32012
Spats2l	1.07538e-22	2.57271	0.59	0.474	3.60273e-18	0	Spats2l	1.24473
Ubap2	1.23897e-22	1.30072	0.644	0.541	4.15078e-18	0	Ubap2	1.19039
Gm28750	1.90944e-22	2.47948	0.472	0.362	6.397e-18	0	Gm28750	1.30387
Rsu1	2.23227e-22	1.97866	0.582	0.474	7.47856e-18	0	Rsu1	1.22785
Cobll1	3.7874e-22	1.70889	0.172	0.098	1.26886e-17	0	Cobll1	1.7551
Gpm6a	5.4484e-22	1.2187	0.981	0.96	1.82532e-17	0	Gpm6a	1.02188
Adamts10	8.53974e-22	0.583268	0.331	0.235	2.86098e-17	0	Adamts10	1.40851
5730419F03Rik	1.0469e-21	0.812097	0.187	0.111	3.50731e-17	0	5730419F03Rik	1.68468
Rogdi	1.41297e-20	1.32964	0.5	0.398	4.73374e-16	0	Rogdi	1.25628
Mpzl1	1.44951e-20	1.60567	0.46	0.356	4.85615e-16	0	Mpzl1	1.29213
Gm48239	2.47705e-20	0.571205	0.302	0.212	8.2986e-16	0	Gm48239	1.42453
3110021N24Rik	2.63501e-20	33.3393	0.775	0.699	8.82782e-16	0	3110021N24Rik	1.10873
Epb41	3.26873e-20	4.9608	0.618	0.508	1.09509e-15	0	Epb41	1.21654
Tmem132c	4.47242e-20	1.23594	0.652	0.507	1.49835e-15	0	Tmem132c	1.286
Abat	8.63625e-20	0.638555	0.661	0.568	2.89332e-15	0	Abat	1.16373
Mir124-2hg	1.06716e-19	1.22974	0.848	0.765	3.5752e-15	0	Mir124-2hg	1.1085
Abca3	1.47438e-19	0.572021	0.73	0.638	4.93946e-15	0	Abca3	1.1442
Elovl6	1.81213e-19	3.29442	0.719	0.63	6.07099e-15	0	Elovl6	1.14127
Podxl2	5.08804e-19	1.31071	0.733	0.663	1.70459e-14	0	Podxl2	1.10558
Lin9	5.77833e-19	0.639368	0.265	0.183	1.93586e-14	0	Lin9	1.44809
Arl6ip1	7.91706e-19	1.51971	0.781	0.727	2.65237e-14	0	Arl6ip1	1.07428
Tacc2	1.04355e-18	5.28865	0.511	0.411	3.49609e-14	0	Tacc2	1.24331
Flt3	1.13323e-18	0.590024	0.463	0.356	3.79655e-14	0	Flt3	1.30056
Spire1	1.23005e-18	2.83381	0.831	0.756	4.12093e-14	0	Spire1	1.09921
Stx3	6.38999e-18	0.518975	0.614	0.521	2.14078e-13	0	Stx3	1.1785
Prtg	7.00186e-18	0.797862	0.172	0.106	2.34576e-13	0	Prtg	1.62264
Grb14	8.84047e-18	10.0721	0.662	0.569	2.96173e-13	0	Grb14	1.16344
Kansl1	1.07124e-17	1.69511	0.957	0.928	3.58886e-13	0	Kansl1	1.03125
Gm10125	2.0221e-17	9.23348	0.513	0.416	6.77444e-13	0	Gm10125	1.23317
Tcf7l2	2.22554e-17	3.08563	0.989	0.948	7.45602e-13	0	Tcf7l2	1.04325
Rit2	2.84733e-17	4.34801	0.95	0.91	9.53911e-13	0	Rit2	1.04396
Clcn5	3.18452e-17	0.581385	0.397	0.308	1.06688e-12	0	Clcn5	1.28896
Ankrd28	4.80839e-17	0.884716	0.691	0.609	1.61091e-12	0	Ankrd28	1.13465
Gm43915	8.0162e-17	1.33676	0.419	0.326	2.68559e-12	0	Gm43915	1.28528
Cpeb2	8.12918e-17	0.681244	0.711	0.632	2.72344e-12	0	Cpeb2	1.125
Myo9a	1.53393e-16	1.46368	0.933	0.885	5.13896e-12	0	Myo9a	1.05424
Gm32250	2.29068e-16	1.37576	0.68	0.599	7.67423e-12	0	Gm32250	1.13523
Lca5	2.69454e-16	0.731655	0.521	0.427	9.02724e-12	0	Lca5	1.22014
Phyhd1	4.72922e-16	0.540575	0.211	0.141	1.58438e-11	0	Phyhd1	1.49645
Pkig	5.198e-16	1.03467	0.443	0.356	1.74143e-11	0	Pkig	1.24438
Fam120a	9.45571e-16	1.13953	0.692	0.605	3.16785e-11	0	Fam120a	1.1438
Myo18a	1.05394e-15	8.72626	0.752	0.665	3.53093e-11	0	Myo18a	1.13083
Hdac8	1.88837e-15	5.51436	0.839	0.769	6.32641e-11	0	Hdac8	1.09103
Arhgap20	2.8727e-15	3.68044	0.439	0.352	9.62413e-11	0	Arhgap20	1.24716
Cers6	3.91204e-15	11.5758	0.764	0.668	1.31061e-10	0	Cers6	1.14371
Adam19	4.1942e-15	1.53672	0.406	0.322	1.40514e-10	0	Adam19	1.26087
Zdbf2	4.86012e-15	4.57766	0.605	0.517	1.62824e-10	0	Zdbf2	1.17021
Mgat5b	6.44547e-15	2.41757	0.739	0.632	2.15936e-10	0	Mgat5b	1.1693
Adcy10	7.30822e-15	0.512266	0.273	0.2	2.4484e-10	0	Adcy10	1.365
Acaca	9.1712e-15	1.36044	0.902	0.845	3.07254e-10	0	Acaca	1.06746
Gm37768	1.1472e-14	1.44963	0.371	0.288	3.84334e-10	0	Gm37768	1.28819
Zfhx4	1.23703e-14	8.13327	0.672	0.599	4.1443e-10	0	Zfhx4	1.12187
Stim2	1.30221e-14	1.08427	0.602	0.513	4.36265e-10	0	Stim2	1.17349
Acsl4	1.369e-14	1.26489	0.65	0.566	4.58643e-10	0	Acsl4	1.14841
Gm44644	1.45238e-14	1.11473	0.363	0.285	4.86575e-10	0	Gm44644	1.27368
Gm2087	1.48667e-14	1.33518	0.349	0.268	4.98063e-10	0	Gm2087	1.30224
Sfmbt1	2.01559e-14	2.09188	0.638	0.549	6.75265e-10	0	Sfmbt1	1.16211
Ube2e2	2.45813e-14	2.12206	0.965	0.924	8.23523e-10	0	Ube2e2	1.04437
Gm10785	2.83571e-14	1.87419	0.624	0.544	9.50019e-10	0	Gm10785	1.14706
Slc16a7	3.35791e-14	1.38035	0.678	0.598	1.12497e-09	0	Slc16a7	1.13378
Syngr1	3.6719e-14	0.78053	0.625	0.547	1.23016e-09	0	Syngr1	1.1426
Map4k3	8.49977e-14	1.76308	0.68	0.596	2.84759e-09	0	Map4k3	1.14094
Herc2	9.07876e-14	11.6157	0.865	0.818	3.04157e-09	0	Herc2	1.05746
Ankrd35	1.17017e-13	1.0424	0.175	0.116	3.9203e-09	0	Ankrd35	1.50862
Begain	1.42978e-13	0.52594	0.415	0.335	4.79005e-09	0	Begain	1.23881
Ptbp2	1.44267e-13	1.65513	0.801	0.74	4.83323e-09	0	Ptbp2	1.08243
Maco1	2.50146e-13	0.724026	0.582	0.501	8.38041e-09	0	Maco1	1.16168
Scpep1	2.85715e-13	0.519232	0.294	0.222	9.57203e-09	0	Scpep1	1.32432
Nnat	3.09268e-13	6.02264	0.457	0.513	1.03611e-08	0	Nnat	0.890838
Fbxo42	3.13013e-13	1.46463	0.566	0.482	1.04866e-08	0	Fbxo42	1.17427
Gm14858	3.37852e-13	0.541347	0.346	0.27	1.13187e-08	0	Gm14858	1.28148
Cpeb1	4.26046e-13	6.47234	0.725	0.637	1.42734e-08	0	Cpeb1	1.13815
2023-03-08	5.35474e-13	0.854949	0.43	0.356	1.79394e-08	0	2023-03-08	1.20787
Mapk8	5.48954e-13	0.703938	0.814	0.736	1.83911e-08	0	Mapk8	1.10598
N4bp2	5.93279e-13	1.45766	0.407	0.328	1.9876e-08	0	N4bp2	1.24085
Ccser2	7.82548e-13	1.14979	0.643	0.563	2.62169e-08	0	Ccser2	1.1421
Klhl10	8.01416e-13	0.582733	0.331	0.258	2.68491e-08	0	Klhl10	1.28295
Rab11fip4	1.02566e-12	0.511256	0.625	0.543	3.43618e-08	0	Rab11fip4	1.15101
Ptpn12	2.0443e-12	1.09392	0.668	0.592	6.84882e-08	0	Ptpn12	1.12838
Nipbl	2.46163e-12	4.30444	0.844	0.783	8.24694e-08	0	Nipbl	1.07791
Gm7854	2.58477e-12	4.13118	0.51	0.428	8.6595e-08	0	Gm7854	1.19159
Ranbp9	2.84384e-12	3.59665	0.728	0.657	9.52742e-08	0	Ranbp9	1.10807
Map6	3.32769e-12	7.4222	0.815	0.739	1.11484e-07	0	Map6	1.10284
Gm38604	4.87906e-12	0.801781	0.429	0.352	1.63458e-07	0	Gm38604	1.21875
Parva	5.0448e-12	2.15206	0.123	0.077	1.69011e-07	0	Parva	1.5974
Lrrfip2	5.35839e-12	1.42649	0.682	0.599	1.79517e-07	0	Lrrfip2	1.13856
Dync1h1	5.94424e-12	3.941	0.852	0.792	1.99144e-07	0	Dync1h1	1.07576
1810034E14Rik	6.8253e-12	2.33619	0.499	0.425	2.28661e-07	0	1810034E14Rik	1.17412
Gm12394	1.16899e-11	0.689003	0.251	0.189	3.91635e-07	0	Gm12394	1.32804
Senp7	1.35435e-11	2.60342	0.816	0.743	4.53736e-07	0	Senp7	1.09825
Eif2ak3	1.50508e-11	0.755209	0.373	0.298	5.04232e-07	0	Eif2ak3	1.25168
Atf7	1.8472e-11	1.66799	0.48	0.398	6.1885e-07	0	Atf7	1.20603
Sec24a	1.96925e-11	0.536638	0.648	0.584	6.5974e-07	0	Sec24a	1.10959
Gm17106	1.97106e-11	0.637297	0.489	0.412	6.60344e-07	0	Gm17106	1.18689
Gm27032	2.33314e-11	1.41187	0.41	0.339	7.81649e-07	0	Gm27032	1.20944
Uck2	2.72093e-11	0.831963	0.415	0.344	9.11565e-07	0	Uck2	1.2064
Gns	2.96349e-11	0.682202	0.55	0.483	9.92829e-07	0	Gns	1.13872
Zfp292	4.56466e-11	0.62471	0.759	0.708	1.52925e-06	0	Zfp292	1.07203
Gm29088	5.23071e-11	1.29708	0.143	0.095	1.75239e-06	0	Gm29088	1.50526
Vezt	6.08332e-11	1.42993	0.828	0.772	2.03803e-06	0	Vezt	1.07254
Rsf1os1	8.90851e-11	0.666088	0.423	0.351	2.98453e-06	0	Rsf1os1	1.20513
Gm20658	1.34197e-10	2.94832	0.255	0.194	4.49586e-06	0	Gm20658	1.31443
Zfp318	1.96079e-10	0.945965	0.506	0.434	6.56905e-06	0	Zfp318	1.1659
Alpk1	3.21233e-10	0.651652	0.175	0.123	1.07619e-05	0	Alpk1	1.42276
Fam120b	3.24043e-10	1.50876	0.693	0.623	1.08561e-05	0	Fam120b	1.11236
Ago2	3.27181e-10	0.687642	0.632	0.561	1.09612e-05	0	Ago2	1.12656
Vps13c	3.82059e-10	8.63506	0.795	0.728	1.27997e-05	0	Vps13c	1.09203
Mpc1	3.93219e-10	2.74845	0.755	0.694	1.31736e-05	0	Mpc1	1.0879
Usp50	3.94807e-10	4.34119	0.587	0.526	1.32268e-05	0	Usp50	1.11597
Map7	6.09559e-10	10.6593	0.696	0.62	2.04214e-05	0	Map7	1.12258
Gm19710	8.07302e-10	2.77774	0.606	0.544	2.70462e-05	0	Gm19710	1.11397
Hivep1	8.60474e-10	0.664854	0.515	0.443	2.88276e-05	0	Hivep1	1.16253
Aim2	8.79687e-10	0.525397	0.29	0.231	2.94713e-05	0	Aim2	1.25541
Ahcyl1	8.82293e-10	0.975374	0.719	0.651	2.95586e-05	0	Ahcyl1	1.10445
Rnf38	1.0094e-09	0.607393	0.571	0.499	3.38169e-05	0	Rnf38	1.14429
Dusp14	1.94859e-09	0.617346	0.245	0.188	6.52818e-05	0	Dusp14	1.30319
Rab40c	2.10467e-09	4.31427	0.666	0.589	7.05106e-05	0	Rab40c	1.13073
Arhgap23	2.11074e-09	0.791892	0.576	0.506	7.07142e-05	0	Arhgap23	1.13834
Ube3c	2.27078e-09	5.21212	0.848	0.789	7.60757e-05	0	Ube3c	1.07478
Syn3	2.72033e-09	3.13648	0.809	0.747	9.11365e-05	0	Syn3	1.083
Cdkal1	2.81994e-09	4.61266	0.782	0.727	9.44737e-05	0	Cdkal1	1.07565
Nek7	3.78182e-09	3.2644	0.747	0.672	0.000126698	0	Nek7	1.11161
Npc1	3.85348e-09	1.13611	0.506	0.439	0.000129099	0	Npc1	1.15262
Sik2	3.93779e-09	2.50875	0.65	0.594	0.000131924	0	Sik2	1.09428
Gm48765	4.03545e-09	2.06717	0.409	0.345	0.000135196	0	Gm48765	1.18551
Efcab1	4.61399e-09	6.67424	0.499	0.423	0.000154578	0	Efcab1	1.17967
Eif4e3	5.08314e-09	0.571644	0.303	0.243	0.000170295	0	Eif4e3	1.24691
Itsn2	5.62266e-09	1.14568	0.654	0.587	0.000188371	0	Itsn2	1.11414
Btaf1	6.47934e-09	2.60438	0.703	0.636	0.000217071	0	Btaf1	1.10535
C2cd2	7.99979e-09	2.18042	0.493	0.428	0.000268009	0	C2cd2	1.15187
Eif4g3	8.15828e-09	2.44216	0.905	0.861	0.000273319	0	Eif4g3	1.0511
Npas4	1.03107e-08	6.69484	0.158	0.116	0.000345431	0	Npas4	1.36207
Gm14508	1.10453e-08	1.66731	0.199	0.15	0.000370038	0	Gm14508	1.32667
Wdr78	1.28589e-08	0.679615	0.433	0.369	0.000430798	0	Wdr78	1.17344
Vps54	1.37923e-08	0.889534	0.637	0.572	0.00046207	0	Vps54	1.11364
Gm47423	1.65286e-08	11.3847	0.34	0.284	0.000553741	0	Gm47423	1.19718
Nudt5	1.85781e-08	0.835788	0.44	0.378	0.000622403	0	Nudt5	1.16402
Rbm4b	1.95107e-08	1.3972	0.659	0.609	0.000653647	0	Rbm4b	1.0821
Irs2	2.53507e-08	1.09388	0.346	0.291	0.000849298	0	Irs2	1.189
Agps	3.26533e-08	0.691554	0.534	0.475	0.00109395	0	Agps	1.12421
Fam135a	3.59841e-08	9.7798	0.68	0.626	0.00120554	0	Fam135a	1.08626
Myo6	4.56917e-08	1.17429	0.592	0.522	0.00153076	0	Myo6	1.1341
Sos1	5.59346e-08	0.967356	0.677	0.627	0.00187392	0	Sos1	1.07974
Ulk2	6.97218e-08	0.955574	0.825	0.785	0.00233582	0	Ulk2	1.05096
Minpp1	7.02802e-08	0.70196	0.4	0.34	0.00235453	0	Minpp1	1.17647
Tent4b	7.1687e-08	2.78671	0.454	0.388	0.00240166	0	Tent4b	1.1701
Mlxip	7.81802e-08	1.5753	0.437	0.376	0.00261919	0	Mlxip	1.16223
Brwd3	8.329e-08	0.505848	0.458	0.399	0.00279038	0	Brwd3	1.14787
Xpo4	8.43855e-08	0.612112	0.505	0.445	0.00282708	0	Xpo4	1.13483
Clasrp	8.61448e-08	0.555802	0.482	0.426	0.00288602	0	Clasrp	1.13146
Pcsk1	9.66261e-08	3.10187	0.081	0.121	0.00323717	0	Pcsk1	0.669421
Gm28375	9.94817e-08	2.11846	0.505	0.449	0.00333284	0	Gm28375	1.12472
Sae1	1.10625e-07	1.1278	0.435	0.373	0.00370616	0	Sae1	1.16622
Paip2	1.22991e-07	1.93487	0.744	0.694	0.00412046	0	Paip2	1.07205
Fam117b	1.31033e-07	5.39761	0.635	0.591	0.00438987	0	Fam117b	1.07445
Abi1	1.63515e-07	0.826898	0.648	0.591	0.00547808	0	Abi1	1.09645
Alg9	1.66173e-07	1.17977	0.407	0.353	0.00556712	0	Alg9	1.15297
Zranb3	1.94513e-07	1.28818	0.266	0.214	0.00651657	0	Zranb3	1.24299
Jdp2	2.10647e-07	5.0683	0.421	0.365	0.00705708	0	Jdp2	1.15342
Dcx	2.63118e-07	3.08445	0.62	0.552	0.00881497	0	Dcx	1.12319
Tmem87b	2.96614e-07	0.974445	0.513	0.468	0.00993718	0	Tmem87b	1.09615
Cables1	3.16381e-07	14.1421	0.5	0.433	0.0105994	0	Cables1	1.15473
6030443J06Rik	3.78643e-07	2.06167	0.406	0.349	0.0126853	0	6030443J06Rik	1.16332
Drg1	3.88303e-07	0.911577	0.751	0.697	0.0130089	0	Drg1	1.07747
Tgfb2	4.04371e-07	0.715877	0.212	0.261	0.0135472	0	Tgfb2	0.812261
Rubcn	5.20348e-07	0.53269	0.516	0.464	0.0174327	0	Rubcn	1.11207
Senp2	5.32843e-07	10.0545	0.627	0.559	0.0178513	0	Senp2	1.12165
Eps8	5.43295e-07	1.68817	0.703	0.622	0.0182015	0	Eps8	1.13023
Bhlhe40	7.2272e-07	2.66829	0.191	0.149	0.0242126	0	Bhlhe40	1.28188
Sh3pxd2a	7.51249e-07	0.580324	0.473	0.413	0.0251683	0	Sh3pxd2a	1.14528
Tsc22d2	7.51291e-07	1.16553	0.59	0.538	0.0251697	0	Tsc22d2	1.09665
Rxfp1	8.58203e-07	2.44591	0.068	0.101	0.0287515	0	Rxfp1	0.673267
4930488L21Rik	9.07972e-07	1.45003	0.389	0.335	0.0304189	0	4930488L21Rik	1.16119
Arih1	9.44426e-07	3.80849	0.895	0.856	0.0316401	0	Arih1	1.04556
Hfm1	1.02542e-06	1.00604	0.283	0.232	0.0343537	0	Hfm1	1.21983
Hdac1	1.10981e-06	0.739416	0.33	0.279	0.0371809	0	Hdac1	1.1828
Ppp3cc	1.19894e-06	1.68052	0.567	0.507	0.0401671	0	Ppp3cc	1.11834
Mospd2	1.24653e-06	0.679653	0.339	0.287	0.0417613	0	Mospd2	1.18118
Adarb2	0	378.334	0.928	0.264	0	1	Adarb2	3.51515
Il1rapl1	0	107.563	0.995	0.92	0	1	Il1rapl1	1.08152
Stox2	0	93.1324	0.974	0.854	0	1	Stox2	1.14052
Zfp804b	0	92.6804	0.986	0.767	0	1	Zfp804b	1.28553
Fras1	0	68.3553	0.487	0.104	0	1	Fras1	4.68269
Atp2b1	0	60.3932	0.99	0.891	0	1	Atp2b1	1.11111
Cdh4	0	59.9469	0.904	0.522	0	1	Cdh4	1.7318
Kcnc2	0	52.7369	0.995	0.882	0	1	Kcnc2	1.12812
Ryr3	0	51.293	0.898	0.572	0	1	Ryr3	1.56993
Chrm3	0	49.8466	0.935	0.523	0	1	Chrm3	1.78776
Cacna2d3	0	48.3732	0.991	0.78	0	1	Cacna2d3	1.27051
Grm1	0	46.5143	0.997	0.762	0	1	Grm1	1.3084
C6	0	44.0692	0.385	0.024	0	1	C6	16.0417
Adarb1	0	44.0134	0.963	0.779	0	1	Adarb1	1.2362
Shisa6	0	40.1795	0.569	0.165	0	1	Shisa6	3.44848
Fign	0	36.7369	0.944	0.284	0	1	Fign	3.32394
Hs3st5	0	35.0293	0.775	0.316	0	1	Hs3st5	2.45253
Synpo2	0	29.654	0.984	0.745	0	1	Synpo2	1.32081
Cnksr3	0	24.7223	0.547	0.137	0	1	Cnksr3	3.9927
Rnf152	0	24.4065	0.613	0.161	0	1	Rnf152	3.80745
Tspear	0	23.8065	0.599	0.08	0	1	Tspear	7.4875
Tanc1	0	22.2116	0.937	0.472	0	1	Tanc1	1.98517
Il1rap	0	21.9227	0.902	0.6	0	1	Il1rap	1.50333
Lef1	0	20.0157	0.757	0.361	0	1	Lef1	2.09695
Sema6a	0	19.4417	0.785	0.228	0	1	Sema6a	3.44298
9330185C12Rik	0	19.4335	0.569	0.075	0	1	9330185C12Rik	7.58667
Myo1b	0	19.0805	0.745	0.173	0	1	Myo1b	4.30636
Kcnip3	0	19.0755	0.737	0.265	0	1	Kcnip3	2.78113
Pex5l	0	18.5386	0.877	0.49	0	1	Pex5l	1.7898
Atp2b2	0	18.11	0.951	0.717	0	1	Atp2b2	1.32636
Tmem108	0	16.8644	0.901	0.475	0	1	Tmem108	1.89684
Samd5	0	16.6435	0.941	0.638	0	1	Samd5	1.47492
Tmem232	0	15.4873	0.446	0.097	0	1	Tmem232	4.59794
Prkcd	0	15.4494	0.681	0.092	0	1	Prkcd	7.40217
Fbn2	0	13.976	0.578	0.129	0	1	Fbn2	4.48062
Slc24a3	0	13.3322	0.967	0.753	0	1	Slc24a3	1.2842
Mb21d2	0	13.2374	0.782	0.309	0	1	Mb21d2	2.53074
Kcnab1	0	11.3507	0.929	0.571	0	1	Kcnab1	1.62697
Plekhg1	0	10.8955	0.903	0.31	0	1	Plekhg1	2.9129
Atp2a2	0	10.8809	0.981	0.872	0	1	Atp2a2	1.125
Ptk2b	0	10.4281	0.601	0.106	0	1	Ptk2b	5.66981
Gm46102	0	9.91703	0.498	0.084	0	1	Gm46102	5.92857
Clstn2	0	9.01695	0.962	0.597	0	1	Clstn2	1.61139
Grin2a	0	8.19771	0.99	0.916	0	1	Grin2a	1.08079
Etl4	0	8.01343	0.958	0.447	0	1	Etl4	2.14318
Rassf3	0	7.02388	0.59	0.165	0	1	Rassf3	3.57576
Ano4	0	6.57761	0.819	0.432	0	1	Ano4	1.89583
Grin2c	0	6.51496	0.394	0.034	0	1	Grin2c	11.5882
Bmp6	0	6.33434	0.491	0.073	0	1	Bmp6	6.72603
Gm35696	0	6.08261	0.329	0.037	0	1	Gm35696	8.89189
Zdhhc22	0	5.92395	0.695	0.255	0	1	Zdhhc22	2.72549
Cdh11	0	5.72385	0.908	0.526	0	1	Cdh11	1.72624
Mrvi1	0	5.59056	0.681	0.121	0	1	Mrvi1	5.6281
Eln	0	5.23381	0.32	0.039	0	1	Eln	8.20513
Col26a1	0	4.08642	0.733	0.165	0	1	Col26a1	4.44242
Mctp2	0	2.58226	0.642	0.154	0	1	Mctp2	4.16883
Prkg2	0	1.14279	0.731	0.222	0	1	Prkg2	3.29279
Lrrc7	0	0.799971	0.999	0.987	0	1	Lrrc7	1.01216
Arap2	7.33451e-307	6.68654	0.51	0.135	2.45721e-302	1	Arap2	3.77778
Shroom4	4.12472e-306	2.0962	0.452	0.098	1.38186e-301	1	Shroom4	4.61224
Clmn	2.55818e-304	21.6077	0.942	0.666	8.57042e-300	1	Clmn	1.41441
Ptprj	3.55589e-302	16.401	0.904	0.672	1.1913e-297	1	Ptprj	1.34524
Zfp385b	2.52997e-300	9.47197	0.821	0.422	8.47591e-296	1	Zfp385b	1.9455
Atxn1	2.19165e-298	25.4405	0.995	0.959	7.34248e-294	1	Atxn1	1.03754
Ptpn4	1.04544e-296	18.1123	0.981	0.855	3.50243e-292	1	Ptpn4	1.14737
Grin2b	1.7248e-295	72.9347	0.997	0.925	5.77842e-291	1	Grin2b	1.07784
Adgrb1	5.95578e-295	22.9523	0.885	0.596	1.99531e-290	1	Adgrb1	1.4849
B3glct	3.77827e-294	3.38649	0.716	0.306	1.2658e-289	1	B3glct	2.33987
Anks1b	1.35099e-293	29.6539	0.999	0.991	4.52609e-289	1	Anks1b	1.00807
Sh3d19	2.39408e-289	29.2477	0.951	0.758	8.02063e-285	1	Sh3d19	1.25462
Epha7	7.29626e-287	9.65534	0.868	0.499	2.44439e-282	1	Epha7	1.73948
Dagla	1.32257e-286	4.77958	0.74	0.36	4.43086e-282	1	Dagla	2.05556
Raver2	8.40935e-284	5.13769	0.591	0.206	2.8173e-279	1	Raver2	2.86893
Ccdc136	7.60789e-276	1.83916	0.967	0.761	2.54879e-271	1	Ccdc136	1.2707
Rcsd1	1.79666e-273	1.90814	0.313	0.047	6.01915e-269	1	Rcsd1	6.65957
Fam20c	8.41422e-271	4.38022	0.632	0.245	2.81893e-266	1	Fam20c	2.57959
Sash1	1.73252e-270	14.2604	0.808	0.445	5.80429e-266	1	Sash1	1.81573
Igsf21	2.72176e-267	14.9946	0.825	0.469	9.11842e-263	1	Igsf21	1.75906
Slc24a2	1.54025e-266	31.1019	0.923	0.692	5.16015e-262	1	Slc24a2	1.33382
Tafa2	2.74082e-266	44.0808	0.557	0.209	9.18231e-262	1	Tafa2	2.66507
Map3k5	5.39746e-266	4.02872	0.626	0.247	1.80826e-261	1	Map3k5	2.53441
Syt7	2.17341e-265	5.15068	0.981	0.862	7.28135e-261	1	Syt7	1.13805
Col16a1	8.68554e-265	7.38618	0.404	0.091	2.90983e-260	1	Col16a1	4.43956
Thsd4	3.8729e-259	41.1944	0.841	0.507	1.2975e-254	1	Thsd4	1.65878
Edil3	1.68274e-258	42.1153	0.928	0.694	5.63753e-254	1	Edil3	1.33718
B230334C09Rik	3.81475e-253	8.21157	0.885	0.616	1.27802e-248	1	B230334C09Rik	1.43669
Cacnb4	5.00214e-252	3.63411	0.986	0.858	1.67582e-247	1	Cacnb4	1.14918
Inpp5a	6.45873e-250	13.7839	0.932	0.701	2.1638e-245	1	Inpp5a	1.32953
Cacna1c	1.65309e-249	90.1329	0.996	0.977	5.53817e-245	1	Cacna1c	1.01945
Cit	2.19548e-248	31.0267	0.994	0.895	7.3553e-244	1	Cit	1.11061
Zmat4	3.45642e-244	7.02625	0.988	0.881	1.15797e-239	1	Zmat4	1.12145
Pkp2	6.57733e-244	7.55516	0.665	0.298	2.20354e-239	1	Pkp2	2.23154
Fbln5	5.95122e-241	1.98017	0.352	0.072	1.99378e-236	1	Fbln5	4.88889
Arsj	8.18147e-241	5.43803	0.52	0.168	2.74095e-236	1	Arsj	3.09524
Gabrd	1.02688e-239	9.2403	0.54	0.193	3.44025e-235	1	Gabrd	2.79793
Dlgap4	1.12147e-237	25.0578	0.915	0.694	3.75713e-233	1	Dlgap4	1.31844
Kalrn	5.28213e-236	32.4259	0.994	0.883	1.76962e-231	1	Kalrn	1.12571
Rxfp11	2.79735e-234	0.928837	0.299	0.05	9.37168e-230	1	Rxfp1	5.98
Dab2	1.08982e-233	2.18603	0.237	0.028	3.6511e-229	1	Dab2	8.46429
Grid2ip	1.43021e-233	5.94707	0.694	0.323	4.79149e-229	1	Grid2ip	2.14861
Khdrbs3	5.78062e-231	9.49407	0.922	0.686	1.93662e-226	1	Khdrbs3	1.34402
Opn3	8.70335e-231	1.09127	0.225	0.025	2.9158e-226	1	Opn3	9
Usp43	6.97902e-230	1.45105	0.324	0.062	2.33811e-225	1	Usp43	5.22581
Npas2	1.33338e-229	8.09496	0.873	0.576	4.46709e-225	1	Npas2	1.51562
Mgll	4.00732e-227	5.23237	0.739	0.383	1.34253e-222	1	Mgll	1.9295
Lhfp	5.87689e-227	8.02321	0.857	0.539	1.96887e-222	1	Lhfp	1.58998
Sorbs2	1.53256e-226	20.9975	0.982	0.903	5.13438e-222	1	Sorbs2	1.08749
Sh2d4b	3.2615e-226	3.83526	0.478	0.149	1.09267e-221	1	Sh2d4b	3.20805
Abhd12b	3.5629e-226	63.4909	0.296	0.055	1.19364e-221	1	Abhd12b	5.38182
Nin	6.08303e-224	9.18705	0.931	0.739	2.03794e-219	1	Nin	1.25981
Gm20752	6.16059e-224	21.4092	0.593	0.232	2.06392e-219	1	Gm20752	2.55603
Xylt2	2.31093e-222	3.71894	0.586	0.244	7.74206e-218	1	Xylt2	2.40164
Rapgef5	3.18972e-222	7.53775	0.821	0.473	1.06862e-217	1	Rapgef5	1.73573
Nell1	2.49406e-220	25.1395	0.991	0.843	8.3556e-216	1	Nell1	1.17556
Rab37	1.49481e-219	1.45279	0.337	0.072	5.00792e-215	1	Rab37	4.68056
9330175M20Rik	2.95633e-219	1.1405	0.253	0.036	9.9043e-215	1	9330175M20Rik	7.02778
Trim9	3.36802e-219	8.03685	0.933	0.746	1.12835e-214	1	Trim9	1.25067
Dgkh	1.09702e-217	11.2359	0.916	0.692	3.67523e-213	1	Dgkh	1.3237
Tspan5	5.48967e-216	7.03902	0.901	0.64	1.83915e-211	1	Tspan5	1.40781
Angpt1	1.51802e-211	6.4968	0.377	0.095	5.08566e-207	1	Angpt1	3.96842
Adgrl2	1.02559e-206	6.03642	0.795	0.457	3.43593e-202	1	Adgrl2	1.73961
Farp1	1.54905e-205	7.65397	0.944	0.797	5.18962e-201	1	Farp1	1.18444
Unc80	4.44895e-205	3.89195	0.991	0.929	1.49049e-200	1	Unc80	1.06674
Gm30003	4.83719e-205	3.33892	0.283	0.052	1.62055e-200	1	Gm30003	5.44231
Esyt2	1.78541e-201	1.3947	0.95	0.822	5.98147e-197	1	Esyt2	1.15572
Tll1	1.82691e-201	0.71487	0.637	0.283	6.12051e-197	1	Tll1	2.25088
Gpr158	2.10326e-198	11.7507	0.982	0.895	7.04633e-194	1	Gpr158	1.09721
Camk2a	6.71573e-198	14.1495	0.952	0.787	2.2499e-193	1	Camk2a	1.20966
Ramp3	7.59691e-197	2.87873	0.637	0.294	2.54512e-192	1	Ramp3	2.16667
Slc29a1	3.76273e-195	2.43061	0.685	0.359	1.26059e-190	1	Slc29a1	1.90808
Lrtm1	7.2217e-195	1.12578	0.527	0.203	2.41941e-190	1	Lrtm1	2.59606
Sestd1	7.95761e-190	4.23417	0.819	0.559	2.66596e-185	1	Sestd1	1.46512
Gm30382	8.52174e-190	6.86417	0.729	0.387	2.85495e-185	1	Gm30382	1.88372
Hrh2	8.07605e-189	2.99985	0.374	0.105	2.70564e-184	1	Hrh2	3.5619
Atp6ap1l	1.26009e-188	1.98504	0.141	0.008	4.22156e-184	1	Atp6ap1l	17.625
Endou	7.10881e-188	1.06364	0.239	0.039	2.38159e-183	1	Endou	6.12821
Sorbs1	6.25569e-186	18.0167	0.934	0.81	2.09578e-181	1	Sorbs1	1.15309
Grm5	9.703e-186	12.3413	0.994	0.927	3.2507e-181	1	Grm5	1.07228
Hs3st1	6.31348e-183	1.70816	0.261	0.05	2.11514e-178	1	Hs3st1	5.22
Ildr2	2.06797e-181	16.7375	0.957	0.784	6.9281e-177	1	Ildr2	1.22066
Cd47	2.58118e-181	4.03694	0.914	0.693	8.64748e-177	1	Cd47	1.3189
Clvs1	7.83724e-181	12.0738	0.854	0.63	2.62563e-176	1	Clvs1	1.35556
Osbpl1a	2.42742e-180	7.27734	0.841	0.594	8.13234e-176	1	Osbpl1a	1.41582
Kctd17	1.00726e-179	4.53645	0.617	0.307	3.37454e-175	1	Kctd17	2.00977
Fam19a2	2.49222e-179	35.4149	0.333	0.093	8.34943e-175	1	Fam19a2	3.58065
Vwc2	9.14779e-179	0.548385	0.932	0.727	3.06469e-174	1	Vwc2	1.28198
Efhd1	2.03067e-178	1.42012	0.148	0.011	6.80315e-174	1	Efhd1	13.4545
Dgki	3.03192e-178	17.5242	0.993	0.943	1.01575e-173	1	Dgki	1.05302
Pde4d	1.89724e-176	49.8516	0.995	0.991	6.35615e-172	1	Pde4d	1.00404
Secisbp2l	6.42691e-175	6.47773	0.663	0.358	2.15314e-170	1	Secisbp2l	1.85196
Ptch2	1.56152e-174	0.911681	0.225	0.037	5.23139e-170	1	Ptch2	6.08108
Diaph21	5.54531e-174	1.5402	0.852	0.609	1.85779e-169	1	Diaph2	1.39901
Pag1	1.77863e-173	2.53391	0.746	0.459	5.95876e-169	1	Pag1	1.62527
Iyd	1.80658e-172	0.741899	0.159	0.015	6.05241e-168	1	Iyd	10.6
Galnt18	2.0924e-172	6.36644	0.794	0.498	7.00994e-168	1	Galnt18	1.59438
Deptor	1.41409e-170	5.81652	0.654	0.336	4.7375e-166	1	Deptor	1.94643
Plekha51	6.15434e-169	2.79498	0.969	0.877	2.06183e-164	1	Plekha5	1.1049
Socs2	1.86539e-168	2.50411	0.601	0.282	6.24944e-164	1	Socs2	2.13121
Brinp2	1.05583e-167	8.11321	0.89	0.664	3.53725e-163	1	Brinp2	1.34036
Inpp4b	1.98832e-167	25.2996	0.997	0.953	6.66126e-163	1	Inpp4b	1.04617
Igf1r	1.25595e-166	5.19996	0.936	0.815	4.20769e-162	1	Igf1r	1.14847
Vgf	8.37906e-166	3.29387	0.58	0.261	2.80715e-161	1	Vgf	2.22222
Arhgap21	3.00857e-164	6.02986	0.849	0.62	1.00793e-159	1	Arhgap21	1.36935
Htr2c	7.80096e-164	31.07	0.898	0.676	2.61348e-159	1	Htr2c	1.3284
Ntng1	3.37582e-163	10.9689	1	0.932	1.13097e-158	1	Ntng1	1.07296
Tm6sf1	2.44236e-162	4.81269	0.631	0.321	8.18239e-158	1	Tm6sf1	1.96573
Cacna1a	3.02009e-162	23.881	0.986	0.876	1.01179e-157	1	Cacna1a	1.12557
Gabrb2	5.62072e-162	1.88612	0.962	0.804	1.88305e-157	1	Gabrb2	1.19652
Grm4	4.72679e-161	26.9689	0.809	0.516	1.58357e-156	1	Grm4	1.56783
Epha10	5.69047e-161	14.6913	0.787	0.516	1.90642e-156	1	Epha10	1.52519
Etv6	1.2291e-160	6.89035	0.604	0.299	4.11772e-156	1	Etv6	2.02007
Epb41l3	1.74478e-158	20.5004	0.952	0.86	5.84536e-154	1	Epb41l3	1.10698
Homer2	1.30947e-157	1.83843	0.648	0.353	4.38699e-153	1	Homer2	1.83569
Hspa12a	1.58521e-157	0.61689	0.721	0.451	5.31076e-153	1	Hspa12a	1.59867
Frmd4a	1.73301e-157	133.528	0.997	0.975	5.80592e-153	1	Frmd4a	1.02256
Adamts15	5.58206e-157	2.3048	0.32	0.09	1.8701e-152	1	Adamts15	3.55556
Adcy1	8.00083e-157	7.39993	0.662	0.362	2.68044e-152	1	Adcy1	1.82873
Phactr2	1.77905e-156	9.6236	0.9	0.686	5.96018e-152	1	Phactr2	1.31195
Akap13	1.22852e-155	7.48302	0.812	0.569	4.11578e-151	1	Akap13	1.42707
Sez6l	2.76396e-154	14.4241	0.87	0.633	9.25983e-150	1	Sez6l	1.37441
Mir9-3hg	3.78947e-154	1.9844	0.443	0.17	1.26955e-149	1	Mir9-3hg	2.60588
Cacng4	5.25431e-154	7.10072	0.738	0.453	1.7603e-149	1	Cacng4	1.62914
Snx29	9.15649e-154	25.3226	0.941	0.824	3.06761e-149	1	Snx29	1.14199
Dapk1	1.45377e-153	6.38741	0.832	0.61	4.87042e-149	1	Dapk1	1.36393
Prickle11	1.77115e-153	2.16121	0.968	0.822	5.93372e-149	1	Prickle1	1.17762
Fam189a2	1.8057e-153	2.54879	0.434	0.162	6.04946e-149	1	Fam189a2	2.67901
Adrb1	3.42504e-153	1.19222	0.273	0.065	1.14746e-148	1	Adrb1	4.2
Trio	2.99266e-152	3.68366	0.975	0.904	1.0026e-147	1	Trio	1.07854
Patj	3.84628e-152	22.8934	0.833	0.626	1.28858e-147	1	Patj	1.33067
Sv2b	4.34937e-152	7.75058	0.908	0.706	1.45713e-147	1	Sv2b	1.28612
Kcnmb4	1.92811e-151	2.88848	0.597	0.294	6.45954e-147	1	Kcnmb4	2.03061
Herc1	3.69894e-149	13.8305	0.964	0.908	1.23922e-144	1	Herc1	1.06167
Nrbp2	3.79153e-149	3.19207	0.779	0.53	1.27024e-144	1	Nrbp2	1.46981
Napepld	4.18628e-148	3.23046	0.478	0.202	1.40249e-143	1	Napepld	2.36634
Adgrf5	6.60967e-148	3.08167	0.11	0.006	2.21437e-143	1	Adgrf5	18.3333
Ctif	6.78079e-148	6.16219	0.947	0.826	2.2717e-143	1	Ctif	1.14649
Gtf2a1l	2.96979e-147	0.889089	0.163	0.021	9.94941e-143	1	Gtf2a1l	7.7619
Osbpl5	5.78056e-147	4.8224	0.489	0.213	1.9366e-142	1	Osbpl5	2.29577
Hivep3	6.83419e-147	27.2116	0.961	0.875	2.28959e-142	1	Hivep3	1.09829
Col25a1	1.06886e-146	78.586	0.847	0.609	3.58088e-142	1	Col25a1	1.3908
Myo5c	2.3483e-146	1.06707	0.175	0.026	7.86728e-142	1	Myo5c	6.73077
Necab1	3.27676e-146	5.20486	0.978	0.86	1.09778e-141	1	Necab1	1.13721
Lrrn2	1.8039e-145	12.8498	0.849	0.67	6.04342e-141	1	Lrrn2	1.26716
Fam110b	2.45439e-145	5.09507	0.812	0.563	8.22269e-141	1	Fam110b	1.44227
Ptpn5	2.70991e-144	6.77571	0.792	0.542	9.07873e-140	1	Ptpn5	1.46125
Sh3bgrl2	4.86414e-144	2.8202	0.664	0.372	1.62958e-139	1	Sh3bgrl2	1.78495
Kcnj9	5.02855e-144	4.93187	0.783	0.523	1.68467e-139	1	Kcnj9	1.49713
Gm17171	3.73972e-143	0.987681	0.237	0.052	1.25288e-138	1	Gm17171	4.55769
Fhdc1	1.36849e-142	0.966105	0.261	0.065	4.58472e-138	1	Fhdc1	4.01538
Ano6	3.41164e-141	4.67666	0.796	0.538	1.14297e-136	1	Ano6	1.47955
Arid5b	1.42772e-139	9.16058	0.931	0.754	4.78314e-135	1	Arid5b	1.23475
Eml1	1.73141e-138	8.68346	0.897	0.688	5.80058e-134	1	Eml1	1.30378
Camk2d	8.99316e-138	6.40636	0.974	0.92	3.01289e-133	1	Camk2d	1.0587
Frmpd4	1.50258e-137	12.3677	0.982	0.878	5.03394e-133	1	Frmpd4	1.11845
Pacsin2	8.62906e-137	6.83943	0.548	0.273	2.89091e-132	1	Pacsin2	2.00733
Inpp5j	4.14196e-136	3.06723	0.303	0.091	1.38764e-131	1	Inpp5j	3.32967
Stum	5.70208e-136	4.23865	0.8	0.534	1.91031e-131	1	Stum	1.49813
Gm9866	2.0211e-135	6.76264	0.73	0.461	6.7711e-131	1	Gm9866	1.58351
Cttnbp2	2.95565e-134	18.1357	0.994	0.952	9.90201e-130	1	Cttnbp2	1.04412
Gpr4	1.10582e-133	0.64553	0.228	0.051	3.70472e-129	1	Gpr4	4.47059
Scube2	3.53928e-133	8.14138	0.51	0.233	1.18573e-128	1	Scube2	2.18884
Gm48749	3.77026e-133	16.6903	0.703	0.423	1.26311e-128	1	Gm48749	1.66194
Cacna1g	5.96151e-132	9.6055	0.876	0.672	1.99722e-127	1	Cacna1g	1.30357
Tnfrsf11a	2.85672e-131	5.38222	0.443	0.185	9.57059e-127	1	Tnfrsf11a	2.39459
Dnm3	6.61673e-131	10.1862	0.982	0.93	2.21674e-126	1	Dnm3	1.05591
St3gal4	8.35035e-130	7.60477	0.567	0.287	2.79754e-125	1	St3gal4	1.97561
Mcu	4.66233e-129	3.36621	0.803	0.572	1.56197e-124	1	Mcu	1.40385
Rnf150	1.1894e-128	6.18572	0.927	0.756	3.98474e-124	1	Rnf150	1.22619
Ptpre	1.35611e-128	1.85448	0.428	0.171	4.54324e-124	1	Ptpre	2.50292
Sntg2	5.68937e-128	3.32008	0.754	0.469	1.90605e-123	1	Sntg2	1.60768
Clmp	1.11526e-127	2.77381	0.527	0.251	3.73634e-123	1	Clmp	2.0996
Kcnc1	2.38319e-127	5.69268	0.724	0.478	7.98417e-123	1	Kcnc1	1.51464
Chrna4	3.27484e-127	1.02506	0.337	0.114	1.09714e-122	1	Chrna4	2.95614
Ajap1	7.33944e-127	9.68115	0.7	0.431	2.45886e-122	1	Ajap1	1.62413
Gm48727	6.89839e-125	3.37392	0.564	0.293	2.3111e-120	1	Gm48727	1.92491
Rnf207	3.01815e-124	3.82426	0.556	0.281	1.01114e-119	1	Rnf207	1.97865
Ttc7b	7.51148e-124	14.4524	0.918	0.8	2.51649e-119	1	Ttc7b	1.1475
Fnbp1	3.73364e-123	2.79811	0.943	0.809	1.25085e-118	1	Fnbp1	1.16564
Ppm1e	7.14284e-123	1.74193	0.923	0.798	2.39299e-118	1	Ppm1e	1.15664
Ttc39b	1.21783e-122	2.0371	0.534	0.272	4.07996e-118	1	Ttc39b	1.96324
Ntn4	2.70895e-122	3.8931	0.291	0.09	9.07552e-118	1	Ntn4	3.23333
Atp11a	1.82484e-121	6.39786	0.813	0.59	6.11358e-117	1	Atp11a	1.37797
Gm48003	3.6001e-121	5.68882	0.398	0.16	1.2061e-116	1	Gm48003	2.4875
Osbpl2	4.01171e-121	23.0878	0.72	0.488	1.344e-116	1	Osbpl2	1.47541
Grk3	5.68781e-121	3.70032	0.753	0.508	1.90553e-116	1	Grk3	1.48228
Fhit	1.54111e-120	6.59947	0.8	0.593	5.16304e-116	1	Fhit	1.34907
C1qtnf4	2.15033e-120	2.50825	0.807	0.574	7.20403e-116	1	C1qtnf4	1.40592
Epha4	4.23112e-120	11.1056	0.813	0.595	1.41751e-115	1	Epha4	1.36639
Slc23a2	6.33556e-120	1.39838	0.883	0.719	2.12254e-115	1	Slc23a2	1.22809
Atrnl1	6.56122e-119	5.18935	0.948	0.847	2.19814e-114	1	Atrnl1	1.11924
AC124490.1	8.52875e-119	17.237	0.312	0.112	2.8573e-114	1	AC124490.1	2.78571
Mir124a-1hg	5.2254e-118	11.8689	0.906	0.738	1.75061e-113	1	Mir124a-1hg	1.22764
Tln2	1.14349e-117	6.85193	0.968	0.839	3.83092e-113	1	Tln2	1.15375
Calb1	1.98615e-117	3.55664	0.677	0.413	6.65399e-113	1	Calb1	1.63923
Tspan14	2.33688e-117	2.47056	0.594	0.337	7.82901e-113	1	Tspan14	1.76261
Vangl1	4.4682e-117	0.956565	0.69	0.435	1.49694e-112	1	Vangl1	1.58621
Sel1l3	8.36439e-117	9.58252	0.766	0.545	2.80224e-112	1	Sel1l3	1.4055
Afap1	2.13844e-116	1.96069	0.555	0.293	7.16419e-112	1	Afap1	1.8942
Gm32828	2.60081e-116	3.1878	0.407	0.171	8.71323e-112	1	Gm32828	2.38012
Sh3bp4	5.92849e-116	1.10105	0.569	0.3	1.98616e-111	1	Sh3bp4	1.89667
Tcf7l21	1.85815e-115	0.780909	0.991	0.95	6.22518e-111	1	Tcf7l2	1.04316
Gckr1	2.08637e-115	1.78533	0.423	0.18	6.98976e-111	1	Gckr	2.35
Gm38575	2.12343e-115	1.25247	0.166	0.031	7.11392e-111	1	Gm38575	5.35484
D630045J12Rik	2.19807e-114	1.02198	0.808	0.624	7.36399e-110	1	D630045J12Rik	1.29487
Galnt9	2.92384e-113	0.825778	0.699	0.452	9.79544e-109	1	Galnt9	1.54646
Gm20319	1.03734e-112	5.22546	0.362	0.141	3.47529e-108	1	Gm20319	2.56738
Rell1	1.4918e-112	0.993333	0.334	0.121	4.99784e-108	1	Rell1	2.76033
Gm12536	4.17016e-112	2.13093	0.265	0.082	1.39709e-107	1	Gm12536	3.23171
Gm15418	9.86428e-111	1.48659	0.408	0.175	3.30473e-106	1	Gm15418	2.33143
Btbd11	4.6307e-110	7.32507	0.956	0.85	1.55138e-105	1	Btbd11	1.12471
Ddo	1.69946e-108	3.28926	0.287	0.096	5.69355e-104	1	Ddo	2.98958
Lhcgr	6.81709e-108	0.956826	0.131	0.019	2.28386e-103	1	Lhcgr	6.89474
Adam23	1.50374e-107	0.947854	0.925	0.827	5.03783e-103	1	Adam23	1.1185
Dlgap3	7.83572e-107	4.24432	0.771	0.554	2.62512e-102	1	Dlgap3	1.3917
Ngf	1.95909e-106	0.907778	0.141	0.024	6.56333e-102	1	Ngf	5.875
Zfyve28	3.77121e-106	3.5616	0.784	0.567	1.26343e-101	1	Zfyve28	1.38272
Amotl1	2.38284e-105	6.83599	0.797	0.607	7.98298e-101	1	Amotl1	1.31301
Tasp1	2.98928e-105	5.07916	0.872	0.709	1.00147e-100	1	Tasp1	1.2299
Gm41414	3.19834e-105	9.61391	0.523	0.31	1.07151e-100	1	Gm41414	1.6871
Stxbp6	5.15062e-104	16.64	0.79	0.591	1.72556e-99	1	Stxbp6	1.33672
Phf24	7.78229e-104	7.38148	0.813	0.634	2.60722e-99	1	Phf24	1.28233
Man1a2	9.97845e-104	6.05825	0.898	0.748	3.34298e-99	1	Man1a2	1.20053
Klhl29	2.72756e-103	2.50948	0.958	0.886	9.13786e-99	1	Klhl29	1.08126
Col18a1	5.28874e-103	2.81913	0.478	0.24	1.77183e-98	1	Col18a1	1.99167
Abcc8	1.15536e-102	1.34155	0.314	0.115	3.87068e-98	1	Abcc8	2.73043
A830036E02Rik	1.6319e-102	1.17992	0.107	0.013	5.46717e-98	1	A830036E02Rik	8.23077
Actr3b	2.06532e-102	3.19999	0.708	0.476	6.91922e-98	1	Actr3b	1.48739
Acap2	7.82106e-102	11.6319	0.819	0.632	2.62021e-97	1	Acap2	1.29589
Apbb2	2.18644e-101	1.31546	0.957	0.876	7.32502e-97	1	Apbb2	1.09247
Shank3	2.72223e-101	5.06881	0.82	0.648	9.12e-97	1	Shank3	1.26543
Nell2	2.93654e-101	19.4844	0.986	0.902	9.83798e-97	1	Nell2	1.09313
Rnf130	3.67664e-101	9.08844	0.922	0.794	1.23175e-96	1	Rnf130	1.16121
AI593442	4.17328e-101	2.31471	0.577	0.331	1.39813e-96	1	AI593442	1.7432
Prickle2	6.36718e-101	28.6275	0.99	0.937	2.13313e-96	1	Prickle2	1.05656
Gm3294	7.04619e-101	0.753524	0.166	0.036	2.36061e-96	1	Gm3294	4.61111
Ndrg4	2.80972e-100	2.54254	0.885	0.738	9.41311e-96	1	Ndrg4	1.19919
Arhgap32	4.94042e-100	26.7554	0.903	0.786	1.65514e-95	1	Arhgap32	1.14885
Gm40841	5.71936e-99	2.5274	0.816	0.638	1.9161e-94	1	Gm40841	1.279
Nav2	5.42526e-98	15.2269	0.981	0.92	1.81757e-93	1	Nav2	1.0663
Ret	6.57069e-98	0.567966	0.135	0.024	2.20131e-93	1	Ret	5.625
Kndc1	8.13193e-98	5.64534	0.749	0.539	2.72436e-93	1	Kndc1	1.38961
Hook1	1.32471e-97	18.1806	0.882	0.738	4.43805e-93	1	Hook1	1.19512
Lin7a	1.44375e-96	3.50948	0.812	0.57	4.83685e-92	1	Lin7a	1.42456
Rgs16	3.16637e-96	1.34218	0.305	0.115	1.0608e-91	1	Rgs16	2.65217
Dixdc1	4.21181e-96	1.77482	0.799	0.597	1.41104e-91	1	Dixdc1	1.33836
Galk2	4.62778e-96	6.08621	0.688	0.467	1.5504e-91	1	Galk2	1.47323
Thrb	1.81773e-95	5.78399	0.929	0.78	6.08975e-91	1	Thrb	1.19103
Stk32c	3.83524e-95	1.5239	0.539	0.303	1.28488e-90	1	Stk32c	1.77888
Ppard	7.63785e-95	3.72339	0.446	0.225	2.55883e-90	1	Ppard	1.98222
Macrod2	1.4824e-94	4.67608	0.998	0.992	4.96634e-90	1	Macrod2	1.00605
Rasa4	1.84342e-94	1.14455	0.337	0.138	6.17581e-90	1	Rasa4	2.44203
Ttc14	1.84357e-94	4.0922	0.972	0.913	6.17633e-90	1	Ttc14	1.06462
Sacs	2.01677e-94	2.04163	0.746	0.53	6.7566e-90	1	Sacs	1.40755
Rcan21	2.49823e-94	1.55274	0.943	0.855	8.36959e-90	1	Rcan2	1.10292
Gm48006	2.87871e-94	1.67464	0.255	0.087	9.64424e-90	1	Gm48006	2.93103
Wnk2	3.76873e-94	12.1629	0.947	0.859	1.2626e-89	1	Wnk2	1.10244
Ppp4r4	5.28278e-94	3.4653	0.838	0.637	1.76984e-89	1	Ppp4r4	1.31554
Arhgef2	5.9589e-94	3.07784	0.493	0.262	1.99635e-89	1	Arhgef2	1.88168
Glce	5.98696e-94	2.22801	0.618	0.382	2.00575e-89	1	Glce	1.6178
Cachd1	1.2521e-93	2.94085	0.708	0.487	4.19479e-89	1	Cachd1	1.4538
Wnt9a	1.50341e-93	1.10035	0.347	0.146	5.03674e-89	1	Wnt9a	2.37671
Sntb1	2.4336e-93	2.05742	0.819	0.579	8.15305e-89	1	Sntb1	1.41451
Cyfip2	8.97361e-93	18.1338	0.861	0.737	3.00634e-88	1	Cyfip2	1.16825
Tmem170b	9.99441e-92	1.0059	0.534	0.294	3.34833e-87	1	Tmem170b	1.81633
Evi5	9.44937e-91	5.22112	0.79	0.592	3.16573e-86	1	Evi5	1.33446
Cdh12	4.83032e-90	9.39463	0.905	0.759	1.61825e-85	1	Cdh12	1.19236
Heg1	4.84099e-90	3.41774	0.214	0.065	1.62183e-85	1	Heg1	3.29231
Slc4a10	5.99925e-89	0.741361	0.942	0.873	2.00987e-84	1	Slc4a10	1.07904
Bsn	6.08272e-89	1.45078	0.887	0.751	2.03783e-84	1	Bsn	1.18109
Gm20635	2.3693e-88	2.60097	0.425	0.209	7.93764e-84	1	Gm20635	2.03349
Specc1	4.672e-88	7.88571	0.886	0.75	1.56521e-83	1	Specc1	1.18133
Tmc7	5.57887e-88	1.30323	0.401	0.192	1.86903e-83	1	Tmc7	2.08854
Rbm20	8.07142e-88	1.47948	0.243	0.083	2.70409e-83	1	Rbm20	2.92771
Kcnq3	5.86259e-87	1.59627	0.99	0.883	1.96409e-82	1	Kcnq3	1.12118
Socs6	1.36485e-86	4.58352	0.627	0.409	4.5725e-82	1	Socs6	1.53301
Man2a2	4.19814e-86	7.37512	0.637	0.428	1.40646e-81	1	Man2a2	1.48832
Gm15511	4.69024e-86	0.600287	0.407	0.196	1.57132e-81	1	Gm15511	2.07653
Dock7	1.10081e-85	7.47651	0.912	0.822	3.68792e-81	1	Dock7	1.10949
Slc41a2	3.45621e-85	4.81361	0.809	0.631	1.1579e-80	1	Slc41a2	1.28209
Aak1	5.42189e-85	1.6493	0.951	0.878	1.81644e-80	1	Aak1	1.08314
Megf9	6.27154e-85	0.912686	0.832	0.678	2.10109e-80	1	Megf9	1.22714
Slc12a8	7.33087e-85	1.88669	0.251	0.089	2.45599e-80	1	Slc12a8	2.82022
Lonrf1	7.99859e-85	5.72685	0.472	0.252	2.67969e-80	1	Lonrf1	1.87302
Rasgef1b	1.54164e-84	5.97879	0.944	0.855	5.16479e-80	1	Rasgef1b	1.10409
Gnal	2.68393e-84	8.33271	0.751	0.577	8.99172e-80	1	Gnal	1.30156
Map3k9	6.2148e-84	4.3072	0.439	0.228	2.08208e-79	1	Map3k9	1.92544
Hipk2	4.99773e-83	10.7068	0.783	0.621	1.67434e-78	1	Hipk2	1.26087
Kif6	6.34964e-83	5.24531	0.247	0.089	2.12726e-78	1	Kif6	2.77528
Sgk1	6.37399e-83	2.23752	0.764	0.546	2.13542e-78	1	Sgk1	1.39927
Gls	6.70551e-83	0.679114	0.976	0.928	2.24648e-78	1	Gls	1.05172
Ick	7.99799e-83	5.04629	0.488	0.282	2.67949e-78	1	Ick	1.7305
Lrrc49	1.33985e-82	5.36377	0.886	0.767	4.48875e-78	1	Lrrc49	1.15515
Tnfrsf23	2.43467e-82	0.927249	0.191	0.056	8.15662e-78	1	Tnfrsf23	3.41071
Kcnq2	5.55311e-82	4.05481	0.732	0.54	1.8604e-77	1	Kcnq2	1.35556
Triobp	5.615e-82	0.765331	0.21	0.066	1.88114e-77	1	Triobp	3.18182
Nacc2	1.44728e-81	1.18973	0.34	0.152	4.84869e-77	1	Nacc2	2.23684
Hlf	1.50383e-81	2.26255	0.697	0.485	5.03812e-77	1	Hlf	1.43711
Kcnab2	7.00293e-81	2.28066	0.48	0.271	2.34612e-76	1	Kcnab2	1.77122
Adora1	7.60908e-81	2.14343	0.396	0.195	2.5492e-76	1	Adora1	2.03077
Celf1	8.24488e-81	10.8229	0.932	0.841	2.7622e-76	1	Celf1	1.1082
Gm15943	1.86361e-80	0.668603	0.217	0.071	6.24347e-76	1	Gm15943	3.05634
Sirpa	1.8872e-80	1.3746	0.463	0.25	6.32251e-76	1	Sirpa	1.852
Tmcc3os	2.42095e-80	1.61368	0.226	0.078	8.11067e-76	1	Tmcc3os	2.89744
2900026A02Rik	2.53972e-80	1.79969	0.58	0.356	8.50858e-76	1	2900026A02Rik	1.62921
Chml	6.77555e-80	0.916607	0.104	0.017	2.26995e-75	1	Chml	6.11765
Gm283761	1.68898e-79	2.08802	0.223	0.462	5.6584e-75	1	Gm28376	0.482684
Acyp2	2.12482e-79	5.91592	0.881	0.748	7.11859e-75	1	Acyp2	1.17781
Srpk2	4.13337e-79	1.16625	0.956	0.907	1.38476e-74	1	Srpk2	1.05402
Cx3cl1	6.36571e-79	3.53136	0.659	0.445	2.13264e-74	1	Cx3cl1	1.4809
Nav3	1.18138e-78	4.6761	0.997	0.983	3.95787e-74	1	Nav3	1.01424
Tbc1d30	2.46219e-78	0.975182	0.647	0.434	8.24884e-74	1	Tbc1d30	1.49078
Asap2	2.48717e-78	10.6037	0.73	0.526	8.33251e-74	1	Asap2	1.38783
Fads6	3.00255e-78	1.15736	0.327	0.146	1.00592e-73	1	Fads6	2.23973
Grin1	1.14837e-77	12.067	0.924	0.835	3.84727e-73	1	Grin1	1.10659
Ddhd1	1.46284e-77	2.85323	0.863	0.712	4.9008e-73	1	Ddhd1	1.21208
Gm12296	1.33661e-76	6.48353	0.224	0.078	4.47791e-72	1	Gm12296	2.87179
Ncs1	2.1919e-76	7.6377	0.679	0.485	7.34331e-72	1	Ncs1	1.4
Arhgap44	5.69466e-76	10.8342	0.871	0.737	1.90782e-71	1	Arhgap44	1.18182
Plekhd1	7.1508e-76	1.37419	0.217	0.075	2.39566e-71	1	Plekhd1	2.89333
Nr4a1	1.55213e-75	3.42088	0.329	0.149	5.19996e-71	1	Nr4a1	2.20805
Ttc17	3.47419e-75	4.58891	0.82	0.675	1.16392e-70	1	Ttc17	1.21481
C030017B01Rik	6.2431e-75	1.03714	0.16	0.044	2.09156e-70	1	C030017B01Rik	3.63636
Ints6l	7.39702e-75	3.12361	0.577	0.373	2.47815e-70	1	Ints6l	1.54692
Scn1a	8.25943e-75	13.3268	0.95	0.853	2.76707e-70	1	Scn1a	1.11372
Lrrn1	9.37412e-75	2.24574	0.45	0.245	3.14052e-70	1	Lrrn1	1.83673
Dym	1.23783e-73	2.21853	0.85	0.717	4.14697e-69	1	Dym	1.1855
Nfasc	1.75902e-73	2.29101	0.938	0.869	5.89306e-69	1	Nfasc	1.0794
Acsl6	3.26628e-73	10.3303	0.651	0.463	1.09427e-68	1	Acsl6	1.40605
Slc17a8	3.76121e-73	7.22953	0.176	0.053	1.26008e-68	1	Slc17a8	3.32075
Zbtb7c	5.07969e-73	3.67403	0.566	0.368	1.7018e-68	1	Zbtb7c	1.53804
Faah	5.5439e-73	2.11506	0.494	0.294	1.85732e-68	1	Faah	1.68027
Cerk	1.84971e-72	2.33585	0.577	0.364	6.1969e-68	1	Cerk	1.58516
Gm9962	5.29447e-72	0.669315	0.324	0.147	1.77375e-67	1	Gm9962	2.20408
2900055J20Rik	6.48634e-72	1.11336	0.221	0.08	2.17305e-67	1	2900055J20Rik	2.7625
Bin1	9.15694e-72	3.71755	0.886	0.758	3.06776e-67	1	Bin1	1.16887
Gxylt2	1.43407e-71	0.556331	0.168	0.049	4.80442e-67	1	Gxylt2	3.42857
Otud7a	1.65501e-71	3.13555	0.952	0.891	5.5446e-67	1	Otud7a	1.06846
Arhgap42	2.70827e-71	1.72576	0.505	0.296	9.07325e-67	1	Arhgap42	1.70608
R3hdm2	3.5181e-71	4.2709	0.908	0.815	1.17863e-66	1	R3hdm2	1.11411
Camta1	6.34827e-71	29.6539	0.98	0.935	2.1268e-66	1	Camta1	1.04813
Mturn	7.83882e-71	1.44565	0.484	0.281	2.62616e-66	1	Mturn	1.72242
Camk1d	1.28518e-70	8.05034	0.972	0.924	4.30561e-66	1	Camk1d	1.05195
Eps81	2.65964e-70	2.21836	0.78	0.612	8.91031e-66	1	Eps8	1.27451
Dhx32	1.3052e-69	2.27918	0.638	0.445	4.37269e-65	1	Dhx32	1.43371
Ttll5	2.38823e-69	3.71767	0.816	0.663	8.00105e-65	1	Ttll5	1.23077
Tbk1	2.51751e-69	1.85601	0.58	0.388	8.43415e-65	1	Tbk1	1.49485
Scn8a	3.13929e-69	0.651653	0.942	0.857	1.05172e-64	1	Scn8a	1.09918
Eps15	3.34444e-69	3.20003	0.655	0.468	1.12046e-64	1	Eps15	1.39957
Oxct1	4.21328e-69	9.09672	0.922	0.842	1.41153e-64	1	Oxct1	1.09501
Rnf112	5.18864e-69	2.59287	0.827	0.665	1.7383e-64	1	Rnf112	1.24361
Tcerg1	7.28329e-69	0.756712	0.797	0.637	2.44005e-64	1	Tcerg1	1.25118
D1Ertd622e	1.53946e-68	1.60378	0.396	0.212	5.15751e-64	1	D1Ertd622e	1.86792
Mir124-2hg1	1.95669e-68	1.78953	0.89	0.762	6.55532e-64	1	Mir124-2hg	1.16798
Slc1a1	2.07109e-68	5.12401	0.704	0.52	6.93858e-64	1	Slc1a1	1.35385
Rbfox2	2.09774e-68	16.6681	0.952	0.907	7.02784e-64	1	Rbfox2	1.04961
Gpr153	3.23679e-68	4.00235	0.465	0.274	1.08439e-63	1	Gpr153	1.69708
Vldlr	1.68945e-67	0.72354	0.461	0.27	5.66e-63	1	Vldlr	1.70741
Sorbs2os	2.20978e-67	0.60198	0.798	0.645	7.40321e-63	1	Sorbs2os	1.23721
Rflnb	1.27735e-66	1.02345	0.323	0.153	4.27937e-62	1	Rflnb	2.11111
Pla2g3	1.37952e-66	2.13375	0.343	0.172	4.62167e-62	1	Pla2g3	1.99419
Ccdc60	1.6952e-66	2.01698	0.143	0.039	5.67927e-62	1	Ccdc60	3.66667
Ogfrl1	2.81658e-66	0.537605	0.708	0.528	9.43611e-62	1	Ogfrl1	1.34091
Cpne5	9.08598e-66	1.76407	0.369	0.189	3.04399e-61	1	Cpne5	1.95238
Dcc	1.95205e-65	61.3931	0.943	0.874	6.53975e-61	1	Dcc	1.07895
Lncenc1	2.2337e-65	1.04028	0.241	0.095	7.48333e-61	1	Lncenc1	2.53684
Kcna4	2.89444e-65	2.15186	0.624	0.436	9.69696e-61	1	Kcna4	1.43119
Atpaf1	3.41175e-65	1.92589	0.53	0.336	1.143e-60	1	Atpaf1	1.57738
A330102I10Rik	3.77914e-65	3.52903	0.725	0.545	1.26609e-60	1	A330102I10Rik	1.33028
Polb	4.21051e-65	1.27367	0.836	0.706	1.4106e-60	1	Polb	1.18414
Kcnk3	4.9618e-65	1.44219	0.366	0.189	1.6623e-60	1	Kcnk3	1.93651
Atp11b	5.08969e-65	3.2531	0.733	0.58	1.70515e-60	1	Atp11b	1.26379
Thsd7b	5.34723e-65	21.943	0.825	0.734	1.79143e-60	1	Thsd7b	1.12398
Utrn	1.21468e-64	4.43855	0.503	0.296	4.06941e-60	1	Utrn	1.69932
Tpcn1	4.75234e-64	2.37707	0.348	0.176	1.59213e-59	1	Tpcn1	1.97727
Sfxn2	5.82666e-64	1.52317	0.415	0.236	1.95205e-59	1	Sfxn2	1.75847
Bbx	6.21169e-64	3.58953	0.668	0.493	2.08104e-59	1	Bbx	1.35497
Dcaf6	6.44289e-64	1.60426	0.869	0.751	2.1585e-59	1	Dcaf6	1.15712
Reep2	8.94004e-64	2.73164	0.687	0.519	2.99509e-59	1	Reep2	1.3237
Mprip	9.21448e-64	3.46987	0.904	0.809	3.08704e-59	1	Mprip	1.11743
Ago4	1.10461e-63	2.08997	0.642	0.446	3.70067e-59	1	Ago4	1.43946
Rttn	1.3461e-63	2.12647	0.608	0.422	4.5097e-59	1	Rttn	1.44076
Kcnn3	1.57425e-63	5.06316	0.865	0.724	5.27405e-59	1	Kcnn3	1.19475
Piezo2	2.94358e-63	1.73465	0.201	0.073	9.86159e-59	1	Piezo2	2.75342
Hs6st1	6.16762e-63	1.32274	0.396	0.218	2.06627e-58	1	Hs6st1	1.81651
Far2	1.14272e-62	0.7769	0.754	0.59	3.82835e-58	1	Far2	1.27797
Cdh24	1.33299e-62	1.37296	0.204	0.076	4.46579e-58	1	Cdh24	2.68421
Apba2	2.30329e-62	9.35513	0.92	0.823	7.71648e-58	1	Apba2	1.11786
Cdan1	2.53733e-62	1.1309	0.416	0.238	8.50055e-58	1	Cdan1	1.7479
Slc44a1	2.60807e-62	6.43101	0.805	0.672	8.73757e-58	1	Slc44a1	1.19792
Shank2	3.14283e-62	0.60354	0.899	0.809	1.05291e-57	1	Shank2	1.11125
Anxa6	4.95741e-62	3.20861	0.639	0.452	1.66083e-57	1	Anxa6	1.41372
Gm16351	5.14832e-62	2.0655	0.526	0.334	1.72479e-57	1	Gm16351	1.57485
Pacsin1	5.66249e-62	12.25	0.92	0.828	1.89705e-57	1	Pacsin1	1.11111
Ctnnal1	8.22371e-62	2.95823	0.741	0.563	2.75511e-57	1	Ctnnal1	1.31616
Creg1	4.36121e-61	3.06972	0.536	0.347	1.46109e-56	1	Creg1	1.54467
Ubr5	4.62714e-61	4.67418	0.932	0.853	1.55018e-56	1	Ubr5	1.09261
Slc25a37	5.03963e-61	1.97345	0.212	0.082	1.68838e-56	1	Slc25a37	2.58537
Ctr9	6.76651e-61	2.44583	0.541	0.357	2.26692e-56	1	Ctr9	1.51541
Atp6ap2	7.00655e-61	11.782	0.794	0.674	2.34733e-56	1	Atp6ap2	1.17804
Agrn	1.00958e-60	0.885105	0.693	0.525	3.38229e-56	1	Agrn	1.32
Nexn	1.81162e-60	4.65855	0.433	0.253	6.06929e-56	1	Nexn	1.71146
Itga3	1.9712e-60	1.37054	0.429	0.25	6.60391e-56	1	Itga3	1.716
Gm13710	2.53471e-60	0.54119	0.159	0.05	8.49177e-56	1	Gm13710	3.18
Hdac4	1.04964e-59	1.57744	0.69	0.53	3.5165e-55	1	Hdac4	1.30189
Abcc5	1.96996e-59	3.01691	0.918	0.854	6.59975e-55	1	Abcc5	1.07494
Sdk2	2.31772e-59	16.0128	0.859	0.695	7.76483e-55	1	Sdk2	1.23597
Mgat5	2.94023e-59	9.7252	0.882	0.785	9.85036e-55	1	Mgat5	1.12357
Sfxn5	5.97379e-59	2.98751	0.751	0.6	2.00134e-54	1	Sfxn5	1.25167
Srgap2	1.18022e-58	13.3703	0.935	0.841	3.95397e-54	1	Srgap2	1.11177
Vps13d	1.65381e-58	2.53036	0.857	0.737	5.54059e-54	1	Vps13d	1.16282
Wdr37	3.42442e-58	5.53488	0.759	0.619	1.14725e-53	1	Wdr37	1.22617
Prkcz	4.01717e-58	0.580502	0.811	0.693	1.34583e-53	1	Prkcz	1.17027
Fbxl20	4.5308e-58	1.31873	0.817	0.697	1.51791e-53	1	Fbxl20	1.17217
Snx6	4.77008e-58	3.44345	0.687	0.524	1.59807e-53	1	Snx6	1.31107
Wdr47	6.38632e-58	5.85269	0.754	0.606	2.13955e-53	1	Wdr47	1.24422
Alpk11	1.71156e-57	0.559333	0.251	0.111	5.73405e-53	1	Alpk1	2.26126
Rab6b	3.75437e-57	0.713599	0.865	0.754	1.25779e-52	1	Rab6b	1.14721
Myrip	1.1018e-56	1.02997	0.882	0.745	3.69124e-52	1	Myrip	1.18389
Wnt4	2.77197e-56	1.44067	0.287	0.138	9.28664e-52	1	Wnt4	2.07971
Cyth1	5.4903e-56	1.77062	0.618	0.435	1.83936e-51	1	Cyth1	1.42069
Slc22a23	6.35003e-56	4.60474	0.754	0.596	2.12739e-51	1	Slc22a23	1.2651
Msrb3	8.82302e-56	1.76916	0.418	0.241	2.95589e-51	1	Msrb3	1.73444
Bok	1.21381e-55	0.621028	0.221	0.093	4.0665e-51	1	Bok	2.37634
Fdxr	3.0293e-55	1.58434	0.396	0.231	1.01488e-50	1	Fdxr	1.71429
Wnt3	3.67994e-55	1.32469	0.398	0.229	1.23285e-50	1	Wnt3	1.73799
Ppp2r5d	3.69177e-55	0.683381	0.338	0.178	1.23682e-50	1	Ppp2r5d	1.89888
6330576A10Rik	4.04989e-55	0.907097	0.12	0.032	1.3568e-50	1	6330576A10Rik	3.75
Mmp16	5.63799e-55	2.17863	0.925	0.856	1.88884e-50	1	Mmp16	1.08061
Gm29865	7.84099e-55	1.61091	0.53	0.344	2.62689e-50	1	Gm29865	1.5407
Itsn1	1.07532e-54	11.3764	0.957	0.887	3.60252e-50	1	Itsn1	1.07892
Plppr5	1.66503e-54	5.74435	0.537	0.362	5.57819e-50	1	Plppr5	1.48343
Bcl2l11	1.75811e-54	0.594898	0.101	0.024	5.89001e-50	1	Bcl2l11	4.20833
Fam222a	1.86148e-54	0.784398	0.352	0.189	6.23633e-50	1	Fam222a	1.86243
Snrk	2.91442e-54	2.88815	0.618	0.445	9.76388e-50	1	Snrk	1.38876
Gm15083	3.53885e-54	0.567963	0.226	0.096	1.18558e-49	1	Gm15083	2.35417
Gm48728	3.75305e-54	0.587363	0.268	0.125	1.25735e-49	1	Gm48728	2.144
Adra1b	1.13342e-53	1.59307	0.558	0.372	3.79719e-49	1	Adra1b	1.5
Bmpr1b	3.7452e-53	3.22195	0.166	0.059	1.25472e-48	1	Bmpr1b	2.81356
Miga2	4.73969e-53	3.7235	0.639	0.485	1.58789e-48	1	Miga2	1.31753
Ube2d1	4.88662e-53	1.05319	0.592	0.413	1.63711e-48	1	Ube2d1	1.43341
Tspoap1	7.87771e-53	1.67016	0.729	0.584	2.63919e-48	1	Tspoap1	1.24829
Dhdds	8.76558e-53	5.91628	0.704	0.539	2.93664e-48	1	Dhdds	1.30612
Depdc5	9.49782e-53	1.76879	0.746	0.593	3.18196e-48	1	Depdc5	1.25801
Ccdc134	1.25496e-52	1.42134	0.382	0.216	4.20435e-48	1	Ccdc134	1.76852
Cyp46a1	2.50268e-52	1.57503	0.592	0.413	8.38447e-48	1	Cyp46a1	1.43341
Camk2b	2.97199e-52	1.52176	0.858	0.757	9.95677e-48	1	Camk2b	1.13342
Fem1c	3.40017e-52	2.03921	0.501	0.331	1.13912e-47	1	Fem1c	1.5136
Lrtm2	3.4841e-52	3.93526	0.494	0.323	1.16724e-47	1	Lrtm2	1.52941
Rgs11	6.64799e-52	2.96914	0.504	0.326	2.22721e-47	1	Rgs11	1.54601
F11r	1.40511e-51	0.595907	0.215	0.092	4.70739e-47	1	F11r	2.33696
Adam15	1.44231e-51	1.28674	0.412	0.249	4.83202e-47	1	Adam15	1.65462
Evl	1.62139e-51	3.11346	0.849	0.743	5.43199e-47	1	Evl	1.14266
Orc2	1.74375e-51	1.80912	0.66	0.511	5.8419e-47	1	Orc2	1.29159
Pdp1	3.13304e-51	2.92694	0.655	0.495	1.04963e-46	1	Pdp1	1.32323
Bod1l	3.55947e-51	3.0265	0.734	0.589	1.19249e-46	1	Bod1l	1.24618
Gm13944	4.03968e-51	0.543073	0.236	0.105	1.35337e-46	1	Gm13944	2.24762
Cd247	4.19885e-51	1.61562	0.492	0.313	1.4067e-46	1	Cd247	1.57188
Cyld	4.55001e-51	0.830374	0.89	0.809	1.52434e-46	1	Cyld	1.10012
Jakmip1	5.11249e-51	24.7613	0.87	0.793	1.71279e-46	1	Jakmip1	1.0971
Gm14169	5.21151e-51	0.53796	0.155	0.054	1.74596e-46	1	Gm14169	2.87037
Hdac5	8.56747e-51	0.635713	0.561	0.392	2.87027e-46	1	Hdac5	1.43112
Ap2b1	1.15424e-50	0.728611	0.84	0.733	3.86693e-46	1	Ap2b1	1.14598
Gm123941	1.26405e-50	1.76342	0.327	0.178	4.23482e-46	1	Gm12394	1.83708
Ubn2	2.77483e-50	3.40728	0.959	0.924	9.29624e-46	1	Ubn2	1.03788
Pde1b	2.87567e-50	3.81787	0.553	0.381	9.63408e-46	1	Pde1b	1.45144
Cntn2	2.96064e-50	1.12111	0.453	0.283	9.91872e-46	1	Cntn2	1.60071
Zfp365	3.50552e-50	0.972827	0.381	0.222	1.17442e-45	1	Zfp365	1.71622
Kcnd3	3.71663e-50	3.58459	0.864	0.776	1.24514e-45	1	Kcnd3	1.1134
Nipal2	4.62943e-50	13.4897	0.812	0.697	1.55095e-45	1	Nipal2	1.16499
Prss48	5.1921e-50	0.590481	0.276	0.135	1.73946e-45	1	Prss48	2.04444
Etnk1	6.4778e-50	3.69175	0.91	0.831	2.17019e-45	1	Etnk1	1.09507
Elfn2	6.48859e-50	2.8208	0.495	0.328	2.17381e-45	1	Elfn2	1.50915
Pdgfc	8.78512e-50	1.00085	0.323	0.17	2.94319e-45	1	Pdgfc	1.9
Vps37b	1.43621e-49	0.679603	0.245	0.113	4.8116e-45	1	Vps37b	2.16814
Fam49a	1.4632e-49	2.34856	0.733	0.584	4.902e-45	1	Fam49a	1.25514
Slc20a1	3.81113e-49	1.22608	0.503	0.333	1.27681e-44	1	Slc20a1	1.51051
Lrrtm1	6.24539e-49	2.05583	0.658	0.491	2.09233e-44	1	Lrrtm1	1.34012
Hdac9	6.34825e-49	5.12804	0.993	0.965	2.12679e-44	1	Hdac9	1.02902
Thoc2	9.48881e-49	3.95122	0.833	0.708	3.17894e-44	1	Thoc2	1.17655
Lgi3	9.5174e-49	0.76589	0.328	0.177	3.18852e-44	1	Lgi3	1.85311
Ppp2r2a	9.51854e-49	6.69511	0.75	0.614	3.1889e-44	1	Ppp2r2a	1.2215
Zfp827	1.12294e-48	2.15228	0.765	0.624	3.76206e-44	1	Zfp827	1.22596
Gm47591	1.25402e-48	2.24052	0.339	0.195	4.20123e-44	1	Gm47591	1.73846
Dkk2	1.26843e-48	5.11803	0.193	0.08	4.24949e-44	1	Dkk2	2.4125
Map3k1	1.62928e-48	1.53972	0.35	0.197	5.45841e-44	1	Map3k1	1.77665
2700069I18Rik	1.87529e-48	3.46488	0.369	0.213	6.2826e-44	1	2700069I18Rik	1.73239
A630089N07Rik	3.52622e-48	1.47879	0.501	0.334	1.18135e-43	1	A630089N07Rik	1.5
Oprm1	4.84891e-48	10.222	0.824	0.679	1.62448e-43	1	Oprm1	1.21355
Dok6	4.92111e-48	0.807215	0.915	0.845	1.64867e-43	1	Dok6	1.08284
Adar	6.18264e-48	0.985422	0.765	0.635	2.07131e-43	1	Adar	1.20472
Shprh	1.54645e-47	3.38989	0.697	0.564	5.18092e-43	1	Shprh	1.23582
Kcnj6	2.10427e-47	11.8924	0.83	0.702	7.04972e-43	1	Kcnj6	1.18234
Smad3	5.48325e-47	0.569238	0.3	0.156	1.837e-42	1	Smad3	1.92308
Rps6ka5	9.38106e-47	13.6978	0.762	0.62	3.14284e-42	1	Rps6ka5	1.22903
Atp2c1	1.39415e-46	2.61303	0.9	0.839	4.67068e-42	1	Atp2c1	1.07271
Ntsr1	1.41987e-46	0.737015	0.117	0.036	4.75684e-42	1	Ntsr1	3.25
Snapc4	1.5205e-46	1.38343	0.418	0.257	5.09398e-42	1	Snapc4	1.62646
Nsmf	2.04028e-46	4.43546	0.676	0.535	6.83536e-42	1	Nsmf	1.26355
Usp13	4.08001e-46	1.10517	0.589	0.43	1.36689e-41	1	Usp13	1.36977
Ncan	4.26873e-46	1.19588	0.395	0.242	1.43011e-41	1	Ncan	1.63223
Ppp1r13b	4.82034e-46	1.47718	0.813	0.704	1.61491e-41	1	Ppp1r13b	1.15483
Cwh43	5.28409e-46	0.580733	0.147	0.053	1.77027e-41	1	Cwh43	2.77358
Fus	1.51877e-45	4.62076	0.947	0.892	5.08818e-41	1	Fus	1.06166
Pcnx2	1.57041e-45	9.087	0.801	0.672	5.2612e-41	1	Pcnx2	1.19196
Ddx17	1.69517e-45	10.5385	0.844	0.745	5.67917e-41	1	Ddx17	1.13289
Jade3	1.70231e-45	0.569222	0.381	0.227	5.70306e-41	1	Jade3	1.67841
Ylpm1	2.07946e-45	1.40972	0.875	0.772	6.96661e-41	1	Ylpm1	1.13342
Smarcd3	2.92563e-45	0.804587	0.58	0.416	9.80144e-41	1	Smarcd3	1.39423
Ddb2	4.11728e-45	1.49427	0.514	0.349	1.37937e-40	1	Ddb2	1.47278
Otud4	4.31429e-45	2.02634	0.681	0.536	1.44537e-40	1	Otud4	1.27052
Hcn2	4.86863e-45	1.88965	0.546	0.387	1.63109e-40	1	Hcn2	1.41085
Kifc2	6.5612e-45	1.03078	0.655	0.501	2.19813e-40	1	Kifc2	1.30739
4930414F18Rik	7.17855e-45	1.79888	0.138	0.049	2.40496e-40	1	4930414F18Rik	2.81633
Samd14	2.61017e-44	0.645838	0.371	0.219	8.74461e-40	1	Samd14	1.69406
Anp32a	2.77209e-44	0.52849	0.495	0.344	9.28704e-40	1	Anp32a	1.43895
Ergic1	2.82379e-44	3.19316	0.712	0.563	9.46028e-40	1	Ergic1	1.26465
Arntl	3.60516e-44	3.04284	0.732	0.581	1.2078e-39	1	Arntl	1.2599
Txlna	8.20676e-44	1.01561	0.345	0.199	2.74943e-39	1	Txlna	1.73367
Plec	9.00295e-44	1.27377	0.604	0.446	3.01617e-39	1	Plec	1.35426
Col4a1	1.56032e-43	0.989132	0.387	0.235	5.22738e-39	1	Col4a1	1.64681
Nckap1	1.81044e-43	1.80578	0.906	0.827	6.06535e-39	1	Nckap1	1.09553
Fam19a5	2.2131e-43	5.91142	0.296	0.168	7.41433e-39	1	Fam19a5	1.7619
Emsy	4.20063e-43	0.88642	0.698	0.553	1.40729e-38	1	Emsy	1.26221
Abcb9	8.2186e-43	0.875094	0.308	0.17	2.75339e-38	1	Abcb9	1.81176
Tdrd7	1.51068e-42	1.05025	0.474	0.319	5.06106e-38	1	Tdrd7	1.48589
Mysm1	1.56256e-42	1.22529	0.729	0.595	5.23488e-38	1	Mysm1	1.22521
Map4k4	2.58423e-42	2.09048	0.747	0.617	8.65768e-38	1	Map4k4	1.2107
Usp2	2.95928e-42	0.996881	0.545	0.387	9.91419e-38	1	Usp2	1.40827
Unc45a	7.65754e-42	2.73901	0.472	0.317	2.56543e-37	1	Unc45a	1.48896
Psg16	8.68979e-42	1.17773	0.362	0.213	2.91125e-37	1	Psg16	1.69953
Ndufa10	1.02392e-41	1.95473	0.627	0.485	3.43033e-37	1	Ndufa10	1.29278
Mfsd4a	1.10444e-41	1.50025	0.46	0.309	3.70008e-37	1	Mfsd4a	1.48867
Pakap.1	1.29811e-41	22.4377	0.598	0.544	4.34893e-37	1	Pakap.1	1.09926
Nhsl2	1.666e-41	4.98838	0.729	0.587	5.58145e-37	1	Nhsl2	1.24191
Dlg4	1.83293e-41	7.29222	0.682	0.551	6.1407e-37	1	Dlg4	1.23775
Iqgap1	2.44645e-41	1.66652	0.699	0.557	8.1961e-37	1	Iqgap1	1.25494
Pamr1	3.14955e-41	1.97731	0.458	0.299	1.05516e-36	1	Pamr1	1.53177
Bicdl1	3.2819e-41	3.86634	0.812	0.704	1.0995e-36	1	Bicdl1	1.15341
Paqr8	9.35853e-41	0.899968	0.404	0.254	3.13529e-36	1	Paqr8	1.59055
Gm16337	1.06621e-40	0.752983	0.318	0.18	3.57201e-36	1	Gm16337	1.76667
Trim17	1.21544e-40	0.647138	0.206	0.096	4.07197e-36	1	Trim17	2.14583
Nphp4	1.29301e-40	1.58476	0.448	0.292	4.33183e-36	1	Nphp4	1.53425
Fam13b1	1.55092e-40	1.21505	0.788	0.676	5.19589e-36	1	Fam13b	1.16568
Gm5149	2.47773e-40	0.541911	0.235	0.116	8.30088e-36	1	Gm5149	2.02586
C78859	2.52482e-40	3.06218	0.598	0.441	8.45865e-36	1	C78859	1.35601
Gm48747	4.72624e-40	3.76434	0.577	0.442	1.58338e-35	1	Gm48747	1.30543
Smpd4	1.64288e-39	0.805437	0.408	0.262	5.50399e-35	1	Smpd4	1.55725
Siah3	2.04737e-39	1.90757	0.225	0.111	6.85909e-35	1	Siah3	2.02703
Parp1	2.37835e-39	1.24646	0.474	0.324	7.96795e-35	1	Parp1	1.46296
Fam163a	5.29154e-39	0.920657	0.121	0.042	1.77277e-34	1	Fam163a	2.88095
Dzank1	6.71271e-39	2.57294	0.806	0.694	2.24889e-34	1	Dzank1	1.16138
Gm15494	8.162e-39	0.615798	0.235	0.12	2.73443e-34	1	Gm15494	1.95833
Fam189a1	1.06006e-38	9.45564	0.916	0.77	3.55142e-34	1	Fam189a1	1.18961
Gpt2	1.48452e-38	2.20826	0.361	0.221	4.97344e-34	1	Gpt2	1.63348
Trpm2	2.23512e-38	1.9255	0.464	0.317	7.48811e-34	1	Trpm2	1.46372
Nt5dc3	2.97456e-38	8.97979	0.596	0.46	9.96538e-34	1	Nt5dc3	1.29565
Cpsf3	3.02405e-38	1.14582	0.507	0.357	1.01312e-33	1	Cpsf3	1.42017
Clstn3	3.3958e-38	2.51334	0.765	0.65	1.13766e-33	1	Clstn3	1.17692
Atp8b2	4.81082e-38	1.59978	0.433	0.288	1.61172e-33	1	Atp8b2	1.50347
Frmpd2	4.96266e-38	1.18387	0.25	0.13	1.66259e-33	1	Frmpd2	1.92308
Synj2	5.13279e-38	0.854251	0.316	0.185	1.71959e-33	1	Synj2	1.70811
4930547E14Rik	5.70896e-38	0.756234	0.271	0.148	1.91261e-33	1	4930547E14Rik	1.83108
L1cam	7.97645e-38	4.91885	0.701	0.544	2.67227e-33	1	L1cam	1.2886
B930095G15Rik	1.09691e-37	0.879886	0.278	0.155	3.67486e-33	1	B930095G15Rik	1.79355
Nab1	1.47265e-37	0.963642	0.363	0.224	4.93367e-33	1	Nab1	1.62054
Fbxo34	2.26157e-37	1.65564	0.582	0.434	7.57672e-33	1	Fbxo34	1.34101
Usp53	2.95045e-37	2.89637	0.578	0.435	9.8846e-33	1	Usp53	1.32874
Rapgef2	3.7794e-37	7.65946	0.859	0.764	1.26617e-32	1	Rapgef2	1.12435
Pdcd4	3.96081e-37	2.92519	0.628	0.495	1.32695e-32	1	Pdcd4	1.26869
Adgrl1	3.99389e-37	0.565387	0.802	0.698	1.33803e-32	1	Adgrl1	1.149
2023-03-02	4.0299e-37	3.07416	0.569	0.423	1.3501e-32	1	2023-03-02	1.34515
Setd7	4.33574e-37	1.80857	0.707	0.596	1.45256e-32	1	Setd7	1.18624
Nuak1	5.92532e-37	0.816847	0.291	0.166	1.9851e-32	1	Nuak1	1.75301
Ppp2r5e	8.2087e-37	3.99457	0.791	0.691	2.75008e-32	1	Ppp2r5e	1.14472
Tbl1xr1	9.7647e-37	2.49538	0.521	0.379	3.27137e-32	1	Tbl1xr1	1.37467
Snx20	9.97862e-37	1.68608	0.117	0.042	3.34304e-32	1	Snx20	2.78571
Me1	1.0097e-36	1.75723	0.612	0.469	3.38269e-32	1	Me1	1.3049
Neurl1b	1.103e-36	0.830972	0.319	0.188	3.69526e-32	1	Neurl1b	1.69681
Cask1	1.41444e-36	0.577474	0.911	0.836	4.73867e-32	1	Cask	1.08971
Snap23	1.51262e-36	0.695493	0.511	0.362	5.06758e-32	1	Snap23	1.4116
Daam1	1.90389e-36	3.55819	0.812	0.696	6.37841e-32	1	Daam1	1.16667
Itgb1	1.95926e-36	3.78314	0.602	0.46	6.5639e-32	1	Itgb1	1.3087
Fam19a4	2.22065e-36	1.98228	0.151	0.063	7.43961e-32	1	Fam19a4	2.39683
Kcnk1	2.48629e-36	0.634268	0.407	0.265	8.32957e-32	1	Kcnk1	1.53585
Kdm7a	3.25121e-36	0.967084	0.625	0.484	1.08922e-31	1	Kdm7a	1.29132
Ltbp4	3.34561e-36	0.812118	0.348	0.213	1.12084e-31	1	Ltbp4	1.6338
Cep104	3.41343e-36	1.18214	0.4	0.262	1.14357e-31	1	Cep104	1.52672
Strn3	4.84934e-36	0.797582	0.919	0.865	1.62463e-31	1	Strn3	1.06243
Cox7b2	4.96687e-36	6.61723	0.314	0.186	1.664e-31	1	Cox7b2	1.68817
Etv5	5.8442e-36	0.650765	0.208	0.102	1.95793e-31	1	Etv5	2.03922
Eftud2	9.15017e-36	3.08013	0.448	0.308	3.06549e-31	1	Eftud2	1.45455
Rnf24	9.3552e-36	1.6778	0.548	0.41	3.13418e-31	1	Rnf24	1.33659
2023-09-11	1.18492e-35	0.559802	0.732	0.61	3.96972e-31	1	2023-09-11	1.2
Zfp697	1.34053e-35	2.21749	0.416	0.277	4.49104e-31	1	Zfp697	1.50181
Abhd6	1.36176e-35	1.02361	0.635	0.497	4.56217e-31	1	Abhd6	1.27767
Gpr176	1.83168e-35	1.91875	0.304	0.454	6.13651e-31	1	Gpr176	0.669604
Taf1	1.90674e-35	3.16384	0.697	0.567	6.38794e-31	1	Taf1	1.22928
Ubr3	2.10291e-35	1.11929	0.92	0.866	7.04518e-31	1	Ubr3	1.06236
Inpp4a	2.23016e-35	1.38495	0.77	0.658	7.47147e-31	1	Inpp4a	1.17021
Nmt2	2.23076e-35	7.98407	0.869	0.762	7.47351e-31	1	Nmt2	1.14042
Zranb1	2.4392e-35	1.56608	0.707	0.592	8.1718e-31	1	Zranb1	1.19426
Smad7	2.52302e-35	0.945037	0.388	0.252	8.45262e-31	1	Smad7	1.53968
Dysf	2.87357e-35	2.07557	0.371	0.237	9.62703e-31	1	Dysf	1.5654
Dgke	3.17749e-35	1.14421	0.553	0.411	1.06452e-30	1	Dgke	1.3455
Rspry1	4.2695e-35	15.227	0.656	0.523	1.43037e-30	1	Rspry1	1.2543
Ndst1	4.90821e-35	2.32222	0.534	0.392	1.64435e-30	1	Ndst1	1.36224
Ankrd27	5.64144e-35	2.19772	0.555	0.405	1.88999e-30	1	Ankrd27	1.37037
2023-03-11	5.86756e-35	2.68168	0.277	0.158	1.96575e-30	1	2023-03-11	1.75316
Unc13a	8.5267e-35	5.05427	0.792	0.684	2.85661e-30	1	Unc13a	1.15789
Usp4	8.68284e-35	0.851654	0.621	0.501	2.90893e-30	1	Usp4	1.23952
Jag2	8.96845e-35	0.604895	0.43	0.291	3.00461e-30	1	Jag2	1.47766
Stab2	1.17812e-34	2.01337	0.189	0.091	3.94694e-30	1	Stab2	2.07692
Arhgap22	1.19059e-34	2.96261	0.526	0.377	3.98871e-30	1	Arhgap22	1.39523
Gm26917	1.65444e-34	15.2014	0.831	0.741	5.54269e-30	1	Gm26917	1.12146
Reck	2.46726e-34	0.865505	0.446	0.307	8.2658e-30	1	Reck	1.45277
Numb	2.46895e-34	1.95474	0.683	0.564	8.27149e-30	1	Numb	1.21099
Rnf165	2.90921e-34	8.81962	0.755	0.627	9.74642e-30	1	Rnf165	1.20415
Gm39185	4.50333e-34	1.0983	0.143	0.06	1.50871e-29	1	Gm39185	2.38333
Slc6a7	6.33804e-34	0.911133	0.68	0.541	2.12337e-29	1	Slc6a7	1.25693
Calm1	6.96785e-34	13.5666	0.956	0.915	2.33437e-29	1	Calm1	1.04481
Usp28	1.3316e-33	1.98041	0.512	0.368	4.46113e-29	1	Usp28	1.3913
Mthfr	1.39183e-33	1.76501	0.452	0.314	4.66292e-29	1	Mthfr	1.43949
Cldn12	2.22804e-33	0.953815	0.38	0.248	7.46439e-29	1	Cldn12	1.53226
Phip	2.33024e-33	3.37922	0.829	0.726	7.80677e-29	1	Phip	1.14187
Mpdz	2.5072e-33	1.52365	0.701	0.578	8.39961e-29	1	Mpdz	1.2128
Morc2b	2.74047e-33	0.766285	0.226	0.12	9.18112e-29	1	Morc2b	1.88333
Mtmr12	3.32502e-33	0.98636	0.4	0.268	1.11395e-28	1	Mtmr12	1.49254
Kdm3b	3.43991e-33	3.55269	0.641	0.514	1.15244e-28	1	Kdm3b	1.24708
Plekha71	3.98177e-33	2.55609	0.708	0.57	1.33397e-28	1	Plekha7	1.24211
St8sia6	4.56488e-33	1.26853	0.226	0.119	1.52933e-28	1	St8sia6	1.89916
Foxo3	6.80225e-33	2.14439	0.538	0.403	2.27889e-28	1	Foxo3	1.33499
Ptpn1	1.22636e-32	1.1304	0.619	0.49	4.10856e-28	1	Ptpn1	1.26327
P4ha1	1.38655e-32	1.52372	0.498	0.367	4.64523e-28	1	P4ha1	1.35695
Abca7	1.39856e-32	0.812195	0.398	0.265	4.68546e-28	1	Abca7	1.50189
Ccdc28b	1.69106e-32	0.58614	0.32	0.198	5.66538e-28	1	Ccdc28b	1.61616
Nkain1	1.90326e-32	0.644239	0.379	0.247	6.37631e-28	1	Nkain1	1.53441
Dmxl2	2.0169e-32	1.98179	0.863	0.772	6.75702e-28	1	Dmxl2	1.11788
Usp48	3.97496e-32	1.05036	0.676	0.553	1.33169e-27	1	Usp48	1.22242
Sbf2	4.21442e-32	7.15599	0.919	0.849	1.41192e-27	1	Sbf2	1.08245
Tpd52	4.78762e-32	4.64613	0.528	0.395	1.60395e-27	1	Tpd52	1.33671
Fshr	5.87542e-32	0.835099	0.125	0.05	1.96838e-27	1	Fshr	2.5
Ppp1r9b	6.45686e-32	0.700786	0.404	0.274	2.16318e-27	1	Ppp1r9b	1.47445
Fbxo41	6.68076e-32	2.61754	0.593	0.458	2.23819e-27	1	Fbxo41	1.29476
Stk39	1.51783e-31	1.00674	0.867	0.774	5.08503e-27	1	Stk39	1.12016
Fndc9	2.13751e-31	2.0173	0.606	0.485	7.16109e-27	1	Fndc9	1.24948
Plppr4	2.75866e-31	1.66181	0.78	0.666	9.24208e-27	1	Plppr4	1.17117
Kif17	2.80961e-31	2.52687	0.433	0.302	9.41276e-27	1	Kif17	1.43377
Cntrl	4.29655e-31	2.76649	0.422	0.291	1.43943e-26	1	Cntrl	1.45017
Dexi	5.13607e-31	1.21348	0.387	0.259	1.72069e-26	1	Dexi	1.49421
Gm20063	9.29202e-31	0.721556	0.166	0.078	3.11301e-26	1	Gm20063	2.12821
Pepd	1.40919e-30	0.680603	0.526	0.4	4.72106e-26	1	Pepd	1.315
Gulp11	1.7074e-30	2.31276	0.715	0.577	5.72015e-26	1	Gulp1	1.23917
Wapl	2.25533e-30	5.45877	0.724	0.618	7.55582e-26	1	Wapl	1.17152
Sobp	2.41587e-30	1.24676	0.94	0.861	8.09365e-26	1	Sobp	1.09175
Tulp3	3.20132e-30	1.01238	0.573	0.441	1.07251e-25	1	Tulp3	1.29932
C2cd2l	3.31835e-30	0.74228	0.462	0.327	1.11171e-25	1	C2cd2l	1.41284
Cntfr	3.71434e-30	1.70822	0.478	0.348	1.24438e-25	1	Cntfr	1.37356
Clock	4.18176e-30	2.20817	0.805	0.733	1.40097e-25	1	Clock	1.09823
Rgs4	4.26129e-30	0.708438	0.226	0.123	1.42762e-25	1	Rgs4	1.8374
Golga4	4.88216e-30	0.652114	0.703	0.587	1.63562e-25	1	Golga4	1.19761
Src	5.15593e-30	2.17558	0.524	0.39	1.72734e-25	1	Src	1.34359
Adap1	5.77737e-30	1.0067	0.613	0.49	1.93554e-25	1	Adap1	1.25102
Ndrg2	7.48127e-30	7.92027	0.46	0.331	2.50637e-25	1	Ndrg2	1.38973
Ctnnd1	7.49796e-30	7.88587	0.543	0.444	2.51197e-25	1	Ctnnd1	1.22297
Map3k7	7.51567e-30	0.558429	0.585	0.462	2.5179e-25	1	Map3k7	1.26623
Dync1li2	1.08562e-29	3.01808	0.692	0.587	3.63706e-25	1	Dync1li2	1.17888
Cnot10	1.25115e-29	2.19079	0.697	0.585	4.1916e-25	1	Cnot10	1.19145
Gba2	1.44908e-29	0.97475	0.353	0.231	4.85472e-25	1	Gba2	1.52814
Cln3	1.48676e-29	0.568504	0.272	0.163	4.98093e-25	1	Cln3	1.66871
Rgs3	1.58182e-29	3.89405	0.538	0.396	5.29942e-25	1	Rgs3	1.35859
Cnst	1.58754e-29	0.522133	0.518	0.388	5.31858e-25	1	Cnst	1.33505
Mapt	1.75675e-29	5.1133	0.966	0.923	5.88546e-25	1	Mapt	1.04659
Gpatch2	2.15144e-29	2.42986	0.67	0.555	7.20776e-25	1	Gpatch2	1.20721
Strada	2.56647e-29	2.75684	0.586	0.467	8.59818e-25	1	Strada	1.25482
Ttc9	2.62026e-29	0.553902	0.271	0.16	8.77841e-25	1	Ttc9	1.69375
Lrrtm2	3.68575e-29	1.19731	0.358	0.241	1.2348e-24	1	Lrrtm2	1.48548
Mfhas1	3.7322e-29	1.44319	0.556	0.429	1.25036e-24	1	Mfhas1	1.29604
Phc31	4.92758e-29	0.870847	0.734	0.641	1.65084e-24	1	Phc3	1.14509
Hectd4	5.60404e-29	4.61458	0.905	0.838	1.87747e-24	1	Hectd4	1.07995
Rskr	1.25117e-28	0.821281	0.126	0.053	4.19167e-24	1	Rskr	2.37736
Vps411	1.36836e-28	1.47944	0.763	0.661	4.58429e-24	1	Vps41	1.15431
Rab11fip5	1.63887e-28	0.602177	0.325	0.208	5.49054e-24	1	Rab11fip5	1.5625
Gm1715	2.43684e-28	0.793442	0.248	0.143	8.16389e-24	1	Gm1715	1.73427
Dcun1d2	2.66049e-28	1.04387	0.582	0.459	8.91319e-24	1	Dcun1d2	1.26797
Svil	2.71163e-28	1.61044	0.119	0.237	9.08452e-24	1	Svil	0.50211
Txndc5	3.10329e-28	0.574108	0.275	0.167	1.03966e-23	1	Txndc5	1.64671
Cds1	4.20574e-28	1.35355	0.561	0.433	1.40901e-23	1	Cds1	1.29561
Aqr	5.11954e-28	0.924649	0.525	0.392	1.71515e-23	1	Aqr	1.33929
Agap3	5.87139e-28	3.5985	0.634	0.519	1.96703e-23	1	Agap3	1.22158
Dleu2	5.93802e-28	4.28526	0.324	0.21	1.98936e-23	1	Dleu2	1.54286
Lrrtm3	6.62568e-28	10.3725	0.912	0.833	2.21974e-23	1	Lrrtm3	1.09484
Map7d1	7.36852e-28	1.29322	0.501	0.377	2.4686e-23	1	Map7d1	1.32891
Ogdh	8.268e-28	3.39565	0.78	0.683	2.76994e-23	1	Ogdh	1.14202
Atg13	1.8821e-27	1.02593	0.46	0.337	6.30541e-23	1	Atg13	1.36499
Acss2	1.88324e-27	8.71391	0.639	0.516	6.30924e-23	1	Acss2	1.23837
Acp2	2.31417e-27	1.29805	0.419	0.295	7.75293e-23	1	Acp2	1.42034
Hspa4l	2.48917e-27	2.66535	0.699	0.582	8.33921e-23	1	Hspa4l	1.20103
Sptbn2	2.52322e-27	4.63065	0.536	0.412	8.4533e-23	1	Sptbn2	1.30097
Gm49890	2.86214e-27	2.40972	0.13	0.058	9.58873e-23	1	Gm49890	2.24138
Gemin5	3.0091e-27	0.606006	0.384	0.26	1.00811e-22	1	Gemin5	1.47692
Atg4a	4.18459e-27	0.505163	0.293	0.183	1.40192e-22	1	Atg4a	1.60109
Reep3	5.32966e-27	2.42282	0.51	0.385	1.78554e-22	1	Reep3	1.32468
Pde9a	6.65292e-27	2.41469	0.63	0.489	2.22886e-22	1	Pde9a	1.28834
Syn1	6.91878e-27	6.47308	0.813	0.725	2.31793e-22	1	Syn1	1.12138
Tpm1	6.92435e-27	1.60318	0.548	0.42	2.3198e-22	1	Tpm1	1.30476
Csnk2a2	7.95249e-27	1.50259	0.6	0.483	2.66424e-22	1	Csnk2a2	1.24224
Uhrf1bp1l	8.04316e-27	1.49307	0.637	0.522	2.69462e-22	1	Uhrf1bp1l	1.22031
Cyp4x1	8.62041e-27	1.08968	0.352	0.235	2.88801e-22	1	Cyp4x1	1.49787
Trrap	8.64906e-27	3.83985	0.662	0.557	2.89761e-22	1	Trrap	1.18851
Abcd2	1.05898e-26	0.530698	0.168	0.085	3.54778e-22	1	Abcd2	1.97647
AU040320	1.08447e-26	1.71849	0.696	0.588	3.63319e-22	1	AU040320	1.18367
Mccc2	1.27236e-26	1.04271	0.524	0.396	4.26268e-22	1	Mccc2	1.32323
Susd4	2.40344e-26	7.45751	0.867	0.781	8.05199e-22	1	Susd4	1.11012
Gm1976	2.7386e-26	0.929727	0.578	0.459	9.17485e-22	1	Gm1976	1.25926
Stk25	2.78089e-26	1.46461	0.514	0.392	9.31654e-22	1	Stk25	1.31122
Ppig	2.98104e-26	3.18698	0.718	0.607	9.98709e-22	1	Ppig	1.18287
Slc12a5	2.99442e-26	6.19497	0.847	0.743	1.00319e-21	1	Slc12a5	1.13997
Nceh1	3.0603e-26	1.86795	0.709	0.591	1.02526e-21	1	Nceh1	1.19966
4933412O06Rik	3.94276e-26	0.522899	0.374	0.256	1.3209e-21	1	4933412O06Rik	1.46094
B4galt5	3.9816e-26	1.21419	0.53	0.412	1.33392e-21	1	B4galt5	1.28641
Plxdc1	4.08298e-26	3.7084	0.235	0.141	1.36788e-21	1	Plxdc1	1.66667
Las1l	4.27692e-26	0.910053	0.511	0.394	1.43286e-21	1	Las1l	1.29695
Rab12	4.51406e-26	1.76239	0.567	0.447	1.5123e-21	1	Rab12	1.26846
Tfdp2	4.53535e-26	3.26186	0.631	0.51	1.51943e-21	1	Tfdp2	1.23725
Commd10	5.70977e-26	2.24435	0.576	0.461	1.91289e-21	1	Commd10	1.24946
Pex7	6.10923e-26	0.921871	0.352	0.237	2.04671e-21	1	Pex7	1.48523
Klf6	6.80748e-26	0.680146	0.387	0.272	2.28064e-21	1	Klf6	1.42279
Dync1i1	7.4753e-26	3.68486	0.927	0.872	2.50438e-21	1	Dync1i1	1.06307
Zkscan3	9.53528e-26	1.8225	0.498	0.385	3.19451e-21	1	Zkscan3	1.29351
Mark3	1.06268e-25	2.98068	0.844	0.765	3.56019e-21	1	Mark3	1.10327
Wipf2	1.18415e-25	1.5653	0.517	0.395	3.96713e-21	1	Wipf2	1.30886
Plxdc2	1.35526e-25	8.45533	0.581	0.472	4.54038e-21	1	Plxdc2	1.23093
Sil1	2.46936e-25	2.26905	0.631	0.515	8.27286e-21	1	Sil1	1.22524
Ttyh1	5.08889e-25	3.6508	0.789	0.682	1.70488e-20	1	Ttyh1	1.15689
Actr1b	5.11123e-25	1.00489	0.569	0.452	1.71236e-20	1	Actr1b	1.25885
Lca51	5.64464e-25	1.12963	0.548	0.428	1.89107e-20	1	Lca5	1.28037
Ncdn	7.28373e-25	1.5113	0.592	0.483	2.4402e-20	1	Ncdn	1.22567
Ppp2r2c	8.46614e-25	7.19291	0.713	0.606	2.83632e-20	1	Ppp2r2c	1.17657
Eml2	9.83692e-25	4.85192	0.663	0.56	3.29557e-20	1	Eml2	1.18393
Hcn4	1.00497e-24	0.658813	0.305	0.199	3.36686e-20	1	Hcn4	1.53266
Usp7	1.10301e-24	1.64643	0.631	0.527	3.69531e-20	1	Usp7	1.19734
Camkk2	1.3797e-24	1.20725	0.457	0.34	4.62226e-20	1	Camkk2	1.34412
Crim1	1.44054e-24	10.4411	0.739	0.623	4.82611e-20	1	Crim1	1.1862
Car11	1.53369e-24	0.943284	0.497	0.381	5.13818e-20	1	Car11	1.30446
Cd46	1.73015e-24	1.03711	0.704	0.591	5.79636e-20	1	Cd46	1.1912
Scn1b	1.80887e-24	0.933588	0.54	0.426	6.06008e-20	1	Scn1b	1.26761
Pcdh1	1.84588e-24	0.57571	0.502	0.374	6.18406e-20	1	Pcdh1	1.34225
Ankrd24	1.94595e-24	1.06158	0.624	0.512	6.51932e-20	1	Ankrd24	1.21875
Rab30	2.20181e-24	0.730987	0.652	0.539	7.37651e-20	1	Rab30	1.20965
Fam185a	2.73501e-24	4.51189	0.484	0.367	9.16283e-20	1	Fam185a	1.3188
Snx25	2.971e-24	1.6109	0.578	0.46	9.95345e-20	1	Snx25	1.25652
Rimkla	3.51483e-24	1.15213	0.416	0.303	1.17754e-19	1	Rimkla	1.37294
Lrrc8b	4.69942e-24	0.593166	0.398	0.284	1.5744e-19	1	Lrrc8b	1.40141
Cacna1d	5.67036e-24	5.3106	0.973	0.947	1.89968e-19	1	Cacna1d	1.02746
Fancm	5.83929e-24	1.30141	0.358	0.246	1.95628e-19	1	Fancm	1.45528
Kras	6.02554e-24	2.48267	0.507	0.393	2.01868e-19	1	Kras	1.29008
Myo3b	6.86667e-24	1.46157	0.207	0.118	2.30047e-19	1	Myo3b	1.75424
Tmem38a	7.19415e-24	0.771262	0.564	0.457	2.41018e-19	1	Tmem38a	1.23414
Tet2	7.59899e-24	0.75046	0.54	0.417	2.54581e-19	1	Tet2	1.29496
Map3k3	8.53475e-24	3.18487	0.693	0.586	2.85931e-19	1	Map3k3	1.18259
Adamts19	8.85198e-24	2.73602	0.121	0.055	2.96559e-19	1	Adamts19	2.2
Sprn	9.42914e-24	0.509278	0.251	0.156	3.15895e-19	1	Sprn	1.60897
Ypel4	1.00151e-23	0.52295	0.306	0.201	3.35525e-19	1	Ypel4	1.52239
Tlk1	1.00173e-23	1.68637	0.658	0.558	3.35601e-19	1	Tlk1	1.17921
Setd5	1.39912e-23	10.9839	0.862	0.8	4.68733e-19	1	Setd5	1.0775
Lmbr1	1.9461e-23	1.87897	0.745	0.662	6.51982e-19	1	Lmbr1	1.12538
Ptp4a2	2.01121e-23	2.30889	0.522	0.406	6.73796e-19	1	Ptp4a2	1.28571
Disc1	2.14244e-23	0.6205	0.243	0.149	7.1776e-19	1	Disc1	1.63087
Gm28822	2.25965e-23	0.711711	0.302	0.196	7.57027e-19	1	Gm28822	1.54082
Tom1	2.40986e-23	2.05474	0.45	0.341	8.07352e-19	1	Tom1	1.31965
Znrf31	3.02584e-23	2.01935	0.718	0.602	1.01372e-18	1	Znrf3	1.19269
Ap3d1	3.167e-23	2.56776	0.619	0.514	1.06101e-18	1	Ap3d1	1.20428
Abca5	3.18975e-23	3.51152	0.646	0.538	1.06863e-18	1	Abca5	1.20074
Hnrnpdl	4.87449e-23	4.02546	0.676	0.578	1.63305e-18	1	Hnrnpdl	1.16955
Pkd1	4.9878e-23	2.83088	0.711	0.617	1.67101e-18	1	Pkd1	1.15235
Tmem191c	5.30007e-23	5.69214	0.706	0.616	1.77563e-18	1	Tmem191c	1.1461
Adgrb2	5.32852e-23	2.64869	0.597	0.477	1.78516e-18	1	Adgrb2	1.25157
Arhgap12	5.78482e-23	2.98741	0.656	0.554	1.93803e-18	1	Arhgap12	1.18412
Actn1	7.34837e-23	0.501833	0.469	0.35	2.46185e-18	1	Actn1	1.34
Ahsa2	7.56193e-23	0.510852	0.42	0.308	2.5334e-18	1	Ahsa2	1.36364
Rab4a	8.79867e-23	0.64449	0.272	0.177	2.94773e-18	1	Rab4a	1.53672
Hdx	8.91718e-23	1.1122	0.622	0.507	2.98743e-18	1	Hdx	1.22682
Gm17167	1.07389e-22	1.02815	0.25	0.157	3.59774e-18	1	Gm17167	1.59236
Adam9	1.10775e-22	1.22985	0.481	0.372	3.71119e-18	1	Adam9	1.29301
Slc45a4	1.11175e-22	0.864246	0.377	0.269	3.72457e-18	1	Slc45a4	1.40149
Ap1b1	1.16885e-22	6.30123	0.611	0.507	3.91586e-18	1	Ap1b1	1.20513
Wdfy3	1.29207e-22	3.68197	0.936	0.904	4.32869e-18	1	Wdfy3	1.0354
Ube4b	1.39206e-22	10.7744	0.801	0.719	4.66368e-18	1	Ube4b	1.11405
Sfswap	2.07123e-22	2.14899	0.653	0.55	6.93904e-18	1	Sfswap	1.18727
Neto2	2.19987e-22	2.50125	0.476	0.361	7.37e-18	1	Neto2	1.31856
Cd2ap	2.27472e-22	4.01998	0.675	0.576	7.62078e-18	1	Cd2ap	1.17188
Ppfia3	2.30307e-22	1.10025	0.51	0.395	7.71575e-18	1	Ppfia3	1.29114
Erc1	3.68745e-22	2.22519	0.864	0.807	1.23537e-17	1	Erc1	1.07063
Snx7	5.16137e-22	1.45629	0.327	0.226	1.72916e-17	1	Snx7	1.4469
Ubr2	5.74376e-22	1.77217	0.689	0.593	1.92427e-17	1	Ubr2	1.16189
Tpp2	6.08116e-22	2.75472	0.62	0.516	2.03731e-17	1	Tpp2	1.20155
Cdc42ep3	6.78457e-22	0.625339	0.26	0.166	2.27297e-17	1	Cdc42ep3	1.56627
Aplp2	6.87025e-22	3.47999	0.891	0.836	2.30167e-17	1	Aplp2	1.06579
Nudt4	7.83447e-22	0.668957	0.301	0.201	2.6247e-17	1	Nudt4	1.49751
Kif5a	9.89427e-22	5.50351	0.862	0.793	3.31478e-17	1	Kif5a	1.08701
Pdzd4	1.02599e-21	5.12637	0.771	0.691	3.43728e-17	1	Pdzd4	1.11577
Dctn2	1.03728e-21	1.70138	0.505	0.398	3.47508e-17	1	Dctn2	1.26884
Nhlrc2	1.89103e-21	0.703748	0.431	0.321	6.33533e-17	1	Nhlrc2	1.34268
Prkdc	1.90441e-21	3.16803	0.683	0.572	6.38014e-17	1	Prkdc	1.19406
Gpr162	1.95545e-21	0.72033	0.464	0.356	6.55116e-17	1	Gpr162	1.30337
Zmym2	2.867e-21	2.24686	0.78	0.706	9.60503e-17	1	Zmym2	1.10482
Rictor	2.93965e-21	1.54341	0.695	0.606	9.84841e-17	1	Rictor	1.14686
Limk2	3.75677e-21	3.56852	0.516	0.411	1.25859e-16	1	Limk2	1.25547
Abhd18	3.77501e-21	3.4709	0.777	0.722	1.26471e-16	1	Abhd18	1.07618
Gm14377	4.01532e-21	0.768905	0.245	0.155	1.34521e-16	1	Gm14377	1.58065
Otud7b	4.31074e-21	1.30558	0.562	0.459	1.44419e-16	1	Otud7b	1.2244
Agtpbp1	6.11449e-21	3.30958	0.822	0.747	2.04848e-16	1	Agtpbp1	1.1004
Tango2	6.48833e-21	4.42964	0.676	0.565	2.17372e-16	1	Tango2	1.19646
Rbm24	7.92057e-21	0.716387	0.387	0.282	2.65355e-16	1	Rbm24	1.37234
Szt2	8.04231e-21	0.670635	0.314	0.214	2.69433e-16	1	Szt2	1.46729
Lrrc40	8.10736e-21	0.996522	0.465	0.353	2.71613e-16	1	Lrrc40	1.31728
Acot7	8.15316e-21	5.01557	0.754	0.671	2.73147e-16	1	Acot7	1.1237
Fscn1	8.63906e-21	0.568184	0.266	0.173	2.89426e-16	1	Fscn1	1.53757
Sec22a	9.38786e-21	2.0355	0.559	0.452	3.14512e-16	1	Sec22a	1.23673
Tmem110	1.07024e-20	1.33471	0.188	0.109	3.5855e-16	1	Tmem110	1.72477
1700123M08Rik	1.1206e-20	1.52097	0.293	0.202	3.75424e-16	1	1700123M08Rik	1.4505
Akap10	1.1435e-20	3.39372	0.637	0.547	3.83095e-16	1	Akap10	1.16453
Parl	1.2743e-20	0.527691	0.474	0.369	4.26917e-16	1	Parl	1.28455
Gm38393	1.29563e-20	0.810525	0.659	0.563	4.34062e-16	1	Gm38393	1.17052
Rb1	1.40776e-20	2.6915	0.729	0.638	4.71628e-16	1	Rb1	1.14263
1700111E14Rik	1.77194e-20	2.15455	0.746	0.639	5.93634e-16	1	1700111E14Rik	1.16745
Trim3	2.17726e-20	0.725765	0.547	0.438	7.29427e-16	1	Trim3	1.24886
Slc30a9	2.41313e-20	1.80307	0.676	0.58	8.08445e-16	1	Slc30a9	1.16552
Raf11	2.45601e-20	1.15962	0.728	0.632	8.22811e-16	1	Raf1	1.1519
Ddx10	2.76469e-20	2.48381	0.681	0.571	9.26227e-16	1	Ddx10	1.19264
Tbc1d9b	3.23833e-20	1.35463	0.575	0.478	1.0849e-15	1	Tbc1d9b	1.20293
Dcaf5	3.42376e-20	0.866804	0.759	0.666	1.14703e-15	1	Dcaf5	1.13964
Riok3	3.49876e-20	0.567472	0.688	0.6	1.17215e-15	1	Riok3	1.14667
Lynx1	3.57216e-20	0.733793	0.383	0.276	1.19674e-15	1	Lynx1	1.38768
Grem2	3.64176e-20	0.635106	0.311	0.213	1.22006e-15	1	Grem2	1.46009
Lrrc45	3.72501e-20	0.55255	0.418	0.313	1.24795e-15	1	Lrrc45	1.33546
2023-09-08	3.81669e-20	0.92256	0.439	0.332	1.27867e-15	1	2023-09-08	1.32229
Sema6b	4.14223e-20	0.613825	0.429	0.325	1.38773e-15	1	Sema6b	1.32
Nfx1	4.18027e-20	2.781	0.761	0.685	1.40047e-15	1	Nfx1	1.11095
Osbpl9	4.76091e-20	1.96046	0.886	0.843	1.595e-15	1	Osbpl9	1.05101
Fbxl5	5.27094e-20	1.5975	0.635	0.546	1.76587e-15	1	Fbxl5	1.163
Tacc1	6.02701e-20	0.721579	0.606	0.509	2.01917e-15	1	Tacc1	1.19057
Cnot1	6.61607e-20	3.62366	0.712	0.619	2.21652e-15	1	Cnot1	1.15024
Helq	8.01042e-20	0.512477	0.396	0.29	2.68365e-15	1	Helq	1.36552
Gm15336	1.05351e-19	0.524687	0.209	0.312	3.52947e-15	1	Gm15336	0.669872
Slc39a14	1.09843e-19	1.38566	0.373	0.272	3.67997e-15	1	Slc39a14	1.37132
Lemd2	1.21388e-19	0.546265	0.344	0.245	4.06676e-15	1	Lemd2	1.40408
Zc3h7a	1.44163e-19	1.07039	0.672	0.579	4.82975e-15	1	Zc3h7a	1.16062
Ano5	1.88532e-19	10.9829	0.751	0.641	6.3162e-15	1	Ano5	1.17161
2310035C23Rik	2.19948e-19	1.719	0.282	0.196	7.3687e-15	1	2310035C23Rik	1.43878
Mkln1	2.28762e-19	2.23233	0.773	0.698	7.66397e-15	1	Mkln1	1.10745
Ltn1	2.36349e-19	0.621111	0.523	0.412	7.91815e-15	1	Ltn1	1.26942
Cadm4	2.44687e-19	0.855454	0.325	0.231	8.1975e-15	1	Cadm4	1.40693
Ckmt1	2.48886e-19	0.59987	0.359	0.262	8.33817e-15	1	Ckmt1	1.37023
Plppr1	2.56207e-19	4.95831	0.742	0.659	8.58345e-15	1	Plppr1	1.12595
Dlg3	2.73205e-19	1.05369	0.396	0.293	9.15293e-15	1	Dlg3	1.35154
Senp51	2.9057e-19	0.596073	0.661	0.573	9.73468e-15	1	Senp5	1.15358
Eif2b3	2.9228e-19	0.516109	0.457	0.355	9.79195e-15	1	Eif2b3	1.28732
Fam76b	3.19721e-19	0.703035	0.42	0.316	1.07113e-14	1	Fam76b	1.32911
Mink1	3.4868e-19	1.48047	0.53	0.422	1.16815e-14	1	Mink1	1.25592
Gm15594	3.88073e-19	0.615642	0.478	0.373	1.30012e-14	1	Gm15594	1.2815
Laptm4b	4.20729e-19	0.581572	0.172	0.1	1.40953e-14	1	Laptm4b	1.72
Edem3	4.32168e-19	1.32356	0.557	0.456	1.44785e-14	1	Edem3	1.22149
4430402I18Rik	4.45638e-19	0.908614	0.513	0.411	1.49298e-14	1	4430402I18Rik	1.24818
Foxk2	4.75768e-19	0.700548	0.575	0.474	1.59392e-14	1	Foxk2	1.21308
Cpne7	5.61894e-19	9.42679	0.577	0.518	1.88246e-14	1	Cpne7	1.1139
Gm26859	6.28696e-19	0.537026	0.165	0.094	2.10626e-14	1	Gm26859	1.75532
Faf1	6.37919e-19	4.8906	0.875	0.828	2.13716e-14	1	Faf1	1.05676
Zer1	6.55131e-19	2.39738	0.511	0.419	2.19482e-14	1	Zer1	1.21957
Tmem87a	6.72368e-19	0.747838	0.56	0.464	2.25257e-14	1	Tmem87a	1.2069
Gigyf1	6.95404e-19	1.24213	0.414	0.311	2.32974e-14	1	Gigyf1	1.33119
Kmt2d	7.20757e-19	0.843567	0.424	0.32	2.41468e-14	1	Kmt2d	1.325
9330182L06Rik	7.44302e-19	0.67737	0.802	0.717	2.49356e-14	1	9330182L06Rik	1.11855
Klhl3	9.57636e-19	0.958162	0.604	0.503	3.20827e-14	1	Klhl3	1.2008
Impa1	1.05038e-18	0.570922	0.308	0.213	3.51899e-14	1	Impa1	1.44601
Rin2	1.11894e-18	2.05873	0.265	0.176	3.74866e-14	1	Rin2	1.50568
Atl2	1.1405e-18	0.53988	0.422	0.322	3.8209e-14	1	Atl2	1.31056
Lin28b	1.40225e-18	2.79678	0.804	0.719	4.69783e-14	1	Lin28b	1.11822
Srrt	1.50332e-18	1.05773	0.506	0.408	5.03643e-14	1	Srrt	1.2402
Hacd2	1.61865e-18	0.979451	0.548	0.441	5.42281e-14	1	Hacd2	1.24263
Osbpl101	1.94078e-18	0.546553	0.703	0.617	6.50201e-14	1	Osbpl10	1.13938
Iffo1	2.12682e-18	0.574268	0.421	0.319	7.12528e-14	1	Iffo1	1.31975
Trappc3	2.16236e-18	0.584253	0.403	0.301	7.24433e-14	1	Trappc3	1.33887
Dnajc13	2.29569e-18	1.82238	0.726	0.628	7.69103e-14	1	Dnajc13	1.15605
Safb	2.29776e-18	2.39547	0.609	0.503	7.69797e-14	1	Safb	1.21074
Gm47283	2.50132e-18	12.2463	0.664	0.582	8.37993e-14	1	Gm47283	1.14089
Stx5a	3.0412e-18	0.716985	0.611	0.52	1.01886e-13	1	Stx5a	1.175
Zfp445	3.15215e-18	2.97718	0.734	0.655	1.05603e-13	1	Zfp445	1.12061
Efnb2	3.188e-18	0.540367	0.228	0.146	1.06804e-13	1	Efnb2	1.56164
Pde3b	3.34181e-18	1.71208	0.497	0.399	1.11957e-13	1	Pde3b	1.24561
Camta2	3.5899e-18	0.567426	0.399	0.301	1.20269e-13	1	Camta2	1.32558
H13	3.66264e-18	0.948616	0.451	0.551	1.22706e-13	1	H13	0.818512
Usp33	4.59474e-18	0.626596	0.734	0.655	1.53933e-13	1	Usp33	1.12061
E330018M18Rik	5.01977e-18	1.48198	0.23	0.149	1.68172e-13	1	E330018M18Rik	1.54362
Junos	5.39547e-18	1.30748	0.193	0.118	1.80759e-13	1	Junos	1.63559
Eps8l1	6.94523e-18	2.05618	0.252	0.167	2.32679e-13	1	Eps8l1	1.50898
Pik3cd	7.31247e-18	0.505403	0.23	0.149	2.44982e-13	1	Pik3cd	1.54362
Med15	7.31958e-18	2.34164	0.546	0.452	2.45221e-13	1	Med15	1.20796
B4galnt4	7.36182e-18	0.614123	0.451	0.353	2.46636e-13	1	B4galnt4	1.27762
Mcf2l	7.4914e-18	1.62947	0.714	0.623	2.50977e-13	1	Mcf2l	1.14607
Cdk5r1	8.27998e-18	0.965	0.448	0.354	2.77396e-13	1	Cdk5r1	1.26554
Ascc2	8.44641e-18	1.33401	0.511	0.406	2.82972e-13	1	Ascc2	1.25862
Gnb5	8.53995e-18	0.547357	0.509	0.41	2.86105e-13	1	Gnb5	1.24146
Plch1	9.12286e-18	4.53507	0.282	0.195	3.05634e-13	1	Plch1	1.44615
Mff	1.01662e-17	1.76059	0.586	0.49	3.40587e-13	1	Mff	1.19592
Lrp1	1.1018e-17	6.72039	0.617	0.524	3.69124e-13	1	Lrp1	1.17748
St8sia5	1.4449e-17	0.848141	0.227	0.147	4.84072e-13	1	St8sia5	1.54422
Pus10	1.745e-17	1.79707	0.556	0.451	5.84611e-13	1	Pus10	1.23282
Lrig2	2.12642e-17	0.69144	0.628	0.541	7.12393e-13	1	Lrig2	1.16081
Glb1	2.24845e-17	0.567825	0.454	0.353	7.53277e-13	1	Glb1	1.28612
Gripap1	2.51919e-17	1.18164	0.621	0.536	8.4398e-13	1	Gripap1	1.15858
Dync1li1	3.36624e-17	5.09403	0.672	0.58	1.12776e-12	1	Dync1li1	1.15862
Sh3glb2	3.53025e-17	0.922346	0.626	0.535	1.18271e-12	1	Sh3glb2	1.17009
Rab31	3.71649e-17	8.77856	0.426	0.333	1.2451e-12	1	Rab31	1.27928
Inpp5k	4.37826e-17	0.754172	0.344	0.253	1.4668e-12	1	Inpp5k	1.35968
Rgs17	4.42421e-17	5.16561	0.825	0.748	1.4822e-12	1	Rgs17	1.10294
Miga1	4.48645e-17	7.95881	0.641	0.548	1.50305e-12	1	Miga1	1.16971
Ift140	4.97969e-17	0.894626	0.319	0.23	1.6683e-12	1	Ift140	1.38696
1700080N15Rik	5.00709e-17	0.879466	0.424	0.33	1.67748e-12	1	1700080N15Rik	1.28485
Dnm1l	5.40705e-17	1.71007	0.767	0.693	1.81147e-12	1	Dnm1l	1.10678
Strn4	8.37197e-17	0.704277	0.502	0.402	2.80478e-12	1	Strn4	1.24876
Zfp941	8.79394e-17	0.666025	0.526	0.424	2.94614e-12	1	Zfp941	1.24057
Mrs2	9.02372e-17	1.11643	0.412	0.319	3.02313e-12	1	Mrs2	1.29154
Usp32	9.41054e-17	0.863607	0.801	0.746	3.15272e-12	1	Usp32	1.07373
Aldh7a1	9.59026e-17	0.603825	0.382	0.291	3.21293e-12	1	Aldh7a1	1.31271
Timp3	1.01311e-16	7.93542	0.851	0.787	3.39412e-12	1	Timp3	1.08132
Sun2	1.03965e-16	0.514312	0.195	0.122	3.48303e-12	1	Sun2	1.59836
Zfp638	1.08873e-16	8.61765	0.87	0.819	3.64745e-12	1	Zfp638	1.06227
Taf2	1.14086e-16	1.35954	0.435	0.335	3.8221e-12	1	Taf2	1.29851
Mau2	1.23268e-16	2.37139	0.556	0.462	4.12971e-12	1	Mau2	1.20346
Brsk1	1.28664e-16	0.763827	0.484	0.388	4.3105e-12	1	Brsk1	1.24742
Dip2a	1.30622e-16	3.5138	0.6	0.504	4.37611e-12	1	Dip2a	1.19048
Myo9b	1.41793e-16	2.62763	0.596	0.509	4.75035e-12	1	Myo9b	1.17092
Atp13a2	1.49113e-16	1.19897	0.482	0.389	4.99559e-12	1	Atp13a2	1.23907
Col4a2	1.68926e-16	0.596387	0.439	0.342	5.65935e-12	1	Col4a2	1.28363
Arl5a	1.75934e-16	0.587846	0.357	0.264	5.89414e-12	1	Arl5a	1.35227
Mgea5	1.76149e-16	2.62184	0.295	0.217	5.90135e-12	1	Mgea5	1.35945
Gm4793	1.89953e-16	0.546374	0.195	0.122	6.3638e-12	1	Gm4793	1.59836
Zfc3h1	1.91281e-16	1.19922	0.621	0.53	6.4083e-12	1	Zfc3h1	1.1717
Cthrc1	2.02311e-16	0.844989	0.393	0.298	6.77783e-12	1	Cthrc1	1.31879
Pitpnm3	2.59731e-16	3.35729	0.668	0.587	8.70151e-12	1	Pitpnm3	1.13799
Arhgef7	2.61194e-16	5.81805	0.723	0.641	8.75053e-12	1	Arhgef7	1.12793
Stt3b	2.80975e-16	1.42551	0.54	0.448	9.41321e-12	1	Stt3b	1.20536
Pitpnm1	3.02082e-16	1.20556	0.506	0.42	1.01203e-11	1	Pitpnm1	1.20476
Tox2	3.13448e-16	2.98017	0.689	0.595	1.05011e-11	1	Tox2	1.15798
Fnbp4	3.23325e-16	1.73922	0.589	0.491	1.0832e-11	1	Fnbp4	1.19959
Gm47271	3.33279e-16	0.701901	0.388	0.492	1.11655e-11	1	Gm47271	0.788618
Gnpat	3.41005e-16	1.38763	0.43	0.333	1.14244e-11	1	Gnpat	1.29129
Sec31a	3.48254e-16	0.632055	0.441	0.344	1.16672e-11	1	Sec31a	1.28198
Atxn2l	3.6222e-16	0.87065	0.576	0.485	1.21351e-11	1	Atxn2l	1.18763
Lrch2	4.51118e-16	1.76431	0.548	0.456	1.51134e-11	1	Lrch2	1.20175
Rbm28	5.09391e-16	1.57519	0.6	0.506	1.70656e-11	1	Rbm28	1.18577
Gm47027	5.21815e-16	0.523378	0.177	0.109	1.74818e-11	1	Gm47027	1.62385
Sppl2b	5.3104e-16	0.540695	0.257	0.177	1.77909e-11	1	Sppl2b	1.45198
Baz1b	5.64986e-16	8.45118	0.724	0.655	1.89282e-11	1	Baz1b	1.10534
Prepl	6.00298e-16	0.747608	0.587	0.494	2.01112e-11	1	Prepl	1.18826
Cdkl1	6.45867e-16	0.704643	0.581	0.481	2.16379e-11	1	Cdkl1	1.2079
9330198N18Rik	7.26828e-16	0.682328	0.215	0.141	2.43502e-11	1	9330198N18Rik	1.52482
Pnpt1	7.56343e-16	0.657846	0.535	0.439	2.5339e-11	1	Pnpt1	1.21868
Kifap3	9.02089e-16	1.35717	0.864	0.81	3.02218e-11	1	Kifap3	1.06667
Rab10os	9.68347e-16	0.675855	0.403	0.315	3.24416e-11	1	Rab10os	1.27937
Nav1	1.02239e-15	2.15681	0.91	0.814	3.42522e-11	1	Nav1	1.11794
Iqce	1.03799e-15	2.87407	0.583	0.487	3.47746e-11	1	Iqce	1.19713
Coro6	1.23663e-15	1.54446	0.297	0.21	4.14295e-11	1	Coro6	1.41429
Zswim8	1.25568e-15	0.797436	0.51	0.42	4.20678e-11	1	Zswim8	1.21429
4930408O17Rik	1.26737e-15	4.93096	0.123	0.068	4.24594e-11	1	4930408O17Rik	1.80882
Fxr2	1.34077e-15	0.749659	0.468	0.372	4.49186e-11	1	Fxr2	1.25806
Hspa14	1.40256e-15	0.516522	0.351	0.262	4.69886e-11	1	Hspa14	1.33969
Ric1	1.4149e-15	0.580598	0.49	0.395	4.7402e-11	1	Ric1	1.24051
Ttll4	1.52871e-15	0.808293	0.337	0.25	5.12147e-11	1	Ttll4	1.348
Atxn7	1.66974e-15	0.502981	0.669	0.586	5.59396e-11	1	Atxn7	1.14164
Sugp1	1.83954e-15	0.51948	0.524	0.433	6.16284e-11	1	Sugp1	1.21016
Cog2	1.83992e-15	0.569701	0.309	0.223	6.16411e-11	1	Cog2	1.38565
Papd4	1.91407e-15	0.781101	0.2	0.131	6.41253e-11	1	Papd4	1.52672
Esf1	1.94415e-15	1.01908	0.556	0.467	6.51329e-11	1	Esf1	1.19058
Araf	2.05193e-15	3.83807	0.514	0.606	6.87437e-11	1	Araf	0.848185
Sirt7	2.16155e-15	0.995997	0.453	0.363	7.24162e-11	1	Sirt7	1.24793
Ccnt1	2.58302e-15	0.752063	0.547	0.463	8.65364e-11	1	Ccnt1	1.18143
Rptor	2.90394e-15	0.674395	0.8	0.736	9.72877e-11	1	Rptor	1.08696
Fbxo8	3.35992e-15	0.720013	0.502	0.412	1.12564e-10	1	Fbxo8	1.21845
2810403A07Rik	3.94914e-15	2.10672	0.191	0.123	1.32304e-10	1	2810403A07Rik	1.55285
Mrps5	4.09807e-15	1.01039	0.52	0.429	1.37293e-10	1	Mrps5	1.21212
Ints10	4.30432e-15	0.821487	0.557	0.47	1.44203e-10	1	Ints10	1.18511
Fbxo3	4.43803e-15	1.87592	0.622	0.537	1.48683e-10	1	Fbxo3	1.15829
Znfx1	4.84198e-15	0.766249	0.296	0.212	1.62216e-10	1	Znfx1	1.39623
Rft1	4.88319e-15	1.19666	0.25	0.173	1.63596e-10	1	Rft1	1.44509
Tmem63b	5.72308e-15	3.47619	0.728	0.653	1.91735e-10	1	Tmem63b	1.11485
Ccm2	5.77333e-15	0.733843	0.436	0.347	1.93418e-10	1	Ccm2	1.25648
Ap4s1	6.38854e-15	1.31409	0.469	0.384	2.14029e-10	1	Ap4s1	1.22135
Scaf4	6.64908e-15	0.993993	0.565	0.478	2.22757e-10	1	Scaf4	1.18201
Mroh1	6.98152e-15	1.27992	0.489	0.402	2.33895e-10	1	Mroh1	1.21642
Xpo6	8.08307e-15	0.768461	0.628	0.547	2.70799e-10	1	Xpo6	1.14808
Dopey1	8.13658e-15	1.86645	0.278	0.206	2.72592e-10	1	Dopey1	1.34951
Crtac1	8.76756e-15	0.588472	0.367	0.283	2.93731e-10	1	Crtac1	1.29682
9330159F19Rik	9.72262e-15	3.35164	0.702	0.621	3.25727e-10	1	9330159F19Rik	1.13043
Adam22	1.02045e-14	4.64975	0.924	0.89	3.41871e-10	1	Adam22	1.0382
Celsr3	1.07981e-14	1.20707	0.375	0.288	3.61759e-10	1	Celsr3	1.30208
Dnmbp	1.13525e-14	2.06178	0.431	0.343	3.80332e-10	1	Dnmbp	1.25656
Sec23ip	1.52739e-14	0.749993	0.309	0.225	5.11708e-10	1	Sec23ip	1.37333
Ankhd1	1.58497e-14	2.02918	0.778	0.721	5.30996e-10	1	Ankhd1	1.07906
2610507B11Rik	1.84579e-14	0.803922	0.519	0.432	6.18377e-10	1	2610507B11Rik	1.20139
Hook3	1.86252e-14	0.864877	0.801	0.734	6.2398e-10	1	Hook3	1.09128
Gm49353	1.88527e-14	1.28565	0.228	0.158	6.31603e-10	1	Gm49353	1.44304
Btbd3	2.10042e-14	3.92465	0.599	0.512	7.03683e-10	1	Btbd3	1.16992
Ube2o	2.18427e-14	1.6376	0.59	0.506	7.31774e-10	1	Ube2o	1.16601
Flii	2.27583e-14	0.642362	0.393	0.311	7.62449e-10	1	Flii	1.26367
Apip	2.2913e-14	0.594522	0.282	0.203	7.67633e-10	1	Apip	1.38916
Akap17b	2.40931e-14	0.694589	0.554	0.463	8.07166e-10	1	Akap17b	1.19654
Nbas1	2.67622e-14	1.76187	0.716	0.634	8.96589e-10	1	Nbas	1.12934
Lrrcc1	2.69939e-14	2.1771	0.492	0.401	9.04348e-10	1	Lrrcc1	1.22693
Micu1	2.77003e-14	0.987033	0.568	0.483	9.28016e-10	1	Micu1	1.17598
Ttc4	3.1284e-14	0.907193	0.464	0.375	1.04808e-09	1	Ttc4	1.23733
Pptc7	3.62128e-14	0.605827	0.491	0.403	1.2132e-09	1	Pptc7	1.21836
Grina	3.66772e-14	1.34009	0.75	0.7	1.22876e-09	1	Grina	1.07143
Papd5	3.73473e-14	1.82639	0.212	0.144	1.25121e-09	1	Papd5	1.47222
Parp6	3.99567e-14	0.734776	0.556	0.472	1.33863e-09	1	Parp6	1.17797
Aven	5.26692e-14	0.657394	0.284	0.205	1.76452e-09	1	Aven	1.38537
Tbc1d19	5.78679e-14	0.546663	0.669	0.589	1.93869e-09	1	Tbc1d19	1.13582
Smg7	6.44625e-14	2.1241	0.652	0.577	2.15962e-09	1	Smg7	1.12998
Hectd2	6.62829e-14	0.743828	0.296	0.216	2.22061e-09	1	Hectd2	1.37037
Dennd4a	7.06625e-14	0.613056	0.74	0.686	2.36733e-09	1	Dennd4a	1.07872
Kif5c	7.09498e-14	3.33006	0.867	0.81	2.37696e-09	1	Kif5c	1.07037
Clec16a	7.4472e-14	1.89228	0.715	0.644	2.49496e-09	1	Clec16a	1.11025
Ncoa6	7.83969e-14	0.61441	0.684	0.601	2.62645e-09	1	Ncoa6	1.1381
Pakap	8.87371e-14	2.50723	0.645	0.569	2.97287e-09	1	Pakap	1.13357
Ddx46	9.08168e-14	1.71678	0.659	0.58	3.04254e-09	1	Ddx46	1.13621
Ggt7	9.63193e-14	2.20807	0.682	0.61	3.22689e-09	1	Ggt7	1.11803
Ptpn9	9.78649e-14	1.37009	0.627	0.55	3.27867e-09	1	Ptpn9	1.14
Ap1s1	9.82848e-14	2.0043	0.297	0.22	3.29274e-09	1	Ap1s1	1.35
Setd3	1.16465e-13	0.669799	0.626	0.55	3.90182e-09	1	Setd3	1.13818
Acin1	1.28268e-13	2.1178	0.733	0.671	4.29723e-09	1	Acin1	1.0924
Itgbl1	1.3126e-13	1.19527	0.255	0.182	4.39748e-09	1	Itgbl1	1.4011
Ubap2l	1.35463e-13	1.78914	0.717	0.64	4.53828e-09	1	Ubap2l	1.12031
Ercc6l2	1.52135e-13	3.97536	0.465	0.384	5.09684e-09	1	Ercc6l2	1.21094
Anxa7	1.56607e-13	0.520661	0.396	0.314	5.24663e-09	1	Anxa7	1.26115
Gcn1l1	1.58735e-13	0.516355	0.173	0.113	5.31793e-09	1	Gcn1l1	1.53097
Usp16	1.7524e-13	3.64503	0.549	0.461	5.87089e-09	1	Usp16	1.19089
Map4k5	1.76521e-13	0.712492	0.677	0.602	5.91379e-09	1	Map4k5	1.12458
Snapc3	1.93242e-13	2.18716	0.614	0.539	6.47398e-09	1	Snapc3	1.13915
2023-03-03	1.9676e-13	1.66979	0.827	0.707	6.59184e-09	1	2023-03-03	1.16973
Gbe1	2.06426e-13	0.740577	0.237	0.164	6.91569e-09	1	Gbe1	1.44512
Gm19938	2.07714e-13	1.93179	0.444	0.375	6.95883e-09	1	Gm19938	1.184
Tox4	2.0876e-13	1.53407	0.473	0.391	6.99389e-09	1	Tox4	1.20972
Spen	2.10595e-13	1.05763	0.539	0.452	7.05536e-09	1	Spen	1.19248
Ccdc58	2.20395e-13	0.668613	0.428	0.346	7.38368e-09	1	Ccdc58	1.23699
Fbxw11	2.22332e-13	3.9474	0.667	0.587	7.44858e-09	1	Fbxw11	1.13629
Csde1	2.31224e-13	0.894869	0.626	0.547	7.74646e-09	1	Csde1	1.14442
Dopey2	2.34712e-13	1.80982	0.222	0.155	7.86333e-09	1	Dopey2	1.43226
9030624J02Rik	2.53411e-13	7.14415	0.212	0.148	8.48979e-09	1	9030624J02Rik	1.43243
Cpsf7	2.66935e-13	0.974905	0.559	0.485	8.94287e-09	1	Cpsf7	1.15258
Zfp322a	2.82274e-13	0.6058	0.453	0.37	9.45676e-09	1	Zfp322a	1.22432
Trp53bp1	2.89183e-13	0.829002	0.775	0.692	9.68822e-09	1	Trp53bp1	1.11994
Top2b	3.08852e-13	2.26524	0.654	0.569	1.03472e-08	1	Top2b	1.14938
4930587E11Rik	3.10801e-13	19.3454	0.589	0.503	1.04125e-08	1	4930587E11Rik	1.17097
Ap2a1	3.1913e-13	0.903915	0.529	0.445	1.06915e-08	1	Ap2a1	1.18876
Slitrk3	3.21805e-13	0.588013	0.404	0.319	1.07811e-08	1	Slitrk3	1.26646
Prpf40b	3.35885e-13	2.397	0.474	0.388	1.12528e-08	1	Prpf40b	1.22165
Wwc1	3.53459e-13	1.67576	0.841	0.771	1.18416e-08	1	Wwc1	1.09079
Copa	3.55004e-13	0.925432	0.668	0.6	1.18933e-08	1	Copa	1.11333
Usp40	3.58274e-13	2.64842	0.606	0.528	1.20029e-08	1	Usp40	1.14773
Gm5441	3.76627e-13	4.52032	0.582	0.503	1.26177e-08	1	Gm5441	1.15706
Trappc9	3.8961e-13	1.03681	0.787	0.736	1.30527e-08	1	Trappc9	1.06929
AC165953.2	3.96807e-13	8.23897	0.231	0.164	1.32938e-08	1	AC165953.2	1.40854
Klhdc3	3.97754e-13	0.69814	0.258	0.186	1.33256e-08	1	Klhdc3	1.3871
Dis3l2	4.07935e-13	0.791673	0.781	0.723	1.36666e-08	1	Dis3l2	1.08022
Med13l	4.13688e-13	7.72113	0.75	0.671	1.38594e-08	1	Med13l	1.11773
Pds5a1	4.21404e-13	1.87985	0.696	0.627	1.41179e-08	1	Pds5a	1.11005
Fxr1	4.26484e-13	0.564408	0.775	0.717	1.42881e-08	1	Fxr1	1.08089
Yeats2	4.37944e-13	0.723348	0.703	0.639	1.4672e-08	1	Yeats2	1.10016
Hbs1l	4.439e-13	0.61314	0.561	0.482	1.48715e-08	1	Hbs1l	1.1639
Sptlc2	5.00836e-13	3.31576	0.656	0.586	1.6779e-08	1	Sptlc2	1.11945
Zfp810	5.05211e-13	0.886312	0.427	0.346	1.69256e-08	1	Zfp810	1.2341
Eps15l1	5.06058e-13	1.11787	0.71	0.635	1.6954e-08	1	Eps15l1	1.11811
Prdx6	5.2115e-13	0.750251	0.399	0.317	1.74596e-08	1	Prdx6	1.25868
Cfap69	5.29219e-13	1.06194	0.51	0.425	1.77299e-08	1	Cfap69	1.2
Lrp6	5.31231e-13	2.80939	0.601	0.519	1.77973e-08	1	Lrp6	1.158
Alms1	5.56684e-13	2.14965	0.557	0.478	1.865e-08	1	Alms1	1.16527
Ide	5.89295e-13	0.663765	0.448	0.358	1.97426e-08	1	Ide	1.2514
Pikfyve	5.89434e-13	0.531702	0.538	0.453	1.97472e-08	1	Pikfyve	1.18764
Tbce	6.36656e-13	2.24176	0.63	0.565	2.13292e-08	1	Tbce	1.11504
Brd9	7.29149e-13	1.98	0.6	0.519	2.44279e-08	1	Brd9	1.15607
Anks1	8.30937e-13	1.36353	0.558	0.477	2.78381e-08	1	Anks1	1.16981
Camk1	9.51187e-13	1.05776	0.51	0.432	3.18667e-08	1	Camk1	1.18056
Prrc2c	1.17358e-12	8.88224	0.892	0.856	3.93173e-08	1	Prrc2c	1.04206
Kmt2b	1.20996e-12	1.05931	0.419	0.337	4.05362e-08	1	Kmt2b	1.24332
Nphp3	1.24829e-12	0.753136	0.262	0.192	4.18203e-08	1	Nphp3	1.36458
Zmym4	1.28434e-12	1.1472	0.861	0.817	4.3028e-08	1	Zmym4	1.05386
Prpf38b	1.55335e-12	0.822319	0.527	0.446	5.20404e-08	1	Prpf38b	1.18161
Ptgds	1.59712e-12	35.1664	0.303	0.227	5.35066e-08	1	Ptgds	1.3348
Ap1g1	1.66563e-12	0.876749	0.6	0.523	5.58019e-08	1	Ap1g1	1.14723
Eif4g31	1.66616e-12	0.76995	0.908	0.864	5.58197e-08	1	Eif4g3	1.05093
D130040H23Rik	1.69391e-12	0.575502	0.432	0.356	5.67494e-08	1	D130040H23Rik	1.21348
Gm11844	1.9146e-12	0.731289	0.447	0.364	6.4143e-08	1	Gm11844	1.22802
Whamm	1.92183e-12	1.76981	0.373	0.291	6.43851e-08	1	Whamm	1.28179
Ppp6r2	1.93322e-12	4.57876	0.725	0.658	6.47666e-08	1	Ppp6r2	1.10182
Nim1k	2.07716e-12	2.24514	0.417	0.333	6.9589e-08	1	Nim1k	1.25225
Gga1	2.0998e-12	0.587066	0.399	0.319	7.03476e-08	1	Gga1	1.25078
Appl2	2.10206e-12	0.508295	0.355	0.278	7.04232e-08	1	Appl2	1.27698
Map4k2	2.30298e-12	0.770499	0.436	0.354	7.71546e-08	1	Map4k2	1.23164
Rps6kb1	2.32715e-12	2.91807	0.726	0.665	7.79642e-08	1	Rps6kb1	1.09173
Clk4	2.46971e-12	1.49579	0.665	0.6	8.27401e-08	1	Clk4	1.10833
Rufy2	2.82479e-12	2.9186	0.786	0.741	9.46361e-08	1	Rufy2	1.06073
Prdx4	2.98081e-12	0.588848	0.308	0.237	9.98631e-08	1	Prdx4	1.29958
Lims1	3.12557e-12	2.42646	0.68	0.62	1.04713e-07	1	Lims1	1.09677
Gpc1	3.20459e-12	0.643217	0.383	0.303	1.0736e-07	1	Gpc1	1.26403
Stat2	3.26345e-12	0.689022	0.382	0.303	1.09332e-07	1	Stat2	1.26073
Fnip2	3.49852e-12	6.29855	0.614	0.532	1.17207e-07	1	Fnip2	1.15414
Cep164	3.62718e-12	2.16104	0.523	0.444	1.21518e-07	1	Cep164	1.17793
5031439G07Rik	3.69078e-12	1.89079	0.477	0.397	1.23649e-07	1	5031439G07Rik	1.20151
Hacd1	3.73371e-12	6.46974	0.53	0.458	1.25087e-07	1	Hacd1	1.15721
Dlst	4.11129e-12	1.08233	0.506	0.433	1.37737e-07	1	Dlst	1.16859
Acap3	4.14061e-12	0.686489	0.297	0.222	1.38719e-07	1	Acap3	1.33784
Sub1	4.91025e-12	1.39524	0.582	0.504	1.64503e-07	1	Sub1	1.15476
Ncapd3	5.50513e-12	3.35662	0.652	0.585	1.84433e-07	1	Ncapd3	1.11453
Gm50138	5.76691e-12	1.00152	0.22	0.151	1.93203e-07	1	Gm50138	1.45695
Dnajc11	6.05304e-12	0.952102	0.433	0.348	2.02789e-07	1	Dnajc11	1.24425
Sympk	6.16958e-12	1.12151	0.537	0.463	2.06693e-07	1	Sympk	1.15983
Axin1	6.28858e-12	2.99007	0.712	0.633	2.1068e-07	1	Axin1	1.1248
Napg	6.30317e-12	0.559677	0.621	0.557	2.11169e-07	1	Napg	1.1149
Eif4e	7.01128e-12	1.26268	0.547	0.471	2.34892e-07	1	Eif4e	1.16136
Dennd6b	7.05611e-12	0.516711	0.426	0.35	2.36394e-07	1	Dennd6b	1.21714
Arhgef17	7.43227e-12	1.36865	0.411	0.331	2.48996e-07	1	Arhgef17	1.24169
Scyl2	8.9946e-12	0.632545	0.421	0.344	3.01337e-07	1	Scyl2	1.22384
Zfyve27	9.84978e-12	0.580231	0.45	0.372	3.29987e-07	1	Zfyve27	1.20968
Map3k10	1.01762e-11	1.39145	0.431	0.358	3.40923e-07	1	Map3k10	1.20391
Rhobtb2	1.10706e-11	2.2081	0.523	0.445	3.70887e-07	1	Rhobtb2	1.17528
Clpx	1.32517e-11	0.897961	0.513	0.431	4.4396e-07	1	Clpx	1.19026
Slc39a13	1.42884e-11	0.505534	0.286	0.216	4.78689e-07	1	Slc39a13	1.32407
Zfp973	1.54018e-11	4.18167	0.288	0.219	5.15992e-07	1	Zfp973	1.31507
Trpc1	1.8156e-11	2.32932	0.694	0.622	6.08262e-07	1	Trpc1	1.11576
Tlk2	1.82058e-11	0.78717	0.647	0.571	6.09931e-07	1	Tlk2	1.1331
Wdr26	1.82489e-11	1.60272	0.67	0.591	6.11376e-07	1	Wdr26	1.13367
Gle1	1.9202e-11	0.75144	0.399	0.322	6.43305e-07	1	Gle1	1.23913
Pip5k1a	2.26409e-11	1.4306	0.627	0.553	7.58515e-07	1	Pip5k1a	1.13382
Nr2c2	2.37331e-11	8.23189	0.727	0.665	7.95106e-07	1	Nr2c2	1.09323
Eny2	2.3872e-11	0.589762	0.425	0.345	7.99761e-07	1	Eny2	1.23188
1810013L24Rik	2.44563e-11	1.54646	0.494	0.411	8.19336e-07	1	1810013L24Rik	1.20195
Fam208a	2.90998e-11	1.32138	0.206	0.147	9.74901e-07	1	Fam208a	1.40136
Aftph	3.19212e-11	0.994291	0.641	0.569	1.06943e-06	1	Aftph	1.12654
Mdm4	3.1948e-11	1.75643	0.683	0.616	1.07032e-06	1	Mdm4	1.10877
Mark4	3.48678e-11	0.679221	0.402	0.325	1.16814e-06	1	Mark4	1.23692
Ergic2	3.60372e-11	0.626441	0.577	0.513	1.20732e-06	1	Ergic2	1.12476
0610010F05Rik	3.64192e-11	2.75542	0.709	0.638	1.22012e-06	1	0610010F05Rik	1.11129
Grk5	4.14868e-11	1.51975	0.431	0.356	1.38989e-06	1	Grk5	1.21067
Smg5	4.37898e-11	1.02437	0.453	0.379	1.46705e-06	1	Smg5	1.19525
Iars	4.38253e-11	0.870344	0.467	0.391	1.46824e-06	1	Iars	1.19437
Mbp	4.59532e-11	3.01236	0.369	0.441	1.53952e-06	1	Mbp	0.836735
Unc13b	4.83412e-11	3.17655	0.763	0.699	1.61953e-06	1	Unc13b	1.09156
Cyb5r4	5.05603e-11	2.12458	0.445	0.367	1.69387e-06	1	Cyb5r4	1.21253
Sec23a	5.08087e-11	0.583534	0.534	0.458	1.70219e-06	1	Sec23a	1.16594
Nt5c3b	5.73214e-11	0.769778	0.321	0.248	1.92038e-06	1	Nt5c3b	1.29435
Gm10862	5.73228e-11	1.12465	0.313	0.247	1.92043e-06	1	Gm10862	1.26721
Slc37a3	5.80266e-11	0.554677	0.333	0.263	1.94401e-06	1	Slc37a3	1.26616
Trpv2	5.87744e-11	1.03661	0.413	0.335	1.96906e-06	1	Trpv2	1.23284
Crebrf	6.13962e-11	6.12529	0.668	0.589	2.0569e-06	1	Crebrf	1.13413
Nfyc	6.71892e-11	1.29861	0.611	0.532	2.25097e-06	1	Nfyc	1.1485
Glyr1	6.91605e-11	1.01706	0.615	0.551	2.31701e-06	1	Glyr1	1.11615
D10Wsu102e	7.06948e-11	4.68295	0.611	0.531	2.36842e-06	1	D10Wsu102e	1.15066
Arhgap35	7.37743e-11	2.16879	0.739	0.691	2.47158e-06	1	Arhgap35	1.06946
Washc4	8.39615e-11	1.03115	0.586	0.507	2.81288e-06	1	Washc4	1.15582
Ppp4r3a	8.97855e-11	1.62563	0.533	0.453	3.00799e-06	1	Ppp4r3a	1.1766
Snx13	9.6403e-11	2.0657	0.595	0.527	3.22969e-06	1	Snx13	1.12903
Ipo11	9.84948e-11	0.90272	0.638	0.568	3.29977e-06	1	Ipo11	1.12324
Mgat3	1.02973e-10	1.99337	0.408	0.342	3.4498e-06	1	Mgat3	1.19298
Matr3	1.03593e-10	1.05965	0.632	0.562	3.47057e-06	1	Matr3	1.12456
Cdc27	1.20084e-10	0.795495	0.547	0.483	4.02306e-06	1	Cdc27	1.13251
Gpr631	1.20245e-10	0.556288	0.249	0.186	4.02844e-06	1	Gpr63	1.33871
Kdm4b	1.21011e-10	0.656658	0.51	0.436	4.0541e-06	1	Kdm4b	1.16972
Sox11	1.25184e-10	0.83415	0.39	0.313	4.19392e-06	1	Sox11	1.24601
Smchd1	1.26605e-10	1.01762	0.686	0.622	4.24152e-06	1	Smchd1	1.10289
Rcor1	1.26831e-10	0.854686	0.445	0.374	4.24909e-06	1	Rcor1	1.18984
Shisal1	1.39409e-10	3.90879	0.474	0.414	4.67048e-06	1	Shisal1	1.14493
Hace1	1.40593e-10	1.50894	0.603	0.536	4.71013e-06	1	Hace1	1.125
Asb7	1.40816e-10	0.660171	0.385	0.31	4.71763e-06	1	Asb7	1.24194
Kpna6	1.4756e-10	0.555361	0.35	0.28	4.94354e-06	1	Kpna6	1.25
Atg4c	1.7517e-10	1.345	0.485	0.412	5.86855e-06	1	Atg4c	1.17718
Gm38085	1.76479e-10	0.815162	0.196	0.14	5.91238e-06	1	Gm38085	1.4
D17Wsu92e	1.78795e-10	0.875046	0.15	0.099	5.98997e-06	1	D17Wsu92e	1.51515
Ppp4r1	2.02335e-10	1.67156	0.546	0.468	6.77864e-06	1	Ppp4r1	1.16667
Psmb2	2.05698e-10	1.08556	0.6	0.537	6.8913e-06	1	Psmb2	1.11732
Atr	2.06196e-10	0.878394	0.555	0.48	6.90796e-06	1	Atr	1.15625
Mccc1	2.21093e-10	0.585218	0.486	0.416	7.40706e-06	1	Mccc1	1.16827
Nup188	2.2162e-10	0.7351	0.334	0.263	7.42471e-06	1	Nup188	1.26996
Ptpn11	2.24709e-10	0.935869	0.574	0.506	7.52821e-06	1	Ptpn11	1.13439
Mtmr3	2.31173e-10	1.27638	0.796	0.751	7.74475e-06	1	Mtmr3	1.05992
Mkl2	2.41278e-10	0.873663	0.301	0.238	8.08329e-06	1	Mkl2	1.26471
Eif2ak1	2.65233e-10	0.5213	0.362	0.293	8.88583e-06	1	Eif2ak1	1.23549
Leng8	2.96043e-10	0.834443	0.677	0.617	9.91803e-06	1	Leng8	1.09724
Ipcef1	3.07613e-10	7.6216	0.373	0.297	1.03057e-05	1	Ipcef1	1.25589
Snca	3.25054e-10	1.87338	0.636	0.695	1.089e-05	1	Snca	0.915108
Gon4l	3.65388e-10	0.532924	0.766	0.722	1.22412e-05	1	Gon4l	1.06094
Kctd2	4.02609e-10	0.655319	0.244	0.181	1.34882e-05	1	Kctd2	1.34807
Lias	4.27756e-10	0.670209	0.357	0.289	1.43307e-05	1	Lias	1.23529
Fam149b	4.47967e-10	0.65337	0.526	0.456	1.50078e-05	1	Fam149b	1.15351
Socs7	4.6286e-10	1.79268	0.472	0.407	1.55067e-05	1	Socs7	1.15971
Frrs1	4.72506e-10	0.636213	0.279	0.21	1.58299e-05	1	Frrs1	1.32857
Ttbk1	5.09473e-10	1.86687	0.507	0.431	1.70683e-05	1	Ttbk1	1.17633
Loxl2	5.69078e-10	0.746183	0.11	0.068	1.90653e-05	1	Loxl2	1.61765
Adamts2	5.78656e-10	1.87778	0.099	0.155	1.93861e-05	1	Adamts2	0.63871
Pvt1	6.12935e-10	3.09937	0.682	0.579	2.05346e-05	1	Pvt1	1.17789
Gtf2a1	6.4364e-10	2.4019	0.519	0.45	2.15632e-05	1	Gtf2a1	1.15333
Ppp4r2	6.47251e-10	0.505903	0.57	0.497	2.16842e-05	1	Ppp4r2	1.14688
Morc2a	6.87186e-10	0.684755	0.476	0.402	2.30221e-05	1	Morc2a	1.18408
Ccz1	7.51026e-10	0.777545	0.416	0.35	2.51609e-05	1	Ccz1	1.18857
Dctn11	8.06909e-10	1.70667	0.604	0.528	2.70331e-05	1	Dctn1	1.14394
BC005537	8.87457e-10	3.86838	0.531	0.459	2.97316e-05	1	BC005537	1.15686
Tnrc18	9.72534e-10	1.14185	0.715	0.647	3.25818e-05	1	Tnrc18	1.1051
Guf1	1.0214e-09	0.546259	0.433	0.361	3.42189e-05	1	Guf1	1.19945
Erg28	1.03049e-09	2.52816	0.47	0.398	3.45234e-05	1	Erg28	1.1809
Evi5l	1.03125e-09	0.583608	0.565	0.492	3.45491e-05	1	Evi5l	1.14837
Hexb	1.09207e-09	0.65941	0.503	0.437	3.65866e-05	1	Hexb	1.15103
Cpne3	1.13384e-09	0.506504	0.357	0.285	3.7986e-05	1	Cpne3	1.25263
Fam114a2	1.19513e-09	0.758887	0.362	0.292	4.00392e-05	1	Fam114a2	1.23973
Thoc1	1.32328e-09	0.873974	0.709	0.653	4.43325e-05	1	Thoc1	1.08576
Phf121	1.5719e-09	1.23666	0.597	0.53	5.26617e-05	1	Phf12	1.12642
Ptpa	1.60626e-09	1.31088	0.58	0.521	5.3813e-05	1	Ptpa	1.11324
Rab10	1.71692e-09	7.11443	0.751	0.693	5.75201e-05	1	Rab10	1.08369
Zfat	1.82991e-09	0.964426	0.422	0.35	6.13056e-05	1	Zfat	1.20571
Chd4	1.86429e-09	0.950181	0.765	0.702	6.24573e-05	1	Chd4	1.08974
Btrc	1.87332e-09	1.52184	0.815	0.768	6.27598e-05	1	Btrc	1.0612
Afg3l2	1.92082e-09	0.773509	0.511	0.447	6.43515e-05	1	Afg3l2	1.14318
Zufsp	2.05859e-09	1.381	0.179	0.127	6.89669e-05	1	Zufsp	1.40945
4933424G05Rik	2.07541e-09	1.37655	0.276	0.211	6.95304e-05	1	4933424G05Rik	1.30806
Ythdc2	2.2234e-09	1.53102	0.56	0.493	7.44883e-05	1	Ythdc2	1.1359
Iqcm	2.24304e-09	0.765213	0.133	0.087	7.51462e-05	1	Iqcm	1.52874
Adck1	2.40496e-09	2.1804	0.439	0.371	8.05708e-05	1	Adck1	1.18329
Rab8b	2.42147e-09	1.87517	0.37	0.299	8.11242e-05	1	Rab8b	1.23746
Rangap1	2.56162e-09	0.623275	0.613	0.548	8.58194e-05	1	Rangap1	1.11861
Ric8b	2.70641e-09	0.542061	0.612	0.554	9.06701e-05	1	Ric8b	1.10469
Cse1l	2.79992e-09	1.68696	0.419	0.344	9.38028e-05	1	Cse1l	1.21802
Desi1	3.00348e-09	0.832723	0.53	0.464	0.000100623	1	Desi1	1.14224
Add1	3.17971e-09	0.814531	0.69	0.627	0.000106527	1	Add1	1.10048
Farp2	3.39872e-09	0.616762	0.365	0.301	0.000113864	1	Farp2	1.21262
A830019P07Rik	3.40356e-09	12.0082	0.503	0.43	0.000114026	1	A830019P07Rik	1.16977
Abcf1	3.40564e-09	1.33376	0.42	0.352	0.000114096	1	Abcf1	1.19318
Fam91a1	3.94402e-09	0.827813	0.335	0.269	0.000132132	1	Fam91a1	1.24535
Gpr68	4.0399e-09	0.562061	0.292	0.228	0.000135345	1	Gpr68	1.2807
Phtf1	4.20277e-09	0.674421	0.647	0.592	0.000140801	1	Phtf1	1.09291
Ikbkap	4.47612e-09	0.735864	0.151	0.105	0.000149959	1	Ikbkap	1.4381
Epg5	4.65718e-09	1.20103	0.487	0.419	0.000156025	1	Epg5	1.16229
Atad3a	4.89275e-09	0.61481	0.389	0.319	0.000163917	1	Atad3a	1.21944
Nol10	5.3006e-09	0.544614	0.439	0.366	0.000177581	1	Nol10	1.19945
Nufip2	5.61151e-09	3.00743	0.646	0.595	0.000187997	1	Nufip2	1.08571
Usp31	5.78378e-09	3.96581	0.531	0.465	0.000193768	1	Usp31	1.14194
Mdm2	5.86014e-09	0.574374	0.391	0.324	0.000196326	1	Mdm2	1.20679
Abca31	6.25713e-09	1.49811	0.701	0.651	0.000209626	1	Abca3	1.0768
Tank	6.4658e-09	1.07603	0.447	0.376	0.000216617	1	Tank	1.18883
Bfar	6.6144e-09	0.851153	0.438	0.372	0.000221596	1	Bfar	1.17742
Kdm3a	6.71325e-09	0.643955	0.383	0.318	0.000224907	1	Kdm3a	1.2044
Naa25	7.45993e-09	0.512947	0.366	0.301	0.000249922	1	Naa25	1.21595
Rbm10	8.29519e-09	0.859948	0.507	0.439	0.000277905	1	Rbm10	1.1549
Tmem65	8.34678e-09	1.56302	0.352	0.284	0.000279634	1	Tmem65	1.23944
Kpnb1	8.78989e-09	1.1543	0.416	0.355	0.000294479	1	Kpnb1	1.17183
Xpo5	8.83201e-09	0.532091	0.303	0.237	0.00029589	1	Xpo5	1.27848
Rnf103	9.61457e-09	0.699418	0.497	0.432	0.000322107	1	Rnf103	1.15046
Mlec	9.75193e-09	1.01067	0.308	0.247	0.000326709	1	Mlec	1.24696
Nol11	1.07592e-08	0.759434	0.415	0.354	0.000360454	1	Nol11	1.17232
Cdc73	1.09774e-08	1.16117	0.602	0.527	0.000367766	1	Cdc73	1.14231
Cep126	1.22899e-08	1.16821	0.538	0.477	0.000411736	1	Cep126	1.12788
Mtor	1.28608e-08	1.04512	0.569	0.498	0.000430864	1	Mtor	1.14257
Arhgef18	1.46559e-08	1.00008	0.524	0.458	0.000491001	1	Arhgef18	1.1441
Zdhhc8	1.46863e-08	0.506265	0.45	0.383	0.000492021	1	Zdhhc8	1.17493
Tsnax	1.52001e-08	0.902943	0.43	0.367	0.000509233	1	Tsnax	1.17166
Vapb	1.54855e-08	0.549786	0.465	0.395	0.000518794	1	Vapb	1.17722
Ndufs3	1.55693e-08	0.823247	0.399	0.337	0.000521604	1	Ndufs3	1.18398
Flrt3	1.61462e-08	0.935788	0.518	0.453	0.000540931	1	Flrt3	1.14349
Pias1	1.67815e-08	0.571749	0.649	0.597	0.000562212	1	Pias1	1.0871
Gprasp21	1.77361e-08	0.819631	0.33	0.395	0.000594194	1	Gprasp2	0.835443
Bcorl1	1.91477e-08	1.11841	0.354	0.288	0.000641486	1	Bcorl1	1.22917
Gm13187	1.93359e-08	0.897808	0.335	0.276	0.000647791	1	Gm13187	1.21377
Acat1	2.00792e-08	2.27308	0.685	0.638	0.000672692	1	Acat1	1.07367
Rnf214	2.24305e-08	5.03962	0.556	0.485	0.000751467	1	Rnf214	1.14639
Gpld1	2.27088e-08	0.571904	0.382	0.315	0.00076079	1	Gpld1	1.2127
Ybx1	2.31972e-08	1.30814	0.544	0.481	0.000777151	1	Ybx1	1.13098
Tmem189	2.36352e-08	5.25634	0.43	0.366	0.000791828	1	Tmem189	1.17486
Slc25a46	2.37601e-08	0.674463	0.385	0.325	0.000796011	1	Slc25a46	1.18462
St3gal5	2.4766e-08	2.40642	0.557	0.508	0.00082971	1	St3gal5	1.09646
Ano10	2.89988e-08	0.931811	0.349	0.287	0.000971517	1	Ano10	1.21603
2010111I01Rik	3.08341e-08	0.817771	0.321	0.27	0.00103301	1	2010111I01Rik	1.18889
Riok1	3.52259e-08	0.511849	0.415	0.355	0.00118014	1	Riok1	1.16901
Tcp11l1	3.59553e-08	1.71897	0.63	0.58	0.00120458	1	Tcp11l1	1.08621
Ap3s2	3.68685e-08	1.18036	0.41	0.351	0.00123517	1	Ap3s2	1.16809
Aco2	3.70985e-08	0.902017	0.62	0.569	0.00124287	1	Aco2	1.08963
Cnot7	3.84846e-08	0.56283	0.509	0.445	0.00128931	1	Cnot7	1.14382
Mecr	3.96351e-08	0.650193	0.565	0.5	0.00132786	1	Mecr	1.13
Mapk1ip1	4.29864e-08	1.03746	0.406	0.344	0.00144013	1	Mapk1ip1	1.18023
Usp22	4.33992e-08	0.918187	0.512	0.456	0.00145396	1	Usp22	1.12281
Nup214	4.58084e-08	1.50598	0.473	0.406	0.00153467	1	Nup214	1.16502
Inpp5b	5.02817e-08	0.725229	0.528	0.459	0.00168454	1	Inpp5b	1.15033
Trim24	5.04685e-08	3.41704	0.536	0.468	0.00169079	1	Trim24	1.1453
Fggy	5.16494e-08	0.638666	0.457	0.394	0.00173036	1	Fggy	1.1599
Togaram1	5.31459e-08	1.0043	0.482	0.425	0.0017805	1	Togaram1	1.13412
Dennd4c	6.36535e-08	2.30105	0.593	0.524	0.00213252	1	Dennd4c	1.13168
Mkl1	7.11653e-08	1.21782	0.222	0.17	0.00238418	1	Mkl1	1.30588
Mdn1	8.17553e-08	3.42305	0.682	0.637	0.00273896	1	Mdn1	1.07064
Fsd1l	8.38359e-08	0.593438	0.606	0.541	0.00280867	1	Fsd1l	1.12015
Gm14296	8.52212e-08	0.553335	0.492	0.428	0.00285508	1	Gm14296	1.14953
Nipsnap1	8.60645e-08	0.789927	0.498	0.44	0.00288333	1	Nipsnap1	1.13182
Esrra	9.33948e-08	0.856406	0.34	0.279	0.00312891	1	Esrra	1.21864
Naa40	9.36867e-08	0.707485	0.491	0.437	0.00313869	1	Naa40	1.12357
Snrnp48	9.8019e-08	0.90551	0.623	0.569	0.00328383	1	Snrnp48	1.0949
Rnft2	1.14641e-07	0.898452	0.4	0.34	0.00384069	1	Rnft2	1.17647
Nkd1	1.50281e-07	1.08438	0.262	0.317	0.00503471	1	Nkd1	0.826498
Gcc2	1.54379e-07	2.03651	0.66	0.605	0.005172	1	Gcc2	1.09091
Syt14	1.54631e-07	0.607924	0.708	0.65	0.00518043	1	Syt14	1.08923
Caap1	1.55089e-07	0.60116	0.431	0.372	0.0051958	1	Caap1	1.1586
Rapgef1	1.59846e-07	3.7924	0.651	0.582	0.00535515	1	Rapgef1	1.11856
Zfp740	1.67663e-07	0.605149	0.336	0.278	0.00561704	1	Zfp740	1.20863
Adcy5	1.94595e-07	2.2996	0.608	0.534	0.00651933	1	Adcy5	1.13858
Gm43376	2.08211e-07	17.2668	0.618	0.563	0.00697548	1	Gm43376	1.09769
Tnks2	2.18396e-07	1.2534	0.68	0.63	0.00731671	1	Tnks2	1.07937
Gm20641	2.28031e-07	1.18814	0.214	0.164	0.00763949	1	Gm20641	1.30488
Pkd21	2.43881e-07	0.614648	0.597	0.532	0.0081705	1	Pkd2	1.12218
Rmdn2	2.56126e-07	0.761186	0.2	0.153	0.00858075	1	Rmdn2	1.30719
Gmcl1	2.792e-07	1.65847	0.749	0.696	0.00935374	1	Gmcl1	1.07615
A430010J10Rik	2.83214e-07	0.726042	0.137	0.096	0.00948823	1	A430010J10Rik	1.42708
Preb	2.93164e-07	0.71396	0.522	0.472	0.0098216	1	Preb	1.10593
Pigu	3.15488e-07	0.514168	0.486	0.421	0.0105695	1	Pigu	1.15439
Zdhhc21	3.29358e-07	0.511895	0.527	0.468	0.0110341	1	Zdhhc21	1.12607
Ncoa5	3.45912e-07	1.51663	0.628	0.573	0.0115887	1	Ncoa5	1.09599
Actr2	3.47085e-07	0.744061	0.675	0.619	0.011628	1	Actr2	1.09047
Creb1	3.54397e-07	1.27683	0.546	0.487	0.011873	1	Creb1	1.12115
Ywhah	3.54466e-07	5.84838	0.718	0.664	0.0118753	1	Ywhah	1.08133
Mast1	3.65336e-07	0.564902	0.578	0.529	0.0122395	1	Mast1	1.09263
Gtpbp2	3.71053e-07	0.502529	0.395	0.343	0.012431	1	Gtpbp2	1.1516
Eif4g1	3.78068e-07	0.792351	0.673	0.631	0.012666	1	Eif4g1	1.06656
Flywch1	4.00107e-07	0.940956	0.576	0.512	0.0134044	1	Flywch1	1.125
Uchl1os	4.32639e-07	0.779584	0.234	0.186	0.0144943	1	Uchl1os	1.25806
Gm41836	4.37623e-07	1.15283	0.137	0.097	0.0146613	1	Gm41836	1.41237
Ddhd2	4.55389e-07	0.704752	0.803	0.75	0.0152564	1	Ddhd2	1.07067
Tbck	4.57371e-07	3.80615	0.653	0.593	0.0153228	1	Tbck	1.10118
Rock1	4.6319e-07	2.5019	0.822	0.795	0.0155178	1	Rock1	1.03396
Heatr5a	5.13207e-07	2.245	0.271	0.332	0.0171935	1	Heatr5a	0.816265
Gm14703	5.15988e-07	0.890913	0.373	0.314	0.0172866	1	Gm14703	1.1879
Ccdc28a	5.84203e-07	0.654787	0.406	0.35	0.019572	1	Ccdc28a	1.16
Ube2k	6.11928e-07	1.70672	0.774	0.734	0.0205008	1	Ube2k	1.0545
9930021J03Rik	6.47758e-07	1.85038	0.763	0.718	0.0217012	1	9930021J03Rik	1.06267
Ilf3	6.74822e-07	0.52608	0.515	0.46	0.0226079	1	Ilf3	1.11957
4930415C11Rik	7.22425e-07	15.282	0.491	0.429	0.0242027	1	4930415C11Rik	1.14452
Nbr1	8.25903e-07	0.951198	0.532	0.477	0.0276694	1	Nbr1	1.1153
Abca2	8.27223e-07	1.59189	0.59	0.536	0.0277136	1	Abca2	1.10075
Colec12	8.30087e-07	1.34069	0.159	0.116	0.0278096	1	Colec12	1.37069
Errfi1	8.38826e-07	4.5794	0.196	0.149	0.0281024	1	Errfi1	1.31544
Usp8	1.0655e-06	0.865673	0.501	0.441	0.0356963	1	Usp8	1.13605
Zfyve1	1.0908e-06	1.83049	0.494	0.445	0.0365438	1	Zfyve1	1.11011
Wipi2	1.11535e-06	1.13857	0.469	0.413	0.0373665	1	Wipi2	1.13559
Wnk1	1.13403e-06	2.92471	0.809	0.761	0.0379922	1	Wnk1	1.06307
Ube2d2a	1.17392e-06	2.2075	0.644	0.599	0.0393285	1	Ube2d2a	1.07513
Abcd3	1.44067e-06	1.38501	0.44	0.39	0.0482652	1	Abcd3	1.12821
Glis3	0	38.2816	0.945	0.203	0	2	Glis3	4.65517
Cadps2	0	32.1289	0.946	0.282	0	2	Cadps2	3.35461
Rerg	0	6.9899	0.733	0.125	0	2	Rerg	5.864
Satb2	0	5.23969	0.56	0.104	0	2	Satb2	5.38462
Bcl11b	0	4.46354	0.795	0.232	0	2	Bcl11b	3.42672
Pbx3	0	4.19109	0.867	0.286	0	2	Pbx3	3.03147
Maf	0	3.16103	0.487	0.055	0	2	Maf	8.85455
Lamb1	0	3.10917	0.547	0.094	0	2	Lamb1	5.81915
Gypc	0	1.17448	0.252	0.008	0	2	Gypc	31.5
Pcdh15	4.16153e-299	42.1687	0.988	0.712	1.3942e-294	2	Pcdh15	1.38764
Tspan9	5.92863e-298	5.98364	0.602	0.142	1.98621e-293	2	Tspan9	4.23944
Ptprt	3.06172e-297	59.4599	0.981	0.641	1.02574e-292	2	Ptprt	1.53042
Lama3	8.66575e-291	3.32247	0.693	0.206	2.9032e-286	2	Lama3	3.36408
Insrr	2.23463e-288	4.28113	0.378	0.049	7.48647e-284	2	Insrr	7.71429
Gm15398	1.09798e-287	27.72	0.873	0.378	3.67844e-283	2	Gm15398	2.30952
Col6a1	5.90471e-285	1.30941	0.203	0.008	1.9782e-280	2	Col6a1	25.375
Slc25a13	1.39769e-250	17.3084	0.29	0.031	4.68255e-246	2	Slc25a13	9.35484
Csgalnact1	3.05308e-235	3.70547	0.754	0.297	1.02284e-230	2	Csgalnact1	2.53872
Fhod3	9.32916e-223	40.7151	0.99	0.877	3.12546e-218	2	Fhod3	1.12885
Syt10	8.12091e-220	4.7751	0.812	0.359	2.72067e-215	2	Syt10	2.26184
Htr1d	4.68798e-218	1.32245	0.392	0.073	1.57057e-213	2	Htr1d	5.36986
Cacng3	6.74383e-213	24.6535	0.936	0.635	2.25932e-208	2	Cacng3	1.47402
C79798	9.53587e-213	3.31127	0.4	0.078	3.19471e-208	2	C79798	5.12821
Mvb12b	6.04843e-212	8.94416	0.881	0.539	2.02635e-207	2	Mvb12b	1.63451
Dlgap2	6.30669e-210	27.6607	0.97	0.699	2.11287e-205	2	Dlgap2	1.3877
Zfp536	3.64661e-207	0.700666	0.926	0.543	1.22169e-202	2	Zfp536	1.70534
Fam78b	2.70164e-205	11.5778	0.646	0.234	9.05103e-201	2	Fam78b	2.76068
Rfx3	2.66001e-201	21.0114	0.941	0.722	8.91156e-197	2	Rfx3	1.30332
Abcc4	2.59787e-190	8.27185	0.421	0.098	8.7034e-186	2	Abcc4	4.29592
Traip	6.318e-183	6.53405	0.709	0.316	2.11666e-178	2	Traip	2.24367
Gm16701	3.27373e-176	8.7649	0.18	0.015	1.09676e-171	2	Gm16701	12
Ptprm	3.08671e-174	11.678	0.99	0.854	1.03411e-169	2	Ptprm	1.15925
Il6ra	2.23274e-173	3.434	0.46	0.127	7.48012e-169	2	Il6ra	3.62205
Ccdc187	1.62067e-172	1.62509	0.362	0.077	5.42958e-168	2	Ccdc187	4.7013
Pparg	3.33794e-165	3.94106	0.407	0.101	1.11828e-160	2	Pparg	4.0297
Tead4	5.67172e-165	1.67418	0.236	0.033	1.90014e-160	2	Tead4	7.15152
Bace2	9.01612e-162	1.28518	0.348	0.075	3.02058e-157	2	Bace2	4.64
4930555F03Rik	2.30825e-160	7.71613	0.844	0.442	7.7331e-156	2	4930555F03Rik	1.9095
9130024F11Rik	7.04655e-159	4.50891	0.218	0.028	2.36073e-154	2	9130024F11Rik	7.78571
Gck	2.09147e-156	2.91383	0.617	0.242	7.00684e-152	2	Gck	2.54959
Gm32647	3.05812e-155	213.838	1	0.817	1.02453e-150	2	Gm32647	1.22399
Map3k20	8.34916e-154	6.21388	0.338	0.075	2.79714e-149	2	Map3k20	4.50667
Greb1	2.91858e-153	0.616648	0.241	0.037	9.77784e-149	2	Greb1	6.51351
Ntrk1	1.62867e-150	1.26192	0.238	0.037	5.45638e-146	2	Ntrk1	6.43243
Gm48893	5.49281e-150	5.97271	0.667	0.298	1.8402e-145	2	Gm48893	2.23826
Tmem132c1	8.64913e-149	3.66359	0.863	0.506	2.89763e-144	2	Tmem132c	1.70553
Rai14	1.6733e-148	1.70922	0.303	0.063	5.60588e-144	2	Rai14	4.80952
Arhgap18	2.19758e-148	5.00806	0.816	0.496	7.36232e-144	2	Arhgap18	1.64516
Gda	7.40691e-146	1.50137	0.344	0.08	2.48146e-141	2	Gda	4.3
Mdfic	2.0028e-145	0.609995	0.18	0.02	6.70979e-141	2	Mdfic	9
Kcnj5	1.498e-144	2.37521	0.516	0.182	5.01859e-140	2	Kcnj5	2.83516
Pcsk6	2.27681e-143	10.9079	0.553	0.21	7.62779e-139	2	Pcsk6	2.63333
Crhbp	3.3251e-143	11.3408	0.128	0.008	1.11397e-138	2	Crhbp	16
Nptxr	7.95082e-141	4.58013	0.974	0.799	2.66368e-136	2	Nptxr	1.21902
Ptpro	8.9271e-141	8.18441	0.775	0.427	2.99076e-136	2	Ptpro	1.81499
Gsg1l	1.18225e-139	1.62291	0.481	0.158	3.96079e-135	2	Gsg1l	3.0443
Ncam2	2.98076e-139	33.5015	0.991	0.874	9.98615e-135	2	Ncam2	1.13387
Nckap5	1.58933e-136	11.7951	0.839	0.516	5.32459e-132	2	Nckap5	1.62597
Cplx2	1.87787e-132	1.40649	0.322	0.077	6.29123e-128	2	Cplx2	4.18182
Runx1t1	2.27641e-132	12.1263	0.97	0.839	7.62642e-128	2	Runx1t1	1.15614
Drd1	3.8093e-132	0.51848	0.209	0.032	1.27619e-127	2	Drd1	6.53125
Sp9	4.48335e-130	0.992276	0.244	0.045	1.50201e-125	2	Sp9	5.42222
Adamts18	5.91607e-129	0.791438	0.404	0.121	1.982e-124	2	Adamts18	3.33884
Pear1	5.78776e-128	0.641909	0.162	0.019	1.93901e-123	2	Pear1	8.52632
Lpp	1.14239e-126	7.31412	0.78	0.476	3.82722e-122	2	Lpp	1.63866
Stac2	2.37395e-125	0.995706	0.266	0.055	7.95319e-121	2	Stac2	4.83636
Myh9	1.71748e-124	7.3429	0.602	0.28	5.7539e-120	2	Myh9	2.15
Rorb	4.73025e-123	19.6805	0.978	0.777	1.58473e-118	2	Rorb	1.25869
Gm32036	1.06752e-122	8.37382	0.687	0.326	3.5764e-118	2	Gm32036	2.10736
Dctd	2.39753e-121	2.09772	0.439	0.15	8.03222e-117	2	Dctd	2.92667
Gm45321	2.93436e-121	26.2647	0.734	0.377	9.83071e-117	2	Gm45321	1.94695
Gm44151	3.63648e-121	4.04815	0.807	0.488	1.21829e-116	2	Gm44151	1.65369
Cacna1h	4.84186e-119	0.866854	0.244	0.049	1.62212e-114	2	Cacna1h	4.97959
Ppfibp1	9.8587e-119	5.24794	0.74	0.404	3.30286e-114	2	Ppfibp1	1.83168
Tmem132cos	3.42913e-117	1.34936	0.62	0.289	1.14883e-112	2	Tmem132cos	2.14533
Vwa5b1	3.01707e-115	3.35618	0.704	0.369	1.01078e-110	2	Vwa5b1	1.90786
Npffr1	1.264e-113	5.77318	0.193	0.032	4.23465e-109	2	Npffr1	6.03125
Gm2516	2.01686e-113	9.83649	0.69	0.346	6.75689e-109	2	Gm2516	1.99422
Prox1os	2.18417e-113	11.3704	0.592	0.27	7.3174e-109	2	Prox1os	2.19259
Cobl	6.2445e-113	1.14925	0.877	0.694	2.09203e-108	2	Cobl	1.26369
Fbxl7	6.65634e-113	10.4001	0.475	0.182	2.23001e-108	2	Fbxl7	2.60989
Tram2	2.00748e-111	0.560064	0.15	0.019	6.72545e-107	2	Tram2	7.89474
Foxp2	3.85444e-110	64.7888	0.997	0.904	1.29131e-105	2	Foxp2	1.10288
Cdr2	2.74452e-109	2.43834	0.299	0.079	9.19468e-105	2	Cdr2	3.78481
Elovl5	2.71182e-108	1.87328	0.637	0.32	9.08514e-104	2	Elovl5	1.99063
Gab1	9.88361e-108	2.0201	0.259	0.06	3.31121e-103	2	Gab1	4.31667
Galnt14	3.66489e-107	11.8152	0.85	0.597	1.22781e-102	2	Galnt14	1.42379
Vat1l	4.41824e-106	8.44903	0.742	0.425	1.4802e-101	2	Vat1l	1.74588
Rnf182	5.29693e-106	1.594	0.606	0.289	1.77458e-101	2	Rnf182	2.09689
Kcna1	1.85932e-104	1.66975	0.383	0.129	6.22908e-100	2	Kcna1	2.96899
Tmem181a	5.74224e-104	2.09447	0.668	0.366	1.92377e-99	2	Tmem181a	1.82514
Nts	1.14583e-103	1.4111	0.173	0.028	3.83875e-99	2	Nts	6.17857
A230087F16Rik	3.43891e-102	0.518975	0.214	0.043	1.1521e-97	2	A230087F16Rik	4.97674
Rasgrf2	8.9061e-102	11.8311	0.906	0.684	2.98372e-97	2	Rasgrf2	1.32456
Lyzl4	2.68019e-100	0.735761	0.199	0.038	8.97917e-96	2	Lyzl4	5.23684
Nmbr	3.88969e-99	1.49079	0.373	0.126	1.30312e-94	2	Nmbr	2.96032
Iqsec3	4.40451e-98	7.77552	0.867	0.667	1.4756e-93	2	Iqsec3	1.29985
Tspan11	4.51044e-98	0.594859	0.149	0.022	1.51109e-93	2	Tspan11	6.77273
Limch1	4.73912e-98	1.88744	0.797	0.529	1.5877e-93	2	Limch1	1.50662
Mak	1.05932e-97	3.38907	0.33	0.103	3.54895e-93	2	Mak	3.20388
Cpne2	1.41889e-97	2.02669	0.603	0.305	4.75356e-93	2	Cpne2	1.97705
Ribc2	2.15916e-97	0.785778	0.178	0.032	7.23363e-93	2	Ribc2	5.5625
Dchs2	3.81278e-97	4.18204	0.524	0.233	1.27736e-92	2	Dchs2	2.24893
Slc37a2	6.31124e-97	0.58001	0.143	0.02	2.11439e-92	2	Slc37a2	7.15
Dnah2	1.1404e-95	7.08258	0.31	0.095	3.82058e-91	2	Dnah2	3.26316
Zc3h12c	3.23288e-95	3.01424	0.794	0.553	1.08308e-90	2	Zc3h12c	1.4358
Tcirg1	7.23647e-95	0.6637	0.223	0.051	2.42436e-90	2	Tcirg1	4.37255
Rras2	1.12709e-94	11.4372	0.609	0.318	3.77599e-90	2	Rras2	1.91509
Lingo1	1.59066e-90	27.7267	0.926	0.78	5.32902e-86	2	Lingo1	1.18718
Trhr	9.11044e-88	1.00987	0.123	0.016	3.05218e-83	2	Trhr	7.6875
Wscd1	1.32006e-87	3.05045	0.568	0.296	4.42246e-83	2	Wscd1	1.91892
Gm15520	2.16133e-87	4.89269	0.528	0.254	7.24088e-83	2	Gm15520	2.07874
Mpped1	2.97082e-83	5.23228	0.324	0.11	9.95283e-79	2	Mpped1	2.94545
Tmem132a	1.93777e-82	5.71719	0.874	0.648	6.4919e-78	2	Tmem132a	1.34877
Adam12	5.21564e-82	10.725	0.326	0.113	1.74735e-77	2	Adam12	2.88496
C230014O12Rik	6.30878e-82	3.07808	0.212	0.052	2.11357e-77	2	C230014O12Rik	4.07692
Tmcc3	6.62169e-82	4.6197	0.986	0.871	2.2184e-77	2	Tmcc3	1.13203
Plekhg5	2.18916e-80	9.39701	0.463	0.214	7.33412e-76	2	Plekhg5	2.16355
Gm13481	2.56471e-80	9.59729	0.302	0.1	8.59229e-76	2	Gm13481	3.02
Maml3	2.96308e-80	44.9417	0.875	0.676	9.92691e-76	2	Maml3	1.29438
Arhgap26	7.39343e-80	16.155	0.949	0.869	2.47695e-75	2	Arhgap26	1.09206
Gm12002	2.35264e-79	9.86464	0.495	0.238	7.88182e-75	2	Gm12002	2.07983
Gm26771	7.9817e-79	0.94909	0.304	0.101	2.67403e-74	2	Gm26771	3.0099
2023-09-09	5.52812e-78	1.05543	0.365	0.141	1.85203e-73	2	2023-09-09	2.58865
Pfkfb4	1.06925e-77	6.30886	0.543	0.278	3.5822e-73	2	Pfkfb4	1.95324
Dclk1	4.1519e-77	29.173	0.987	0.957	1.39097e-72	2	Dclk1	1.03135
Ccdc148	1.63351e-76	6.68344	0.876	0.699	5.47258e-72	2	Ccdc148	1.25322
Slc16a6	2.02889e-76	1.41821	0.483	0.231	6.79719e-72	2	Slc16a6	2.09091
Vgll4	1.05349e-75	10.7666	0.569	0.308	3.52939e-71	2	Vgll4	1.8474
L3mbtl3	1.55257e-75	6.3159	0.682	0.427	5.20141e-71	2	L3mbtl3	1.59719
Ttc281	2.61812e-75	3.36908	0.914	0.707	8.77122e-71	2	Ttc28	1.29279
Rab40b	7.84603e-75	4.86183	0.71	0.472	2.62858e-70	2	Rab40b	1.50424
Lypd1	1.97057e-74	3.02759	0.471	0.224	6.6018e-70	2	Lypd1	2.10268
Cartpt	3.65959e-74	6.93974	0.132	0.023	1.22604e-69	2	Cartpt	5.73913
Slc2a13	1.2589e-73	170.557	0.961	0.897	4.21755e-69	2	Slc2a13	1.07135
Gpat3	1.65746e-73	0.679016	0.197	0.049	5.55284e-69	2	Gpat3	4.02041
Smyd2	2.48731e-73	2.28087	0.634	0.371	8.333e-69	2	Smyd2	1.70889
Kcnh4	4.0221e-73	0.540449	0.177	0.041	1.34749e-68	2	Kcnh4	4.31707
Notch2	4.24508e-73	19.4262	0.431	0.192	1.42219e-68	2	Notch2	2.24479
Tulp4	1.32666e-72	10.0307	0.839	0.665	4.44458e-68	2	Tulp4	1.26165
Coq8b	1.58364e-72	1.01631	0.37	0.151	5.3055e-68	2	Coq8b	2.45033
Nebl	2.46746e-72	23.4026	0.972	0.867	8.26648e-68	2	Nebl	1.12111
Ankrd55	4.7991e-72	7.24307	0.676	0.431	1.60779e-67	2	Ankrd55	1.56845
Slc30a10	7.58705e-72	0.504722	0.211	0.057	2.54181e-67	2	Slc30a10	3.70175
Gm11417	3.29375e-71	5.74285	0.579	0.314	1.10347e-66	2	Gm11417	1.84395
Fhl2	6.43397e-71	0.813304	0.149	0.03	2.15551e-66	2	Fhl2	4.96667
Prokr2	2.95496e-69	1.40224	0.414	0.185	9.89972e-65	2	Prokr2	2.23784
Tnfsf13b	3.84013e-69	0.956552	0.332	0.129	1.28652e-64	2	Tnfsf13b	2.57364
Gm44079	5.5632e-69	0.501681	0.117	0.019	1.86378e-64	2	Gm44079	6.15789
Cacng8	6.80238e-69	1.4801	0.608	0.357	2.27893e-64	2	Cacng8	1.70308
Gm13052	7.80623e-68	2.94456	0.605	0.357	2.61524e-63	2	Gm13052	1.69468
Map3k14	8.64294e-67	0.965514	0.428	0.197	2.89556e-62	2	Map3k14	2.17259
Gm15563	1.30609e-66	1.1211	0.359	0.149	4.37566e-62	2	Gm15563	2.4094
Sipa1l1	6.89281e-66	3.74893	0.714	0.485	2.30923e-61	2	Sipa1l1	1.47216
2810404M03Rik	9.7776e-65	2.1647	0.225	0.069	3.27569e-60	2	2810404M03Rik	3.26087
Anxa2	2.59645e-64	0.640982	0.164	0.039	8.69861e-60	2	Anxa2	4.20513
Ablim2	2.90685e-64	3.24256	0.766	0.561	9.73851e-60	2	Ablim2	1.36542
Lpar1	7.08164e-64	3.56464	0.366	0.154	2.37249e-59	2	Lpar1	2.37662
Zfp532	1.7023e-63	21.2322	0.875	0.746	5.70306e-59	2	Zfp532	1.17292
Mob3b	4.94743e-63	3.35274	0.407	0.187	1.65749e-58	2	Mob3b	2.17647
Mylip	5.16603e-63	0.709956	0.311	0.122	1.73072e-58	2	Mylip	2.54918
Fam135b	6.7767e-63	6.53856	0.849	0.687	2.27033e-58	2	Fam135b	1.23581
Tbc1d161	1.94142e-62	2.75481	0.552	0.318	6.50413e-58	2	Tbc1d16	1.73585
Steap2	2.16581e-62	1.48383	0.316	0.126	7.25591e-58	2	Steap2	2.50794
Megf6	1.0412e-61	0.674712	0.296	0.112	3.48823e-57	2	Megf6	2.64286
Fgd3	2.7966e-61	1.35482	0.389	0.174	9.36916e-57	2	Fgd3	2.23563
Dnah1	2.82769e-61	1.25265	0.335	0.138	9.47334e-57	2	Dnah1	2.42754
Rasal1	5.33249e-61	0.602481	0.507	0.272	1.78649e-56	2	Rasal1	1.86397
Rflna	6.22281e-61	0.907591	0.217	0.067	2.08477e-56	2	Rflna	3.23881
Pvt11	3.05798e-60	0.766798	0.795	0.575	1.02448e-55	2	Pvt1	1.38261
Rasa41	6.14953e-60	0.872746	0.356	0.153	2.06022e-55	2	Rasa4	2.3268
Crot	1.54037e-59	1.73796	0.449	0.228	5.16056e-55	2	Crot	1.9693
Gm12239	2.93049e-59	0.91528	0.654	0.403	9.81772e-55	2	Gm12239	1.62283
Cntn4	3.01804e-59	101.308	0.998	0.911	1.0111e-54	2	Cntn4	1.0955
Medag	1.59612e-58	1.66472	0.412	0.201	5.34732e-54	2	Medag	2.04975
Pde9a1	2.37731e-58	2.7641	0.698	0.494	7.96446e-54	2	Pde9a	1.41296
Kazn	2.70873e-58	2.25175	0.573	0.351	9.07478e-54	2	Kazn	1.63248
Tnks	4.63724e-58	1.13861	0.849	0.716	1.55357e-53	2	Tnks	1.18575
B4galnt2	7.13724e-58	20.091	0.13	0.028	2.39112e-53	2	B4galnt2	4.64286
Gldn	8.52258e-58	0.992352	0.232	0.078	2.85523e-53	2	Gldn	2.97436
Gm15283	3.45488e-57	7.55621	0.63	0.395	1.15746e-52	2	Gm15283	1.59494
Gsto1	2.11001e-56	7.0903	0.236	0.082	7.06897e-52	2	Gsto1	2.87805
Ak8	4.04389e-56	0.671766	0.294	0.117	1.35478e-51	2	Ak8	2.51282
Shisa4	4.65745e-56	2.69871	0.517	0.305	1.56034e-51	2	Shisa4	1.69508
Lrrc4	6.7277e-56	4.57999	0.808	0.618	2.25391e-51	2	Lrrc4	1.30744
Thbs3	7.44411e-56	1.10324	0.266	0.1	2.49392e-51	2	Thbs3	2.66
Rps6ka2	1.55414e-53	5.50978	0.747	0.528	5.20669e-49	2	Rps6ka2	1.41477
Gm49267	2.16204e-53	0.63153	0.125	0.027	7.24327e-49	2	Gm49267	4.62963
Zbtb20	1.58734e-52	4.64566	0.968	0.894	5.3179e-48	2	Zbtb20	1.08277
Cd2471	2.8365e-52	2.83688	0.131	0.367	9.50284e-48	2	Cd247	0.356948
Cyp7b1	7.67597e-52	0.506316	0.559	0.338	2.5716e-47	2	Cyp7b1	1.65385
Sema3a	8.47125e-52	4.515	0.339	0.151	2.83804e-47	2	Sema3a	2.24503
Zdhhc23	1.28052e-51	1.16241	0.406	0.202	4.29001e-47	2	Zdhhc23	2.0099
Mbd2	1.32982e-51	6.31078	0.735	0.538	4.45516e-47	2	Mbd2	1.36617
Cntn6	1.38373e-51	10.9494	0.976	0.838	4.63576e-47	2	Cntn6	1.16468
Gm10848	3.21656e-51	2.17648	0.484	0.267	1.07761e-46	2	Gm10848	1.81273
Gm47728	4.13751e-51	0.573806	0.181	0.055	1.38615e-46	2	Gm47728	3.29091
Slc29a4	5.08386e-51	0.665805	0.207	0.069	1.70319e-46	2	Slc29a4	3
Bcl2	5.26434e-51	9.70604	0.729	0.507	1.76366e-46	2	Bcl2	1.43787
Exoc61	2.59119e-50	1.77236	0.76	0.552	8.68102e-46	2	Exoc6	1.37681
Cfap43	3.8826e-50	15.9557	0.2	0.066	1.30075e-45	2	Cfap43	3.0303
Tnfaip8l3	5.49985e-50	0.753918	0.13	0.031	1.84256e-45	2	Tnfaip8l3	4.19355
Drd3	8.39466e-50	2.62146	0.383	0.183	2.81238e-45	2	Drd3	2.0929
Iqca	2.37709e-49	3.4806	0.111	0.024	7.96374e-45	2	Iqca	4.625
Arhgap39	5.47434e-49	4.9759	0.828	0.693	1.83401e-44	2	Arhgap39	1.19481
Spata13	1.74004e-48	0.617008	0.259	0.103	5.82947e-44	2	Spata13	2.51456
Gm19744	1.98761e-48	1.23333	0.246	0.095	6.65891e-44	2	Gm19744	2.58947
Agpat5	6.83369e-48	4.19625	0.73	0.546	2.28942e-43	2	Agpat5	1.337
Adra1a	7.53976e-48	1.46315	0.159	0.047	2.52597e-43	2	Adra1a	3.38298
Agfg2	1.57341e-47	2.83438	0.503	0.298	5.27125e-43	2	Agfg2	1.68792
B3galt5	2.73127e-47	0.947432	0.386	0.196	9.1503e-43	2	B3galt5	1.96939
Gm13112	3.5891e-47	0.574624	0.203	0.07	1.20242e-42	2	Gm13112	2.9
Arrb1	4.17616e-47	1.24284	0.658	0.467	1.3991e-42	2	Arrb1	1.40899
Baiap2	7.3284e-47	0.50736	0.233	0.088	2.45516e-42	2	Baiap2	2.64773
Gm6999	1.44546e-46	2.17278	0.105	0.023	4.84257e-42	2	Gm6999	4.56522
Gng2	2.95432e-46	3.78944	0.799	0.656	9.89757e-42	2	Gng2	1.21799
Fnbp1l	4.79501e-46	5.0814	0.904	0.755	1.60642e-41	2	Fnbp1l	1.19735
Dynlt1a	5.60159e-46	0.669988	0.314	0.144	1.87664e-41	2	Dynlt1a	2.18056
Vegfc	8.39395e-46	0.838616	0.293	0.127	2.81214e-41	2	Vegfc	2.30709
Fam126a	9.63549e-46	2.77243	0.366	0.185	3.22808e-41	2	Fam126a	1.97838
Gnb4	1.1217e-45	4.80765	0.516	0.3	3.75792e-41	2	Gnb4	1.72
Ampd3	4.50823e-45	1.59534	0.454	0.262	1.51035e-40	2	Ampd3	1.73282
Gm9947	4.63452e-45	0.555027	0.189	0.064	1.55266e-40	2	Gm9947	2.95312
Sorcs2	6.2333e-45	9.32639	0.901	0.787	2.08828e-40	2	Sorcs2	1.14485
Tctex1d1	9.61066e-45	1.07693	0.173	0.056	3.21976e-40	2	Tctex1d1	3.08929
1700016K05Rik	1.45685e-44	0.950802	0.338	0.163	4.88074e-40	2	1700016K05Rik	2.07362
Traf3	2.50723e-44	9.21702	0.437	0.234	8.39971e-40	2	Traf3	1.86752
Sox13	4.34137e-44	0.813474	0.192	0.067	1.45445e-39	2	Sox13	2.86567
Sorl1	4.56553e-44	4.41889	0.766	0.592	1.52954e-39	2	Sorl1	1.29392
Rspo1	1.3444e-43	0.681074	0.324	0.153	4.50399e-39	2	Rspo1	2.11765
Cfap44	2.02568e-43	2.03613	0.324	0.152	6.78644e-39	2	Cfap44	2.13158
Chst11	2.21037e-43	4.12847	0.837	0.711	7.40517e-39	2	Chst11	1.17722
Kif26b	6.54848e-43	1.58432	0.773	0.608	2.19387e-38	2	Kif26b	1.27138
[truncated: 4,009 more rows]

## Sheet: Supplementary File 1c
Supplementary File 1c. Differential gene expression analysis for PVT neurons
genes	p_val	avg_log2FC	pct.1	pct.2	p_val_adj	cluster	gene	pct_ratio
Egflam	2.0384e-209	3.58399	0.34	0.086	6.82905e-205	PVT1	Egflam	3.95349
Egfl6	1.00254e-104	0.875665	0.204	0.057	3.35872e-100	PVT1	Egfl6	3.57895
Drd2	1.91051e-159	0.594564	0.318	0.095	6.40061e-155	PVT1	Drd2	3.34737
Hoga1	1.70772e-120	1.07169	0.255	0.078	5.72122e-116	PVT1	Hoga1	3.26923
Esr1	8.39228e-104	6.51625	0.239	0.078	2.81158e-99	PVT1	Esr1	3.0641
Mtnr1a	1.9119e-98	1.07943	0.254	0.09	6.40526e-94	PVT1	Mtnr1a	2.82222
Slc30a3	3.0492e-225	2.88252	0.514	0.19	1.02154e-220	PVT1	Slc30a3	2.70526
Arhgef26	2.48489e-139	2.82005	0.378	0.147	8.32488e-135	PVT1	Arhgef26	2.57143
Snx31	3.67626e-246	2.25191	0.594	0.235	1.23162e-241	PVT1	Snx31	2.52766
Gm48370	1.32366e-44	1.06511	0.151	0.061	4.43452e-40	PVT1	Gm48370	2.47541
Unc5b	1.10815e-168	2.43534	0.485	0.206	3.71253e-164	PVT1	Unc5b	2.35437
4933413L06Rik	1.82488e-127	0.739832	0.434	0.192	6.11371e-123	PVT1	4933413L06Rik	2.26042
Gm48281	9.03955e-58	0.570557	0.247	0.114	3.02843e-53	PVT1	Gm48281	2.16667
Ptger3	1.26273e-93	1.06514	0.359	0.166	4.23041e-89	PVT1	Ptger3	2.16265
Sema5b	2.04478e-90	3.22208	0.37	0.173	6.85041e-86	PVT1	Sema5b	2.13873
Mkx	2.98312e-132	5.21048	0.493	0.231	9.99406e-128	PVT1	Mkx	2.1342
9130019P16Rik	2.39865e-77	1.5084	0.31	0.147	8.03594e-73	PVT1	9130019P16Rik	2.10884
Adgrg2	2.65262e-70	2.37911	0.301	0.143	8.88682e-66	PVT1	Adgrg2	2.1049
Oprk1	3.97047e-150	1.36697	0.534	0.256	1.33019e-145	PVT1	Oprk1	2.08594
4930598N05Rik	9.16565e-86	1.95599	0.376	0.188	3.07068e-81	PVT1	4930598N05Rik	2
Car8	8.14207e-69	0.621634	0.345	0.176	2.72775e-64	PVT1	Car8	1.96023
Jph1	1.22649e-110	0.952961	0.492	0.253	4.10898e-106	PVT1	Jph1	1.94466
Mcub	5.98502e-111	1.55985	0.487	0.251	2.0051e-106	PVT1	Mcub	1.94024
Mcf2	2.10761e-130	0.686073	0.564	0.296	7.06092e-126	PVT1	Mcf2	1.90541
Pter	2.22531e-47	0.568267	0.275	0.146	7.45524e-43	PVT1	Pter	1.88356
Pcsk5	0	24.7773	0.91	0.485	0	PVT1	Pcsk5	1.87629
BC028471	5.91648e-37	0.520011	0.225	0.12	1.98214e-32	PVT1	BC028471	1.875
Bdnf	2.96496e-74	11.8974	0.421	0.225	9.93319e-70	PVT1	Bdnf	1.87111
Lemd1	3.44448e-115	1.39995	0.526	0.282	1.15397e-110	PVT1	Lemd1	1.86525
Tns3	3.25459e-34	0.55212	0.213	0.115	1.09035e-29	PVT1	Tns3	1.85217
Fbln1	9.67085e-157	2.50115	0.624	0.337	3.23993e-152	PVT1	Fbln1	1.85163
Gm28376	9.16979e-157	1.57274	0.648	0.35	3.07206e-152	PVT1	Gm28376	1.85143
Gm50214	4.03528e-23	0.587888	0.148	0.08	1.3519e-18	PVT1	Gm50214	1.85
Prlr	5.75112e-99	2.26856	0.504	0.273	1.92674e-94	PVT1	Prlr	1.84615
Ralb	4.67982e-50	0.688073	0.3	0.164	1.56783e-45	PVT1	Ralb	1.82927
Cda	1.47169e-53	0.686078	0.33	0.181	4.93045e-49	PVT1	Cda	1.8232
5830444B04Rik	1.09679e-41	0.611441	0.263	0.145	3.67447e-37	PVT1	5830444B04Rik	1.81379
Gm15345	1.28233e-89	3.77108	0.479	0.268	4.29606e-85	PVT1	Gm15345	1.78731
Slc9b2	3.18893e-81	1.11247	0.466	0.265	1.06836e-76	PVT1	Slc9b2	1.75849
Cobll1	3.7874e-22	1.70889	0.172	0.098	1.26886e-17	PVT1	Cobll1	1.7551
Sfmbt2	3.70289e-115	1.71299	0.589	0.342	1.24054e-110	PVT1	Sfmbt2	1.72222
Nectin1	3.49046e-39	0.519802	0.288	0.168	1.16937e-34	PVT1	Nectin1	1.71429
Gm13584	1.69727e-26	0.517785	0.209	0.122	5.6862e-22	PVT1	Gm13584	1.71311
Gulp1	4.05121e-275	1.62499	0.882	0.515	1.35724e-270	PVT1	Gulp1	1.71262
Ptpn13	3.71517e-68	4.36534	0.451	0.267	1.24466e-63	PVT1	Ptpn13	1.68914
5730419F03Rik	1.0469e-21	0.812097	0.187	0.111	3.50731e-17	PVT1	5730419F03Rik	1.68468
Cbln4	3.02326e-28	5.2563	0.232	0.138	1.01285e-23	PVT1	Cbln4	1.68116
Doc2b	3.07791e-65	1.09948	0.445	0.265	1.03116e-60	PVT1	Doc2b	1.67925
Hcn1	0	19.0048	0.944	0.563	0	PVT1	Hcn1	1.67673
Prrg1	1.39837e-34	2.44616	0.287	0.172	4.68483e-30	PVT1	Prrg1	1.6686
Ust	1.23373e-62	1.45776	0.468	0.283	4.13323e-58	PVT1	Ust	1.65371
Exph5	2.76462e-56	1.73396	0.418	0.254	9.26203e-52	PVT1	Exph5	1.64567
Glis1	4.60936e-44	1.89164	0.394	0.24	1.54423e-39	PVT1	Glis1	1.64167
Prtg	7.00186e-18	0.797862	0.172	0.106	2.34576e-13	PVT1	Prtg	1.62264
Myo1e	3.90522e-41	2.60876	0.361	0.223	1.30833e-36	PVT1	Myo1e	1.61883
Syt17	4.80189e-202	3.94071	0.842	0.525	1.60873e-197	PVT1	Syt17	1.60381
Ndrg1	9.9462e-58	5.81623	0.444	0.277	3.33218e-53	PVT1	Ndrg1	1.60289
Gm12027	1.09688e-81	1.85532	0.561	0.35	3.67475e-77	PVT1	Gm12027	1.60286
Parva	5.0448e-12	2.15206	0.123	0.077	1.69011e-07	PVT1	Parva	1.5974
Atg7	9.85116e-176	4.46476	0.735	0.462	3.30034e-171	PVT1	Atg7	1.59091
Rph3al	5.32715e-41	0.668188	0.377	0.238	1.7847e-36	PVT1	Rph3al	1.58403
Lhx2	6.99982e-53	0.735613	0.458	0.29	2.34508e-48	PVT1	Lhx2	1.57931
A430090L17Rik	1.69221e-59	2.74894	0.465	0.297	5.66923e-55	PVT1	A430090L17Rik	1.56566
Epb41l4a	6.12762e-235	8.46181	0.849	0.543	2.05288e-230	PVT1	Epb41l4a	1.56354
Gm12828	2.05352e-80	5.14836	0.595	0.381	6.87969e-76	PVT1	Gm12828	1.56168
Dclk3	2.92616e-42	0.717645	0.406	0.261	9.80322e-38	PVT1	Dclk3	1.55556
C1ql3	1.28748e-203	5.53109	0.887	0.571	4.31331e-199	PVT1	C1ql3	1.55342
4930590L20Rik	3.31309e-52	2.12436	0.469	0.303	1.10995e-47	PVT1	4930590L20Rik	1.54785
Dsel	7.37598e-75	0.663141	0.572	0.372	2.4711e-70	PVT1	Dsel	1.53763
Gm42948	1.038e-39	1.00193	0.387	0.252	3.47751e-35	PVT1	Gm42948	1.53571
Dgat2	1.18181e-42	0.576794	0.408	0.266	3.95929e-38	PVT1	Dgat2	1.53383
Gm32618	5.23988e-55	0.993052	0.493	0.322	1.75546e-50	PVT1	Gm32618	1.53106
Angpt2	8.39978e-69	4.07789	0.554	0.362	2.81409e-64	PVT1	Angpt2	1.53039
Gckr	2.01927e-26	0.593106	0.303	0.198	6.76496e-22	PVT1	Gckr	1.5303
1500035N22Rik	3.87698e-25	0.688383	0.28	0.183	1.29887e-20	PVT1	1500035N22Rik	1.53005
Hrh3	4.27719e-55	0.715522	0.494	0.327	1.43294e-50	PVT1	Hrh3	1.5107
Ankrd35	1.17017e-13	1.0424	0.175	0.116	3.9203e-09	PVT1	Ankrd35	1.50862
Gm29088	5.23071e-11	1.29708	0.143	0.095	1.75239e-06	PVT1	Gm29088	1.50526
Nek10	8.50965e-63	1.60574	0.625	0.416	2.8509e-58	PVT1	Nek10	1.5024
Timp4	7.16181e-116	5.85998	0.709	0.473	2.39935e-111	PVT1	Timp4	1.49894
Phyhd1	4.72922e-16	0.540575	0.211	0.141	1.58438e-11	PVT1	Phyhd1	1.49645
Fam210b	5.99693e-33	0.670639	0.365	0.244	2.00909e-28	PVT1	Fam210b	1.4959
Ankrd46	4.42458e-27	0.517887	0.323	0.219	1.48232e-22	PVT1	Ankrd46	1.47489
Cpne6	5.4407e-52	0.729758	0.523	0.355	1.82274e-47	PVT1	Cpne6	1.47324
4833422C13Rik	3.07706e-27	0.785614	0.343	0.233	1.03088e-22	PVT1	4833422C13Rik	1.4721
Lmo7	2.18931e-180	2.62423	0.847	0.578	7.33462e-176	PVT1	Lmo7	1.4654
Runx2	9.33728e-72	0.939679	0.64	0.437	3.12817e-67	PVT1	Runx2	1.46453
Stox1	6.32102e-40	3.00355	0.432	0.295	2.11767e-35	PVT1	Stox1	1.46441
Gm27153	1.54049e-42	2.06026	0.47	0.321	5.16094e-38	PVT1	Gm27153	1.46417
Gm19303	3.53513e-34	4.55709	0.448	0.306	1.18434e-29	PVT1	Gm19303	1.46405
Insyn2b	1.70716e-43	7.15075	0.47	0.323	5.71932e-39	PVT1	Insyn2b	1.45511
Lin9	5.77833e-19	0.639368	0.265	0.183	1.93586e-14	PVT1	Lin9	1.44809
Gm28905	9.87295e-304	1.64199	0.958	0.663	3.30764e-299	PVT1	Gm28905	1.44495
Plekha7	3.03838e-114	1.30306	0.776	0.538	1.01792e-109	PVT1	Plekha7	1.44238
Hsd17b7	2.78686e-23	0.65588	0.321	0.223	9.33655e-19	PVT1	Hsd17b7	1.43946
Gm48239	2.47705e-20	0.571205	0.302	0.212	8.2986e-16	PVT1	Gm48239	1.42453
Alpk1	3.21233e-10	0.651652	0.175	0.123	1.07619e-05	PVT1	Alpk1	1.42276
Sptb	9.20035e-110	4.35597	0.766	0.542	3.0823e-105	PVT1	Sptb	1.41328
Cfap74	1.19041e-72	3.12659	0.67	0.475	3.98812e-68	PVT1	Cfap74	1.41053
Crb1	3.70666e-100	9.11904	0.743	0.527	1.24181e-95	PVT1	Crb1	1.40987
Adamts10	8.53974e-22	0.583268	0.331	0.235	2.86098e-17	PVT1	Adamts10	1.40851
Plxna2	1.2317e-146	3.26794	0.822	0.585	4.12645e-142	PVT1	Plxna2	1.40513
Adcyap1r1	4.50067e-49	0.539512	0.563	0.401	1.50781e-44	PVT1	Adcyap1r1	1.40399
Slc7a8	1.45375e-139	20.6891	0.829	0.591	4.87034e-135	PVT1	Slc7a8	1.40271
Tbc1d8	3.94825e-51	2.16914	0.575	0.41	1.32274e-46	PVT1	Tbc1d8	1.40244
Grik3	7.87728e-58	1.23655	0.638	0.457	2.63905e-53	PVT1	Grik3	1.39606
Dnajc21	2.34337e-43	1.11399	0.521	0.375	7.85074e-39	PVT1	Dnajc21	1.38933
Gm44643	4.30251e-37	0.821385	0.497	0.358	1.44143e-32	PVT1	Gm44643	1.38827
Rap1gap2	1.14766e-151	9.03546	0.857	0.624	3.8449e-147	PVT1	Rap1gap2	1.3734
Prox1	7.80547e-90	7.94225	0.817	0.595	2.61499e-85	PVT1	Prox1	1.37311
Gm45645	3.38003e-31	1.59284	0.459	0.335	1.13238e-26	PVT1	Gm45645	1.37015
Flrt1	6.08056e-40	1.19558	0.547	0.4	2.03711e-35	PVT1	Flrt1	1.3675
Adcy10	7.30822e-15	0.512266	0.273	0.2	2.4484e-10	PVT1	Adcy10	1.365
Npas4	1.03107e-08	6.69484	0.158	0.116	0.000345431	PVT1	Npas4	1.36207
Epha3	2.36375e-97	5.49607	0.854	0.627	7.91904e-93	PVT1	Epha3	1.36204
Tiparp	2.00193e-27	2.91083	0.446	0.328	6.70685e-23	PVT1	Tiparp	1.35976
Gm48321	8.99854e-32	6.02069	0.52	0.384	3.01469e-27	PVT1	Gm48321	1.35417
Slit1	9.81862e-47	10.8043	0.606	0.45	3.28943e-42	PVT1	Slit1	1.34667
Idh2	1.53464e-33	0.989658	0.501	0.374	5.14136e-29	PVT1	Idh2	1.33957
Lrrc1	2.56653e-29	0.610303	0.5	0.374	8.59838e-25	PVT1	Lrrc1	1.3369
Dpy19l3	3.82859e-31	0.844157	0.508	0.38	1.28265e-26	PVT1	Dpy19l3	1.33684
Mindy3	4.49574e-54	2.30207	0.635	0.477	1.50616e-49	PVT1	Mindy3	1.33124
Gm12394	1.16899e-11	0.689003	0.251	0.189	3.91635e-07	PVT1	Gm12394	1.32804
Gm14508	1.10453e-08	1.66731	0.199	0.15	0.000370038	PVT1	Gm14508	1.32667
Scpep1	2.85715e-13	0.519232	0.294	0.222	9.57203e-09	PVT1	Scpep1	1.32432
Ldlr	9.9753e-40	24.1681	0.597	0.451	3.34192e-35	PVT1	Ldlr	1.32373
Dnah7b	9.14174e-25	7.74508	0.486	0.368	3.06267e-20	PVT1	Dnah7b	1.32065
Ldlrad3	8.00344e-23	4.46214	0.433	0.328	2.68131e-18	PVT1	Ldlrad3	1.32012
Snx9	3.76078e-40	2.02015	0.597	0.453	1.25994e-35	PVT1	Snx9	1.31788
Sqle	2.55787e-40	0.831625	0.606	0.46	8.56936e-36	PVT1	Sqle	1.31739
Gm20658	1.34197e-10	2.94832	0.255	0.194	4.49586e-06	PVT1	Gm20658	1.31443
Gm1992	1.55308e-98	10.1341	0.856	0.653	5.20314e-94	PVT1	Gm1992	1.31087
Ddah1	7.02995e-97	8.0105	0.859	0.657	2.35517e-92	PVT1	Ddah1	1.30746
Ttc28	9.27715e-106	1.46631	0.886	0.678	3.10803e-101	PVT1	Ttc28	1.30678
Gfod1	7.04603e-45	2.44138	0.695	0.532	2.36056e-40	PVT1	Gfod1	1.30639
Gm28750	1.90944e-22	2.47948	0.472	0.362	6.397e-18	PVT1	Gm28750	1.30387
Dusp14	1.94859e-09	0.617346	0.245	0.188	6.52818e-05	PVT1	Dusp14	1.30319
Gm2087	1.48667e-14	1.33518	0.349	0.268	4.98063e-10	PVT1	Gm2087	1.30224
Flt3	1.13323e-18	0.590024	0.463	0.356	3.79655e-14	PVT1	Flt3	1.30056
Kcnq5	2.51714e-252	23.2649	0.995	0.767	8.43293e-248	PVT1	Kcnq5	1.29726
Mpzl1	1.44951e-20	1.60567	0.46	0.356	4.85615e-16	PVT1	Mpzl1	1.29213
Sema6d	1.57506e-274	6.02319	0.968	0.75	5.27678e-270	PVT1	Sema6d	1.29067
St6gal2	6.38458e-58	1.41489	0.724	0.561	2.13896e-53	PVT1	St6gal2	1.29055
Clcn5	3.18452e-17	0.581385	0.397	0.308	1.06688e-12	PVT1	Clcn5	1.28896
Gm37768	1.1472e-14	1.44963	0.371	0.288	3.84334e-10	PVT1	Gm37768	1.28819
Tmem132c	4.47242e-20	1.23594	0.652	0.507	1.49835e-15	PVT1	Tmem132c	1.286
Mcph1	2.64179e-68	6.3182	0.742	0.577	8.85053e-64	PVT1	Mcph1	1.28596
Nr3c2	2.0376e-71	5.90359	0.778	0.605	6.82635e-67	PVT1	Nr3c2	1.28595
Gm43915	8.0162e-17	1.33676	0.419	0.326	2.68559e-12	PVT1	Gm43915	1.28528
Klhl10	8.01416e-13	0.582733	0.331	0.258	2.68491e-08	PVT1	Klhl10	1.28295
Bhlhe40	7.2272e-07	2.66829	0.191	0.149	0.0242126	PVT1	Bhlhe40	1.28188
Osbpl10	2.54906e-64	2.51298	0.76	0.593	8.53986e-60	PVT1	Osbpl10	1.28162
Gm14858	3.37852e-13	0.541347	0.346	0.27	1.13187e-08	PVT1	Gm14858	1.28148
Gm44644	1.45238e-14	1.11473	0.363	0.285	4.86575e-10	PVT1	Gm44644	1.27368
Dab2ip	2.04378e-80	3.62889	0.818	0.644	6.84706e-76	PVT1	Dab2ip	1.27019
Chst10	4.30299e-29	0.944916	0.566	0.446	1.44159e-24	PVT1	Chst10	1.26906
Fdft1	4.30901e-27	1.60871	0.573	0.454	1.4436e-22	PVT1	Fdft1	1.26211
Adam19	4.1942e-15	1.53672	0.406	0.322	1.40514e-10	PVT1	Adam19	1.26087
Rogdi	1.41297e-20	1.32964	0.5	0.398	4.73374e-16	PVT1	Rogdi	1.25628
Aim2	8.79687e-10	0.525397	0.29	0.231	2.94713e-05	PVT1	Aim2	1.25541
Lclat1	3.44552e-25	0.845458	0.549	0.438	1.15432e-20	PVT1	Lclat1	1.25342
Eif2ak3	1.50508e-11	0.755209	0.373	0.298	5.04232e-07	PVT1	Eif2ak3	1.25168
Insig2	7.35337e-24	0.664631	0.52	0.416	2.46352e-19	PVT1	Insig2	1.25
Gm20754	2.38952e-128	10.9983	0.963	0.772	8.00538e-124	PVT1	Gm20754	1.24741
Arhgap20	2.8727e-15	3.68044	0.439	0.352	9.62413e-11	PVT1	Arhgap20	1.24716
Eif4e3	5.08314e-09	0.571644	0.303	0.243	0.000170295	PVT1	Eif4e3	1.24691
Spats2l	1.07538e-22	2.57271	0.59	0.474	3.60273e-18	PVT1	Spats2l	1.24473
Pkig	5.198e-16	1.03467	0.443	0.356	1.74143e-11	PVT1	Pkig	1.24438
Tacc2	1.04355e-18	5.28865	0.511	0.411	3.49609e-14	PVT1	Tacc2	1.24331
Zranb3	1.94513e-07	1.28818	0.266	0.214	0.00651657	PVT1	Zranb3	1.24299
Arhgap17	8.22247e-36	0.51967	0.661	0.532	2.75469e-31	PVT1	Arhgap17	1.24248
N4bp2	5.93279e-13	1.45766	0.407	0.328	1.9876e-08	PVT1	N4bp2	1.24085
Herc3	1.95874e-27	3.26304	0.655	0.528	6.56218e-23	PVT1	Herc3	1.24053
Robo2	8.5329e-58	7.25501	0.861	0.695	2.85869e-53	PVT1	Robo2	1.23885
Begain	1.42978e-13	0.52594	0.415	0.335	4.79005e-09	PVT1	Begain	1.23881
Peli1	7.98038e-26	6.4287	0.585	0.473	2.67359e-21	PVT1	Peli1	1.23679
Cstf2	2.06808e-24	0.709694	0.587	0.475	6.92847e-20	PVT1	Cstf2	1.23579
Gm10125	2.0221e-17	9.23348	0.513	0.416	6.77444e-13	PVT1	Gm10125	1.23317
D030068K23Rik	1.72269e-100	3.06737	0.934	0.759	5.77137e-96	PVT1	D030068K23Rik	1.23057
Rsu1	2.23227e-22	1.97866	0.582	0.474	7.47856e-18	PVT1	Rsu1	1.22785
Klf8	5.60464e-26	2.42221	0.632	0.515	1.87767e-21	PVT1	Klf8	1.22718
Pde4a	4.22346e-24	3.54632	0.603	0.492	1.41494e-19	PVT1	Pde4a	1.22561
Galnt16	2.26718e-36	3.25144	0.712	0.582	7.59551e-32	PVT1	Galnt16	1.22337
Lca5	2.69454e-16	0.731655	0.521	0.427	9.02724e-12	PVT1	Lca5	1.22014
Hfm1	1.02542e-06	1.00604	0.283	0.232	0.0343537	PVT1	Hfm1	1.21983
Gm38604	4.87906e-12	0.801781	0.429	0.352	1.63458e-07	PVT1	Gm38604	1.21875
Exoc6	9.67735e-29	0.657441	0.663	0.544	3.24211e-24	PVT1	Exoc6	1.21875
Scn3b	5.50502e-28	0.591688	0.627	0.515	1.84429e-23	PVT1	Scn3b	1.21748
Epb41	3.26873e-20	4.9608	0.618	0.508	1.09509e-15	PVT1	Epb41	1.21654
Suco	2.27481e-52	1.0831	0.759	0.627	7.62107e-48	PVT1	Suco	1.21053
Gm27032	2.33314e-11	1.41187	0.41	0.339	7.81649e-07	PVT1	Gm27032	1.20944
2023-03-08	5.35474e-13	0.854949	0.43	0.356	1.79394e-08	PVT1	2023-03-08	1.20787
Sesn3	2.81138e-28	0.724834	0.694	0.575	9.41869e-24	PVT1	Sesn3	1.20696
Uck2	2.72093e-11	0.831963	0.415	0.344	9.11565e-07	PVT1	Uck2	1.2064
Atf7	1.8472e-11	1.66799	0.48	0.398	6.1885e-07	PVT1	Atf7	1.20603
Rsf1os1	8.90851e-11	0.666088	0.423	0.351	2.98453e-06	PVT1	Rsf1os1	1.20513
Pcmtd2	2.21756e-31	0.907303	0.715	0.595	7.42927e-27	PVT1	Pcmtd2	1.20168
Slc1a2	9.1938e-134	4.14955	0.955	0.796	3.08011e-129	PVT1	Slc1a2	1.19975
Galnt11	2.92929e-29	1.17935	0.681	0.568	9.81372e-25	PVT1	Galnt11	1.19894
Gm47423	1.65286e-08	11.3847	0.34	0.284	0.000553741	PVT1	Gm47423	1.19718
Pgm2l1	6.05178e-29	1.17312	0.701	0.587	2.02747e-24	PVT1	Pgm2l1	1.19421
Zbtb38	2.55895e-60	2.51578	0.818	0.685	8.573e-56	PVT1	Zbtb38	1.19416
Znrf3	2.53928e-30	1.12433	0.71	0.595	8.50711e-26	PVT1	Znrf3	1.19328
Gm7854	2.58477e-12	4.13118	0.51	0.428	8.6595e-08	PVT1	Gm7854	1.19159
Prickle1	4.28065e-120	0.915799	0.966	0.811	1.4341e-115	PVT1	Prickle1	1.19112
Ubap2	1.23897e-22	1.30072	0.644	0.541	4.15078e-18	PVT1	Ubap2	1.19039
Vsnl1	2.89003e-83	7.10013	0.93	0.782	9.68218e-79	PVT1	Vsnl1	1.18926
Irs2	2.53507e-08	1.09388	0.346	0.291	0.000849298	PVT1	Irs2	1.189
Gm17106	1.97106e-11	0.637297	0.489	0.412	6.60344e-07	PVT1	Gm17106	1.18689
Gm48765	4.03545e-09	2.06717	0.409	0.345	0.000135196	PVT1	Gm48765	1.18551
Hdac1	1.10981e-06	0.739416	0.33	0.279	0.0371809	PVT1	Hdac1	1.1828
Mospd2	1.24653e-06	0.679653	0.339	0.287	0.0417613	PVT1	Mospd2	1.18118
Efcab1	4.61399e-09	6.67424	0.499	0.423	0.000154578	PVT1	Efcab1	1.17967
Stx3	6.38999e-18	0.518975	0.614	0.521	2.14078e-13	PVT1	Stx3	1.1785
Dpysl5	1.2225e-38	1.19135	0.809	0.687	4.09561e-34	PVT1	Dpysl5	1.17758
Minpp1	7.02802e-08	0.70196	0.4	0.34	0.00235453	PVT1	Minpp1	1.17647
Fbxo42	3.13013e-13	1.46463	0.566	0.482	1.04866e-08	PVT1	Fbxo42	1.17427
1810034E14Rik	6.8253e-12	2.33619	0.499	0.425	2.28661e-07	PVT1	1810034E14Rik	1.17412
Stim2	1.30221e-14	1.08427	0.602	0.513	4.36265e-10	PVT1	Stim2	1.17349
Wdr78	1.28589e-08	0.679615	0.433	0.369	0.000430798	PVT1	Wdr78	1.17344
Synrg	6.20353e-23	4.05618	0.688	0.587	2.07831e-18	PVT1	Synrg	1.17206
Zdbf2	4.86012e-15	4.57766	0.605	0.517	1.62824e-10	PVT1	Zdbf2	1.17021
Tent4b	7.1687e-08	2.78671	0.454	0.388	0.00240166	PVT1	Tent4b	1.1701
Mgat5b	6.44547e-15	2.41757	0.739	0.632	2.15936e-10	PVT1	Mgat5b	1.1693
Sae1	1.10625e-07	1.1278	0.435	0.373	0.00370616	PVT1	Sae1	1.16622
Zfp318	1.96079e-10	0.945965	0.506	0.434	6.56905e-06	PVT1	Zfp318	1.1659
Nudt5	1.85781e-08	0.835788	0.44	0.378	0.000622403	PVT1	Nudt5	1.16402
Abat	8.63625e-20	0.638555	0.661	0.568	2.89332e-15	PVT1	Abat	1.16373
Grb14	8.84047e-18	10.0721	0.662	0.569	2.96173e-13	PVT1	Grb14	1.16344
6030443J06Rik	3.78643e-07	2.06167	0.406	0.349	0.0126853	PVT1	6030443J06Rik	1.16332
Hivep1	8.60474e-10	0.664854	0.515	0.443	2.88276e-05	PVT1	Hivep1	1.16253
Mlxip	7.81802e-08	1.5753	0.437	0.376	0.00261919	PVT1	Mlxip	1.16223
Sfmbt1	2.01559e-14	2.09188	0.638	0.549	6.75265e-10	PVT1	Sfmbt1	1.16211
Maco1	2.50146e-13	0.724026	0.582	0.501	8.38041e-09	PVT1	Maco1	1.16168
4930488L21Rik	9.07972e-07	1.45003	0.389	0.335	0.0304189	PVT1	4930488L21Rik	1.16119
Smarca2	1.75928e-45	1.2597	0.877	0.758	5.89393e-41	PVT1	Smarca2	1.15699
Cables1	3.16381e-07	14.1421	0.5	0.433	0.0105994	PVT1	Cables1	1.15473
Jdp2	2.10647e-07	5.0683	0.421	0.365	0.00705708	PVT1	Jdp2	1.15342
Alg9	1.66173e-07	1.17977	0.407	0.353	0.00556712	PVT1	Alg9	1.15297
Brinp3	1.5371e-42	24.7759	0.974	0.845	5.1496e-38	PVT1	Brinp3	1.15266
Npc1	3.85348e-09	1.13611	0.506	0.439	0.000129099	PVT1	Npc1	1.15262
C2cd2	7.99979e-09	2.18042	0.493	0.428	0.000268009	PVT1	C2cd2	1.15187
Rab11fip4	1.02566e-12	0.511256	0.625	0.543	3.43618e-08	PVT1	Rab11fip4	1.15101
Acsl4	1.369e-14	1.26489	0.65	0.566	4.58643e-10	PVT1	Acsl4	1.14841
Brwd3	8.329e-08	0.505848	0.458	0.399	0.00279038	PVT1	Brwd3	1.14787
Gm10785	2.83571e-14	1.87419	0.624	0.544	9.50019e-10	PVT1	Gm10785	1.14706
Sh3pxd2a	7.51249e-07	0.580324	0.473	0.413	0.0251683	PVT1	Sh3pxd2a	1.14528
Rnf38	1.0094e-09	0.607393	0.571	0.499	3.38169e-05	PVT1	Rnf38	1.14429
Abca3	1.47438e-19	0.572021	0.73	0.638	4.93946e-15	PVT1	Abca3	1.1442
Fam120a	9.45571e-16	1.13953	0.692	0.605	3.16785e-11	PVT1	Fam120a	1.1438
Cers6	3.91204e-15	11.5758	0.764	0.668	1.31061e-10	PVT1	Cers6	1.14371
Syngr1	3.6719e-14	0.78053	0.625	0.547	1.23016e-09	PVT1	Syngr1	1.1426
Ccser2	7.82548e-13	1.14979	0.643	0.563	2.62169e-08	PVT1	Ccser2	1.1421
Elovl6	1.81213e-19	3.29442	0.719	0.63	6.07099e-15	PVT1	Elovl6	1.14127
Map4k3	8.49977e-14	1.76308	0.68	0.596	2.84759e-09	PVT1	Map4k3	1.14094
Gns	2.96349e-11	0.682202	0.55	0.483	9.92829e-07	PVT1	Gns	1.13872
Lrrfip2	5.35839e-12	1.42649	0.682	0.599	1.79517e-07	PVT1	Lrrfip2	1.13856
Arhgap23	2.11074e-09	0.791892	0.576	0.506	7.07142e-05	PVT1	Arhgap23	1.13834
Cpeb1	4.26046e-13	6.47234	0.725	0.637	1.42734e-08	PVT1	Cpeb1	1.13815
Gm32250	2.29068e-16	1.37576	0.68	0.599	7.67423e-12	PVT1	Gm32250	1.13523
Xpo4	8.43855e-08	0.612112	0.505	0.445	0.00282708	PVT1	Xpo4	1.13483
Ankrd28	4.80839e-17	0.884716	0.691	0.609	1.61091e-12	PVT1	Ankrd28	1.13465
Myo6	4.56917e-08	1.17429	0.592	0.522	0.00153076	PVT1	Myo6	1.1341
Slc16a7	3.35791e-14	1.38035	0.678	0.598	1.12497e-09	PVT1	Slc16a7	1.13378
Clasrp	8.61448e-08	0.555802	0.482	0.426	0.00288602	PVT1	Clasrp	1.13146
Myo18a	1.05394e-15	8.72626	0.752	0.665	3.53093e-11	PVT1	Myo18a	1.13083
Rab40c	2.10467e-09	4.31427	0.666	0.589	7.05106e-05	PVT1	Rab40c	1.13073
Ap2a2	6.45929e-24	2.81662	0.807	0.714	2.16399e-19	PVT1	Ap2a2	1.13025
Eps8	5.43295e-07	1.68817	0.703	0.622	0.0182015	PVT1	Eps8	1.13023
Ptpn12	2.0443e-12	1.09392	0.668	0.592	6.84882e-08	PVT1	Ptpn12	1.12838
Ago2	3.27181e-10	0.687642	0.632	0.561	1.09612e-05	PVT1	Ago2	1.12656
Cpeb2	8.12918e-17	0.681244	0.711	0.632	2.72344e-12	PVT1	Cpeb2	1.125
Gm28375	9.94817e-08	2.11846	0.505	0.449	0.00333284	PVT1	Gm28375	1.12472
Agps	3.26533e-08	0.691554	0.534	0.475	0.00109395	PVT1	Agps	1.12421
Dcx	2.63118e-07	3.08445	0.62	0.552	0.00881497	PVT1	Dcx	1.12319
Map7	6.09559e-10	10.6593	0.696	0.62	2.04214e-05	PVT1	Map7	1.12258
Iqsec1	3.05789e-55	9.49062	0.92	0.82	1.02445e-50	PVT1	Iqsec1	1.12195
Zfhx4	1.23703e-14	8.13327	0.672	0.599	4.1443e-10	PVT1	Zfhx4	1.12187
Senp2	5.32843e-07	10.0545	0.627	0.559	0.0178513	PVT1	Senp2	1.12165
Zfhx3	2.82471e-61	29.1063	0.996	0.888	9.46336e-57	PVT1	Zfhx3	1.12162
Gabrg2	7.43436e-26	1.8223	0.839	0.75	2.49066e-21	PVT1	Gabrg2	1.11867
Ppp3cc	1.19894e-06	1.68052	0.567	0.507	0.0401671	PVT1	Ppp3cc	1.11834
Usp50	3.94807e-10	4.34119	0.587	0.526	1.32268e-05	PVT1	Usp50	1.11597
Itsn2	5.62266e-09	1.14568	0.654	0.587	0.000188371	PVT1	Itsn2	1.11414
Gm19710	8.07302e-10	2.77774	0.606	0.544	2.70462e-05	PVT1	Gm19710	1.11397
Vps54	1.37923e-08	0.889534	0.637	0.572	0.00046207	PVT1	Vps54	1.11364
Syn2	2.40234e-236	34.8621	0.997	0.896	8.04832e-232	PVT1	Syn2	1.11272
Fam120b	3.24043e-10	1.50876	0.693	0.623	1.08561e-05	PVT1	Fam120b	1.11236
Rubcn	5.20348e-07	0.53269	0.516	0.464	0.0174327	PVT1	Rubcn	1.11207
Nek7	3.78182e-09	3.2644	0.747	0.672	0.000126698	PVT1	Nek7	1.11161
Gnaq	1.08916e-29	1.15982	0.899	0.809	3.64891e-25	PVT1	Gnaq	1.11125
Brinp1	2.1025e-201	1.69493	0.991	0.892	7.04381e-197	PVT1	Brinp1	1.11099
Sec24a	1.96925e-11	0.536638	0.648	0.584	6.5974e-07	PVT1	Sec24a	1.10959
Unc5c	1.69407e-31	56.447	0.996	0.898	5.67546e-27	PVT1	Unc5c	1.10913
3110021N24Rik	2.63501e-20	33.3393	0.775	0.699	8.82782e-16	PVT1	3110021N24Rik	1.10873
Mir124-2hg	1.06716e-19	1.22974	0.848	0.765	3.5752e-15	PVT1	Mir124-2hg	1.1085
Ranbp9	2.84384e-12	3.59665	0.728	0.657	9.52742e-08	PVT1	Ranbp9	1.10807
Mapk8	5.48954e-13	0.703938	0.814	0.736	1.83911e-08	PVT1	Mapk8	1.10598
Plekha5	4.5602e-55	1.08466	0.963	0.871	1.52776e-50	PVT1	Plekha5	1.10563
Podxl2	5.08804e-19	1.31071	0.733	0.663	1.70459e-14	PVT1	Podxl2	1.10558
Btaf1	6.47934e-09	2.60438	0.703	0.636	0.000217071	PVT1	Btaf1	1.10535
Ahcyl1	8.82293e-10	0.975374	0.719	0.651	2.95586e-05	PVT1	Ahcyl1	1.10445
Cadps	7.43129e-106	7.46589	0.994	0.901	2.48963e-101	PVT1	Cadps	1.10322
Map6	3.32769e-12	7.4222	0.815	0.739	1.11484e-07	PVT1	Map6	1.10284
Rcan2	1.88084e-41	0.647371	0.937	0.85	6.3012e-37	PVT1	Rcan2	1.10235
Spire1	1.23005e-18	2.83381	0.831	0.756	4.12093e-14	PVT1	Spire1	1.09921
Senp7	1.35435e-11	2.60342	0.816	0.743	4.53736e-07	PVT1	Senp7	1.09825
Tsc22d2	7.51291e-07	1.16553	0.59	0.538	0.0251697	PVT1	Tsc22d2	1.09665
Abi1	1.63515e-07	0.826898	0.648	0.591	0.00547808	PVT1	Abi1	1.09645
Tmem87b	2.96614e-07	0.974445	0.513	0.468	0.00993718	PVT1	Tmem87b	1.09615
Sik2	3.93779e-09	2.50875	0.65	0.594	0.000131924	PVT1	Sik2	1.09428
Vps13c	3.82059e-10	8.63506	0.795	0.728	1.27997e-05	PVT1	Vps13c	1.09203
Hdac8	1.88837e-15	5.51436	0.839	0.769	6.32641e-11	PVT1	Hdac8	1.09103
Gm20275	3.21095e-23	2.89112	0.842	0.772	1.07573e-18	PVT1	Gm20275	1.09067
Mpc1	3.93219e-10	2.74845	0.755	0.694	1.31736e-05	PVT1	Mpc1	1.0879
Cask	1.12077e-23	1.22776	0.904	0.832	3.75481e-19	PVT1	Cask	1.08654
Fam135a	3.59841e-08	9.7798	0.68	0.626	0.00120554	PVT1	Fam135a	1.08626
Syn3	2.72033e-09	3.13648	0.809	0.747	9.11365e-05	PVT1	Syn3	1.083
Ptbp2	1.44267e-13	1.65513	0.801	0.74	4.83323e-09	PVT1	Ptbp2	1.08243
Rbm4b	1.95107e-08	1.3972	0.659	0.609	0.000653647	PVT1	Rbm4b	1.0821
Gabra2	7.07174e-97	4.69564	0.978	0.905	2.36917e-92	PVT1	Gabra2	1.08066
Amph	3.28351e-109	4.52802	0.98	0.907	1.10004e-104	PVT1	Amph	1.08049
Sos1	5.59346e-08	0.967356	0.677	0.627	0.00187392	PVT1	Sos1	1.07974
Nipbl	2.46163e-12	4.30444	0.844	0.783	8.24694e-08	PVT1	Nipbl	1.07791
Drg1	3.88303e-07	0.911577	0.751	0.697	0.0130089	PVT1	Drg1	1.07747
Rmst	6.12623e-186	18.8012	0.998	0.927	2.05241e-181	PVT1	Rmst	1.07659
Dync1h1	5.94424e-12	3.941	0.852	0.792	1.99144e-07	PVT1	Dync1h1	1.07576
Cdkal1	2.81994e-09	4.61266	0.782	0.727	9.44737e-05	PVT1	Cdkal1	1.07565
Ube3c	2.27078e-09	5.21212	0.848	0.789	7.60757e-05	PVT1	Ube3c	1.07478
Fam117b	1.31033e-07	5.39761	0.635	0.591	0.00438987	PVT1	Fam117b	1.07445
Arl6ip1	7.91706e-19	1.51971	0.781	0.727	2.65237e-14	PVT1	Arl6ip1	1.07428
Vezt	6.08332e-11	1.42993	0.828	0.772	2.03803e-06	PVT1	Vezt	1.07254
Paip2	1.22991e-07	1.93487	0.744	0.694	0.00412046	PVT1	Paip2	1.07205
Zfp292	4.56466e-11	0.62471	0.759	0.708	1.52925e-06	PVT1	Zfp292	1.07203
Astn2	7.94078e-187	2.95453	0.99	0.927	2.66032e-182	PVT1	Astn2	1.06796
Acaca	9.1712e-15	1.36044	0.902	0.845	3.07254e-10	PVT1	Acaca	1.06746
Nsf	6.3342e-37	4.11297	0.968	0.912	2.12208e-32	PVT1	Nsf	1.0614
Herc2	9.07876e-14	11.6157	0.865	0.818	3.04157e-09	PVT1	Herc2	1.05746
Myo9a	1.53393e-16	1.46368	0.933	0.885	5.13896e-12	PVT1	Myo9a	1.05424
Eif4g3	8.15828e-09	2.44216	0.905	0.861	0.000273319	PVT1	Eif4g3	1.0511
Ulk2	6.97218e-08	0.955574	0.825	0.785	0.00233582	PVT1	Ulk2	1.05096
Arih1	9.44426e-07	3.80849	0.895	0.856	0.0316401	PVT1	Arih1	1.04556
Ube2e2	2.45813e-14	2.12206	0.965	0.924	8.23523e-10	PVT1	Ube2e2	1.04437
Rit2	2.84733e-17	4.34801	0.95	0.91	9.53911e-13	PVT1	Rit2	1.04396
Tcf7l2	2.22554e-17	3.08563	0.989	0.948	7.45602e-13	PVT1	Tcf7l2	1.04325
Kansl1	1.07124e-17	1.69511	0.957	0.928	3.58886e-13	PVT1	Kansl1	1.03125
Xkr4	3.91803e-108	1.29295	1	0.97	1.31262e-103	PVT1	Xkr4	1.03093
Pbx1	6.82123e-67	43.5328	0.992	0.966	2.28525e-62	PVT1	Pbx1	1.02692
Gpm6a	5.4484e-22	1.2187	0.981	0.96	1.82532e-17	PVT1	Gpm6a	1.02188
Magi2	7.18813e-130	43.5333	1	0.991	2.40817e-125	PVT1	Magi2	1.00908
Diaph2	1.75572e-26	2.38284	0.596	0.669	5.88203e-22	PVT1	Diaph2	0.890882
Nnat	3.09268e-13	6.02264	0.457	0.513	1.03611e-08	PVT1	Nnat	0.890838
Tgfb2	4.04371e-07	0.715877	0.212	0.261	0.0135472	PVT1	Tgfb2	0.812261
Rxfp1	8.58203e-07	2.44591	0.068	0.101	0.0287515	PVT1	Rxfp1	0.673267
Pcsk1	9.66261e-08	3.10187	0.081	0.121	0.00323717	PVT1	Pcsk1	0.669421
Greb1l	3.46083e-35	8.35705	0.246	0.376	1.15945e-30	PVT1	Greb1l	0.654255
Gm10635	2.80484e-131	1.68631	0.156	0.015	9.39678e-127	PVT2	Gm10635	10.4
St14	1.42984e-197	1.01046	0.241	0.024	4.79025e-193	PVT2	St14	10.0417
Dgkk	4.03516e-127	4.33747	0.219	0.034	1.35186e-122	PVT2	Dgkk	6.44118
Dach2	1.83254e-121	2.77272	0.249	0.046	6.13936e-117	PVT2	Dach2	5.41304
9330158H04Rik	1.49225e-98	2.60419	0.208	0.039	4.99933e-94	PVT2	9330158H04Rik	5.33333
Col12a1	0	14.0898	0.788	0.148	0	PVT2	Col12a1	5.32432
Trpm6	1.27415e-262	11.2071	0.512	0.098	4.26866e-258	PVT2	Trpm6	5.22449
Slc24a41	2.83585e-65	0.714545	0.147	0.029	9.50066e-61	PVT2	Slc24a4	5.06897
Tmem26	1.36027e-144	1.01008	0.316	0.063	4.55719e-140	PVT2	Tmem26	5.01587
Pde3a	2.30776e-139	3.02096	0.33	0.072	7.73147e-135	PVT2	Pde3a	4.58333
Crybg1	3.04701e-142	2.46251	0.36	0.084	1.02081e-137	PVT2	Crybg1	4.28571
Smoc2	4.20429e-49	1.02901	0.162	0.043	1.40852e-44	PVT2	Smoc2	3.76744
Gm391851	8.35164e-53	0.91513	0.206	0.062	2.79797e-48	PVT2	Gm39185	3.32258
Sema5b1	8.55444e-187	1.23501	0.602	0.184	2.86591e-182	PVT2	Sema5b	3.27174
5730419F03Rik1	8.28959e-96	3.05049	0.351	0.108	2.77718e-91	PVT2	5730419F03Rik	3.25
Gm20713	1.19879e-198	16.8388	0.592	0.188	4.01618e-194	PVT2	Gm20713	3.14894
Gm48648	2.89352e-51	0.694427	0.214	0.068	9.69385e-47	PVT2	Gm48648	3.14706
Arhgef5	7.95021e-50	0.751016	0.218	0.071	2.66348e-45	PVT2	Arhgef5	3.07042
Trpc6	2.12005e-75	0.538421	0.316	0.103	7.10258e-71	PVT2	Trpc6	3.06796
Neb	1.70977e-36	4.13108	0.169	0.058	5.72809e-32	PVT2	Neb	2.91379
Rskr1	8.0613e-35	1.24982	0.166	0.057	2.7007e-30	PVT2	Rskr	2.91228
Lypd6	2.8756e-153	4.95439	0.586	0.205	9.63385e-149	PVT2	Lypd6	2.85854
Gm47352	1.27017e-24	1.37001	0.128	0.046	4.25534e-20	PVT2	Gm47352	2.78261
Xylt11	3.67028e-174	3.41486	0.638	0.235	1.22962e-169	PVT2	Xylt1	2.71489
Slc44a5	4.33624e-136	4.88933	0.548	0.204	1.45273e-131	PVT2	Slc44a5	2.68627
Glis11	7.06113e-159	0.56644	0.649	0.242	2.36562e-154	PVT2	Glis1	2.68182
Pcsk11	6.71353e-40	1.95606	0.249	0.099	2.24917e-35	PVT2	Pcsk1	2.51515
Cast	3.57262e-65	1.879	0.363	0.146	1.1969e-60	PVT2	Cast	2.4863
Epb41l2	1.68616e-70	1.10777	0.407	0.165	5.64899e-66	PVT2	Epb41l2	2.46667
Igf11	1.00099e-101	1.72357	0.551	0.224	3.35351e-97	PVT2	Igf1	2.45982
A730090N16Rik	4.60507e-36	1.30164	0.233	0.095	1.54279e-31	PVT2	A730090N16Rik	2.45263
9530026P05Rik	1.16346e-21	6.75522	0.144	0.06	3.89781e-17	PVT2	9530026P05Rik	2.4
Epha1	5.48847e-40	0.859308	0.264	0.11	1.83875e-35	PVT2	Epha1	2.4
Klhl4	1.83267e-29	0.522159	0.213	0.091	6.13982e-25	PVT2	Klhl4	2.34066
Col8a1	5.85838e-54	8.30359	0.379	0.164	1.96267e-49	PVT2	Col8a1	2.31098
Iqgap21	1.32054e-45	0.767519	0.321	0.14	4.42408e-41	PVT2	Iqgap2	2.29286
Pdia5	1.99961e-168	5.3459	0.787	0.353	6.69909e-164	PVT2	Pdia5	2.22946
Tll11	6.42968e-116	4.33131	0.686	0.314	2.15407e-111	PVT2	Tll1	2.18471
Gm17151	1.77542e-34	2.40654	0.307	0.148	5.94801e-30	PVT2	Gm1715	2.07432
Lemd11	2.34965e-92	0.860142	0.645	0.311	7.87179e-88	PVT2	Lemd1	2.07395
Arhgap10	2.25532e-12	0.666443	0.12	0.058	7.55576e-08	PVT2	Arhgap10	2.06897
Tmem132cos2	3.02638e-83	0.65829	0.609	0.295	1.0139e-78	PVT2	Tmem132cos	2.06441
Ugt8a	1.38857e-13	0.654793	0.131	0.064	4.65199e-09	PVT2	Ugt8a	2.04688
Cpq	1.31208e-77	5.78515	0.563	0.276	4.39572e-73	PVT2	Cpq	2.03986
Chrna7	3.04266e-35	0.757922	0.321	0.158	1.01935e-30	PVT2	Chrna7	2.03165
Itga8	4.47053e-88	4.54726	0.626	0.316	1.49772e-83	PVT2	Itga8	1.98101
Nr2f1	6.39819e-69	3.62544	0.554	0.28	2.14352e-64	PVT2	Nr2f1	1.97857
A330015K06Rik	1.26077e-146	14.3055	0.827	0.423	4.22382e-142	PVT2	A330015K06Rik	1.95508
Adamts6	1.11098e-126	5.81116	0.772	0.397	3.72202e-122	PVT2	Adamts6	1.94458
Myo1e1	1.45945e-51	0.782148	0.46	0.237	4.88946e-47	PVT2	Myo1e	1.94093
Tns31	3.97373e-21	0.798884	0.244	0.129	1.33128e-16	PVT2	Tns3	1.89147
Shroom3	8.76661e-86	8.99275	0.682	0.364	2.93699e-81	PVT2	Shroom3	1.87363
Slco5a1	1.41834e-19	0.616438	0.239	0.128	4.75171e-15	PVT2	Slco5a1	1.86719
Gm12236	2.27045e-23	0.663381	0.278	0.149	7.60646e-19	PVT2	Gm12236	1.86577
Gm41609	1.3522e-32	5.88039	0.381	0.205	4.53014e-28	PVT2	Gm41609	1.85854
Cda1	1.48911e-32	0.649011	0.374	0.202	4.98881e-28	PVT2	Cda	1.85149
Prrg11	1.31129e-29	0.581459	0.344	0.186	4.39308e-25	PVT2	Prrg1	1.84946
Cacna1i	8.94958e-38	1.17136	0.443	0.244	2.99829e-33	PVT2	Cacna1i	1.81557
Adamts201	1.66474e-32	1.42285	0.388	0.216	5.57722e-28	PVT2	Adamts20	1.7963
A830082K12Rik	2.21098e-116	9.15543	0.844	0.477	7.40723e-112	PVT2	A830082K12Rik	1.76939
Sh3rf3	1.31563e-108	3.14249	0.799	0.46	4.40761e-104	PVT2	Sh3rf3	1.73696
Gpr1761	3.33175e-72	1.83362	0.693	0.403	1.1162e-67	PVT2	Gpr176	1.7196
Zfp57	5.35052e-23	0.597199	0.334	0.195	1.79253e-18	PVT2	Zfp57	1.71282
Ell2	4.93929e-35	4.00657	0.457	0.267	1.65476e-30	PVT2	Ell2	1.71161
4933411O13Rik	4.18996e-11	0.601379	0.174	0.102	1.40372e-06	PVT2	4933411O13Rik	1.70588
Ror1	3.86167e-168	16.4338	0.883	0.527	1.29374e-163	PVT2	Ror1	1.67552
Zfp53	2.41359e-28	1.58313	0.402	0.241	8.08601e-24	PVT2	Zfp53	1.66805
Pamr11	3.50878e-34	0.66056	0.514	0.31	1.17551e-29	PVT2	Pamr1	1.65806
Kcnk12	2.39478e-29	0.991619	0.426	0.258	8.02299e-25	PVT2	Kcnk12	1.65116
Zfp52	7.78406e-15	1.07494	0.264	0.161	2.60781e-10	PVT2	Zfp52	1.63975
Shroom41	2.05131e-12	0.58982	0.247	0.152	6.87231e-08	PVT2	Shroom4	1.625
Jph11	5.28202e-29	1.26735	0.476	0.294	1.76958e-24	PVT2	Jph1	1.61905
Mcub1	5.57963e-30	0.700219	0.47	0.291	1.86929e-25	PVT2	Mcub	1.61512
Gpc5	0	59.6887	0.967	0.599	0	PVT2	Gpc5	1.61436
Gm482811	9.75186e-12	0.575328	0.224	0.139	3.26707e-07	PVT2	Gm48281	1.61151
Gm326181	2.41231e-36	0.952371	0.548	0.345	8.08171e-32	PVT2	Gm32618	1.58841
Tom1l1	7.99827e-21	1.18552	0.381	0.24	2.67958e-16	PVT2	Tom1l1	1.5875
Polq1	4.98402e-13	0.812541	0.267	0.17	1.66975e-08	PVT2	Polq	1.57059
Ust1	2.04415e-31	3.18274	0.488	0.312	6.8483e-27	PVT2	Ust	1.5641
Gm41505	4.3922e-11	0.741288	0.241	0.156	1.47148e-06	PVT2	Gm41505	1.54487
Dnajc211	6.66775e-40	1.42183	0.6	0.392	2.23383e-35	PVT2	Dnajc21	1.53061
Tmeff1	2.77895e-14	1.66989	0.333	0.22	9.31004e-10	PVT2	Tmeff1	1.51364
Nrep	6.32399e-17	0.643726	0.373	0.247	2.11866e-12	PVT2	Nrep	1.51012
Ptchd1	1.8e-17	1.36458	0.404	0.27	6.03038e-13	PVT2	Ptchd1	1.4963
Ttc39b1	6.11515e-22	0.93543	0.456	0.305	2.0487e-17	PVT2	Ttc39b	1.49508
Cdh7	9.62198e-95	3.07771	0.865	0.58	3.22355e-90	PVT2	Cdh7	1.49138
Mcf21	6.21196e-22	2.09625	0.512	0.346	2.08113e-17	PVT2	Mcf2	1.47977
Tshz3	1.24395e-27	0.585364	0.542	0.371	4.1675e-23	PVT2	Tshz3	1.46092
Grm8	1.17584e-271	28.4047	0.981	0.672	3.93931e-267	PVT2	Grm8	1.45982
Ap1s31	6.20135e-13	0.938595	0.341	0.234	2.07758e-08	PVT2	Ap1s3	1.45726
Gab2	5.16728e-44	8.59784	0.733	0.503	1.73114e-39	PVT2	Gab2	1.45726
Ndst3	3.69076e-163	9.29936	0.936	0.644	1.23648e-158	PVT2	Ndst3	1.45342
Plxna21	5.55763e-108	1.24557	0.896	0.617	1.86192e-103	PVT2	Plxna2	1.45219
Cerk1	5.20202e-25	0.557031	0.559	0.387	1.74278e-20	PVT2	Cerk	1.44444
Pxdn	1.13833e-23	0.999165	0.541	0.377	3.81363e-19	PVT2	Pxdn	1.43501
4930480K15Rik	1.66479e-11	1.45536	0.312	0.218	5.57737e-07	PVT2	4930480K15Rik	1.43119
Csmd2os2	6.81842e-08	1.07585	0.249	0.174	0.00228431	PVT2	Csmd2os	1.43103
Zbtb9	1.52341e-08	0.962088	0.265	0.186	0.000510373	PVT2	Zbtb9	1.42473
Gm298651	6.52802e-18	1.53884	0.518	0.364	2.18702e-13	PVT2	Gm29865	1.42308
Gm163371	7.21631e-09	0.610008	0.28	0.197	0.000241761	PVT2	Gm16337	1.42132
Fam227b	1.41631e-09	6.08037	0.309	0.218	4.74492e-05	PVT2	Fam227b	1.41743
Dsel1	1.27095e-25	0.634271	0.573	0.406	4.25794e-21	PVT2	Dsel	1.41133
Igfbp5	1.71271e-37	3.10226	0.634	0.452	5.73792e-33	PVT2	Igfbp5	1.40265
Gm199381	1.19451e-17	0.977707	0.522	0.374	4.00184e-13	PVT2	Gm19938	1.39572
Gpld12	8.2069e-14	0.534595	0.44	0.316	2.74947e-09	PVT2	Gpld1	1.39241
Prdx41	3.59301e-09	0.545835	0.334	0.241	0.000120373	PVT2	Prdx4	1.38589
Myo1d1	8.5632e-17	2.64334	0.515	0.372	2.86884e-12	PVT2	Myo1d	1.38441
Ankrd44	5.28417e-46	6.08161	0.756	0.547	1.7703e-41	PVT2	Ankrd44	1.38208
Gca	2.06933e-08	0.561423	0.297	0.215	0.000693266	PVT2	Gca	1.3814
Extl3	1.25993e-49	17.4324	0.733	0.531	4.22103e-45	PVT2	Extl3	1.38041
Galns	2.06911e-10	0.538263	0.356	0.258	6.93195e-06	PVT2	Galns	1.37984
Gbe11	8.31945e-07	1.03778	0.237	0.172	0.0278718	PVT2	Gbe1	1.37791
Slc9b21	9.13631e-12	0.542854	0.417	0.303	3.06085e-07	PVT2	Slc9b2	1.37624
Smoc11	1.87349e-15	4.60892	0.497	0.362	6.27656e-11	PVT2	Smoc1	1.37293
Nrbp21	1.01425e-31	0.972539	0.753	0.557	3.39795e-27	PVT2	Nrbp2	1.35189
Fxyd61	6.27189e-09	0.669517	0.386	0.287	0.000210121	PVT2	Fxyd6	1.34495
Myo10	1.04361e-08	0.596795	0.368	0.274	0.00034963	PVT2	Myo10	1.34307
Sh3bp42	7.95145e-13	1.45869	0.452	0.337	2.66389e-08	PVT2	Sh3bp4	1.34125
Hivep11	8.23824e-20	0.765263	0.599	0.447	2.75997e-15	PVT2	Hivep1	1.34004
Adamts17	9.61668e-67	12.0187	0.889	0.665	3.22178e-62	PVT2	Adamts17	1.33684
Gm458471	2.62863e-12	0.683782	0.409	0.306	8.80645e-08	PVT2	Gm45847	1.3366
Sec24d	3.82526e-11	0.694815	0.447	0.337	1.28154e-06	PVT2	Sec24d	1.32641
Stx31	4.21424e-30	2.13926	0.701	0.529	1.41185e-25	PVT2	Stx3	1.32514
Flrt2	6.95769e-16	11.9272	0.578	0.437	2.33097e-11	PVT2	Flrt2	1.32265
Hacd21	8.83289e-19	3.38553	0.591	0.447	2.95919e-14	PVT2	Hacd2	1.32215
Ssbp3	6.03285e-45	1.41714	0.762	0.577	2.02113e-40	PVT2	Ssbp3	1.32062
Frmd31	5.45568e-26	3.15699	0.692	0.527	1.82776e-21	PVT2	Frmd3	1.31309
4930445B16Rik	1.81523e-07	4.84336	0.35	0.268	0.00608137	PVT2	4930445B16Rik	1.30597
Clgn	1.53441e-07	0.707362	0.359	0.276	0.00514059	PVT2	Clgn	1.30072
Stim21	2.2197e-19	1.84252	0.677	0.521	7.43645e-15	PVT2	Stim2	1.29942
Sptb1	1.24539e-28	0.532092	0.753	0.58	4.17231e-24	PVT2	Sptb	1.29828
Eif2ak31	1.01709e-08	0.608082	0.399	0.308	0.000340746	PVT2	Eif2ak3	1.29545
Cnnm11	1.21242e-27	1.59637	0.712	0.55	4.06185e-23	PVT2	Cnnm1	1.29455
Mindy31	2.47215e-20	0.766385	0.646	0.502	8.28221e-16	PVT2	Mindy3	1.28685
Larp1b	4.31188e-12	4.61833	0.518	0.404	1.44456e-07	PVT2	Larp1b	1.28218
6530409C15Rik1	1.51261e-13	1.1528	0.56	0.44	5.06754e-09	PVT2	6530409C15Rik	1.27273
Lpin2	7.77708e-15	2.31885	0.58	0.457	2.60548e-10	PVT2	Lpin2	1.26915
Pcdh101	3.93836e-44	3.06737	0.854	0.676	1.31943e-39	PVT2	Pcdh10	1.26331
Maoa	1.65487e-11	2.16039	0.514	0.407	5.54415e-07	PVT2	Maoa	1.2629
Kcnt2	8.24119e-81	11.6316	0.954	0.758	2.76097e-76	PVT2	Kcnt2	1.25858
Arhgap24	2.02774e-83	4.8024	0.938	0.746	6.79332e-79	PVT2	Arhgap24	1.25737
Pip5k1b1	1.27842e-32	2.22049	0.806	0.642	4.28297e-28	PVT2	Pip5k1b	1.25545
Gk	8.10208e-08	0.908124	0.415	0.331	0.00271436	PVT2	Gk	1.25378
Stx1a	6.06051e-13	2.24179	0.544	0.436	2.03039e-08	PVT2	Stx1a	1.24771
Gm472713	2.58812e-12	1.19333	0.576	0.465	8.67071e-08	PVT2	Gm47271	1.23871
Hdx2	1.26381e-15	0.891493	0.64	0.517	4.23402e-11	PVT2	Hdx	1.23791
Diras2	1.15832e-07	2.84221	0.456	0.369	0.00388059	PVT2	Diras2	1.23577
Adk	9.55625e-34	1.64781	0.832	0.675	3.20154e-29	PVT2	Adk	1.23259
Rap2a1	7.06457e-08	0.784105	0.452	0.367	0.00236677	PVT2	Rap2a	1.23161
Rab11fip41	3.79654e-15	0.781265	0.679	0.552	1.27192e-10	PVT2	Rab11fip4	1.23007
Pdgfa	2.99277e-08	0.801591	0.467	0.38	0.00100264	PVT2	Pdgfa	1.22895
Cfap691	6.75397e-08	0.525936	0.528	0.432	0.00226271	PVT2	Cfap69	1.22222
Cadm3	2.43516e-32	4.57336	0.834	0.683	8.15829e-28	PVT2	Cadm3	1.22108
Zdhhc211	5.13197e-11	0.752781	0.573	0.47	1.71931e-06	PVT2	Zdhhc21	1.21915
Cyth31	1.03198e-07	0.816957	0.511	0.42	0.00345732	PVT2	Cyth3	1.21667
Cdh101	1.85448e-18	2.77599	0.769	0.636	6.21287e-14	PVT2	Cdh10	1.20912
Cyth11	4.53205e-07	1.51663	0.554	0.459	0.0151833	PVT2	Cyth1	1.20697
Kcna41	7.91675e-07	1.45963	0.556	0.461	0.0265227	PVT2	Kcna4	1.20607
Flrt11	8.0948e-07	0.503337	0.514	0.427	0.0271192	PVT2	Flrt1	1.20375
Pag11	1.02826e-06	2.31963	0.6	0.501	0.0344489	PVT2	Pag1	1.1976
Ldlrad41	4.19854e-29	2.37589	0.91	0.76	1.4066e-24	PVT2	Ldlrad4	1.19737
Pcdh17	1.16027e-29	6.05641	0.844	0.706	3.88715e-25	PVT2	Pcdh17	1.19547
Scn9a	3.84644e-57	7.2865	0.923	0.775	1.28864e-52	PVT2	Scn9a	1.19097
Kcnj3	3.85221e-20	4.89034	0.853	0.721	1.29057e-15	PVT2	Kcnj3	1.18308
Kat6b1	3.02336e-41	3.07939	0.918	0.779	1.01289e-36	PVT2	Kat6b	1.17843
Far21	1.97639e-10	1.58652	0.715	0.61	6.62129e-06	PVT2	Far2	1.17213
Lyst1	4.13593e-09	1.36596	0.721	0.62	0.000138562	PVT2	Lyst	1.1629
Klhl24	5.52174e-07	0.867904	0.566	0.489	0.0184989	PVT2	Klhl24	1.15746
Hs2st11	1.24212e-11	2.3853	0.753	0.652	4.16136e-07	PVT2	Hs2st1	1.15491
Nyap21	5.96028e-22	3.18465	0.896	0.781	1.99681e-17	PVT2	Nyap2	1.14725
Agfg1	8.59651e-14	6.08207	0.833	0.727	2.88e-09	PVT2	Agfg1	1.1458
Pias21	6.34386e-09	0.783873	0.763	0.666	0.000212532	PVT2	Pias2	1.14565
Lysmd41	2.80212e-38	2.03273	0.911	0.797	9.38766e-34	PVT2	Lysmd4	1.14304
Atl1	5.16236e-08	4.13669	0.741	0.661	0.00172949	PVT2	Atl1	1.12103
Aplp21	2.1358e-53	1.92884	0.937	0.838	7.15536e-49	PVT2	Aplp2	1.11814
Kdm6a	2.91813e-08	2.79595	0.795	0.719	0.000977631	PVT2	Kdm6a	1.1057
Hectd41	3.90675e-12	0.987799	0.917	0.843	1.30884e-07	PVT2	Hectd4	1.08778
Phf141	2.78675e-12	3.08133	0.929	0.869	9.33617e-08	PVT2	Phf14	1.06904
Grip1	2.2146e-69	6.33111	0.983	0.923	7.41935e-65	PVT2	Grip1	1.06501
Epha5	4.88826e-70	5.30325	1	0.941	1.63767e-65	PVT2	Epha5	1.0627
Slc8a11	9.7958e-07	0.516035	0.957	0.903	0.0328179	PVT2	Slc8a1	1.0598
Pcsk21	1.88891e-86	0.564362	0.996	0.975	6.32823e-82	PVT2	Pcsk2	1.02154
Kitl	1.51558e-11	10.5175	0.783	0.8	5.07749e-07	PVT2	Kitl	0.97875
Prkg21	2.39999e-08	4.47451	0.231	0.318	0.000804044	PVT2	Prkg2	0.726415
Gypc	0	1.17448	0.252	0.008	0	PVT3	Gypc	31.5
Col6a1	5.90471e-285	1.30941	0.203	0.008	1.9782e-280	PVT3	Col6a1	25.375
Crhbp	3.3251e-143	11.3408	0.128	0.008	1.11397e-138	PVT3	Crhbp	16
Gm16701	3.27373e-176	8.7649	0.18	0.015	1.09676e-171	PVT3	Gm16701	12
Slc25a13	1.39769e-250	17.3084	0.29	0.031	4.68255e-246	PVT3	Slc25a13	9.35484
Mdfic	2.0028e-145	0.609995	0.18	0.02	6.70979e-141	PVT3	Mdfic	9
Maf	0	3.16103	0.487	0.055	0	PVT3	Maf	8.85455
Pear1	5.78776e-128	0.641909	0.162	0.019	1.93901e-123	PVT3	Pear1	8.52632
Tram2	2.00748e-111	0.560064	0.15	0.019	6.72545e-107	PVT3	Tram2	7.89474
9130024F11Rik	7.04655e-159	4.50891	0.218	0.028	2.36073e-154	PVT3	9130024F11Rik	7.78571
Insrr	2.23463e-288	4.28113	0.378	0.049	7.48647e-284	PVT3	Insrr	7.71429
Trhr	9.11044e-88	1.00987	0.123	0.016	3.05218e-83	PVT3	Trhr	7.6875
Tead4	5.67172e-165	1.67418	0.236	0.033	1.90014e-160	PVT3	Tead4	7.15152
Slc37a2	6.31124e-97	0.58001	0.143	0.02	2.11439e-92	PVT3	Slc37a2	7.15
Tspan11	4.51044e-98	0.594859	0.149	0.022	1.51109e-93	PVT3	Tspan11	6.77273
Drd1	3.8093e-132	0.51848	0.209	0.032	1.27619e-127	PVT3	Drd1	6.53125
Greb1	2.91858e-153	0.616648	0.241	0.037	9.77784e-149	PVT3	Greb1	6.51351
Ntrk1	1.62867e-150	1.26192	0.238	0.037	5.45638e-146	PVT3	Ntrk1	6.43243
Nts	1.14583e-103	1.4111	0.173	0.028	3.83875e-99	PVT3	Nts	6.17857
Gm44079	5.5632e-69	0.501681	0.117	0.019	1.86378e-64	PVT3	Gm44079	6.15789
Npffr1	1.264e-113	5.77318	0.193	0.032	4.23465e-109	PVT3	Npffr1	6.03125
Rerg	0	6.9899	0.733	0.125	0	PVT3	Rerg	5.864
Lamb1	0	3.10917	0.547	0.094	0	PVT3	Lamb1	5.81915
Cartpt	3.65959e-74	6.93974	0.132	0.023	1.22604e-69	PVT3	Cartpt	5.73913
Ribc2	2.15916e-97	0.785778	0.178	0.032	7.23363e-93	PVT3	Ribc2	5.5625
Sp9	4.48335e-130	0.992276	0.244	0.045	1.50201e-125	PVT3	Sp9	5.42222
Satb2	0	5.23969	0.56	0.104	0	PVT3	Satb2	5.38462
Htr1d	4.68798e-218	1.32245	0.392	0.073	1.57057e-213	PVT3	Htr1d	5.36986
Lyzl4	2.68019e-100	0.735761	0.199	0.038	8.97917e-96	PVT3	Lyzl4	5.23684
C79798	9.53587e-213	3.31127	0.4	0.078	3.19471e-208	PVT3	C79798	5.12821
Cacna1h	4.84186e-119	0.866854	0.244	0.049	1.62212e-114	PVT3	Cacna1h	4.97959
A230087F16Rik	3.43891e-102	0.518975	0.214	0.043	1.1521e-97	PVT3	A230087F16Rik	4.97674
Fhl2	6.43397e-71	0.813304	0.149	0.03	2.15551e-66	PVT3	Fhl2	4.96667
Stac2	2.37395e-125	0.995706	0.266	0.055	7.95319e-121	PVT3	Stac2	4.83636
Rai14	1.6733e-148	1.70922	0.303	0.063	5.60588e-144	PVT3	Rai14	4.80952
Ccdc187	1.62067e-172	1.62509	0.362	0.077	5.42958e-168	PVT3	Ccdc187	4.7013
Glis3	0	38.2816	0.945	0.203	0	PVT3	Glis3	4.65517
B4galnt2	7.13724e-58	20.091	0.13	0.028	2.39112e-53	PVT3	B4galnt2	4.64286
Bace2	9.01612e-162	1.28518	0.348	0.075	3.02058e-157	PVT3	Bace2	4.64
Gm49267	2.16204e-53	0.63153	0.125	0.027	7.24327e-49	PVT3	Gm49267	4.62963
Iqca	2.37709e-49	3.4806	0.111	0.024	7.96374e-45	PVT3	Iqca	4.625
Gm6999	1.44546e-46	2.17278	0.105	0.023	4.84257e-42	PVT3	Gm6999	4.56522
Map3k20	8.34916e-154	6.21388	0.338	0.075	2.79714e-149	PVT3	Map3k20	4.50667
Tcirg1	7.23647e-95	0.6637	0.223	0.051	2.42436e-90	PVT3	Tcirg1	4.37255
Kcnh4	4.0221e-73	0.540449	0.177	0.041	1.34749e-68	PVT3	Kcnh4	4.31707
Gab1	9.88361e-108	2.0201	0.259	0.06	3.31121e-103	PVT3	Gab1	4.31667
Gda	7.40691e-146	1.50137	0.344	0.08	2.48146e-141	PVT3	Gda	4.3
Abcc4	2.59787e-190	8.27185	0.421	0.098	8.7034e-186	PVT3	Abcc4	4.29592
Tspan9	5.92863e-298	5.98364	0.602	0.142	1.98621e-293	PVT3	Tspan9	4.23944
Anxa2	2.59645e-64	0.640982	0.164	0.039	8.69861e-60	PVT3	Anxa2	4.20513
Tnfaip8l3	5.49985e-50	0.753918	0.13	0.031	1.84256e-45	PVT3	Tnfaip8l3	4.19355
Cplx2	1.87787e-132	1.40649	0.322	0.077	6.29123e-128	PVT3	Cplx2	4.18182
C230014O12Rik	6.30878e-82	3.07808	0.212	0.052	2.11357e-77	PVT3	C230014O12Rik	4.07692
Pparg	3.33794e-165	3.94106	0.407	0.101	1.11828e-160	PVT3	Pparg	4.0297
Gpat3	1.65746e-73	0.679016	0.197	0.049	5.55284e-69	PVT3	Gpat3	4.02041
Cdr2	2.74452e-109	2.43834	0.299	0.079	9.19468e-105	PVT3	Cdr2	3.78481
Slc30a10	7.58705e-72	0.504722	0.211	0.057	2.54181e-67	PVT3	Slc30a10	3.70175
Il6ra	2.23274e-173	3.434	0.46	0.127	7.48012e-169	PVT3	Il6ra	3.62205
Bcl11b	0	4.46354	0.795	0.232	0	PVT3	Bcl11b	3.42672
Adra1a	7.53976e-48	1.46315	0.159	0.047	2.52597e-43	PVT3	Adra1a	3.38298
Lama3	8.66575e-291	3.32247	0.693	0.206	2.9032e-286	PVT3	Lama3	3.36408
Cadps2	0	32.1289	0.946	0.282	0	PVT3	Cadps2	3.35461
Adamts18	5.91607e-129	0.791438	0.404	0.121	1.982e-124	PVT3	Adamts18	3.33884
Gm47728	4.13751e-51	0.573806	0.181	0.055	1.38615e-46	PVT3	Gm47728	3.29091
Dnah2	1.1404e-95	7.08258	0.31	0.095	3.82058e-91	PVT3	Dnah2	3.26316
2810404M03Rik	9.7776e-65	2.1647	0.225	0.069	3.27569e-60	PVT3	2810404M03Rik	3.26087
Rflna	6.22281e-61	0.907591	0.217	0.067	2.08477e-56	PVT3	Rflna	3.23881
Mak	1.05932e-97	3.38907	0.33	0.103	3.54895e-93	PVT3	Mak	3.20388
Tctex1d1	9.61066e-45	1.07693	0.173	0.056	3.21976e-40	PVT3	Tctex1d1	3.08929
Gsg1l	1.18225e-139	1.62291	0.481	0.158	3.96079e-135	PVT3	Gsg1l	3.0443
Pbx3	0	4.19109	0.867	0.286	0	PVT3	Pbx3	3.03147
Cfap43	3.8826e-50	15.9557	0.2	0.066	1.30075e-45	PVT3	Cfap43	3.0303
Gm13481	2.56471e-80	9.59729	0.302	0.1	8.59229e-76	PVT3	Gm13481	3.02
Gm26771	7.9817e-79	0.94909	0.304	0.101	2.67403e-74	PVT3	Gm26771	3.0099
Slc29a4	5.08386e-51	0.665805	0.207	0.069	1.70319e-46	PVT3	Slc29a4	3
Gldn	8.52258e-58	0.992352	0.232	0.078	2.85523e-53	PVT3	Gldn	2.97436
Kcna1	1.85932e-104	1.66975	0.383	0.129	6.22908e-100	PVT3	Kcna1	2.96899
Nmbr	3.88969e-99	1.49079	0.373	0.126	1.30312e-94	PVT3	Nmbr	2.96032
Gm9947	4.63452e-45	0.555027	0.189	0.064	1.55266e-40	PVT3	Gm9947	2.95312
Mpped1	2.97082e-83	5.23228	0.324	0.11	9.95283e-79	PVT3	Mpped1	2.94545
Dctd	2.39753e-121	2.09772	0.439	0.15	8.03222e-117	PVT3	Dctd	2.92667
Gm13112	3.5891e-47	0.574624	0.203	0.07	1.20242e-42	PVT3	Gm13112	2.9
Adam12	5.21564e-82	10.725	0.326	0.113	1.74735e-77	PVT3	Adam12	2.88496
Gsto1	2.11001e-56	7.0903	0.236	0.082	7.06897e-52	PVT3	Gsto1	2.87805
Sox13	4.34137e-44	0.813474	0.192	0.067	1.45445e-39	PVT3	Sox13	2.86567
Pxn	2.33676e-41	0.524572	0.182	0.064	7.82862e-37	PVT3	Pxn	2.84375
Kcnj5	1.498e-144	2.37521	0.516	0.182	5.01859e-140	PVT3	Kcnj5	2.83516
L3mbtl4	3.09164e-39	1.1117	0.186	0.067	1.03576e-34	PVT3	L3mbtl4	2.77612
Fam78b	2.70164e-205	11.5778	0.646	0.234	9.05103e-201	PVT3	Fam78b	2.76068
Frem3	3.73262e-37	4.64514	0.177	0.065	1.2505e-32	PVT3	Frem3	2.72308
Ankrd54	1.35876e-41	0.570782	0.201	0.075	4.55212e-37	PVT3	Ankrd54	2.68
Thbs3	7.44411e-56	1.10324	0.266	0.1	2.49392e-51	PVT3	Thbs3	2.66
Rgs22	1.72928e-28	1.08382	0.143	0.054	5.79345e-24	PVT3	Rgs22	2.64815
Baiap2	7.3284e-47	0.50736	0.233	0.088	2.45516e-42	PVT3	Baiap2	2.64773
Megf6	1.0412e-61	0.674712	0.296	0.112	3.48823e-57	PVT3	Megf6	2.64286
Pcsk6	2.27681e-143	10.9079	0.553	0.21	7.62779e-139	PVT3	Pcsk6	2.63333
Fbxl7	6.65634e-113	10.4001	0.475	0.182	2.23001e-108	PVT3	Fbxl7	2.60989
Gm19744	1.98761e-48	1.23333	0.246	0.095	6.65891e-44	PVT3	Gm19744	2.58947
2023-09-09	5.52812e-78	1.05543	0.365	0.141	1.85203e-73	PVT3	2023-09-09	2.58865
Tor3a	1.07468e-34	0.543309	0.183	0.071	3.6004e-30	PVT3	Tor3a	2.57746
Tnfsf13b	3.84013e-69	0.956552	0.332	0.129	1.28652e-64	PVT3	Tnfsf13b	2.57364
Gm26608	5.20981e-19	0.609391	0.102	0.04	1.74539e-14	PVT3	Gm26608	2.55
Gck	2.09147e-156	2.91383	0.617	0.242	7.00684e-152	PVT3	Gck	2.54959
Mylip	5.16603e-63	0.709956	0.311	0.122	1.73072e-58	PVT3	Mylip	2.54918
Csgalnact1	3.05308e-235	3.70547	0.754	0.297	1.02284e-230	PVT3	Csgalnact1	2.53872
Slc2a12	8.37768e-36	0.576514	0.197	0.078	2.80669e-31	PVT3	Slc2a12	2.52564
Spata13	1.74004e-48	0.617008	0.259	0.103	5.82947e-44	PVT3	Spata13	2.51456
Ak8	4.04389e-56	0.671766	0.294	0.117	1.35478e-51	PVT3	Ak8	2.51282
Steap2	2.16581e-62	1.48383	0.316	0.126	7.25591e-58	PVT3	Steap2	2.50794
Gm35823	1.1382e-39	0.961491	0.219	0.088	3.8132e-35	PVT3	Gm35823	2.48864
Agbl1	2.37274e-38	4.97159	0.209	0.084	7.94915e-34	PVT3	Agbl1	2.4881
9130015G15Rik	1.36368e-40	0.847213	0.228	0.092	4.56861e-36	PVT3	9130015G15Rik	2.47826
Gm49878	1.05337e-38	1.17338	0.217	0.088	3.52899e-34	PVT3	Gm49878	2.46591
4933408N05Rik	1.36314e-17	0.503288	0.101	0.041	4.56679e-13	PVT3	4933408N05Rik	2.46341
Coq8b	1.58364e-72	1.01631	0.37	0.151	5.3055e-68	PVT3	Coq8b	2.45033
Dnah1	2.82769e-61	1.25265	0.335	0.138	9.47334e-57	PVT3	Dnah1	2.42754
Gm15563	1.30609e-66	1.1211	0.359	0.149	4.37566e-62	PVT3	Gm15563	2.4094
Lpar1	7.08164e-64	3.56464	0.366	0.154	2.37249e-59	PVT3	Lpar1	2.37662
Rasa41	6.14953e-60	0.872746	0.356	0.153	2.06022e-55	PVT3	Rasa4	2.3268
Adam34	2.9691e-20	0.55412	0.132	0.057	9.94707e-16	PVT3	Adam34	2.31579
Gm15398	1.09798e-287	27.72	0.873	0.378	3.67844e-283	PVT3	Gm15398	2.30952
Fam83b	1.7884e-22	1.13695	0.15	0.065	5.99149e-18	PVT3	Fam83b	2.30769
Vegfc	8.39395e-46	0.838616	0.293	0.127	2.81214e-41	PVT3	Vegfc	2.30709
AC154606.1	7.75482e-19	0.61221	0.126	0.055	2.59802e-14	PVT3	AC154606.1	2.29091
Syt10	8.12091e-220	4.7751	0.812	0.359	2.72067e-215	PVT3	Syt10	2.26184
Dchs2	3.81278e-97	4.18204	0.524	0.233	1.27736e-92	PVT3	Dchs2	2.24893
Sema3a	8.47125e-52	4.515	0.339	0.151	2.83804e-47	PVT3	Sema3a	2.24503
Notch2	4.24508e-73	19.4262	0.431	0.192	1.42219e-68	PVT3	Notch2	2.24479
Traip	6.318e-183	6.53405	0.709	0.316	2.11666e-178	PVT3	Traip	2.24367
Gm48893	5.49281e-150	5.97271	0.667	0.298	1.8402e-145	PVT3	Gm48893	2.23826
Prokr2	2.95496e-69	1.40224	0.414	0.185	9.89972e-65	PVT3	Prokr2	2.23784
Fgd3	2.7966e-61	1.35482	0.389	0.174	9.36916e-57	PVT3	Fgd3	2.23563
D630024D03Rik	1.02189e-35	1.73375	0.247	0.112	3.42352e-31	PVT3	D630024D03Rik	2.20536
Prox1os	2.18417e-113	11.3704	0.592	0.27	7.3174e-109	PVT3	Prox1os	2.19259
Dynlt1a	5.60159e-46	0.669988	0.314	0.144	1.87664e-41	PVT3	Dynlt1a	2.18056
Itpr2	1.34349e-23	0.897654	0.172	0.079	4.50095e-19	PVT3	Itpr2	2.17722
Mob3b	4.94743e-63	3.35274	0.407	0.187	1.65749e-58	PVT3	Mob3b	2.17647
Map3k14	8.64294e-67	0.965514	0.428	0.197	2.89556e-62	PVT3	Map3k14	2.17259
Plekhg5	2.18916e-80	9.39701	0.463	0.214	7.33412e-76	PVT3	Plekhg5	2.16355
Myh9	1.71748e-124	7.3429	0.602	0.28	5.7539e-120	PVT3	Myh9	2.15
Tmem2	8.20713e-19	0.641736	0.144	0.067	2.74955e-14	PVT3	Tmem2	2.14925
Tmem132cos	3.42913e-117	1.34936	0.62	0.289	1.14883e-112	PVT3	Tmem132cos	2.14533
A330033J07Rik	8.21704e-27	2.80184	0.21	0.098	2.75287e-22	PVT3	A330033J07Rik	2.14286
9330179D12Rik	8.38599e-24	0.568812	0.184	0.086	2.80947e-19	PVT3	9330179D12Rik	2.13953
Cfap44	2.02568e-43	2.03613	0.324	0.152	6.78644e-39	PVT3	Cfap44	2.13158
Rspo1	1.3444e-43	0.681074	0.324	0.153	4.50399e-39	PVT3	Rspo1	2.11765
Gm32036	1.06752e-122	8.37382	0.687	0.326	3.5764e-118	PVT3	Gm32036	2.10736
Gm13832	1.20265e-14	0.712194	0.122	0.058	4.02912e-10	PVT3	Gm13832	2.10345
Sox2	1.16897e-28	0.503459	0.225	0.107	3.91627e-24	PVT3	Sox2	2.1028
Lypd1	1.97057e-74	3.02759	0.471	0.224	6.6018e-70	PVT3	Lypd1	2.10268
Rnf182	5.29693e-106	1.594	0.606	0.289	1.77458e-101	PVT3	Rnf182	2.09689
Drd3	8.39466e-50	2.62146	0.383	0.183	2.81238e-45	PVT3	Drd3	2.0929
Slc16a6	2.02889e-76	1.41821	0.483	0.231	6.79719e-72	PVT3	Slc16a6	2.09091
AW551984	1.45865e-29	1.15344	0.236	0.113	4.88677e-25	PVT3	AW551984	2.0885
Gm12002	2.35264e-79	9.86464	0.495	0.238	7.88182e-75	PVT3	Gm12002	2.07983
Gm15520	2.16133e-87	4.89269	0.528	0.254	7.24088e-83	PVT3	Gm15520	2.07874
Ncmap	7.45102e-27	0.68811	0.22	0.106	2.49624e-22	PVT3	Ncmap	2.07547
1700016K05Rik	1.45685e-44	0.950802	0.338	0.163	4.88074e-40	PVT3	1700016K05Rik	2.07362
Gm1604b	2.91314e-25	0.69133	0.208	0.101	9.7596e-21	PVT3	Gm1604b	2.05941
Gm16036	1.03716e-25	0.925322	0.212	0.103	3.4747e-21	PVT3	Gm16036	2.05825
Medag	1.59612e-58	1.66472	0.412	0.201	5.34732e-54	PVT3	Medag	2.04975
Nmur2	2.97928e-24	0.570584	0.209	0.102	9.98118e-20	PVT3	Nmur2	2.04902
Fgd5	1.90636e-12	0.587883	0.111	0.055	6.38668e-08	PVT3	Fgd5	2.01818
Zdhhc23	1.28052e-51	1.16241	0.406	0.202	4.29001e-47	PVT3	Zdhhc23	2.0099
Gm49876	7.73279e-27	1.23796	0.239	0.119	2.59064e-22	PVT3	Gm49876	2.0084
Adamts3	1.01057e-26	0.721132	0.243	0.121	3.38561e-22	PVT3	Adamts3	2.00826
Gm2516	2.01686e-113	9.83649	0.69	0.346	6.75689e-109	PVT3	Gm2516	1.99422
Rnf144a	2.01174e-30	0.899547	0.259	0.13	6.73974e-26	PVT3	Rnf144a	1.99231
Spata1	6.12759e-25	4.12816	0.221	0.111	2.05286e-20	PVT3	Spata1	1.99099
Elovl5	2.71182e-108	1.87328	0.637	0.32	9.08514e-104	PVT3	Elovl5	1.99063
Gm19410	2.97748e-17	0.550106	0.165	0.083	9.97515e-13	PVT3	Gm19410	1.98795
Fam126a	9.63549e-46	2.77243	0.366	0.185	3.22808e-41	PVT3	Fam126a	1.97838
Cpne2	1.41889e-97	2.02669	0.603	0.305	4.75356e-93	PVT3	Cpne2	1.97705
B3galt5	2.73127e-47	0.947432	0.386	0.196	9.1503e-43	PVT3	B3galt5	1.96939
Crot	1.54037e-59	1.73796	0.449	0.228	5.16056e-55	PVT3	Crot	1.9693
Cfap300	1.49512e-40	2.14397	0.34	0.173	5.00896e-36	PVT3	Cfap300	1.96532
Hhipl1	3.17965e-28	0.582119	0.257	0.131	1.06525e-23	PVT3	Hhipl1	1.96183
Pfkfb4	1.06925e-77	6.30886	0.543	0.278	3.5822e-73	PVT3	Pfkfb4	1.95324
Gm45321	2.93436e-121	26.2647	0.734	0.377	9.83071e-117	PVT3	Gm45321	1.94695
Ikbip	6.12503e-28	0.602706	0.27	0.14	2.05201e-23	PVT3	Ikbip	1.92857
Gm12930	2.49297e-34	0.788821	0.32	0.166	8.35194e-30	PVT3	Gm12930	1.92771
Wscd1	1.32006e-87	3.05045	0.568	0.296	4.42246e-83	PVT3	Wscd1	1.91892
Rras2	1.12709e-94	11.4372	0.609	0.318	3.77599e-90	PVT3	Rras2	1.91509
4930555F03Rik	2.30825e-160	7.71613	0.844	0.442	7.7331e-156	PVT3	4930555F03Rik	1.9095
Vwa5b1	3.01707e-115	3.35618	0.704	0.369	1.01078e-110	PVT3	Vwa5b1	1.90786
Sult2b1	3.46229e-17	0.566404	0.181	0.095	1.15994e-12	PVT3	Sult2b1	1.90526
Micall1	6.83159e-43	1.08571	0.394	0.208	2.28872e-38	PVT3	Micall1	1.89423
Zim1	3.08654e-16	0.50008	0.175	0.093	1.03405e-11	PVT3	Zim1	1.88172
Gm42851	7.36357e-25	0.589879	0.258	0.138	2.46694e-20	PVT3	Gm42851	1.86957
Traf3	2.50723e-44	9.21702	0.437	0.234	8.39971e-40	PVT3	Traf3	1.86752
Creb3l2	6.15215e-18	2.13276	0.194	0.104	2.06109e-13	PVT3	Creb3l2	1.86538
Mvk	1.17473e-21	0.712958	0.233	0.125	3.93559e-17	PVT3	Mvk	1.864
Rasal1	5.33249e-61	0.602481	0.507	0.272	1.78649e-56	PVT3	Rasal1	1.86397
Nrg4	9.50066e-22	0.672757	0.239	0.129	3.18291e-17	PVT3	Nrg4	1.85271
Vgll4	1.05349e-75	10.7666	0.569	0.308	3.52939e-71	PVT3	Vgll4	1.8474
Gm11417	3.29375e-71	5.74285	0.579	0.314	1.10347e-66	PVT3	Gm11417	1.84395
Ppfibp1	9.8587e-119	5.24794	0.74	0.404	3.30286e-114	PVT3	Ppfibp1	1.83168
St8sia51	8.44386e-24	0.644056	0.272	0.149	2.82886e-19	PVT3	St8sia5	1.8255
Tmem181a	5.74224e-104	2.09447	0.668	0.366	1.92377e-99	PVT3	Tmem181a	1.82514
Fhad1	8.72241e-28	0.716195	0.296	0.163	2.92218e-23	PVT3	Fhad1	1.81595
Ptpro	8.9271e-141	8.18441	0.775	0.427	2.99076e-136	PVT3	Ptpro	1.81499
Gm10848	3.21656e-51	2.17648	0.484	0.267	1.07761e-46	PVT3	Gm10848	1.81273
Upb1	7.94815e-11	0.88234	0.13	0.072	2.66279e-06	PVT3	Upb1	1.80556
Pard6g	3.46787e-22	0.53081	0.26	0.144	1.16181e-17	PVT3	Pard6g	1.80556
Hck	1.02101e-14	0.543864	0.175	0.097	3.4206e-10	PVT3	Hck	1.80412
Coro61	1.5413e-36	1.09636	0.375	0.209	5.16365e-32	PVT3	Coro6	1.79426
Tgfb21	1.16375e-39	2.73628	0.414	0.232	3.89879e-35	PVT3	Tgfb2	1.78448
Antxr1	5.20147e-18	0.55068	0.226	0.127	1.7426e-13	PVT3	Antxr1	1.77953
Soat1	6.70382e-29	1.87288	0.318	0.179	2.24592e-24	PVT3	Soat1	1.77654
Ltbp1	5.73858e-24	11.2221	0.29	0.164	1.92254e-19	PVT3	Ltbp1	1.76829
Vat1l	4.41824e-106	8.44903	0.742	0.425	1.4802e-101	PVT3	Vat1l	1.74588
Tbc1d161	1.94142e-62	2.75481	0.552	0.318	6.50413e-58	PVT3	Tbc1d16	1.73585
Ampd3	4.50823e-45	1.59534	0.454	0.262	1.51035e-40	PVT3	Ampd3	1.73282
Gm21954	1.94882e-23	0.630454	0.291	0.168	6.52893e-19	PVT3	Gm21954	1.73214
Gm33696	1.61777e-22	2.30097	0.273	0.158	5.41985e-18	PVT3	Gm33696	1.72785
Parvb	4.41188e-42	1.41855	0.44	0.255	1.47807e-37	PVT3	Parvb	1.72549
Diaph3	1.28951e-15	1.69993	0.215	0.125	4.32011e-11	PVT3	Diaph3	1.72
Gnb4	1.1217e-45	4.80765	0.516	0.3	3.75792e-41	PVT3	Gnb4	1.72
Gm973	5.78557e-12	0.630329	0.168	0.098	1.93828e-07	PVT3	Gm973	1.71429
Wwc2	6.6832e-43	3.19606	0.468	0.273	2.239e-38	PVT3	Wwc2	1.71429
Smyd2	2.48731e-73	2.28087	0.634	0.371	8.333e-69	PVT3	Smyd2	1.70889
Cemip2	2.10372e-28	0.634634	0.338	0.198	7.04788e-24	PVT3	Cemip2	1.70707
Cwf19l1	1.01367e-16	0.759446	0.227	0.133	3.39599e-12	PVT3	Cwf19l1	1.70677
Tmem132c1	8.64913e-149	3.66359	0.863	0.506	2.89763e-144	PVT3	Tmem132c	1.70553
Zfp536	3.64661e-207	0.700666	0.926	0.543	1.22169e-202	PVT3	Zfp536	1.70534
Slc37a1	1.86714e-36	0.758786	0.426	0.25	6.2553e-32	PVT3	Slc37a1	1.704
Cacng8	6.80238e-69	1.4801	0.608	0.357	2.27893e-64	PVT3	Cacng8	1.70308
Snx11	3.69341e-22	0.796164	0.297	0.175	1.23737e-17	PVT3	Snx11	1.69714
Shisa4	4.65745e-56	2.69871	0.517	0.305	1.56034e-51	PVT3	Shisa4	1.69508
Gm13052	7.80623e-68	2.94456	0.605	0.357	2.61524e-63	PVT3	Gm13052	1.69468
Nek11	1.73341e-12	1.6162	0.183	0.108	5.80726e-08	PVT3	Nek11	1.69444
Agfg2	1.57341e-47	2.83438	0.503	0.298	5.27125e-43	PVT3	Agfg2	1.68792
P4ha2	4.04573e-37	0.765406	0.44	0.262	1.3554e-32	PVT3	P4ha2	1.67939
Gm42477	3.32448e-32	0.982869	0.408	0.243	1.11377e-27	PVT3	Gm42477	1.67901
Tmem266	4.40451e-29	5.51946	0.384	0.229	1.4756e-24	PVT3	Tmem266	1.67686
Mrps6	6.50753e-16	0.539911	0.223	0.133	2.18015e-11	PVT3	Mrps6	1.67669
Gm9856	1.96533e-42	1.95715	0.461	0.275	6.58423e-38	PVT3	Gm9856	1.67636
Trmt10a	2.67023e-20	0.56196	0.291	0.174	8.9458e-16	PVT3	Trmt10a	1.67241
Ankrd29	7.70661e-30	0.889545	0.388	0.232	2.58187e-25	PVT3	Ankrd29	1.67241
Dleu21	1.20914e-28	0.55714	0.36	0.216	4.05085e-24	PVT3	Dleu2	1.66667
Mettl9	5.03031e-27	0.91525	0.348	0.209	1.68526e-22	PVT3	Mettl9	1.66507
Pnpla3	5.74519e-18	0.684274	0.263	0.158	1.92475e-13	PVT3	Pnpla3	1.66456
Kif9	9.91838e-19	0.638925	0.276	0.166	3.32286e-14	PVT3	Kif9	1.66265
Efnb3	3.4448e-25	0.674289	0.353	0.213	1.15408e-20	PVT3	Efnb3	1.65728
E430024P14Rik	9.66081e-27	1.70337	0.353	0.213	3.23657e-22	PVT3	E430024P14Rik	1.65728
Cyp7b1	7.67597e-52	0.506316	0.559	0.338	2.5716e-47	PVT3	Cyp7b1	1.65385
Gm44151	3.63648e-121	4.04815	0.807	0.488	1.21829e-116	PVT3	Gm44151	1.65369
Gm26827	1.71063e-39	2.92845	0.486	0.294	5.73094e-35	PVT3	Gm26827	1.65306
Baiap3	5.6994e-37	0.601752	0.521	0.316	1.90941e-32	PVT3	Baiap3	1.64873
Gm153361	8.64994e-35	2.78979	0.456	0.277	2.8979e-30	PVT3	Gm15336	1.64621
Arhgap18	2.19758e-148	5.00806	0.816	0.496	7.36232e-144	PVT3	Arhgap18	1.64516
Nudt13	9.6913e-25	1.031	0.347	0.211	3.24678e-20	PVT3	Nudt13	1.64455
Slc22a4	3.83338e-22	0.857204	0.332	0.202	1.28426e-17	PVT3	Slc22a4	1.64356
Gm206581	1.91077e-20	0.565427	0.322	0.196	6.40147e-16	PVT3	Gm20658	1.64286
Map2k3	3.28973e-17	0.598233	0.261	0.159	1.10212e-12	PVT3	Map2k3	1.64151
Pygo1	3.10621e-16	0.577987	0.256	0.156	1.04064e-11	PVT3	Pygo1	1.64103
Lpp	1.14239e-126	7.31412	0.78	0.476	3.82722e-122	PVT3	Lpp	1.63866
Pnrc1	3.68298e-36	1.3967	0.455	0.278	1.23387e-31	PVT3	Pnrc1	1.63669
Cfap61	4.02963e-25	2.36449	0.36	0.22	1.35001e-20	PVT3	Cfap61	1.63636
Chsy1	3.4262e-27	0.845986	0.368	0.225	1.14785e-22	PVT3	Chsy1	1.63556
Mvb12b	6.04843e-212	8.94416	0.881	0.539	2.02635e-207	PVT3	Mvb12b	1.63451
Kazn	2.70873e-58	2.25175	0.573	0.351	9.07478e-54	PVT3	Kazn	1.63248
Nckap5	1.58933e-136	11.7951	0.839	0.516	5.32459e-132	PVT3	Nckap5	1.62597
Gm12239	2.93049e-59	0.91528	0.654	0.403	9.81772e-55	PVT3	Gm12239	1.62283
4930444P10Rik	4.33461e-15	0.537192	0.252	0.156	1.45218e-10	PVT3	4930444P10Rik	1.61538
Fam234a	2.01403e-19	0.64668	0.315	0.195	6.74739e-15	PVT3	Fam234a	1.61538
Ifitm10	2.47661e-13	0.542394	0.22	0.137	8.29712e-09	PVT3	Ifitm10	1.60584
Otud3	3.15092e-17	0.680819	0.284	0.177	1.05562e-12	PVT3	Otud3	1.60452
Acat2	3.96883e-23	0.660107	0.356	0.222	1.32964e-18	PVT3	Acat2	1.6036
Rcbtb1	5.44701e-30	0.95792	0.426	0.266	1.82486e-25	PVT3	Rcbtb1	1.6015
Ttc7	9.33245e-15	0.732409	0.245	0.153	3.12656e-10	PVT3	Ttc7	1.60131
Hrh1	2.09669e-38	1.40869	0.498	0.311	7.02432e-34	PVT3	Hrh1	1.60129
Satb1	2.31256e-24	4.44322	0.381	0.238	7.74753e-20	PVT3	Satb1	1.60084
Ccdc191	1.51626e-30	1.32024	0.435	0.272	5.07976e-26	PVT3	Ccdc191	1.59926
Sp3os	9.71591e-15	0.692025	0.246	0.154	3.25502e-10	PVT3	Sp3os	1.5974
L3mbtl3	1.55257e-75	6.3159	0.682	0.427	5.20141e-71	PVT3	L3mbtl3	1.59719
Gm15283	3.45488e-57	7.55621	0.63	0.395	1.15746e-52	PVT3	Gm15283	1.59494
Rtn4r	4.09425e-26	0.75053	0.387	0.243	1.37166e-21	PVT3	Rtn4r	1.59259
2900060N12Rik	3.39323e-13	1.37687	0.229	0.144	1.1368e-08	PVT3	2900060N12Rik	1.59028
Gm37982	2.40094e-22	0.802342	0.359	0.226	8.04363e-18	PVT3	Gm37982	1.5885
Amz1	7.30339e-17	1.81211	0.279	0.176	2.44678e-12	PVT3	Amz1	1.58523
Ankrd13a	1.14638e-40	2.40659	0.525	0.332	3.84062e-36	PVT3	Ankrd13a	1.58133
4933413L06Rik1	9.61021e-22	1.36653	0.373	0.236	3.21961e-17	PVT3	4933413L06Rik	1.58051
Spata6	9.81058e-18	1.37797	0.3	0.19	3.28674e-13	PVT3	Spata6	1.57895
Usp3	7.68026e-42	4.09842	0.524	0.332	2.57304e-37	PVT3	Usp3	1.57831
Dse	4.05496e-26	0.740536	0.407	0.258	1.35849e-21	PVT3	Dse	1.57752
Lynx11	1.13229e-28	0.659084	0.439	0.279	3.7934e-24	PVT3	Lynx1	1.57348
Arhgap421	1.59413e-34	1.30551	0.495	0.315	5.34066e-30	PVT3	Arhgap42	1.57143
Ankrd55	4.7991e-72	7.24307	0.676	0.431	1.60779e-67	PVT3	Ankrd55	1.56845
Serinc5	1.39561e-17	0.638744	0.305	0.195	4.67556e-13	PVT3	Serinc5	1.5641
Pnma3	1.07424e-25	0.981317	0.419	0.268	3.59891e-21	PVT3	Pnma3	1.56343
Sh2d5	1.16671e-16	0.821077	0.286	0.183	3.90873e-12	PVT3	Sh2d5	1.56284
Arntl2	3.38662e-25	1.06029	0.4	0.257	1.13459e-20	PVT3	Arntl2	1.55642
Aldh4a1	4.38458e-13	0.720424	0.238	0.153	1.46892e-08	PVT3	Aldh4a1	1.55556
Pzp	2.67613e-15	1.04254	0.286	0.185	8.96556e-11	PVT3	Pzp	1.54595
Creg2	3.29041e-13	0.782069	0.255	0.165	1.10235e-08	PVT3	Creg2	1.54545
Adra1b1	5.06953e-42	2.78418	0.593	0.384	1.69839e-37	PVT3	Adra1b	1.54427
Gm39244	7.13726e-13	0.529747	0.253	0.164	2.39112e-08	PVT3	Gm39244	1.54268
Trmt9b	2.21673e-09	0.581041	0.18	0.117	7.42648e-05	PVT3	Trmt9b	1.53846
Tpgs2	5.46252e-16	0.696516	0.304	0.198	1.83005e-11	PVT3	Tpgs2	1.53535
Ppil6	1.29832e-30	2.84746	0.501	0.327	4.34963e-26	PVT3	Ppil6	1.53211
Nectin3	1.8159e-32	5.77314	0.478	0.312	6.08364e-28	PVT3	Nectin3	1.53205
Ptprt	3.06172e-297	59.4599	0.981	0.641	1.02574e-292	PVT3	Ptprt	1.53042
2900005J15Rik	5.75582e-08	0.58341	0.156	0.102	0.00192831	PVT3	2900005J15Rik	1.52941
D830036C21Rik	2.56603e-11	1.13125	0.227	0.149	8.59673e-07	PVT3	D830036C21Rik	1.52349
Nsdhl	9.83773e-29	1.19515	0.466	0.307	3.29584e-24	PVT3	Nsdhl	1.51792
Cyb561	3.80441e-19	0.878318	0.361	0.238	1.27455e-14	PVT3	Cyb561	1.51681
Kcnh8	2.62061e-32	13.6236	0.596	0.393	8.77957e-28	PVT3	Kcnh8	1.51654
Etnk2	6.47728e-12	0.619716	0.253	0.167	2.17002e-07	PVT3	Etnk2	1.51497
Gm41361	1.84194e-16	4.18739	0.307	0.203	6.17087e-12	PVT3	Gm41361	1.51232
Csmd2os	2.96567e-12	0.968129	0.26	0.172	9.93558e-08	PVT3	Csmd2os	1.51163
Aldh9a1	5.25788e-12	0.544351	0.246	0.163	1.7615e-07	PVT3	Aldh9a1	1.5092
Hip1	5.56452e-28	0.791965	0.454	0.301	1.86423e-23	PVT3	Hip1	1.50831
Limch1	4.73912e-98	1.88744	0.797	0.529	1.5877e-93	PVT3	Limch1	1.50662
Prag1	8.06656e-37	2.39569	0.571	0.379	2.70246e-32	PVT3	Prag1	1.5066
Slc7a11	1.4639e-06	3.84852	0.14	0.093	0.0490436	PVT3	Slc7a11	1.50538
Rab40b	7.84603e-75	4.86183	0.71	0.472	2.62858e-70	PVT3	Rab40b	1.50424
Ccdc15	3.13166e-12	0.545065	0.26	0.173	1.04917e-07	PVT3	Ccdc15	1.50289
Prkab2	2.33102e-20	1.04749	0.386	0.257	7.80937e-16	PVT3	Prkab2	1.50195
Wipf3	2.70667e-27	0.869432	0.474	0.316	9.0679e-23	PVT3	Wipf3	1.5
Glra2	5.89837e-33	1.49562	0.547	0.365	1.97607e-28	PVT3	Glra2	1.49863
Eef2k	7.76101e-35	1.75996	0.528	0.353	2.60009e-30	PVT3	Eef2k	1.49575
Rcan3	1.60851e-27	0.916001	0.483	0.323	5.38884e-23	PVT3	Rcan3	1.49536
Rec114	5.17133e-14	0.899814	0.284	0.19	1.7325e-09	PVT3	Rec114	1.49474
Rnpep	5.33346e-30	1.70288	0.491	0.329	1.78682e-25	PVT3	Rnpep	1.4924
Gm42609	2.2535e-20	1.84143	0.37	0.248	7.54968e-16	PVT3	Gm42609	1.49194
C1galt1	4.9149e-12	0.628644	0.261	0.175	1.64659e-07	PVT3	C1galt1	1.49143
Pik3c2b	6.12336e-17	1.33609	0.343	0.23	2.05145e-12	PVT3	Pik3c2b	1.4913
Prkra	1.07046e-09	0.787399	0.225	0.151	3.58624e-05	PVT3	Prkra	1.49007
Lca5l	1.96464e-22	5.96689	0.428	0.288	6.58195e-18	PVT3	Lca5l	1.48611
Lmf1	2.64711e-18	1.08711	0.361	0.243	8.86834e-14	PVT3	Lmf1	1.4856
Speg	1.02395e-28	5.76771	0.49	0.33	3.43044e-24	PVT3	Speg	1.48485
Gm161261	1.38115e-26	0.668889	0.476	0.321	4.62714e-22	PVT3	Gm16126	1.48287
Numbl	6.19125e-14	0.68391	0.301	0.203	2.07419e-09	PVT3	Numbl	1.48276
Asb18	9.04069e-12	1.22222	0.255	0.172	3.02881e-07	PVT3	Asb18	1.48256
Gprc5b	4.4935e-11	0.532577	0.246	0.166	1.50541e-06	PVT3	Gprc5b	1.48193
Pgap2	1.08042e-17	0.657687	0.365	0.247	3.61963e-13	PVT3	Pgap2	1.47773
Flt31	1.92572e-32	1.31216	0.537	0.364	6.45156e-28	PVT3	Flt3	1.47527
Cacng3	6.74383e-213	24.6535	0.936	0.635	2.25932e-208	PVT3	Cacng3	1.47402
Mpp5	1.10161e-21	1.41544	0.424	0.288	3.69062e-17	PVT3	Mpp5	1.47222
Sipa1l1	6.89281e-66	3.74893	0.714	0.485	2.30923e-61	PVT3	Sipa1l1	1.47216
Tspan4	3.21282e-13	0.568983	0.297	0.202	1.07636e-08	PVT3	Tspan4	1.4703
Kctd6	4.51538e-21	1.292	0.409	0.279	1.51274e-16	PVT3	Kctd6	1.46595
Wdr6	4.53753e-27	0.643341	0.514	0.352	1.52016e-22	PVT3	Wdr6	1.46023
Gm15577	3.97839e-25	5.67716	0.489	0.335	1.33284e-20	PVT3	Gm15577	1.4597
Fam124a	1.34781e-33	3.91137	0.554	0.381	4.51543e-29	PVT3	Fam124a	1.45407
Rsph3a	1.01251e-11	0.937577	0.282	0.194	3.3921e-07	PVT3	Rsph3a	1.45361
Siah1a	1.46036e-22	0.783091	0.481	0.331	4.89249e-18	PVT3	Siah1a	1.45317
Gm10516	3.63205e-37	5.24863	0.573	0.395	1.21681e-32	PVT3	Gm10516	1.45063
Ttyh3	2.366e-33	1.16816	0.562	0.388	7.92658e-29	PVT3	Ttyh3	1.44845
2023-09-04	8.69336e-17	1.00643	0.384	0.266	2.91245e-12	PVT3	2023-09-04	1.44361
Hhat	2.81757e-10	0.6772	0.267	0.185	9.43943e-06	PVT3	Hhat	1.44324
Sox111	1.22538e-20	0.798706	0.451	0.313	4.10526e-16	PVT3	Sox11	1.44089
Nr6a1os	4.15345e-20	4.53998	0.458	0.318	1.39149e-15	PVT3	Nr6a1os	1.44025
Usp25	3.75607e-42	5.02738	0.649	0.451	1.25836e-37	PVT3	Usp25	1.43902
Bcl2	5.26434e-51	9.70604	0.729	0.507	1.76366e-46	PVT3	Bcl2	1.43787
Itpk1	1.6574e-30	4.08799	0.532	0.37	5.55262e-26	PVT3	Itpk1	1.43784
Zc3h12c	3.23288e-95	3.01424	0.794	0.553	1.08308e-90	PVT3	Zc3h12c	1.4358
Parp11	1.97305e-14	0.546522	0.342	0.239	6.6101e-10	PVT3	Parp11	1.43096
Mtx1	9.98808e-08	11.245	0.213	0.149	0.00334621	PVT3	Mtx1	1.42953
Efhc2	2.95906e-10	0.892158	0.27	0.189	9.91345e-06	PVT3	Efhc2	1.42857
Rac3	2.87892e-14	0.566449	0.368	0.258	9.64497e-10	PVT3	Rac3	1.42636
Izumo4	1.91041e-20	0.652314	0.472	0.331	6.40024e-16	PVT3	Izumo4	1.42598
Nek101	7.24044e-36	2.36604	0.637	0.447	2.42569e-31	PVT3	Nek10	1.42506
Pcolce2	6.03568e-35	6.37784	0.581	0.408	2.02207e-30	PVT3	Pcolce2	1.42402
Galnt14	3.66489e-107	11.8152	0.85	0.597	1.22781e-102	PVT3	Galnt14	1.42379
Fbl	1.37151e-11	0.973262	0.3	0.211	4.59482e-07	PVT3	Fbl	1.4218
Nxpe3	3.90306e-22	1.31838	0.463	0.326	1.3076e-17	PVT3	Nxpe3	1.42025
Sfmbt21	6.57805e-27	3.06539	0.546	0.385	2.20378e-22	PVT3	Sfmbt2	1.41818
4930570G19Rik	1.05722e-16	1.71546	0.385	0.272	3.54188e-12	PVT3	4930570G19Rik	1.41544
Rps6ka2	1.55414e-53	5.50978	0.747	0.528	5.20669e-49	PVT3	Rps6ka2	1.41477
St3gal2	3.57155e-14	0.556313	0.345	0.244	1.19654e-09	PVT3	St3gal2	1.41393
Kcnj12	1.29466e-23	2.28902	0.499	0.353	4.33736e-19	PVT3	Kcnj12	1.4136
Pde9a1	2.37731e-58	2.7641	0.698	0.494	7.96446e-54	PVT3	Pde9a	1.41296
Lman2l	2.94585e-32	2.01373	0.569	0.403	9.86919e-28	PVT3	Lman2l	1.41191
Gm27008	1.31866e-23	1.997	0.498	0.353	4.41776e-19	PVT3	Gm27008	1.41076
Radil	4.424e-39	0.635267	0.65	0.461	1.48213e-34	PVT3	Radil	1.40998
Lncbate1	3.53434e-14	2.39263	0.406	0.288	1.18407e-09	PVT3	Lncbate1	1.40972
Arrb1	4.17616e-47	1.24284	0.658	0.467	1.3991e-42	PVT3	Arrb1	1.40899
5330439K02Rik	2.62063e-08	1.74362	0.231	0.164	0.000877963	PVT3	5330439K02Rik	1.40854
Mboat1	1.35524e-10	3.2672	0.307	0.218	4.54032e-06	PVT3	Mboat1	1.40826
Gm17227	1.62547e-21	1.40151	0.477	0.339	5.44564e-17	PVT3	Gm17227	1.40708
Pdlim5	2.75626e-32	2.6998	0.612	0.435	9.23402e-28	PVT3	Pdlim5	1.4069
Ippk	1.41936e-11	1.03273	0.302	0.215	4.75514e-07	PVT3	Ippk	1.40465
Rogdi1	5.66662e-32	0.675109	0.57	0.406	1.89843e-27	PVT3	Rogdi	1.40394
Tdrd71	1.73433e-21	2.72726	0.467	0.333	5.81036e-17	PVT3	Tdrd7	1.4024
Sh3pxd2a1	7.03199e-29	1.27927	0.575	0.411	2.35586e-24	PVT3	Sh3pxd2a	1.39903
Ralgds	5.97613e-16	0.829983	0.412	0.295	2.00212e-11	PVT3	Ralgds	1.39661
Orai2	2.11897e-17	2.35775	0.41	0.294	7.09897e-13	PVT3	Orai2	1.39456
Tmod3	2.5043e-21	1.56383	0.482	0.346	8.38992e-17	PVT3	Tmod3	1.39306
Angptl2	2.85636e-19	0.978756	0.475	0.341	9.56939e-15	PVT3	Angptl2	1.39296
Gm16894	5.67286e-12	0.55345	0.328	0.236	1.90052e-07	PVT3	Gm16894	1.38983
Slc11a2	4.49383e-12	0.511828	0.346	0.249	1.50552e-07	PVT3	Slc11a2	1.38956
Sh3bp5	6.37864e-18	0.724065	0.45	0.324	2.13697e-13	PVT3	Sh3bp5	1.38889
Stk32c1	9.25671e-17	1.58034	0.461	0.332	3.10118e-12	PVT3	Stk32c	1.38855
Erlin1	6.29878e-13	0.923648	0.372	0.268	2.11022e-08	PVT3	Erlin1	1.38806
Dlgap2	6.30669e-210	27.6607	0.97	0.699	2.11287e-205	PVT3	Dlgap2	1.3877
Pcdh15	4.16153e-299	42.1687	0.988	0.712	1.3942e-294	PVT3	Pcdh15	1.38764
Gm26981	4.22664e-07	0.514867	0.233	0.168	0.0141601	PVT3	Gm26981	1.3869
Hmgcl	4.6778e-19	0.965439	0.449	0.324	1.56716e-14	PVT3	Hmgcl	1.3858
Gm49179	4.58818e-11	0.957007	0.32	0.231	1.53713e-06	PVT3	Gm49179	1.38528
Pvt11	3.05798e-60	0.766798	0.795	0.575	1.02448e-55	PVT3	Pvt1	1.38261
Begain1	3.11514e-17	0.643537	0.471	0.341	1.04363e-12	PVT3	Begain	1.38123
Lrrk2	1.85795e-16	13.2988	0.427	0.31	6.22451e-12	PVT3	Lrrk2	1.37742
Exoc61	2.59119e-50	1.77236	0.76	0.552	8.68102e-46	PVT3	Exoc6	1.37681
Hif1a	2.06722e-25	2.39775	0.535	0.39	6.92561e-21	PVT3	Hif1a	1.37179
Pknox2	6.63384e-20	5.01246	0.524	0.382	2.22247e-15	PVT3	Pknox2	1.37173
Tet1	5.03638e-29	5.85686	0.563	0.411	1.68729e-24	PVT3	Tet1	1.36983
Ttc26	2.14561e-14	0.943228	0.401	0.293	7.18823e-10	PVT3	Ttc26	1.3686
Cdkl2	1.11153e-18	1.38833	0.457	0.334	3.72385e-14	PVT3	Cdkl2	1.36826
Mbd2	1.32982e-51	6.31078	0.735	0.538	4.45516e-47	PVT3	Mbd2	1.36617
Invs	1.7786e-18	1.20679	0.493	0.361	5.95867e-14	PVT3	Invs	1.36565
Ablim2	2.90685e-64	3.24256	0.766	0.561	9.73851e-60	PVT3	Ablim2	1.36542
Nudcd1	3.5863e-14	0.822539	0.419	0.307	1.20148e-09	PVT3	Nudcd1	1.36482
Gm16835	2.99108e-07	1.15807	0.232	0.17	0.0100207	PVT3	Gm16835	1.36471
Gm26854	4.10387e-33	3.08947	0.643	0.472	1.37488e-28	PVT3	Gm26854	1.36229
Slc16a4	2.88399e-11	1.43447	0.347	0.255	9.66195e-07	PVT3	Slc16a4	1.36078
Rpa1	9.09989e-12	0.658879	0.37	0.272	3.04865e-07	PVT3	Rpa1	1.36029
Capn2	1.99847e-17	0.880986	0.478	0.352	6.69527e-13	PVT3	Capn2	1.35795
Id4	1.6975e-27	1.01294	0.592	0.436	5.68696e-23	PVT3	Id4	1.3578
Aacs	1.15342e-25	1.63533	0.57	0.42	3.86418e-21	PVT3	Aacs	1.35714
N4bp1	1.03787e-21	0.931092	0.535	0.395	3.47708e-17	PVT3	N4bp1	1.35443
Gm11802	3.18916e-10	1.12772	0.329	0.243	1.06843e-05	PVT3	Gm11802	1.35391
Qtrt2	1.16224e-09	0.729309	0.311	0.23	3.89373e-05	PVT3	Qtrt2	1.35217
Rragd	4.54844e-12	0.681182	0.381	0.282	1.52382e-07	PVT3	Rragd	1.35106
Sec11c	1.68175e-18	0.576487	0.482	0.357	5.63419e-14	PVT3	Sec11c	1.35014
Tmem132a	1.93777e-82	5.71719	0.874	0.648	6.4919e-78	PVT3	Tmem132a	1.34877
Spink10	5.7989e-28	3.8665	0.581	0.431	1.94275e-23	PVT3	Spink10	1.34803
Vipr2	2.97052e-10	1.75689	0.358	0.266	9.95183e-06	PVT3	Vipr2	1.34586
Fam229b	4.35813e-13	0.815435	0.366	0.272	1.46006e-08	PVT3	Fam229b	1.34559
4933424G06Rik	2.73145e-09	0.794703	0.329	0.245	9.15092e-05	PVT3	4933424G06Rik	1.34286
Fez2	1.14346e-10	1.90442	0.333	0.248	3.83084e-06	PVT3	Fez2	1.34274
Dlg51	1.27452e-25	1.59316	0.558	0.416	4.26989e-21	PVT3	Dlg5	1.34135
Sema3c	5.26137e-16	17.597	0.456	0.34	1.76266e-11	PVT3	Sema3c	1.34118
Dock2	2.80032e-20	18.3946	0.598	0.446	9.38162e-16	PVT3	Dock2	1.34081
Snx21	1.52134e-14	0.638745	0.437	0.326	5.0968e-10	PVT3	Snx21	1.34049
2023-09-01	2.22052e-07	0.55918	0.256	0.191	0.00743919	PVT3	2023-09-01	1.34031
Plch11	1.2245e-08	0.84927	0.272	0.203	0.00041023	PVT3	Plch1	1.3399
Csad	1.35498e-12	0.778455	0.415	0.31	4.53946e-08	PVT3	Csad	1.33871
Fam102b	9.41728e-16	1.3372	0.471	0.352	3.15498e-11	PVT3	Fam102b	1.33807
Gm472711	2.9121e-27	1.16758	0.614	0.459	9.7561e-23	PVT3	Gm47271	1.33769
Mta3	4.64958e-25	1.25225	0.583	0.436	1.5577e-20	PVT3	Mta3	1.33716
Agpat5	6.83369e-48	4.19625	0.73	0.546	2.28942e-43	PVT3	Agpat5	1.337
Lrrc20	2.80797e-12	4.19858	0.4	0.3	9.40727e-08	PVT3	Lrrc20	1.33333
Drc1	2.55187e-08	0.72349	0.302	0.227	0.000854929	PVT3	Drc1	1.3304
Nprl3	4.2338e-13	0.821086	0.431	0.324	1.41841e-08	PVT3	Nprl3	1.33025
Sp3	4.0014e-12	1.00733	0.411	0.309	1.34055e-07	PVT3	Sp3	1.3301
Zfp956	3.2669e-11	0.83738	0.381	0.287	1.09448e-06	PVT3	Zfp956	1.32753
Foxk1	2.81152e-12	1.10457	0.39	0.294	9.41916e-08	PVT3	Foxk1	1.32653
Stx2	1.03038e-11	1.61184	0.415	0.313	3.45198e-07	PVT3	Stx2	1.32588
Gm14399	1.20766e-11	1.02449	0.403	0.304	4.0459e-07	PVT3	Gm14399	1.32566
Zswim5	6.91478e-09	2.07428	0.33	0.249	0.000231659	PVT3	Zswim5	1.3253
Rasgrf2	8.9061e-102	11.8311	0.906	0.684	2.98372e-97	PVT3	Rasgrf2	1.32456
Ncoa3	2.82711e-17	0.99407	0.511	0.386	9.47139e-13	PVT3	Ncoa3	1.32383
Bcr	7.07117e-33	3.03349	0.684	0.517	2.36898e-28	PVT3	Bcr	1.32302
Traf3ip2	3.84323e-17	3.45954	0.467	0.353	1.28756e-12	PVT3	Traf3ip2	1.32295
Gm10069	1.55792e-07	0.623764	0.291	0.22	0.00521934	PVT3	Gm10069	1.32273
1700019D03Rik	1.10931e-23	3.68173	0.604	0.457	3.71642e-19	PVT3	1700019D03Rik	1.32166
Slc35d1	3.98958e-07	1.1625	0.268	0.203	0.0133659	PVT3	Slc35d1	1.3202
Rffl	5.32408e-09	0.686804	0.326	0.247	0.000178367	PVT3	Rffl	1.31984
Tbc1d1	4.99884e-13	4.90433	0.417	0.316	1.67471e-08	PVT3	Tbc1d1	1.31962
Gm17494	9.95074e-09	0.611818	0.31	0.235	0.00033337	PVT3	Gm17494	1.31915
Gm14372	6.79456e-10	0.958877	0.369	0.28	2.27631e-05	PVT3	Gm14372	1.31786
Tiam1	9.63298e-37	2.78545	0.676	0.513	3.22724e-32	PVT3	Tiam1	1.31774
Chst8	1.02809e-33	4.60313	0.719	0.547	3.44431e-29	PVT3	Chst8	1.31444
Klhl8	4.37331e-09	0.88719	0.335	0.255	0.000146515	PVT3	Klhl8	1.31373
Cacng7	8.44694e-18	1.53802	0.491	0.374	2.82989e-13	PVT3	Cacng7	1.31283
Gm26848	1.81395e-24	16.0547	0.387	0.295	6.07709e-20	PVT3	Gm26848	1.31186
Gm26699	4.22017e-08	0.901142	0.295	0.225	0.00141384	PVT3	Gm26699	1.31111
Psd	1.76667e-15	1.22394	0.49	0.374	5.91871e-11	PVT3	Psd	1.31016
Ephb2	2.14386e-24	3.26086	0.614	0.469	7.18237e-20	PVT3	Ephb2	1.30917
Gm46218	2.09507e-10	0.550299	0.377	0.288	7.0189e-06	PVT3	Gm46218	1.30903
Rasgef1a	3.48791e-28	0.582768	0.667	0.51	1.16852e-23	PVT3	Rasgef1a	1.30784
Arvcf	4.40719e-14	1.54612	0.459	0.351	1.4765e-09	PVT3	Arvcf	1.30769
Lrrc4	6.7277e-56	4.57999	0.808	0.618	2.25391e-51	PVT3	Lrrc4	1.30744
Ebpl	8.91913e-10	10.3322	0.362	0.277	2.98809e-05	PVT3	Ebpl	1.30686
Scml4	5.50384e-10	0.979752	0.423	0.324	1.8439e-05	PVT3	Scml4	1.30556
Fig4	6.33426e-11	0.652269	0.429	0.329	2.12211e-06	PVT3	Fig4	1.30395
Rfx3	2.66001e-201	21.0114	0.941	0.722	8.91156e-197	PVT3	Rfx3	1.30332
Psd2	6.83333e-08	0.680556	0.293	0.225	0.0022893	PVT3	Psd2	1.30222
Lnx1	1.39731e-22	3.42206	0.6	0.461	4.68126e-18	PVT3	Lnx1	1.30152
Nagk	1.12443e-15	0.588376	0.518	0.398	3.76708e-11	PVT3	Nagk	1.30151
Ubxn11	1.23642e-08	0.513893	0.359	0.276	0.000414226	PVT3	Ubxn11	1.30072
Nxpe2	9.87321e-09	3.54301	0.359	0.276	0.000330772	PVT3	Nxpe2	1.30072
Iqsec3	4.40451e-98	7.77552	0.867	0.667	1.4756e-93	PVT3	Iqsec3	1.29985
Mkln1os	1.29292e-12	1.91386	0.456	0.351	4.33155e-08	PVT3	Mkln1os	1.29915
Nck2	6.32273e-17	0.518788	0.561	0.432	2.11824e-12	PVT3	Nck2	1.29861
E2f3	5.18613e-17	1.11457	0.56	0.432	1.73746e-12	PVT3	E2f3	1.2963
Itgb3bp	5.14578e-15	0.699867	0.509	0.393	1.72394e-10	PVT3	Itgb3bp	1.29517
Comt	6.09733e-30	1.32056	0.707	0.546	2.04273e-25	PVT3	Comt	1.29487
Bcas3os1	1.38162e-07	0.945304	0.312	0.241	0.00462871	PVT3	Bcas3os1	1.29461
Maml3	2.96308e-80	44.9417	0.875	0.676	9.92691e-76	PVT3	Maml3	1.29438
Sorl1	4.56553e-44	4.41889	0.766	0.592	1.52954e-39	PVT3	Sorl1	1.29392
Dcaf17	1.54192e-12	0.910092	0.472	0.365	5.16575e-08	PVT3	Dcaf17	1.29315
Ttc281	2.61812e-75	3.36908	0.914	0.707	8.77122e-71	PVT3	Ttc28	1.29279
Shoc2	3.13192e-16	1.94688	0.54	0.418	1.04926e-11	PVT3	Shoc2	1.29187
Fam20b	4.18937e-09	0.511659	0.364	0.282	0.000140352	PVT3	Fam20b	1.29078
Prmt8	1.52595e-19	1.43762	0.615	0.477	5.11222e-15	PVT3	Prmt8	1.28931
Ttc39c	1.11595e-36	1.51046	0.706	0.548	3.73867e-32	PVT3	Ttc39c	1.28832
Celf6	5.0039e-11	0.585162	0.467	0.363	1.67641e-06	PVT3	Celf6	1.2865
Slc16a11	7.53728e-07	1.21532	0.34	0.265	0.0252514	PVT3	Slc16a11	1.28302
Fam162a	1.61453e-07	1.55253	0.313	0.244	0.00540899	PVT3	Fam162a	1.28279
Bbs7	3.72414e-12	2.16796	0.468	0.365	1.24766e-07	PVT3	Bbs7	1.28219
Fancc	2.29657e-16	2.13127	0.493	0.385	7.69397e-12	PVT3	Fancc	1.28052
Fbxo21	7.99863e-16	1.46463	0.544	0.425	2.6797e-11	PVT3	Fbxo21	1.28
Pik3cb	9.67499e-31	1.74102	0.709	0.554	3.24131e-26	PVT3	Pik3cb	1.27978
Sec14l1	1.99074e-09	1.32198	0.398	0.311	6.66936e-05	PVT3	Sec14l1	1.27974
Kat2b	5.1078e-12	0.986376	0.454	0.355	1.71121e-07	PVT3	Kat2b	1.27887
Flvcr1	4.34845e-13	1.35589	0.477	0.373	1.45682e-08	PVT3	Flvcr1	1.27882
Parn	1.45246e-10	0.901551	0.442	0.346	4.86603e-06	PVT3	Parn	1.27746
Tram1	4.86852e-12	3.19351	0.449	0.353	1.63105e-07	PVT3	Tram1	1.27195
Kif26b	6.54848e-43	1.58432	0.773	0.608	2.19387e-38	PVT3	Kif26b	1.27138
Setd4	3.84244e-15	0.562732	0.517	0.407	1.28729e-10	PVT3	Setd4	1.27027
Prelid3a	3.99654e-11	0.684422	0.421	0.332	1.33892e-06	PVT3	Prelid3a	1.26807
Pi4kb1	5.80131e-11	0.62502	0.479	0.378	1.94356e-06	PVT3	Pi4kb	1.2672
Itprid2	2.6032e-07	0.932476	0.328	0.259	0.00872123	PVT3	Itprid2	1.26641
Dtnbp1	1.11757e-13	1.21482	0.484	0.383	3.74409e-09	PVT3	Dtnbp1	1.26371
Cobl	6.2445e-113	1.14925	0.877	0.694	2.09203e-108	PVT3	Cobl	1.26369
Pcgf6	1.97576e-11	0.782529	0.47	0.372	6.61919e-07	PVT3	Pcgf6	1.26344
Lrrn3	3.55062e-16	2.11058	0.635	0.503	1.18953e-11	PVT3	Lrrn3	1.26243
Tulp4	1.32666e-72	10.0307	0.839	0.665	4.44458e-68	PVT3	Tulp4	1.26165
Mink11	1.17192e-15	1.82681	0.542	0.43	3.92617e-11	PVT3	Mink1	1.26047
Gm16189	9.88099e-09	3.98527	0.412	0.327	0.000331033	PVT3	Gm16189	1.25994
Wdfy2	1.20764e-15	1.07141	0.574	0.456	4.04583e-11	PVT3	Wdfy2	1.25877
Rorb	4.73025e-123	19.6805	0.978	0.777	1.58473e-118	PVT3	Rorb	1.25869
Micu11	7.27803e-20	2.64492	0.611	0.486	2.43829e-15	PVT3	Micu1	1.2572
Edaradd	1.6467e-13	4.82085	0.544	0.433	5.51678e-09	PVT3	Edaradd	1.25635
Ccdc148	1.63351e-76	6.68344	0.876	0.699	5.47258e-72	PVT3	Ccdc148	1.25322
Slit3	2.11696e-31	28.0687	0.956	0.763	7.09225e-27	PVT3	Slit3	1.25295
Lactb2	2.01801e-16	1.01738	0.6	0.479	6.76074e-12	PVT3	Lactb2	1.25261
Tbc1d4	3.29701e-12	6.67118	0.472	0.377	1.10456e-07	PVT3	Tbc1d4	1.25199
Gm15446	7.48135e-07	0.58451	0.323	0.258	0.025064	PVT3	Gm15446	1.25194
Hibch	7.28335e-17	2.34638	0.593	0.474	2.44007e-12	PVT3	Hibch	1.25105
Ddr1	6.6442e-11	0.846338	0.444	0.355	2.22594e-06	PVT3	Ddr1	1.2507
Gkap1	4.93913e-21	6.66559	0.661	0.529	1.65471e-16	PVT3	Gkap1	1.24953
Fam214b	2.6244e-11	0.88091	0.482	0.386	8.79226e-07	PVT3	Fam214b	1.2487
Sc5d	9.50295e-14	0.70413	0.59	0.473	3.18368e-09	PVT3	Sc5d	1.24736
Mras	1.14499e-10	1.02579	0.449	0.36	3.83594e-06	PVT3	Mras	1.24722
Tex2	3.01554e-18	1.94192	0.598	0.48	1.01027e-13	PVT3	Tex2	1.24583
Exosc7	2.31138e-08	0.567278	0.386	0.31	0.00077436	PVT3	Exosc7	1.24516
Ece1	3.13418e-14	2.70753	0.58	0.466	1.05001e-09	PVT3	Ece1	1.24464
Nfkb1	2.20203e-26	1.66785	0.652	0.524	7.37724e-22	PVT3	Nfkb1	1.24427
Gm11906	4.02587e-11	4.7487	0.459	0.369	1.34875e-06	PVT3	Gm11906	1.2439
Gas2	7.54849e-34	10.8339	0.74	0.595	2.5289e-29	PVT3	Gas2	1.2437
Fbxw8	7.06575e-14	1.55774	0.543	0.437	2.36717e-09	PVT3	Fbxw8	1.24256
Abhd17b	1.94472e-09	0.863513	0.462	0.372	6.51521e-05	PVT3	Abhd17b	1.24194
Camk2g	7.04233e-12	0.570507	0.504	0.406	2.35932e-07	PVT3	Camk2g	1.24138
Tspan331	5.09098e-15	0.851884	0.579	0.467	1.70558e-10	PVT3	Tspan33	1.23983
Echdc1	1.32247e-09	0.602476	0.436	0.352	4.43053e-05	PVT3	Echdc1	1.23864
Fdft11	8.3147e-16	2.16379	0.583	0.471	2.78559e-11	PVT3	Fdft1	1.23779
Gpr45	1.50853e-20	2.48726	0.642	0.519	5.05389e-16	PVT3	Gpr45	1.23699
Fam135b	6.7767e-63	6.53856	0.849	0.687	2.27033e-58	PVT3	Fam135b	1.23581
Grk51	1.99596e-08	0.593393	0.446	0.361	0.000668685	PVT3	Grk5	1.23546
Map2k6	4.34492e-07	2.18188	0.388	0.315	0.0145564	PVT3	Map2k6	1.23175
Uxs1	2.0313e-13	1.70197	0.55	0.447	6.80527e-09	PVT3	Uxs1	1.23043
Timmdc1	1.21521e-12	1.85091	0.529	0.43	4.07121e-08	PVT3	Timmdc1	1.23023
Kdm2b	9.6725e-12	0.907549	0.53	0.431	3.24048e-07	PVT3	Kdm2b	1.2297
Tbc1d24	3.49803e-09	1.33257	0.44	0.358	0.000117191	PVT3	Tbc1d24	1.22905
Gm12353	4.8801e-14	1.214	0.588	0.479	1.63493e-09	PVT3	Gm12353	1.22756
Galnt2	9.11273e-18	5.36737	0.509	0.415	3.05295e-13	PVT3	Galnt2	1.22651
Cenpp	8.82664e-08	0.787632	0.439	0.358	0.0029571	PVT3	Cenpp	1.22626
Slc6a71	7.85808e-23	2.09104	0.678	0.553	2.63261e-18	PVT3	Slc6a7	1.22604
Slc38a9	7.31547e-30	3.01613	0.734	0.599	2.45083e-25	PVT3	Slc38a9	1.22538
Ppp1r2	6.1718e-08	1.01165	0.441	0.36	0.00206768	PVT3	Ppp1r2	1.225
Gm32647	3.05812e-155	213.838	1	0.817	1.02453e-150	PVT3	Gm32647	1.22399
Nln1	6.27203e-22	2.24088	0.662	0.541	2.10126e-17	PVT3	Nln	1.22366
Tmem243	2.60849e-15	1.22793	0.624	0.51	8.73897e-11	PVT3	Tmem243	1.22353
Mamld1	4.47545e-07	0.686198	0.389	0.318	0.0149936	PVT3	Mamld1	1.22327
Dbn1	3.81998e-22	2.00937	0.668	0.547	1.27977e-17	PVT3	Dbn1	1.22121
Rnf1121	3.91901e-38	1.45231	0.829	0.679	1.31295e-33	PVT3	Rnf112	1.22091
Bckdhb	7.12876e-15	2.25365	0.622	0.51	2.38828e-10	PVT3	Bckdhb	1.21961
Nsun7	2.2788e-12	0.915149	0.55	0.451	7.63443e-08	PVT3	Nsun7	1.21951
Stx7	5.77147e-07	0.611588	0.439	0.36	0.0193356	PVT3	Stx7	1.21944
Nptxr	7.95082e-141	4.58013	0.974	0.799	2.66368e-136	PVT3	Nptxr	1.21902
Shisal11	2.16753e-16	1.0318	0.507	0.416	7.26165e-12	PVT3	Shisal1	1.21875
Slc9a1	1.55496e-11	1.05853	0.524	0.43	5.20944e-07	PVT3	Slc9a1	1.2186
Arhgef28	9.50825e-18	11.7349	0.609	0.5	3.18545e-13	PVT3	Arhgef28	1.218
Gng2	2.95432e-46	3.78944	0.799	0.656	9.89757e-42	PVT3	Gng2	1.21799
Cbx6	4.70063e-09	2.48437	0.427	0.352	0.000157481	PVT3	Cbx6	1.21307
Cdc42bpb	1.15974e-17	1.6024	0.632	0.521	3.88537e-13	PVT3	Cdc42bpb	1.21305
Vstm2a	4.00064e-07	0.684744	0.424	0.35	0.0134029	PVT3	Vstm2a	1.21143
Cnot6l	4.20526e-32	10.2343	0.757	0.625	1.40884e-27	PVT3	Cnot6l	1.2112
Eno2	1.13278e-16	0.567652	0.638	0.528	3.79505e-12	PVT3	Eno2	1.20833
Tfcp2	2.54455e-10	0.740848	0.512	0.424	8.52476e-06	PVT3	Tfcp2	1.20755
Rreb1	1.33795e-15	5.89446	0.726	0.602	4.4824e-11	PVT3	Rreb1	1.20598
Lamc1	1.09645e-08	0.827567	0.458	0.38	0.000367333	PVT3	Lamc1	1.20526
Abhd12	3.18722e-26	0.554264	0.766	0.636	1.06778e-21	PVT3	Abhd12	1.2044
Meaf6	2.43844e-10	0.682155	0.554	0.46	8.16927e-06	PVT3	Meaf6	1.20435
Fbxo10	1.31874e-12	0.757895	0.602	0.501	4.41803e-08	PVT3	Fbxo10	1.2016
Dph6	6.147e-07	2.07573	0.459	0.382	0.0205937	PVT3	Dph6	1.20157
Klf81	2.71844e-14	1.10055	0.639	0.532	9.10731e-10	PVT3	Klf8	1.20113
Nipal3	3.66994e-10	0.545895	0.49	0.408	1.2295e-05	PVT3	Nipal3	1.20098
Rcor3	1.0057e-09	0.991945	0.532	0.443	3.36931e-05	PVT3	Rcor3	1.2009
Cab39l	1.21435e-13	2.59274	0.622	0.518	4.0683e-09	PVT3	Cab39l	1.20077
Nr3c1	1.78157e-34	16.1885	0.836	0.698	5.96863e-30	PVT3	Nr3c1	1.19771
Fnbp1l	4.79501e-46	5.0814	0.904	0.755	1.60642e-41	PVT3	Fnbp1l	1.19735
Fndc3a	9.46922e-37	3.09165	0.85	0.71	3.17238e-32	PVT3	Fndc3a	1.19718
Slc22a15	3.59606e-09	5.41501	0.526	0.44	0.000120475	PVT3	Slc22a15	1.19545
Wdpcp	1.12962e-06	10.9933	0.441	0.369	0.0378446	PVT3	Wdpcp	1.19512
Arhgap39	5.47434e-49	4.9759	0.828	0.693	1.83401e-44	PVT3	Arhgap39	1.19481
Pfkp	2.11684e-24	5.33443	0.728	0.611	7.09184e-20	PVT3	Pfkp	1.19149
St6galnac3	3.03852e-28	11.3355	0.822	0.69	1.01797e-23	PVT3	St6galnac3	1.1913
Dpysl51	1.51617e-42	2.66215	0.836	0.702	5.07947e-38	PVT3	Dpysl5	1.19088
Ola1	2.02021e-25	2.02245	0.749	0.629	6.76811e-21	PVT3	Ola1	1.19078
Papss1	9.82024e-07	0.54176	0.431	0.362	0.0328998	PVT3	Papss1	1.19061
Smpd3	1.14994e-06	6.14863	0.407	0.342	0.0385252	PVT3	Smpd3	1.19006
E130307A14Rik	1.25529e-34	2.7338	0.791	0.665	4.20546e-30	PVT3	E130307A14Rik	1.18947
Mfap3	1.22709e-08	2.7068	0.534	0.449	0.000411101	PVT3	Mfap3	1.18931
D430042O09Rik	1.93034e-10	1.39737	0.573	0.482	6.46704e-06	PVT3	D430042O09Rik	1.1888
Gnaz	5.5088e-08	1.29962	0.512	0.431	0.00184556	PVT3	Gnaz	1.18794
Pip5k1b	7.78218e-23	2.8585	0.765	0.644	2.60718e-18	PVT3	Pip5k1b	1.18789
Abl1	2.95239e-08	3.43344	0.525	0.442	0.000989111	PVT3	Abl1	1.18778
Rsu11	4.61062e-11	1.37032	0.583	0.491	1.54465e-06	PVT3	Rsu1	1.18737
Lingo1	1.59066e-90	27.7267	0.926	0.78	5.32902e-86	PVT3	Lingo1	1.18718
Smyd4	1.27344e-06	0.70187	0.433	0.365	0.0426628	PVT3	Smyd4	1.1863
Pacs2	7.6086e-11	0.608721	0.561	0.473	2.54903e-06	PVT3	Pacs2	1.18605
Tnks	4.63724e-58	1.13861	0.849	0.716	1.55357e-53	PVT3	Tnks	1.18575
Trip4	6.73768e-10	6.81921	0.563	0.475	2.25726e-05	PVT3	Trip4	1.18526
Cpeb21	1.38677e-23	1.31514	0.757	0.639	4.64595e-19	PVT3	Cpeb2	1.18466
Eif2ak4	3.59187e-11	0.99911	0.569	0.481	1.20335e-06	PVT3	Eif2ak4	1.18295
Wdr17	4.52373e-17	19.994	0.712	0.602	1.51554e-12	PVT3	Wdr17	1.18272
Agl	1.70833e-07	3.33275	0.479	0.405	0.00572323	PVT3	Agl	1.18272
Dop1b	8.78354e-11	2.91669	0.487	0.413	2.94266e-06	PVT3	Dop1b	1.17918
Chst11	2.21037e-43	4.12847	0.837	0.711	7.40517e-39	PVT3	Chst11	1.17722
2610037D02Rik	5.51591e-13	0.969275	0.671	0.57	1.84794e-08	PVT3	2610037D02Rik	1.17719
Erbin	2.13206e-11	0.653612	0.59	0.502	7.14281e-07	PVT3	Erbin	1.1753
Cnnm1	2.38536e-13	0.792864	0.651	0.554	7.99142e-09	PVT3	Cnnm1	1.17509
Lmbrd2	1.30699e-13	1.64055	0.621	0.529	4.37869e-09	PVT3	Lmbrd2	1.17391
6430548M08Rik	3.97373e-09	8.00883	0.434	0.37	0.000133128	PVT3	6430548M08Rik	1.17297
Zfp532	1.7023e-63	21.2322	0.875	0.746	5.70306e-59	PVT3	Zfp532	1.17292
Chn2	5.00302e-08	2.11885	0.74	0.631	0.00167611	PVT3	Chn2	1.17274
Map2k1	8.54762e-10	1.72577	0.539	0.461	2.86362e-05	PVT3	Map2k1	1.1692
Ino80dos	2.47594e-08	0.525056	0.56	0.479	0.00082949	PVT3	Ino80dos	1.1691
Snx10	9.95653e-26	4.89313	0.838	0.718	3.33564e-21	PVT3	Snx10	1.16713
Slc38a6	7.32711e-08	2.49728	0.589	0.505	0.00245473	PVT3	Slc38a6	1.16634
Rapgef11	3.56692e-16	0.767257	0.682	0.585	1.19499e-11	PVT3	Rapgef1	1.16581
Cntn6	1.38373e-51	10.9494	0.976	0.838	4.63576e-47	PVT3	Cntn6	1.16468
Fam184a	6.71715e-18	4.7883	0.744	0.639	2.25038e-13	PVT3	Fam184a	1.16432
Slc4a8	1.08605e-08	0.706973	0.547	0.47	0.000363849	PVT3	Slc4a8	1.16383
Gramd1b	2.5575e-38	3.12426	0.798	0.686	8.56813e-34	PVT3	Gramd1b	1.16327
Gm11149	2.89301e-18	1.32662	0.785	0.675	9.69216e-14	PVT3	Gm11149	1.16296
Iqsec2	4.45615e-18	9.82129	0.715	0.615	1.4929e-13	PVT3	Iqsec2	1.1626
Ptprf	2.12882e-13	0.632114	0.644	0.554	7.13197e-09	PVT3	Ptprf	1.16245
Crtc3	1.77022e-14	1.16777	0.709	0.61	5.93059e-10	PVT3	Crtc3	1.1623
Adgra1	1.15614e-11	5.54635	0.869	0.748	3.87329e-07	PVT3	Adgra1	1.16176
Atp10a	2.79349e-14	3.99028	0.728	0.627	9.35876e-10	PVT3	Atp10a	1.16108
Ptprm	3.08671e-174	11.678	0.99	0.854	1.03411e-169	PVT3	Ptprm	1.15925
Tsga10	8.95713e-08	0.744181	0.503	0.434	0.00300082	PVT3	Tsga10	1.15899
Irf2	4.3584e-09	1.26935	0.678	0.586	0.000146015	PVT3	Irf2	1.157
Actr3	2.7379e-07	0.598262	0.509	0.44	0.00917251	PVT3	Actr3	1.15682
Runx1t1	2.27641e-132	12.1263	0.97	0.839	7.62642e-128	PVT3	Runx1t1	1.15614
Dzip1	1.46951e-11	1.59728	0.595	0.515	4.92316e-07	PVT3	Dzip1	1.15534
Klhl32	5.67569e-09	3.06434	0.692	0.599	0.000190147	PVT3	Klhl32	1.15526
Cntnap5c	2.59433e-18	35.656	0.841	0.73	8.69153e-14	PVT3	Cntnap5c	1.15205
Pitpnm2	5.56315e-08	1.66634	0.614	0.533	0.00186377	PVT3	Pitpnm2	1.15197
Ggact	3.81283e-34	2.95747	0.874	0.76	1.27737e-29	PVT3	Ggact	1.15
Camkv	1.52851e-22	10.1143	0.82	0.714	5.12082e-18	PVT3	Camkv	1.14846
Tox3	1.14437e-17	6.50788	0.908	0.791	3.83388e-13	PVT3	Tox3	1.14791
Pcyt2	2.60894e-16	1.39822	0.748	0.653	8.74047e-12	PVT3	Pcyt2	1.14548
Sorcs2	6.2333e-45	9.32639	0.901	0.787	2.08828e-40	PVT3	Sorcs2	1.14485
Atp1b3	3.85222e-09	9.64049	0.588	0.514	0.000129057	PVT3	Atp1b3	1.14397
Rnf169	9.34495e-24	0.734477	0.846	0.74	3.13075e-19	PVT3	Rnf169	1.14324
Naa35	1.39701e-08	0.912144	0.599	0.524	0.000468027	PVT3	Naa35	1.14313
Cwc27	2.03449e-16	2.253	0.738	0.646	6.81594e-12	PVT3	Cwc27	1.14241
Wasf3	1.2705e-06	4.40941	0.586	0.513	0.0425643	PVT3	Wasf3	1.1423
Fgd4	1.18641e-32	10.9645	0.82	0.718	3.9747e-28	PVT3	Fgd4	1.14206
Spast	9.81857e-07	3.64751	0.599	0.525	0.0328942	PVT3	Spast	1.14095
Mblac2	6.99502e-08	2.63106	0.591	0.518	0.00234347	PVT3	Mblac2	1.14093
Mecr1	2.01352e-07	1.35072	0.575	0.504	0.00674571	PVT3	Mecr	1.14087
H131	5.57864e-08	0.523858	0.6	0.527	0.00186896	PVT3	H13	1.13852
Jak1	6.19742e-07	1.524	0.535	0.471	0.0207626	PVT3	Jak1	1.13588
Ccser21	2.402e-09	0.821933	0.651	0.574	8.04718e-05	PVT3	Ccser2	1.13415
Fsd1l1	1.99981e-08	0.572373	0.618	0.545	0.000669978	PVT3	Fsd1l	1.13394
Ncam2	2.98076e-139	33.5015	0.991	0.874	9.98615e-135	PVT3	Ncam2	1.13387
Sdk1	1.29862e-40	11.3989	0.804	0.71	4.35064e-36	PVT3	Sdk1	1.13239
Tmcc3	6.62169e-82	4.6197	0.986	0.871	2.2184e-77	PVT3	Tmcc3	1.13203
Reps1	6.86223e-08	0.636038	0.627	0.554	0.00229898	PVT3	Reps1	1.13177
Glt8d1	8.92e-10	1.27173	0.671	0.593	2.98838e-05	PVT3	Glt8d1	1.13153
Ypel2	3.75264e-08	5.48509	0.74	0.654	0.00125721	PVT3	Ypel2	1.1315
Epn2	3.2806e-17	4.34086	0.753	0.666	1.09907e-12	PVT3	Epn2	1.13063
Kdm5b	4.4293e-10	4.20022	0.647	0.573	1.4839e-05	PVT3	Kdm5b	1.12914
Fhod3	9.32916e-223	40.7151	0.99	0.877	3.12546e-218	PVT3	Fhod3	1.12885
Rnps1	2.06537e-08	1.4254	0.597	0.53	0.000691941	PVT3	Rnps1	1.12642
Syt141	1.5615e-15	2.64616	0.734	0.652	5.23133e-11	PVT3	Syt14	1.12577
Srsf10	7.54996e-08	5.52159	0.629	0.56	0.00252939	PVT3	Srsf10	1.12321
Ptpn121	3.12021e-09	2.23405	0.677	0.603	0.000104533	PVT3	Ptpn12	1.12272
Armc9	2.53777e-17	4.90211	0.805	0.718	8.50204e-13	PVT3	Armc9	1.12117
Nebl	2.46746e-72	23.4026	0.972	0.867	8.26648e-68	PVT3	Nebl	1.12111
Camsap2	2.58715e-08	2.99279	0.645	0.576	0.000866748	PVT3	Camsap2	1.11979
Cuedc1	3.79454e-15	0.838497	0.704	0.63	1.27125e-10	PVT3	Cuedc1	1.11746
Gm26804	7.86471e-07	40.4527	0.378	0.339	0.0263484	PVT3	Gm26804	1.11504
Rnf220	1.67707e-07	49.1261	0.995	0.893	0.00561851	PVT3	Rnf220	1.11422
Cep170	2.08381e-10	1.06306	0.759	0.682	6.9812e-06	PVT3	Cep170	1.1129
Sacm1l	1.06088e-15	4.80462	0.779	0.7	3.55417e-11	PVT3	Sacm1l	1.11286
Bend6	2.9646e-21	3.08916	0.785	0.706	9.932e-17	PVT3	Bend6	1.1119
Sec61a2	3.92101e-11	1.40278	0.768	0.691	1.31362e-06	PVT3	Sec61a2	1.11143
Abat1	1.06221e-07	1.03263	0.649	0.584	0.00355861	PVT3	Abat	1.1113
Mark21	1.9368e-16	1.13271	0.71	0.639	6.48865e-12	PVT3	Mark2	1.11111
Rtn4rl1	2.04199e-13	5.20659	0.851	0.766	6.84107e-09	PVT3	Rtn4rl1	1.11097
Rnf180	5.25186e-09	4.25285	0.744	0.671	0.000175948	PVT3	Rnf180	1.10879
Abi11	1.18956e-07	0.688822	0.662	0.598	0.00398527	PVT3	Abi1	1.10702
Timp2	3.62196e-11	2.19209	0.839	0.758	1.21343e-06	PVT3	Timp2	1.10686
Sh3kbp1	1.87931e-24	1.65945	0.891	0.807	6.29607e-20	PVT3	Sh3kbp1	1.10409
Nrg2	1.45619e-13	8.34507	0.797	0.722	4.87852e-09	PVT3	Nrg2	1.10388
Foxp2	3.85444e-110	64.7888	0.997	0.904	1.29131e-105	PVT3	Foxp2	1.10288
Large1	4.23852e-40	8.47413	0.912	0.829	1.41999e-35	PVT3	Large1	1.10012
Fam222b	7.48677e-08	1.81652	0.709	0.645	0.00250822	PVT3	Fam222b	1.09922
Lnpk	2.12667e-08	4.22534	0.757	0.691	0.000712477	PVT3	Lnpk	1.09551
Cntn4	3.01804e-59	101.308	0.998	0.911	1.0111e-54	PVT3	Cntn4	1.0955
Galnt17	1.03348e-36	6.16023	0.97	0.886	3.46235e-32	PVT3	Galnt17	1.09481
Tspoap11	9.08565e-07	1.48863	0.66	0.604	0.0304388	PVT3	Tspoap1	1.09272
Arhgap26	7.39343e-80	16.155	0.949	0.869	2.47695e-75	PVT3	Arhgap26	1.09206
Cst3	3.96045e-19	17.5618	0.833	0.763	1.32683e-14	PVT3	Cst3	1.09174
Chfr	3.48373e-07	1.31428	0.731	0.671	0.0116712	PVT3	Chfr	1.08942
Xpr1	1.16805e-14	5.45259	0.795	0.73	3.91319e-10	PVT3	Xpr1	1.08904
Ints61	8.38886e-08	1.72195	0.667	0.614	0.00281044	PVT3	Ints6	1.08632
C530008M17Rik	1.74905e-41	0.759288	0.963	0.887	5.85968e-37	PVT3	C530008M17Rik	1.08568
Phtf2	8.34864e-07	6.34851	0.623	0.575	0.0279696	PVT3	Phtf2	1.08348
Pakap1	7.22007e-09	2.61349	0.626	0.578	0.000241887	PVT3	Pakap	1.08304
Zbtb20	1.58734e-52	4.64566	0.968	0.894	5.3179e-48	PVT3	Zbtb20	1.08277
Bmpr2	8.98165e-09	1.31078	0.774	0.715	0.000300903	PVT3	Bmpr2	1.08252
Zeb1	1.79199e-32	3.19078	0.929	0.86	6.00352e-28	PVT3	Zeb1	1.08023
Wwc11	6.87667e-15	3.31159	0.839	0.777	2.30382e-10	PVT3	Wwc1	1.07979
Btbd7	1.14119e-07	3.59664	0.741	0.688	0.00382323	PVT3	Btbd7	1.07703
Ap2a21	1.49839e-08	1.60721	0.787	0.731	0.000501989	PVT3	Ap2a2	1.07661
Pced1b	5.9374e-07	0.539956	0.705	0.655	0.0198915	PVT3	Pced1b	1.07634
Grb10	1.55071e-26	27.0112	0.905	0.842	5.1952e-22	PVT3	Grb10	1.07482
Adam231	1.08527e-09	4.06536	0.9	0.838	3.63586e-05	PVT3	Adam23	1.07399
Erc11	1.45399e-06	3.19227	0.871	0.811	0.0487114	PVT3	Erc1	1.07398
Adcy9	6.11417e-07	8.58844	0.659	0.614	0.0204837	PVT3	Adcy9	1.07329
Slc2a13	1.2589e-73	170.557	0.961	0.897	4.21755e-69	PVT3	Slc2a13	1.07135
Olfm1	3.31965e-13	1.90319	0.925	0.864	1.11215e-08	PVT3	Olfm1	1.0706
Psd3	6.32607e-15	5.44913	0.882	0.827	2.11936e-10	PVT3	Psd3	1.06651
Ptprn	2.61334e-33	1.76354	0.937	0.879	8.7552e-29	PVT3	Ptprn	1.06598
Fars2	1.4692e-07	9.73892	0.811	0.765	0.00492212	PVT3	Fars2	1.06013
Dmxl1	7.83113e-40	18.0838	0.938	0.888	2.62358e-35	PVT3	Dmxl1	1.05631
Asap1	7.69074e-31	1.75573	0.948	0.899	2.57655e-26	PVT3	Asap1	1.05451
Zfand31	1.63297e-07	0.607099	0.787	0.747	0.00547078	PVT3	Zfand3	1.05355
Dennd1b	4.17393e-07	6.14011	0.873	0.831	0.0139835	PVT3	Dennd1b	1.05054
Ablim1	8.88194e-12	7.057	0.915	0.877	2.97563e-07	PVT3	Ablim1	1.04333
Ncald	1.50818e-27	33.6312	0.959	0.92	5.0527e-23	PVT3	Ncald	1.04239
Pde10a	5.62545e-09	193.641	0.935	0.897	0.000188464	PVT3	Pde10a	1.04236
Ankrd12	2.39183e-11	0.528963	0.911	0.875	8.01311e-07	PVT3	Ankrd12	1.04114
Peg3	4.29612e-13	7.53303	0.922	0.887	1.43929e-08	PVT3	Peg3	1.03946
Lrba	4.79433e-07	0.655259	0.847	0.816	0.016062	PVT3	Lrba	1.03799
Fchsd2	8.6885e-07	0.522582	0.903	0.875	0.0291082	PVT3	Fchsd2	1.032
Dclk1	4.1519e-77	29.173	0.987	0.957	1.39097e-72	PVT3	Dclk1	1.03135
Eml5	5.47631e-08	4.24016	0.883	0.857	0.00183467	PVT3	Eml5	1.03034
Ralgapa2	4.59202e-07	11.5005	0.815	0.802	0.0153842	PVT3	Ralgapa2	1.01621
Lncpint	1.05617e-07	63.7978	0.975	0.961	0.00353839	PVT3	Lncpint	1.01457
Dst	1.2261e-08	33.5015	0.98	0.968	0.000410768	PVT3	Dst	1.0124
Ralyl	1.07914e-32	271.546	0.999	0.991	3.61533e-28	PVT3	Ralyl	1.00807
Rimbp2	4.43854e-09	13.0805	0.887	0.894	0.0001487	PVT3	Rimbp2	0.99217
Cdh13	1.72388e-08	24.7363	0.79	0.811	0.000577534	PVT3	Cdh13	0.974106
Nrxn2	7.72044e-08	3.88679	0.818	0.866	0.0025865	PVT3	Nrxn2	0.944573
Arl3	2.685e-07	3.21345	0.678	0.722	0.00899529	PVT3	Arl3	0.939058
Chst9	1.30171e-07	3.33304	0.493	0.553	0.00436098	PVT3	Chst9	0.891501
Rps6ka3	8.4083e-13	18.4106	0.604	0.698	2.81695e-08	PVT3	Rps6ka3	0.86533
Rnf241	5.87362e-12	1.47641	0.339	0.445	1.96778e-07	PVT3	Rnf24	0.761798
Dusp16	1.76858e-08	1.09548	0.126	0.2	0.000592508	PVT3	Dusp16	0.63
Homer21	4.75676e-32	2.6619	0.242	0.422	1.59361e-27	PVT3	Homer2	0.57346
Snx311	4.98912e-23	0.959462	0.185	0.334	1.67146e-18	PVT3	Snx31	0.553892
Cd2471	2.8365e-52	2.83688	0.131	0.367	9.50284e-48	PVT3	Cd247	0.356948
Fmo1	2.62757e-151	1.15483	0.148	0.011	8.80287e-147	PVT4	Fmo1	13.4545
Gm9934	3.75211e-156	0.65217	0.162	0.013	1.25703e-151	PVT4	Gm9934	12.4615
Gm26862	2.43144e-112	0.832596	0.126	0.011	8.14582e-108	PVT4	Gm26862	11.4545
Bmper	0	8.42362	0.497	0.059	0	PVT4	Bmper	8.42373
Gm44618	2.48444e-77	4.75642	0.107	0.013	8.32336e-73	PVT4	Gm44618	8.23077
Hcrtr1	9.50432e-133	0.768942	0.197	0.026	3.18414e-128	PVT4	Hcrtr1	7.57692
Gpr83	2.49961e-122	1.14471	0.198	0.029	8.37418e-118	PVT4	Gpr83	6.82759
Npsr1	1.34614e-222	6.31152	0.344	0.051	4.50985e-218	PVT4	Npsr1	6.7451
Actn2	6.03908e-191	4.01367	0.315	0.047	2.02321e-186	PVT4	Actn2	6.70213
Adamts21	0	2.44045	0.561	0.106	0	PVT4	Adamts2	5.29245
Tead41	6.80495e-83	0.525807	0.193	0.039	2.27979e-78	PVT4	Tead4	4.94872
Kirrel	3.7407e-141	1.68577	0.328	0.07	1.25321e-136	PVT4	Kirrel	4.68571
Hpcal1	6.96251e-215	5.5546	0.472	0.103	2.33258e-210	PVT4	Hpcal1	4.58252
Tnfaip8l31	3.03183e-55	0.572731	0.142	0.032	1.01572e-50	PVT4	Tnfaip8l3	4.4375
Ntrk11	6.974e-69	0.669817	0.189	0.044	2.33643e-64	PVT4	Ntrk1	4.29545
Ccdc1871	1.65759e-135	1.71892	0.35	0.083	5.55326e-131	PVT4	Ccdc187	4.21687
Sema3a1	3.59779e-234	2.10366	0.547	0.134	1.20533e-229	PVT4	Sema3a	4.08209
Cemip1	2.01699e-188	1.40277	0.481	0.118	6.75731e-184	PVT4	Cemip	4.07627
Gm45680	1.50438e-45	0.851692	0.133	0.033	5.03998e-41	PVT4	Gm45680	4.0303
Gm43948	1.11318e-191	5.95505	0.524	0.14	3.72937e-187	PVT4	Gm43948	3.74286
Gda1	6.90367e-101	2.01783	0.318	0.086	2.31287e-96	PVT4	Gda	3.69767
Ryr1	1.72744e-48	0.585682	0.164	0.045	5.78727e-44	PVT4	Ryr1	3.64444
Parm1	7.05761e-295	14.9474	0.725	0.202	2.36444e-290	PVT4	Parm1	3.58911
Ankfn1	0	11.3265	0.782	0.218	0	PVT4	Ankfn1	3.58716
B020031H02Rik	2.0459e-43	5.42791	0.15	0.042	6.85418e-39	PVT4	B020031H02Rik	3.57143
Bcl11b1	0	2.16608	0.796	0.239	0	PVT4	Bcl11b	3.33054
Zbbx1	3.35615e-27	0.912445	0.106	0.032	1.12438e-22	PVT4	Zbbx	3.3125
Sema3f	1.85989e-71	0.722312	0.272	0.083	6.23099e-67	PVT4	Sema3f	3.27711
Baiap22	2.58284e-71	1.00951	0.276	0.086	8.65302e-67	PVT4	Baiap2	3.2093
Fam83b1	4.22077e-45	0.607625	0.192	0.062	1.41404e-40	PVT4	Fam83b	3.09677
Acot11	3.10736e-29	0.53612	0.133	0.044	1.04103e-24	PVT4	Acot11	3.02273
Slc29a41	2.99153e-42	0.708465	0.204	0.071	1.00222e-37	PVT4	Slc29a4	2.87324
Mmp171	1.68338e-42	0.770667	0.204	0.072	5.63965e-38	PVT4	Mmp17	2.83333
Itgb8	8.40855e-92	1.33355	0.403	0.148	2.81703e-87	PVT4	Itgb8	2.72297
9130015G15Rik1	1.63033e-45	0.610738	0.247	0.092	5.46194e-41	PVT4	9130015G15Rik	2.68478
Glra31	2.59672e-79	0.869812	0.402	0.151	8.69953e-75	PVT4	Glra3	2.66225
Col18a11	1.98757e-168	2.62959	0.653	0.247	6.65876e-164	PVT4	Col18a1	2.64372
Klf10	1.33813e-16	0.548517	0.101	0.04	4.48302e-12	PVT4	Klf10	2.525
Isyna1	3.13345e-36	0.574192	0.223	0.09	1.04977e-31	PVT4	Isyna1	2.47778
Gm200631	2.68123e-32	0.726548	0.205	0.083	8.98266e-28	PVT4	Gm20063	2.46988
Kcnj51	5.00728e-86	1.37606	0.469	0.191	1.67754e-81	PVT4	Kcnj5	2.4555
Susd1	3.69952e-68	2.99507	0.399	0.164	1.23941e-63	PVT4	Susd1	2.43293
Spata131	3.87323e-39	0.763655	0.255	0.105	1.29761e-34	PVT4	Spata13	2.42857
Stard13	8.69418e-41	2.08969	0.26	0.108	2.91272e-36	PVT4	Stard13	2.40741
Mylk	1.47536e-66	14.9333	0.421	0.178	4.94275e-62	PVT4	Mylk	2.36517
Baiap31	1.26203e-154	5.27915	0.71	0.302	4.22806e-150	PVT4	Baiap3	2.35099
Dpy19l1	1.25809e-96	9.87011	0.522	0.224	4.21487e-92	PVT4	Dpy19l1	2.33036
Megf61	4.41713e-39	0.544201	0.272	0.117	1.47983e-34	PVT4	Megf6	2.32479
Gnasas1	3.29314e-24	3.11821	0.188	0.083	1.10327e-19	PVT4	Gnasas1	2.26506
Gm498781	2.92171e-26	0.897121	0.204	0.091	9.78831e-22	PVT4	Gm49878	2.24176
Apobec4	6.5197e-37	0.696936	0.275	0.123	2.18423e-32	PVT4	Apobec4	2.23577
Gm197441	3.1185e-27	1.68734	0.219	0.099	1.04476e-22	PVT4	Gm19744	2.21212
Skap1	8.46663e-22	5.47564	0.172	0.078	2.83649e-17	PVT4	Skap1	2.20513
Zmiz1os11	5.33761e-18	0.547679	0.147	0.067	1.78821e-13	PVT4	Zmiz1os1	2.19403
Cpa6	9.42288e-53	10.2979	0.362	0.165	3.15685e-48	PVT4	Cpa6	2.19394
Cfap441	7.5925e-45	0.74899	0.336	0.154	2.54364e-40	PVT4	Cfap44	2.18182
Rab3b	1.45175e-118	8.68701	0.659	0.303	4.86367e-114	PVT4	Rab3b	2.17492
Zim11	2.36209e-24	0.533737	0.2	0.092	7.91346e-20	PVT4	Zim1	2.17391
Nbl1	2.0422e-59	1.44782	0.429	0.198	6.84178e-55	PVT4	Nbl1	2.16667
Gm12216	5.84003e-22	0.747327	0.188	0.087	1.95653e-17	PVT4	Gm12216	2.16092
Eda	6.48438e-91	18.3736	0.576	0.274	2.1724e-86	PVT4	Eda	2.10219
Dennd3	3.15399e-27	0.781896	0.245	0.117	1.05665e-22	PVT4	Dennd3	2.09402
Rspo11	1.49043e-35	0.844844	0.322	0.155	4.99325e-31	PVT4	Rspo1	2.07742
Dctd1	3.22125e-38	1.50166	0.336	0.163	1.07918e-33	PVT4	Dctd	2.06135
Efnb32	4.43475e-53	0.790806	0.428	0.208	1.48573e-48	PVT4	Efnb3	2.05769
Sytl21	9.11215e-86	1.62966	0.565	0.275	3.05275e-81	PVT4	Sytl2	2.05455
Gck1	6.28424e-64	0.966045	0.524	0.256	2.10535e-59	PVT4	Gck	2.04688
Kcnip2	2.25827e-42	1.37127	0.367	0.18	7.56565e-38	PVT4	Kcnip2	2.03889
Elk3	1.47541e-33	1.54312	0.307	0.152	4.94292e-29	PVT4	Elk3	2.01974
Oprk11	4.60664e-77	1.67792	0.596	0.296	1.54332e-72	PVT4	Oprk1	2.01351
Gprc5b1	3.86077e-35	0.686232	0.321	0.16	1.29344e-30	PVT4	Gprc5b	2.00625
Ankrd34b	4.57374e-35	0.539303	0.323	0.161	1.53229e-30	PVT4	Ankrd34b	2.00621
Coq8b1	3.35561e-31	0.612208	0.314	0.159	1.12419e-26	PVT4	Coq8b	1.97484
Junb1	2.06846e-15	1.96916	0.155	0.079	6.92976e-11	PVT4	Junb	1.96203
Gm498761	7.72785e-22	0.933072	0.233	0.121	2.58898e-17	PVT4	Gm49876	1.92562
Gm108481	6.96176e-61	1.56174	0.514	0.267	2.33233e-56	PVT4	Gm10848	1.92509
Fam20a	2.94469e-136	0.516602	0.779	0.408	9.86531e-132	PVT4	Fam20a	1.90931
Gm287561	4.30827e-26	0.610538	0.284	0.149	1.44336e-21	PVT4	Gm28756	1.90604
Cplx21	6.09975e-15	0.855985	0.178	0.094	2.04354e-10	PVT4	Cplx2	1.89362
Sulf2	7.82835e-19	5.25483	0.232	0.123	2.62265e-14	PVT4	Sulf2	1.88618
Gm160361	1.79589e-16	0.51702	0.197	0.105	6.01659e-12	PVT4	Gm16036	1.87619
St8sia61	2.43892e-21	1.53361	0.24	0.128	8.17087e-17	PVT4	St8sia6	1.875
Wscd2	5.60391e-76	1.70931	0.617	0.33	1.87742e-71	PVT4	Wscd2	1.8697
Cnih31	8.83404e-10	2.75476	0.126	0.068	2.95958e-05	PVT4	Cnih3	1.85294
Steap21	4.07303e-21	0.568861	0.249	0.135	1.36455e-16	PVT4	Steap2	1.84444
Peli2	1.02459e-28	0.826977	0.348	0.19	3.43258e-24	PVT4	Peli2	1.83158
Vwa5b11	4.39114e-83	3.24374	0.684	0.375	1.47112e-78	PVT4	Vwa5b1	1.824
Efnb21	3.70153e-21	0.506402	0.273	0.15	1.24009e-16	PVT4	Efnb2	1.82
Gm45341	1.24503e-47	6.52839	0.5	0.275	4.17112e-43	PVT4	Gm45341	1.81818
Ptpru	1.24383e-73	2.74151	0.632	0.35	4.16707e-69	PVT4	Ptpru	1.80571
Map3k141	3.53218e-31	1.16879	0.369	0.206	1.18335e-26	PVT4	Map3k14	1.79126
Syt101	2.44742e-77	1.64799	0.677	0.378	8.19936e-73	PVT4	Syt10	1.79101
6530403H02Rik1	1.30951e-14	2.38313	0.192	0.108	4.38713e-10	PVT4	6530403H02Rik	1.77778
Tpm4	1.43297e-13	0.52833	0.193	0.109	4.80074e-09	PVT4	Tpm4	1.77064
Vrk21	1.69795e-08	0.607426	0.118	0.067	0.000568848	PVT4	Vrk2	1.76119
Prex1	2.02448e-16	0.618715	0.235	0.134	6.78241e-12	PVT4	Prex1	1.75373
Fstl4	4.62756e-72	70.7864	0.674	0.39	1.55033e-67	PVT4	Fstl4	1.72821
Zdhhc231	3.47738e-26	0.613227	0.36	0.209	1.16499e-21	PVT4	Zdhhc23	1.72249
Plekho1	2.0576e-14	0.79372	0.213	0.124	6.89337e-10	PVT4	Plekho1	1.71774
Rasal11	5.98863e-39	1.78437	0.477	0.278	2.00631e-34	PVT4	Rasal1	1.71583
Cntnap5b	0	37.0255	0.971	0.566	0	PVT4	Cntnap5b	1.71555
Gm129301	3.90578e-19	0.665197	0.293	0.171	1.30852e-14	PVT4	Gm12930	1.71345
Elovl51	2.27791e-53	4.54914	0.564	0.331	7.63145e-49	PVT4	Elovl5	1.70393
Pde6h	5.85944e-07	0.63401	0.11	0.065	0.0196303	PVT4	Pde6h	1.69231
Gm28307	1.41972e-14	0.763304	0.228	0.135	4.75635e-10	PVT4	Gm28307	1.68889
1941-03-01	5.95869e-37	1.97356	0.485	0.291	1.99628e-32	PVT4	2023-03-04	1.66667
Gzmk	6.14707e-07	0.574967	0.125	0.076	0.0205939	PVT4	Gzmk	1.64474
Cdon	3.00581e-26	1.18494	0.406	0.247	1.00701e-21	PVT4	Cdon	1.64372
Rgl1	4.82218e-90	1.97848	0.712	0.434	1.61553e-85	PVT4	Rgl1	1.64055
Ubash3b1	1.08156e-07	3.42565	0.136	0.083	0.00362343	PVT4	Ubash3b	1.63855
1700016P03Rik1	2.86443e-11	0.555599	0.192	0.118	9.59641e-07	PVT4	1700016P03Rik	1.62712
Gramd1c	6.94388e-15	0.729028	0.269	0.166	2.32634e-10	PVT4	Gramd1c	1.62048
D130058E05Rik	1.12609e-11	5.47303	0.218	0.135	3.77262e-07	PVT4	D130058E05Rik	1.61481
Ccdc88c	6.26877e-21	0.928539	0.36	0.223	2.10016e-16	PVT4	Ccdc88c	1.61435
Lrriq1	2.28029e-10	1.28285	0.195	0.121	7.63941e-06	PVT4	Lrriq1	1.61157
Grk4	2.70096e-11	1.08322	0.218	0.136	9.04875e-07	PVT4	Grk4	1.60294
Rab36	5.07574e-23	0.54025	0.39	0.244	1.70047e-18	PVT4	Rab36	1.59836
1700016K05Rik1	5.71785e-14	0.653895	0.272	0.172	1.9156e-09	PVT4	1700016K05Rik	1.5814
Ciart	1.83632e-09	1.68851	0.185	0.117	6.15203e-05	PVT4	Ciart	1.5812
Gm336961	1.5047e-12	1.48471	0.254	0.162	5.04106e-08	PVT4	Gm33696	1.5679
Pak6	2.7776e-25	1.27421	0.478	0.307	9.30551e-21	PVT4	Pak6	1.557
Gm130521	6.23032e-37	1.53656	0.563	0.364	2.08728e-32	PVT4	Gm13052	1.5467
Mettl91	5.5635e-16	0.694315	0.329	0.213	1.86388e-11	PVT4	Mettl9	1.5446
A230077H06Rik	9.87256e-11	0.564974	0.237	0.154	3.3075e-06	PVT4	A230077H06Rik	1.53896
2900060N12Rik1	2.84656e-10	0.55881	0.224	0.146	9.53656e-06	PVT4	2900060N12Rik	1.53425
Ptbp3	5.95916e-23	0.85432	0.428	0.281	1.99644e-18	PVT4	Ptbp3	1.52313
Fyb2	3.63389e-10	1.68221	0.239	0.157	1.21742e-05	PVT4	Fyb2	1.52229
B3galt51	4.67506e-14	0.74105	0.312	0.205	1.56624e-09	PVT4	B3galt5	1.52195
Kctd61	3.73681e-21	0.539893	0.424	0.279	1.25191e-16	PVT4	Kctd6	1.51971
Numbl1	7.28727e-14	0.506149	0.308	0.203	2.44138e-09	PVT4	Numbl	1.51724
Bean1	3.72028e-11	0.733779	0.259	0.171	1.24637e-06	PVT4	Bean1	1.51462
Fos	1.5082e-09	15.7497	0.216	0.143	5.05276e-05	PVT4	Fos	1.51049
Iqgap2	9.27584e-10	0.588479	0.225	0.149	3.10759e-05	PVT4	Iqgap2	1.51007
Mest	6.39171e-39	39.4856	0.58	0.386	2.14135e-34	PVT4	Mest	1.50259
Sik1	4.52524e-15	3.56819	0.329	0.219	1.51605e-10	PVT4	Sik1	1.50228
Zfp5361	7.63781e-73	5.74144	0.834	0.557	2.55882e-68	PVT4	Zfp536	1.49731
Gm270081	1.29842e-27	1.0734	0.526	0.352	4.34997e-23	PVT4	Gm27008	1.49432
Csmd2os1	1.23756e-10	0.818859	0.258	0.173	4.14609e-06	PVT4	Csmd2os	1.49133
Ccnyl1	9.0604e-15	0.713287	0.343	0.231	3.03542e-10	PVT4	Ccnyl1	1.48485
Gm14410	2.76915e-18	0.722493	0.393	0.265	9.27722e-14	PVT4	Gm14410	1.48302
Gm15584	2.63004e-19	2.73437	0.437	0.296	8.81117e-15	PVT4	Gm15584	1.47635
Elmsan1	7.21932e-14	1.81166	0.321	0.218	2.41862e-09	PVT4	Elmsan1	1.47248
Cfap541	1.63414e-31	4.35064	0.577	0.395	5.47471e-27	PVT4	Cfap54	1.46076
Skil	3.14764e-12	2.7336	0.308	0.211	1.05452e-07	PVT4	Skil	1.45972
Slc16a112	2.54476e-16	0.774375	0.382	0.262	8.52545e-12	PVT4	Slc16a11	1.45802
Mettl241	1.13554e-06	0.867345	0.185	0.127	0.0380428	PVT4	Mettl24	1.45669
Dclk32	4.00479e-15	0.727453	0.41	0.284	1.34168e-10	PVT4	Dclk3	1.44366
Zdbf21	2.43352e-55	0.541516	0.747	0.518	8.15279e-51	PVT4	Zdbf2	1.44208
Spint2	1.13008e-10	0.632277	0.302	0.21	3.786e-06	PVT4	Spint2	1.4381
Vps37c	2.29791e-13	0.604292	0.336	0.234	7.69845e-09	PVT4	Vps37c	1.4359
Dok5	3.36077e-17	1.95592	0.429	0.3	1.12592e-12	PVT4	Dok5	1.43
Gm11099	1.15049e-34	9.72079	0.667	0.468	3.85437e-30	PVT4	Gm11099	1.42521
Gm122391	1.55324e-25	4.63692	0.587	0.413	5.20368e-21	PVT4	Gm12239	1.42131
Kazn1	1.36548e-22	0.692832	0.509	0.36	4.57462e-18	PVT4	Kazn	1.41389
Plxna4os3	1.32303e-08	0.82968	0.27	0.191	0.000443242	PVT4	Plxna4os3	1.41361
Atp7a	2.58728e-16	5.10469	0.42	0.298	8.66789e-12	PVT4	Atp7a	1.4094
Car81	8.87932e-10	1.0784	0.294	0.209	2.97475e-05	PVT4	Car8	1.4067
Hdac71	3.59666e-21	1.89822	0.538	0.383	1.20495e-16	PVT4	Hdac7	1.4047
Gm47661	1.69086e-12	12.0603	0.334	0.238	5.66473e-08	PVT4	Gm47661	1.40336
Sncaip	3.09652e-60	8.68961	0.766	0.547	1.03739e-55	PVT4	Sncaip	1.40037
Pkig1	5.25745e-17	0.504601	0.509	0.364	1.76135e-12	PVT4	Pkig	1.39835
Smc2	4.16935e-15	1.41896	0.409	0.294	1.39681e-10	PVT4	Smc2	1.39116
Cyp7b11	5.33114e-18	3.79111	0.484	0.348	1.78604e-13	PVT4	Cyp7b1	1.3908
Pnma31	1.39521e-12	0.880641	0.381	0.274	4.67423e-08	PVT4	Pnma3	1.39051
E430024P14Rik1	6.26781e-09	0.878124	0.304	0.219	0.000209984	PVT4	E430024P14Rik	1.38813
B3gnt2	2.00953e-15	2.79364	0.443	0.321	6.73234e-11	PVT4	B3gnt2	1.38006
Pnck	2.20024e-11	0.562842	0.383	0.278	7.37123e-07	PVT4	Pnck	1.3777
Pdxk	1.35605e-10	0.611346	0.347	0.252	4.54302e-06	PVT4	Pdxk	1.37698
A730060N03Rik	6.24556e-11	1.62805	0.348	0.253	2.09239e-06	PVT4	A730060N03Rik	1.37549
Izumo41	8.76e-16	0.539961	0.459	0.334	2.93478e-11	PVT4	Izumo4	1.37425
Id41	9.30862e-25	0.883007	0.599	0.437	3.11858e-20	PVT4	Id4	1.37071
Fbn1	7.70864e-10	1.61328	0.355	0.259	2.58255e-05	PVT4	Fbn1	1.37066
Ralgds1	6.3334e-12	0.989402	0.407	0.297	2.12182e-07	PVT4	Ralgds	1.37037
Kcnk10	2.47755e-64	4.74581	0.789	0.576	8.30028e-60	PVT4	Kcnk10	1.36979
Blcap	5.97998e-12	0.556352	0.389	0.284	2.00341e-07	PVT4	Blcap	1.36972
4933400F21Rik	1.08309e-06	2.47762	0.252	0.184	0.0362856	PVT4	4933400F21Rik	1.36957
2610035D17Rik	5.82188e-17	1.81152	0.493	0.36	1.95045e-12	PVT4	2610035D17Rik	1.36944
Cradd	1.20944e-11	3.6069	0.382	0.279	4.05188e-07	PVT4	Cradd	1.36918
Lrrc19	2.01704e-07	0.702078	0.287	0.21	0.0067575	PVT4	Lrrc19	1.36667
Fbl1	2.38195e-09	0.771668	0.291	0.213	7.98002e-05	PVT4	Fbl	1.3662
Fmnl1	1.06734e-06	0.566293	0.235	0.173	0.035758	PVT4	Fmnl1	1.35838
Cdk191	2.83046e-16	1.78569	0.509	0.375	9.4826e-12	PVT4	Cdk19	1.35733
Sh3gl3	8.34945e-13	0.72846	0.42	0.31	2.79723e-08	PVT4	Sh3gl3	1.35484
Tiparp1	3.25454e-16	1.94798	0.467	0.345	1.09033e-11	PVT4	Tiparp	1.35362
Stxbp3	5.08997e-07	0.88555	0.266	0.197	0.0170524	PVT4	Stxbp3	1.35025
Gm207211	3.30304e-19	2.099	0.498	0.369	1.10659e-14	PVT4	Gm20721	1.34959
Per3	7.03243e-09	0.652503	0.357	0.265	0.000235601	PVT4	Per3	1.34717
Sorl11	7.78187e-55	1.9287	0.796	0.592	2.60708e-50	PVT4	Sorl1	1.34459
Sh3bp51	3.35798e-11	0.588781	0.437	0.327	1.12499e-06	PVT4	Sh3bp5	1.33639
Celf61	1.58736e-15	0.562843	0.485	0.363	5.31798e-11	PVT4	Celf6	1.33609
Lman2l1	8.23486e-18	0.809624	0.544	0.408	2.75884e-13	PVT4	Lman2l	1.33333
Nucb2	1.40753e-06	0.543574	0.261	0.196	0.047155	PVT4	Nucb2	1.33163
Pygb	1.47861e-20	1.4085	0.589	0.445	4.95364e-16	PVT4	Pygb	1.3236
Slc37a11	2.01184e-08	1.28533	0.344	0.26	0.000674008	PVT4	Slc37a1	1.32308
Ap1s3	1.90534e-07	0.795034	0.312	0.236	0.00638328	PVT4	Ap1s3	1.32203
1110019D14Rik	9.10117e-07	1.93679	0.295	0.224	0.0304907	PVT4	1110019D14Rik	1.31696
Radil1	4.95119e-22	4.21067	0.615	0.467	1.65875e-17	PVT4	Radil	1.31692
Ttc261	5.9501e-10	0.800186	0.388	0.295	1.9934e-05	PVT4	Ttc26	1.31525
Rhou1	4.37792e-10	4.42077	0.422	0.321	1.46669e-05	PVT4	Rhou	1.31464
Ctdspl1	2.92966e-17	0.618004	0.598	0.457	9.81496e-13	PVT4	Ctdspl	1.30853
Wdr61	1.7049e-12	0.930667	0.469	0.359	5.71177e-08	PVT4	Wdr6	1.30641
Pik3cb1	2.48533e-30	4.05734	0.724	0.555	8.32634e-26	PVT4	Pik3cb	1.3045
Zc3h12c1	2.68753e-29	2.12212	0.733	0.562	9.00376e-25	PVT4	Zc3h12c	1.30427
Rgs20	5.95384e-22	16.3798	0.606	0.465	1.99466e-17	PVT4	Rgs20	1.30323
Zcchc12	1.57599e-13	1.03105	0.5	0.385	5.27989e-09	PVT4	Zcchc12	1.2987
Tsc22d4	1.32323e-08	3.25151	0.379	0.292	0.000443307	PVT4	Tsc22d4	1.29795
Capzb	5.23258e-16	1.29844	0.576	0.444	1.75302e-11	PVT4	Capzb	1.2973
Ivns1abp1	1.90593e-12	2.01454	0.467	0.362	6.38525e-08	PVT4	Ivns1abp	1.29006
Anxa71	1.56268e-08	0.62874	0.414	0.321	0.000523529	PVT4	Anxa7	1.28972
Rab27a	1.6323e-08	0.529942	0.415	0.323	0.000546855	PVT4	Rab27a	1.28483
Zcchc17	4.83524e-11	0.556307	0.47	0.366	1.6199e-06	PVT4	Zcchc17	1.28415
Tmed8	2.87388e-07	0.550721	0.326	0.254	0.00962807	PVT4	Tmed8	1.28346
Gpr451	2.8554e-24	1.91391	0.666	0.519	9.56615e-20	PVT4	Gpr45	1.28324
Trerf1	7.8709e-29	6.41712	0.635	0.496	2.63691e-24	PVT4	Trerf1	1.28024
Pitpnm21	2.83733e-21	2.74882	0.674	0.528	9.50563e-17	PVT4	Pitpnm2	1.27652
Cdkl21	3.52766e-09	0.765335	0.431	0.338	0.000118184	PVT4	Cdkl2	1.27515
Fam131a	5.87035e-09	2.01913	0.462	0.363	0.000196668	PVT4	Fam131a	1.27273
Gstz1	4.76114e-11	0.931682	0.47	0.371	1.59508e-06	PVT4	Gstz1	1.26685
Slc39a111	1.71789e-08	0.892653	0.455	0.36	0.000575529	PVT4	Slc39a11	1.26389
Myo1d	1.64498e-08	0.959248	0.473	0.376	0.0005511	PVT4	Myo1d	1.25798
Nsun72	1.95141e-11	1.97751	0.566	0.45	6.5376e-07	PVT4	Nsun7	1.25778
Catspere21	4.17129e-16	6.30822	0.649	0.518	1.39746e-11	PVT4	Catspere2	1.2529
Fra10ac1	1.59773e-07	0.702665	0.397	0.317	0.0053527	PVT4	Fra10ac1	1.25237
Trpc5	2.2029e-27	10.6401	0.845	0.675	7.38015e-23	PVT4	Trpc5	1.25185
Zdhhc9	8.98287e-07	0.979074	0.375	0.3	0.0300944	PVT4	Zdhhc9	1.25
Cdk17	8.65022e-47	6.81707	0.79	0.632	2.898e-42	PVT4	Cdk17	1.25
Zmiz11	1.06067e-06	0.920983	0.371	0.297	0.0355347	PVT4	Zmiz1	1.24916
Pou2f2	4.68866e-08	3.27274	0.421	0.338	0.00157079	PVT4	Pou2f2	1.24556
Fndc3a1	5.54257e-70	3.21912	0.883	0.709	1.85687e-65	PVT4	Fndc3a	1.24542
Glra21	1.17e-07	1.03801	0.466	0.375	0.00391973	PVT4	Glra2	1.24267
Fbxo101	2.18673e-15	3.88695	0.62	0.5	7.32597e-11	PVT4	Fbxo10	1.24
Cenpp1	7.35651e-08	0.907479	0.443	0.358	0.00246458	PVT4	Cenpp	1.23743
Kif21b	1.44868e-08	0.659956	0.478	0.387	0.000485338	PVT4	Kif21b	1.23514
Firre	2.05461e-08	1.01649	0.466	0.378	0.000688335	PVT4	Firre	1.2328
Dhcr24	5.47579e-08	1.84472	0.477	0.387	0.0018345	PVT4	Dhcr24	1.23256
Camk2g1	1.53019e-09	0.55575	0.502	0.408	5.12646e-05	PVT4	Camk2g	1.23039
Rims4	1.50878e-09	0.60409	0.462	0.377	5.05472e-05	PVT4	Rims4	1.22546
Tmem911	1.23331e-11	1.40922	0.62	0.506	4.13183e-07	PVT4	Tmem91	1.2253
Nxpe31	1.16561e-06	0.756706	0.408	0.333	0.0390503	PVT4	Nxpe3	1.22523
Gnaz1	2.82605e-09	1.62285	0.526	0.43	9.46782e-05	PVT4	Gnaz	1.22326
Vstm2a1	1.41092e-06	2.81084	0.429	0.351	0.0472688	PVT4	Vstm2a	1.22222
Gm5577	1.91626e-10	2.57395	0.521	0.427	6.41986e-06	PVT4	Gm5577	1.22014
Pcsk7	2.80269e-09	2.55647	0.558	0.458	9.38958e-05	PVT4	Pcsk7	1.21834
Gm456451	1.11856e-06	0.78599	0.436	0.358	0.0374738	PVT4	Gm45645	1.21788
Rab27b	6.12581e-13	4.41267	0.625	0.516	2.05227e-08	PVT4	Rab27b	1.21124
Zkscan16	1.89476e-11	5.28418	0.563	0.465	6.34783e-07	PVT4	Zkscan16	1.21075
Fam81a1	7.91496e-07	1.30866	0.473	0.391	0.0265167	PVT4	Fam81a	1.20972
Gm10431	1.15793e-10	4.19572	0.633	0.525	3.87929e-06	PVT4	Gm1043	1.20571
Fam214a	9.94338e-10	6.38304	0.564	0.469	3.33123e-05	PVT4	Fam214a	1.20256
Gm268541	4.02346e-09	2.78144	0.576	0.48	0.000134794	PVT4	Gm26854	1.2
4732471J01Rik	4.26939e-28	1.64244	0.775	0.649	1.43033e-23	PVT4	4732471J01Rik	1.19414
Nyap2	5.07128e-70	3.23955	0.927	0.778	1.69898e-65	PVT4	Nyap2	1.19152
Ptprf1	5.65151e-09	2.20726	0.655	0.554	0.000189337	PVT4	Ptprf	1.18231
Unc13b1	5.80304e-30	0.789746	0.826	0.699	1.94413e-25	PVT4	Unc13b	1.18169
Grik1	9.98793e-38	58.238	0.836	0.708	3.34616e-33	PVT4	Grik1	1.18079
Gramd1b2	1.95255e-45	1.00238	0.809	0.686	6.54144e-41	PVT4	Gramd1b	1.1793
2210408F21Rik1	4.55601e-07	3.16409	0.612	0.52	0.0152635	PVT4	2210408F21Rik	1.17692
Cd200	1.94116e-08	1.0622	0.577	0.491	0.000650327	PVT4	Cd200	1.17515
Pcsk1n1	2.2329e-63	2.65977	0.896	0.764	7.48067e-59	PVT4	Pcsk1n	1.17277
D030068K23Rik1	7.01085e-07	1.9558	0.924	0.789	0.0234878	PVT4	D030068K23Rik	1.1711
Add21	1.90727e-30	2.37689	0.808	0.69	6.38972e-26	PVT4	Add2	1.17101
Ttll11	2.53695e-34	9.76943	0.837	0.718	8.49929e-30	PVT4	Ttll11	1.16574
Lhx91	1.4251e-16	2.75092	0.767	0.66	4.77436e-12	PVT4	Lhx9	1.16212
Pds5b1	2.18348e-31	4.9249	0.807	0.695	7.31509e-27	PVT4	Pds5b	1.16115
Matk	1.22103e-07	1.30454	0.603	0.521	0.0040907	PVT4	Matk	1.15739
Klhl33	1.13934e-06	0.898402	0.594	0.514	0.0381703	PVT4	Klhl3	1.15564
Celf5	4.41117e-07	1.67161	0.699	0.605	0.0147783	PVT4	Celf5	1.15537
Trim461	1.11423e-09	3.5157	0.632	0.548	3.7329e-05	PVT4	Trim46	1.15328
Ero1lb	3.63588e-10	5.76454	0.659	0.572	1.21809e-05	PVT4	Ero1lb	1.1521
Hmgcs1	4.46227e-08	7.91663	0.667	0.581	0.00149495	PVT4	Hmgcs1	1.14802
Hacd3	2.4258e-10	1.39992	0.67	0.584	8.12691e-06	PVT4	Hacd3	1.14726
Gm17276	5.0286e-09	1.78245	0.656	0.572	0.000168468	PVT4	Gm17276	1.14685
Efr3b1	1.11441e-22	1.92509	0.861	0.752	3.73351e-18	PVT4	Efr3b	1.14495
5330417C22Rik1	1.07809e-26	0.541718	0.829	0.727	3.61181e-22	PVT4	5330417C22Rik	1.1403
Gm157381	1.41886e-09	3.21009	0.791	0.694	4.75345e-05	PVT4	Gm15738	1.13977
Hmgcr	1.41736e-19	11.5506	0.857	0.752	4.74846e-15	PVT4	Hmgcr	1.13963
Clybl	2.96949e-12	2.59396	0.763	0.678	9.94839e-08	PVT4	Clybl	1.12537
Comt1	5.20614e-07	2.14283	0.624	0.556	0.0174416	PVT4	Comt	1.1223
Chd31	1.41675e-09	1.65151	0.716	0.639	4.74639e-05	PVT4	Chd3	1.1205
Rundc3b2	5.8394e-08	1.3739	0.706	0.631	0.00195632	PVT4	Rundc3b	1.11886
Sphkap	1.90694e-10	7.74386	0.868	0.776	6.38864e-06	PVT4	Sphkap	1.11856
Tmcc31	5.29014e-28	1.97326	0.976	0.874	1.7723e-23	PVT4	Tmcc3	1.1167
Wsb11	5.80562e-10	2.52476	0.719	0.646	1.945e-05	PVT4	Wsb1	1.113
Nav11	6.26879e-13	3.341	0.914	0.823	2.10017e-08	PVT4	Nav1	1.11057
Trim35	9.99745e-08	8.15053	0.744	0.674	0.00334935	PVT4	Trim35	1.10386
Arl15	2.48339e-56	47.6213	0.979	0.896	8.31987e-52	PVT4	Arl15	1.09263
Uhrf2	8.06885e-08	6.84954	0.713	0.655	0.00270323	PVT4	Uhrf2	1.08855
Nrd1	1.10795e-09	9.70351	0.839	0.778	3.71186e-05	PVT4	Nrd1	1.07841
Hnrnpa2b11	1.52529e-08	0.540367	0.888	0.824	0.000511004	PVT4	Hnrnpa2b1	1.07767
Odf22	1.09137e-09	1.77306	0.823	0.765	3.65632e-05	PVT4	Odf2	1.07582
Olfm12	7.4731e-16	2.0044	0.925	0.865	2.50364e-11	PVT4	Olfm1	1.06936
Ntrk2	3.27937e-35	20.7084	0.973	0.915	1.09866e-30	PVT4	Ntrk2	1.06339
Abr	8.71239e-07	6.2882	0.899	0.846	0.0291882	PVT4	Abr	1.06265
Astn21	1.81791e-66	1.91283	0.988	0.938	6.09038e-62	PVT4	Astn2	1.0533
Kdm7a2	8.94517e-07	0.7669	0.446	0.515	0.0299681	PVT4	Kdm7a	0.866019
Sntg21	8.3834e-10	0.507807	0.417	0.529	2.80861e-05	PVT4	Sntg2	0.78828
Serpinb7	7.71664e-123	0.55766	0.155	0.014	2.58523e-118	PVT5	Serpinb7	11.0714
1700047F07Rik	4.11503e-299	3.62424	0.436	0.05	1.37862e-294	PVT5	1700047F07Rik	8.72
Spp1	1.46664e-77	1.92156	0.163	0.026	4.91355e-73	PVT5	Spp1	6.26923
Gm19619	9.29622e-80	0.744401	0.172	0.028	3.11442e-75	PVT5	Gm19619	6.14286
Gm13561	2.90543e-111	5.88298	0.294	0.059	9.73376e-107	PVT5	Gm13561	4.98305
Klhl14	1.38442e-58	1.43478	0.161	0.033	4.63808e-54	PVT5	Klhl14	4.87879
Kynu	3.08526e-53	4.22578	0.181	0.044	1.03362e-48	PVT5	Kynu	4.11364
Sox131	3.90997e-71	0.964572	0.257	0.066	1.30992e-66	PVT5	Sox13	3.89394
Dpp4	1.72363e-60	1.32552	0.245	0.068	5.77451e-56	PVT5	Dpp4	3.60294
Slc22a3	2.85049e-79	1.4971	0.319	0.09	9.54972e-75	PVT5	Slc22a3	3.54444
Drd31	1.37297e-162	3.97584	0.594	0.174	4.59973e-158	PVT5	Drd3	3.41379
Cobll11	7.08985e-79	0.988727	0.333	0.1	2.37524e-74	PVT5	Cobll1	3.33
Slc38a11	4.34085e-42	1.0074	0.239	0.082	1.45427e-37	PVT5	Slc38a11	2.91463
Rxrg	5.8787e-29	0.548649	0.173	0.061	1.96948e-24	PVT5	Rxrg	2.83607
Palld	1.17794e-51	0.887628	0.293	0.104	3.94634e-47	PVT5	Palld	2.81731
Stard5	4.15546e-31	0.547791	0.2	0.073	1.39216e-26	PVT5	Stard5	2.73973
Gda2	3.55842e-38	0.529305	0.255	0.096	1.19214e-33	PVT5	Gda	2.65625
Gsg1l1	2.46734e-76	4.12923	0.452	0.171	8.26609e-72	PVT5	Gsg1l	2.64327
Bcl6	4.76556e-45	1.18794	0.297	0.113	1.59656e-40	PVT5	Bcl6	2.62832
Rnd3	2.10687e-26	0.888851	0.196	0.077	7.05844e-22	PVT5	Rnd3	2.54545
Epb41l21	7.69105e-56	0.995112	0.407	0.17	2.57665e-51	PVT5	Epb41l2	2.39412
Lama2	9.90217e-16	1.00767	0.14	0.062	3.31742e-11	PVT5	Lama2	2.25806
Cyyr1	5.72614e-91	10.9989	0.621	0.281	1.91837e-86	PVT5	Cyyr1	2.20996
Nppc	3.04971e-25	0.548964	0.249	0.114	1.02171e-20	PVT5	Nppc	2.18421
Lyzl41	4.45225e-11	0.852389	0.109	0.05	1.49159e-06	PVT5	Lyzl4	2.18
Gm9731	3.32179e-20	0.964194	0.209	0.098	1.11287e-15	PVT5	Gm973	2.13265
Megf11	2.37433e-37	0.90838	0.357	0.17	7.95447e-33	PVT5	Megf11	2.1
Dnah5	2.35109e-11	0.757411	0.125	0.06	7.87661e-07	PVT5	Dnah5	2.08333
Vegfc1	3.14193e-25	2.12033	0.273	0.134	1.05261e-20	PVT5	Vegfc	2.03731
Tmem132e	4.47577e-28	0.791026	0.327	0.161	1.49947e-23	PVT5	Tmem132e	2.03106
Svil1	7.13725e-37	1.64085	0.403	0.203	2.39112e-32	PVT5	Svil	1.98522
Gal	8.3465e-10	3.24958	0.127	0.064	2.79624e-05	PVT5	Gal	1.98438
Glra22	7.05439e-83	1.25493	0.707	0.36	2.36336e-78	PVT5	Glra2	1.96389
Gpr1561	2.3339e-20	0.7596	0.273	0.141	7.81904e-16	PVT5	Gpr156	1.93617
Cerkl1	1.21311e-10	1.08687	0.154	0.081	4.06416e-06	PVT5	Cerkl	1.90123
Mtus1	4.84178e-24	2.96245	0.343	0.185	1.62209e-19	PVT5	Mtus1	1.85405
Lbh	1.85756e-18	2.97995	0.273	0.148	6.22318e-14	PVT5	Lbh	1.84459
Gdpd2	3.84584e-22	0.650441	0.328	0.18	1.28843e-17	PVT5	Gdpd2	1.82222
Onecut21	5.86375e-14	0.697586	0.236	0.131	1.96447e-09	PVT5	Onecut2	1.80153
B430010I23Rik	3.9957e-15	0.66644	0.252	0.14	1.33864e-10	PVT5	B430010I23Rik	1.8
Lemd12	1.19541e-46	2.5708	0.576	0.322	4.00488e-42	PVT5	Lemd1	1.78882
Lypd6b	1.37413e-27	6.90683	0.413	0.234	4.6036e-23	PVT5	Lypd6b	1.76496
Myo1e2	3.00892e-29	0.73201	0.428	0.243	1.00805e-24	PVT5	Myo1e	1.76132
Jph12	6.18292e-33	0.832823	0.506	0.295	2.0714e-28	PVT5	Jph1	1.71525
Ppp1r14c	1.6729e-40	1.43138	0.545	0.319	5.60456e-36	PVT5	Ppp1r14c	1.70846
Zhx2	6.06492e-19	1.77443	0.351	0.211	2.03187e-14	PVT5	Zhx2	1.66351
Rftn1	5.89519e-49	3.63336	0.658	0.397	1.97501e-44	PVT5	Rftn1	1.65743
Cox6a2	4.6289e-16	0.688117	0.321	0.197	1.55077e-11	PVT5	Cox6a2	1.62944
Prrg41	1.07691e-15	0.673131	0.342	0.213	3.60785e-11	PVT5	Prrg4	1.60563
Ptger31	6.62047e-14	0.55039	0.325	0.203	2.21799e-09	PVT5	Ptger3	1.60099
Ninl	2.96347e-11	0.548496	0.266	0.167	9.92823e-07	PVT5	Ninl	1.59281
Frmd61	9.93177e-24	1.11384	0.494	0.312	3.32734e-19	PVT5	Frmd6	1.58333
Fam196b	1.21827e-08	5.98493	0.199	0.126	0.000408144	PVT5	Fam196b	1.57937
Gm120271	6.05541e-33	1.97053	0.607	0.385	2.02868e-28	PVT5	Gm12027	1.57662
Hsd17b71	1.40755e-15	0.518101	0.373	0.237	4.71559e-11	PVT5	Hsd17b7	1.57384
Gm10115	3.03327e-08	0.62008	0.212	0.135	0.00101621	PVT5	Gm10115	1.57037
Prex11	1.44901e-08	0.760858	0.215	0.137	0.000485447	PVT5	Prex1	1.56934
Mboat11	2.24353e-13	1.94911	0.342	0.219	7.51628e-09	PVT5	Mboat1	1.56164
Filip1	1.20933e-29	0.6802	0.596	0.384	4.05148e-25	PVT5	Filip1	1.55208
Sh3rf31	5.01626e-48	3.46541	0.73	0.471	1.68055e-43	PVT5	Sh3rf3	1.54989
Cgn	2.03031e-11	0.569604	0.287	0.186	6.80196e-07	PVT5	Cgn	1.54301
Rin21	4.85562e-11	1.31453	0.285	0.185	1.62673e-06	PVT5	Rin2	1.54054
Ptchd4	3.29056e-60	40.5567	0.787	0.511	1.1024e-55	PVT5	Ptchd4	1.54012
Shox21	1.40704e-31	2.31771	0.59	0.384	4.71388e-27	PVT5	Shox2	1.53646
Scml41	8.97981e-21	2.92156	0.496	0.323	3.00842e-16	PVT5	Scml4	1.5356
Appl22	1.58953e-18	0.767669	0.431	0.281	5.32524e-14	PVT5	Appl2	1.53381
Chrm2	9.85695e-29	12.2638	0.567	0.375	3.30228e-24	PVT5	Chrm2	1.512
Cdh71	1.11575e-87	3.14746	0.878	0.585	3.73799e-83	PVT5	Cdh7	1.50085
Gpld13	8.65728e-20	0.697736	0.473	0.316	2.90036e-15	PVT5	Gpld1	1.49684
Pamr12	6.2452e-18	0.677196	0.472	0.317	2.09227e-13	PVT5	Pamr1	1.48896
Tshz31	2.98488e-23	6.58577	0.554	0.374	9.99994e-19	PVT5	Tshz3	1.48128
Sh3pxd2a2	9.56881e-28	0.957215	0.613	0.414	3.20574e-23	PVT5	Sh3pxd2a	1.48068
Znrf2	2.9285e-10	1.93836	0.316	0.214	9.81106e-06	PVT5	Znrf2	1.47664
Tmtc1	2.93632e-77	7.6675	0.858	0.583	9.83725e-73	PVT5	Tmtc1	1.4717
Ass1	7.80888e-09	0.585237	0.275	0.187	0.000261613	PVT5	Ass1	1.47059
Smc21	6.55793e-14	0.777596	0.433	0.295	2.19704e-09	PVT5	Smc2	1.4678
Tom1l11	1.00483e-12	0.772041	0.358	0.244	3.36637e-08	PVT5	Tom1l1	1.46721
Mfap3l1	1.65147e-22	0.586874	0.546	0.373	5.53275e-18	PVT5	Mfap3l	1.46381
Medag1	1.50067e-10	0.698001	0.313	0.215	5.02753e-06	PVT5	Medag	1.45581
Chst91	2.2589e-37	1.73934	0.773	0.531	7.56776e-33	PVT5	Chst9	1.45574
Creg11	1.76286e-22	1.58813	0.537	0.369	5.90592e-18	PVT5	Creg1	1.45528
Pnpla7	8.82815e-07	1.18038	0.231	0.159	0.0295761	PVT5	Pnpla7	1.45283
Trpc71	5.61504e-23	3.55022	0.585	0.403	1.88115e-18	PVT5	Trpc7	1.45161
Akap7	1.34085e-19	0.923847	0.524	0.363	4.49211e-15	PVT5	Akap7	1.44353
Mthfd1l2	3.80002e-21	0.784973	0.545	0.379	1.27308e-16	PVT5	Mthfd1l	1.43799
Rimklb	8.25781e-11	1.15991	0.366	0.255	2.76653e-06	PVT5	Rimklb	1.43529
Cry1	3.51457e-10	0.720818	0.343	0.239	1.17745e-05	PVT5	Cry1	1.43515
Pxdn1	6.51413e-20	0.69702	0.543	0.38	2.18236e-15	PVT5	Pxdn	1.42895
Lncbate11	3.81351e-12	1.08958	0.416	0.292	1.2776e-07	PVT5	Lncbate1	1.42466
Syndig1	2.42463e-53	13.8961	0.869	0.61	8.12299e-49	PVT5	Syndig1	1.42459
Cacna1i1	1.45288e-10	0.538367	0.36	0.253	4.86744e-06	PVT5	Cacna1i	1.42292
Cdkl11	1.29961e-26	2.27725	0.69	0.485	4.35394e-22	PVT5	Cdkl1	1.42268
Sgcz	2.61904e-133	213.002	0.933	0.657	8.7743e-129	PVT5	Sgcz	1.42009
AI504432	1.35789e-12	0.88383	0.424	0.299	4.54919e-08	PVT5	AI504432	1.41806
Polk	8.51661e-11	0.931029	0.37	0.261	2.85324e-06	PVT5	Polk	1.41762
Fancl	1.00338e-10	0.603687	0.381	0.269	3.36151e-06	PVT5	Fancl	1.41636
[truncated: 345 more rows]

## Sheet: Supplementary File 1d
Supplementary File 1d. Differential gene expression analysis for integrated dataset in Figure 5
[truncated: 14,903 more rows]

[truncated: 1 more sheets: Supplementary File 1e]
